# Supplementary material for: Convergent and stereoselective synthesis of nonulosonic acid (NulO) scaffolds via imine/aldehyde reductive coupling
Source: Royal Society of Chemistry journal article supplement (doi:10.1039/d5qo01524c), 2026-01-01
Supplement: d5qo01524c1.pdf [file d5qo01524c1.pdf]

## Convergent and Stereoselective Synthesis of Nonulosonic acids (NuIOs) Scaffolds via Imine/Aldehyde Reductive Coupling

Arminas Jurys and Christian Marcus Pedersen\*

**Abstract:** Nonulosonic acids (NuIOs) represents an important class of monosaccharides, which has received increasing interest due to their biological roles and potential in vaccine development. As they are only sparsely found in nature, their chemical synthesis is key to exploit their full potential. In this work we describe a building block approach starting from the abundant natural products glucose and threonine. With a few simple modifications these can serve as coupling partners in a  $\text{SmI}_2$  mediated reductive cross-coupling, where two new stereocenters are constructed together with the C9 backbone. The approach is easily modified to access the desired diastereomer and we demonstrate, by the synthesis of 7 NuIOs, how both natural occurring as well as unknown NuIOs can be synthesized in a few steps from the available building blocks. The stereochemistry of the newly established stereocenters are carefully studied by transforming the NuIOs derivatives into their pyranosides followed by NMR studies. The assignment of stereochemistry is furthermore supported by a crystal structure and a model for the coupling reaction allowing us to propose rules for the stereochemical outcome making the stereochemical outcome of this approach predictable.

## Table of Contents

|                                      |    |
|--------------------------------------|----|
| General Experimental .....           | 3  |
| Experimental Procedures .....        | 3  |
| XRD Data of Compound <b>41</b> ..... | 27 |
| NMR Spectra .....                    | 33 |
| Author Contributions .....           | 92 |
| References .....                     | 92 |

## General Experimental

All chemicals and solvents were acquired from commercial providers and used without further purification unless specified differently. Synthesis of compounds **2**, **R**, **S**, **17** were done multiple times, but in the supporting are shown one example. Dry THF was obtained from an Innovative Technology PS-MD-05 solvent drying system or by drying over 4 Å MS. Dry toluene, CH<sub>2</sub>Cl<sub>2</sub>, and MeOH were obtained by drying over 4 Å MS. Reactions were monitored by thin-layer chromatography (TLC) carried out on VWR aluminum plates coated with silica F254 and visualized with UV light and/or stained with vanillin. Compounds were purified using Buchi Pure C-815 or C-810 Flash systems equipped with FlashPure EcoFlex Silica cartridges. NMR spectra were recorded on a Bruker 500 MHz Ultra Shield Plus spectrometer with a cryoprobe and a Bruker 500 MHz. The spectra were referenced using residual undeuterated solvent as an internal reference (CDCl<sub>3</sub>: <sup>1</sup>H NMR δ = 7.26 ppm, <sup>13</sup>C NMR δ = 77.16 ppm; DMSO-d<sub>6</sub>: <sup>1</sup>H NMR δ = 2.50 ppm, <sup>13</sup>C NMR δ = 39.52 ppm; D<sub>2</sub>O <sup>1</sup>H NMR δ = 4.79 ppm; MeOD-d<sub>4</sub>: <sup>1</sup>H NMR δ = 3.31 ppm, <sup>13</sup>C NMR δ = 49.00 ppm). The following abbreviations were used to explain NMR peak multiplicities: s = singlet, d = doublet, t = triplet, q = quartet, p = pentet, m = multiplet, br = broad and their combinations. The peaks were assigned using <sup>1</sup>H, <sup>13</sup>C, COSY, HSQC, HMBC and APT NMR experiments data. High resolution mass spectra (HRMS) were recorded on a Bruker Solarix XR7T ESI/MALDI-FT-ICR-MS instrument.

## Experimental Procedures

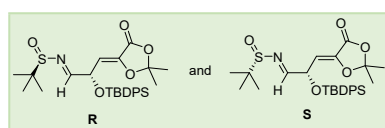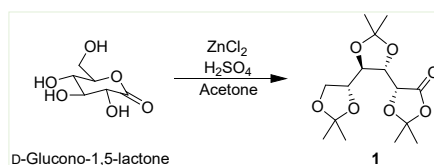

Compound **1** was prepared following the procedure of Jarosz *et al.*<sup>[1]</sup> ZnCl<sub>2</sub> (219 g, 1.57 mol, 2.8 equiv.) was suspended in acetone (1.15 L, 15.5 mol, 27.6 equiv.) under N<sub>2</sub> atmosphere and H<sub>2</sub>SO<sub>4</sub> (1.9 mL, 95%, 34 mmol, 0.06 equiv.) was added dropwise. After 15 min to a resulting clear solution D-glucono-1,5-lactone (100 g, 561 mmol, 1.0 equiv.) was added in one portion. And the reaction was stirred at room temperature under N<sub>2</sub> atmosphere for 24 h. Afterwards, the reaction mixture was poured into toluene/brine (600 mL/150 mL) and layers were separated. The organic layer was washed four times with brine (150 mL) until neutral pH. The first brine layer was back-extracted once with toluene (100 mL). The back extract was washed four times with brine (50 mL). The combined organic layers were dried over Na<sub>2</sub>SO<sub>4</sub>, filtered, concentrated *in vacuo*, suspended in MeOH (400 mL) and kept in the freezer (-25 °C) overnight. The resulting precipitates were filtered and dried under a high vacuum to give isopropylidene **1** (100.8 g) as an off-white solid. The mother liquid was concentrated *in vacuo*, suspended in MeOH (200 mL) and kept in the freezer (-25 °C) for 3 days. The resulting precipitates were filtered and dried under a high vacuum to provide a second portion of **1** (4.5 g) as white solid. The mother liquid was concentrated *in vacuo* again, suspended in MeOH (100 mL) and kept in the freezer (-25 °C) for overnight. The precipitates were filtered and dried *in vacuo* to give third portion of compound **1** (2.0 g) as a white solid. Total yield of the desired product **1** (107 g, 61%). <sup>1</sup>H, <sup>13</sup>C NMR was consistent with the literature.<sup>[1][2]</sup>

Data for **1**: Off-white solid; R<sub>f</sub>=0.49 (Heptane/EtOAc 3:1); <sup>1</sup>H NMR (500 MHz, CDCl<sub>3</sub>) δ 4.61 (d, J<sub>2,3</sub> = 1.6 Hz, 1H; H<sub>2</sub>), 4.27 (dd, J = 8.3, 1.5 Hz, 1H; H<sub>3</sub>), 4.14 (dd, J = 8.4, 6.0 Hz, 1H; H<sub>6</sub>), 4.11 – 4.07 (m, 1H; H<sub>5</sub>), 3.98 (dd, J = 8.4, 3.9 Hz, 1H; H<sub>6'</sub>), 3.94 (t, J = 8.5 Hz, 1H; H<sub>4</sub>), 1.64 (s, 3H; CH<sub>3</sub>), 1.56 (s, 3H; CH<sub>3</sub>), 1.41 (s, 3H; CH<sub>3</sub>), 1.39 (s, 3H; CH<sub>3</sub>), 1.38 (s, 3H; CH<sub>3</sub>), 1.33 (s, 3H; CH<sub>3</sub>). <sup>13</sup>C NMR (126 MHz, CDCl<sub>3</sub>) δ 170.8 (C1), 111.6 (CMe<sub>2</sub>), 110.5 (CMe<sub>2</sub>), 109.9 (C"Me<sub>2</sub>), 78.8 (C3), 77.3 (C5), 76.5 (C4), 73.9 (C2), 68.0 (C6), 27.3 (CH<sub>3</sub>), 27.1 (CH<sub>3</sub>), 26.8 (CH<sub>3</sub>), 26.7 (CH<sub>3</sub>), 25.3 (CH<sub>3</sub>).

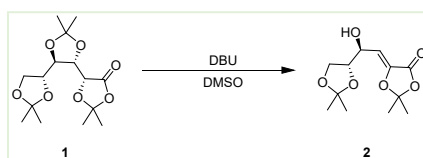

1,2:3,4:5,6-tri-O-isopropylidene-D-gluconate (**1**) (10.0 g, 31.6 mmol, 1.0 equiv.) was suspended in DMSO (60 mL) under N<sub>2</sub> atmosphere and DBU (0.97 mL, 6.4 mmol, 0.2 equiv.) was added dropwise. The reaction was stirred at 70 °C for 7h. Afterwards, the mixture was cooled to room temperature, poured into H<sub>2</sub>O/EtOAc (60 mL : 60 mL), layers were separated, and the organic layer was additionally washed twice with H<sub>2</sub>O (30 mL). The combined water layers were back-extracted once with EtOAc (20 mL). The combined organic layers were washed once with brine (15 mL), dried over Na<sub>2</sub>SO<sub>4</sub>, filtered, concentrated on silica gel, and purified using Büchi Pure C-815 Flash system (FlashPure EcoFlex Silica 25 g column, eluent: 15% : 85% EtOAc/Heptane → 100% EtOAc) to yield (Z)-3-deoxy-1,2:5,6-di-O-isopropylidene-D-erythro-hex-3-enolactone (**2**) (2.92 g, 36%) as a yellowish oil and to recover starting material **1** (3.88 g, 39%) as a white solid. Yield based on recovered starting material: 59%. <sup>1</sup>H NMR was consistent with the literature.<sup>[2]</sup>

Data for **2**: Yellowish oil;  $R_f$ =0.39 (Heptane/EtOAc 1:1);  $^1\text{H}$  NMR (500 MHz,  $\text{CDCl}_3$ )  $\delta$  5.60 (d,  $J$  = 7.9 Hz, 1H; H3), 4.63 (ddd,  $J$  = 7.9, 4.8, 3.9 Hz, 1H; H4), 4.18 (td,  $J$  = 6.2, 4.7 Hz, 1H; H5), 4.02 (dd,  $J$  = 8.5, 6.6 Hz, 1H; H6), 3.93 (dd,  $J$  = 8.4, 5.9 Hz, 1H; H6'), 2.31 (d,  $J$  = 3.9 Hz, 1H; OH), 1.64 (s, 6H; 2 x  $\text{CH}_3$ ), 1.44 (s, 3H;  $\text{CH}_3$ ), 1.36 (s, 3H;  $\text{CH}_3$ ).  $^{13}\text{C}$  NMR (126 MHz,  $\text{CDCl}_3$ )  $\delta$  162.2 (C1), 130.0 (C2), 112.0 ( $\text{CMe}_2$ ), 109.8 ( $\text{CMe}_2$ ), 107.1 (C3), 77.7 (C4), 67.2 (C5), 65.3 (C6), 26.9 ( $\text{CH}_3$ ), 26.9 ( $\text{CH}_3$ ), 26.6 ( $\text{CH}_3$ ), 25.2 ( $\text{CH}_3$ ).

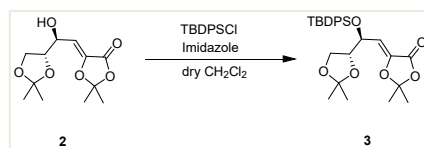

TBDPSCI (5.0 mL, 18.7 mmol, 1.05 equiv.) was added dropwise over 10 min to a stirred solution of 1,2:5,6-di-O-isopropylidene-D-erythro-hex-3-enolactone (**2**) (4.57 g, 17.7 mmol, 1.0 equiv.) and imidazole (2.43 g, 35.4 mmol, 2.0 equiv.) in dry  $\text{CH}_2\text{Cl}_2$  (50 mL) under  $\text{N}_2$  atmosphere at 0 °C. After 10 min, the ice bath was removed, and the reaction was stirred at room temperature for 3.5h. Afterwards, the mixture was poured into  $\text{CH}_2\text{Cl}_2/\text{H}_2\text{O}$  (150 mL : 50 mL), layers were separated. The organic layer was washed twice with  $\text{H}_2\text{O}$  (50 mL), once with brine (20 mL), dried over  $\text{Na}_2\text{SO}_4$ , filtered and concentrated under high vacuum to yield crude (Z)-5-((S)-2-((tert-butyldiphenylsilyl)oxy)-2-((R)-2,2-dimethyl-1,3-dioxolan-4-yl)ethylidene)-2,2-dimethyl-1,3-dioxolan-4-one (**3**) (9.76 g) as a colorless oil, which was used in the next step without further purification. A small amount of the crude oil was purified using Büchi Pure C-815 Flash system (FlashPure EcoFlex Silica 12 g column, eluent: 11% : 89% EtOAc/Heptane  $\rightarrow$  100% EtOAc) for the analysis.

Data for **3**: Colorless oil;  $R_f$ =0.49 (Heptane/EtOAc 3:1);  $^1\text{H}$  NMR (500 MHz,  $\text{CDCl}_3$ )  $\delta$  7.73 – 7.68 (m, 2H; TBDPS), 7.64 – 7.59 (m, 2H; TBDPS), 7.45 – 7.40 (m, 1H; TBDPS), 7.40 – 7.35 (m, 3H; TBDPS), 7.35 – 7.31 (m, 2H; TBDPS), 5.44 (d,  $J$  = 9.3 Hz, 1H; H3), 4.60 (dd,  $J$  = 9.2, 5.9 Hz, 1H; H4), 4.10 – 4.04 (m, 1H; H5), 4.01 (dd,  $J$  = 8.3, 6.2 Hz, 1H; H6), 3.93 (dd,  $J$  = 8.3, 5.6 Hz, 1H; H6'), 1.46 (s, 3H;  $\text{CH}_3$ ), 1.33 (s, 3H;  $\text{CH}_3$ ), 1.32 (s, 3H;  $\text{CH}_3$ ), 1.28 (s, 3H;  $\text{CH}_3$ ), 1.06 (s, 9H; TBDPS).  $^{13}\text{C}$  NMR (126 MHz,  $\text{CDCl}_3$ )  $\delta$  162.2 (C=O), 138.9 (C2), 136.1 (TBDPS), 136.1 (TBDPS), 133.7 (TBDPS), 133.4 (TBDPS), 130.0 (TBDPS), 129.9 (TBDPS), 127.7 (TBDPS), 127.6 (TBDPS), 111.4 ( $\text{CMe}_2$ ), 109.6 ( $\text{CMe}_2$ ), 108.9 (C3), 78.8 (C5), 68.9 (C4), 66.2 (C6), 27.1 (TBDPS), 26.7 ( $\text{C}(\text{CH}_3)_2$ ), 26.6 ( $\text{C}(\text{CH}_3)_2$ ), 26.4 ( $\text{C}(\text{CH}_3)_2$ ), 25.5 ( $\text{C}(\text{CH}_3)_2$ ), 19.5 (TBDPS). HRMS (ESI+):  $m/z$  calcd for  $\text{C}_{28}\text{H}_{36}\text{O}_6\text{SiNa}^+$ : 519.21734 [ $M+\text{Na}$ ] $^+$ ; found: 519.21833.

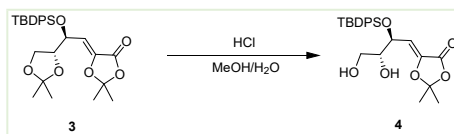

The crude (Z)-5-((S)-2-((tert-butyldiphenylsilyl)oxy)-2-((R)-2,2-dimethyl-1,3-dioxolan-4-yl)ethylidene)-2,2-dimethyl-1,3-dioxolan-4-one (**3**) (9.44 g) was dissolved in MeOH/ $\text{H}_2\text{O}$  (90 mL; 13 : 2) and HCl (0.15 mL, 37%, 1.8 mmol, 0.1 equiv.) was added dropwise. The reaction was stirred at room temperature for 3 days. Afterwards, the mixture was concentrated, dissolved in EtOAc, concentrated on silica gel and purified using Büchi Pure C-810 Flash system (FlashPure EcoFlex Silica 40 g column, eluent: 37% : 63% EtOAc/Heptane  $\rightarrow$  100% EtOAc) to yield (Z)-5-((2S,3R)-2-((tert-butyldiphenylsilyl)oxy)-3,4-dihydroxybutylidene)-2,2-dimethyl-1,3-dioxolan-4-one (**4**) (6.93 g, 89% over two steps) as a colorless oil.

Data for **4**: Colorless oil;  $R_f$ =0.36 (Heptane/EtOAc 1:1);  $^1\text{H}$  NMR (500 MHz,  $\text{CDCl}_3$ )  $\delta$  7.70 – 7.67 (m, 2H; TBDPS), 7.63 – 7.60 (m, 2H; TBDPS), 7.47 – 7.42 (m, 1H; TBDPS), 7.42 – 7.38 (m, 3H; TBDPS), 7.36 – 7.32 (m, 2H; TBDPS), 5.57 (d,  $J$  = 9.0 Hz, 1H; H3), 4.66 (dd,  $J$  = 8.9, 4.2 Hz, 1H; H4), 3.73 (dt,  $J$  = 6.0, 3.9 Hz, 1H; H5), 3.69 (dd,  $J$  = 11.3, 6.1 Hz, 1H; H6), 3.61 (dd,  $J$  = 11.3, 3.6 Hz, 1H; H6'), 2.05 (br, 2H; 2 x OH), 1.48 (s, 3H;  $\text{CH}_3$ ), 1.29 (s, 3H;  $\text{CH}_3$ ), 1.08 (s, 9H; TBDPS).  $^{13}\text{C}$  NMR (126 MHz,  $\text{CDCl}_3$ )  $\delta$  162.0 (C=O), 138.8 (C2), 136.1 (TBDPS), 136.0 (TBDPS), 133.1 (TBDPS), 132.9 (TBDPS), 130.2 (TBDPS), 130.2 (TBDPS), 128.0 (TBDPS), 127.8 (TBDPS), 111.6 ( $\text{CMe}_2$ ), 108.1 (C3), 74.8 (C5), 70.4 (C4), 63.2 (C6), 27.1 (TBDPS), 26.7 ( $\text{C}(\text{CH}_3)_2$ ), 26.5 ( $\text{C}(\text{CH}_3)_2$ ), 19.4 (TBDPS). HRMS (ESI+):  $m/z$  calcd for  $\text{C}_{25}\text{H}_{32}\text{O}_6\text{SiNa}^+$ : 479.18604 [ $M+\text{Na}$ ] $^+$ ; found: 479.18495.

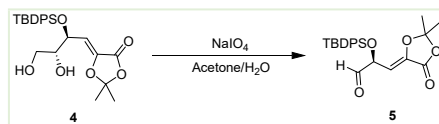

(Z)-5-((2S,3R)-2-((tert-butyldiphenylsilyl)oxy)-3,4-dihydroxybutylidene)-2,2-dimethyl-1,3-dioxolan-4-one (**4**) (6.78 g, 14.9 mmol, 1.0 equiv.) was dissolved in acetone/ $\text{H}_2\text{O}$  (100 mL, 3 : 2) and  $\text{NaIO}_4$  (3.81 g, 17.8 mmol, 1.2 equiv.) was added in one portion. The reaction was stirred at room temperature for 4h. Afterwards, the mixture was poured into EtOAc/brine (100 mL : 75 mL) and the water layer was additionally extracted twice with EtOAc (50 mL). The combined organic layers were dried over  $\text{Na}_2\text{SO}_4$ , filtered, concentrated under high vacuum to give a cloudy oil. The oil was dissolved in  $\text{CHCl}_3$ , filtered and concentrated *in vacuo* to give the crude (S,Z)-2-((tert-butyldiphenylsilyl)oxy)-3-(2,2-dimethyl-5-oxo-1,3-dioxolan-4-ylidene)propanal (**5**) (6.09 g) as a slightly yellow oil, which was used in the next step without additional purification. A small amount of the crude oil was purified using Büchi Pure C-815 Flash system (FlashPure EcoFlex Silica 12 g column, eluent: 14% : 86% EtOAc/Heptane  $\rightarrow$  100% EtOAc) for the analysis.

Data for **5**: Colorless oil;  $R_f$ =0.55 (Heptane/EtOAc 2:1);  $^1\text{H}$  NMR (500 MHz,  $\text{CDCl}_3$ )  $\delta$  9.54 (d,  $J$  = 1.1 Hz, 1H; H5), 7.67 – 7.62 (m, 4H; TBDPS), 7.47 – 7.41 (m, 2H; TBDPS), 7.40 – 7.34 (m, 4H; TBDPS), 5.54 (d,  $J$  = 8.4 Hz, 1H; H3), 4.88 (dd,  $J$  = 8.4, 1.1 Hz, 1H; H4), 1.54 (s, 3H;  $\text{CH}_3$ ), 1.41 (s, 3H;  $\text{CH}_3$ ), 1.11 (s, 9H; TBDPS).  $^{13}\text{C}$  NMR (126 MHz,  $\text{CDCl}_3$ )  $\delta$  197.7 (C5), 161.8 (C1), 140.5 (C2), 135.9 (TBDPS), 135.9 (TBDPS), 132.8 (TBDPS), 132.6 (TBDPS), 130.3 (TBDPS), 130.2 (TBDPS), 128.0 (TBDPS), 127.9 (TBDPS), 112.2 ( $\text{CMe}_2$ ), 104.1 (C3), 74.4 (C4), 26.9 (TBDPS), 26.7 ( $\text{C}(\text{CH}_3)_2$ ), 26.6 ( $\text{C}(\text{CH}_3)_2$ ), 19.4 (TBDPS). HRMS (ESI $^+$ ):  $m/z$  calcd for  $\text{C}_{24}\text{H}_{28}\text{O}_5\text{SiNa}^+$ : 447.15982 [ $M+\text{Na}$ ] $^+$ ; found: 447.16282

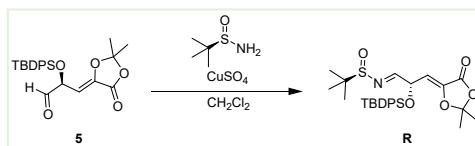

Crude (S,Z)-2-((tert-butyldiphenylsilyl)oxy)-3-(2,2-dimethyl-5-oxo-1,3-dioxolan-4-ylidene)propanal (**5**) (1.00 g, 2.4 mmol, 1.0 equiv.), (R)-2-methylpropane-2-sulfinamide (0.58 g, 4.7 mmol, 2.0 equiv.) and  $\text{CuSO}_4$  (0.83 g, 5.2 mmol, 2.2 equiv.) were suspended in dry  $\text{CH}_2\text{Cl}_2$  (20 mL) under  $\text{N}_2$  atmosphere. The reaction was stirred at room temperature in a vial with a cap for 5 days. Afterwards, the mixture was filtered through celite layer and the pad rinsed with  $\text{CH}_2\text{Cl}_2$ . The filtrate was concentrated on silica gel and purified using Büchi Pure C-815 Flash system (FlashPure EcoFlex Silica 25 g column, eluent: 17% : 83% EtOAc/Heptane  $\rightarrow$  100% EtOAc) to yield sulfinimine **R** (1.05 g, 84% over two steps) as a yellow oil.

Data for **R**: Yellow oil;  $R_f$ =0.30 (Heptane/EtOAc 3:1);  $^1\text{H}$  NMR (500 MHz,  $\text{CDCl}_3$ )  $\delta$  7.97 (d,  $J$  = 4.1 Hz, 1H; H5), 7.67 – 7.62 (m, 4H; TBDPS), 7.45 – 7.39 (m, 2H; TBDPS), 7.39 – 7.32 (m, 4H; TBDPS), 5.64 (d,  $J$  = 8.4 Hz, 1H; H3), 5.33 (dd,  $J$  = 8.4, 4.2 Hz, 1H; H4), 1.49 (s, 3H;  $\text{CH}_3$ ), 1.38 (s, 3H;  $\text{CH}_3$ ), 1.12 (s, 9H;  $t\text{BuS}(\text{O})\text{N}$ ), 1.08 (s, 9H; TBDPS).  $^{13}\text{C}$  NMR (126 MHz,  $\text{CDCl}_3$ )  $\delta$  166.7 (C5), 161.9 (C4), 139.1 (C2), 135.9 (TBDPS), 135.9 (TBDPS), 133.0 (TBDPS), 132.7 (TBDPS), 130.2 (TBDPS), 130.1 (TBDPS), 127.9 (TBDPS), 127.8 (TBDPS), 112.0 ( $\text{CMe}_2$ ), 106.9 (C3), 70.7 (C4), 57.4 ( $(\text{CH}_3)_3\text{CS}(\text{O})\text{N}$ ), 26.9 (TBDPS), 26.7 ( $\text{C}(\text{CH}_3)_2$ ), 26.6 ( $\text{C}(\text{CH}_3)_2$ ), 22.5 ( $(\text{CH}_3)_3\text{CS}(\text{O})\text{N}$ ), 19.4 (TBDPS). HRMS (ESI $^+$ ):  $m/z$  calcd for  $\text{C}_{28}\text{H}_{37}\text{NO}_5\text{SSiNa}^+$ : 550.20539 [ $M+\text{Na}$ ] $^+$ ; found: 550.20604

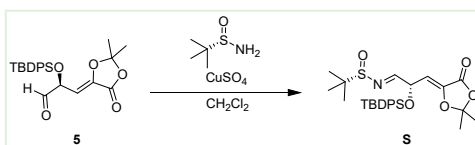

Crude (S,Z)-2-((tert-butyldiphenylsilyl)oxy)-3-(2,2-dimethyl-5-oxo-1,3-dioxolan-4-ylidene)propanal (**5**) (1.00 g, 2.4 mmol, 1.0 equiv.), (S)-2-methylpropane-2-sulfinamide (0.59 g, 4.7 mmol, 2.0 equiv.) and  $\text{CuSO}_4$  (0.83 g, 5.2 mmol, 2.2 equiv.) were suspended in dry  $\text{CH}_2\text{Cl}_2$  (20 mL) under  $\text{N}_2$  atmosphere. The reaction was stirred at room temperature in a vial with a cap for 5 days. Afterwards, the mixture was filtered through celite layer and the pad rinsed with  $\text{CH}_2\text{Cl}_2$ . The filtrate was concentrated on silica gel and purified using Büchi Pure C-815 Flash system (FlashPure EcoFlex Silica 25 g column, eluent: 17% : 83% EtOAc/Heptane  $\rightarrow$  100% EtOAc) to yield sulfinimine **S** (1.05 g, 84% over two steps) as a yellow oil.

Data for **S**: Yellow oil;  $R_f$ =0.31 (Heptane/EtOAc 3:1);  $^1\text{H}$  NMR (500 MHz,  $\text{CDCl}_3$ )  $\delta$  7.95 (d,  $J$  = 3.5 Hz, 1H; H5), 7.69 – 7.62 (m, 4H; TBDPS), 7.45 – 7.39 (m, 2H; TBDPS), 7.38 – 7.32 (m, 4H; TBDPS), 5.61 (d,  $J$  = 8.4 Hz, 1H; H3), 5.31 (dd,  $J$  = 8.4, 3.5 Hz, 1H; H4), 1.50 (s, 3H;  $\text{CH}_3$ ), 1.38 (s, 3H;  $\text{CH}_3$ ), 1.16 (s, 9H;  $t\text{BuS}(\text{O})\text{N}$ ), 1.07 (s, 9H; TBDPS).  $^{13}\text{C}$  NMR (126 MHz,  $\text{CDCl}_3$ )  $\delta$  166.5 (C5), 162.1 (C1), 139.3 (C2), 136.0 (TBDPS), 135.9 (TBDPS), 133.1 (TBDPS), 132.9 (TBDPS), 130.1 (TBDPS), 130.1 (TBDPS), 127.9 (TBDPS), 127.8 (TBDPS), 112.0 ( $\text{CMe}_2$ ), 106.7 (C3), 70.5 (C4), 57.2 ( $(\text{CH}_3)_3\text{CS}(\text{O})\text{N}$ ), 26.9 (TBDPS), 26.7 ( $\text{C}(\text{CH}_3)_2$ ), 26.6 ( $\text{C}(\text{CH}_3)_2$ ), 22.5 ( $(\text{CH}_3)_3\text{CS}(\text{O})\text{N}$ ), 19.4 (TBDPS). HRMS (ESI $^+$ ):  $m/z$  calcd for  $\text{C}_{28}\text{H}_{37}\text{NO}_5\text{SiH}^+$ : 528.22345 [ $M+\text{H}$ ] $^+$ ; found: 528.22616

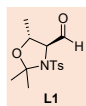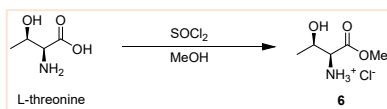

MeOH (100 mL) was cooled in an ice bath and  $\text{SOCl}_2$  (7.0 mL, 96 mmol, 1.0. equiv.) was added dropwise under  $\text{N}_2$  atmosphere. To the resultant solution of HCl in MeOH, L-threonine (12.0 g, 97.7 mmol, 1.0 equiv.) was added in one portion and the reaction was refluxed for 4h. Afterwards, the mixture was cooled to room temperature and concentrated under reduced pressure to yield crude L-threonine methyl ester hydrochloride (**6**) (16.8 g) as a colorless oil, which was used in next steps without additional purification. Note: some of MeOH is still remaining after high vacuum drying.<sup>[3]</sup> NMR was consistent with the literature.<sup>[4]</sup>

$^1\text{H}$  NMR (500 MHz,  $\text{D}_2\text{O}$ )  $\delta$  4.49 – 4.42 (m, 1H; H3), 4.13 (d,  $J$  = 3.8 Hz, 1H; H2), 3.89 (s, 3H; OMe), 1.36 (d,  $J$  = 6.6 Hz, 3H;  $\text{CH}_3$ ).  $^{13}\text{C}$  NMR (126 MHz,  $\text{D}_2\text{O}$ )  $\delta$  169.2 (C=O), 65.2 (C3), 58.4 (C2), 53.7 (OMe), 18.7 ( $\text{CH}_3$ ). HRMS (ESI $^+$ ):  $m/z$  calcd for  $\text{C}_5\text{H}_{12}\text{NO}_3^+$ : 134.08117 [ $M+\text{H}$ ] $^+$ ; found: 134.08127.

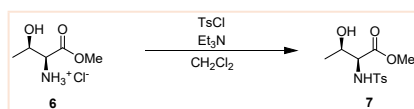

Compound **7** was prepared following slightly modified procedure of Minakata *et al.*<sup>[5]</sup> To a suspension of crude L-threonine methyl ester hydrochloride (**6**) (1.85 g, 10.9 mmol, 1.0 equiv.) in dry CH<sub>2</sub>Cl<sub>2</sub> (40 mL) cooled in an ice bath under N<sub>2</sub> atmosphere was added Et<sub>3</sub>N (3.1 mL, 22 mmol, 2.0 equiv.) followed by addition of TsCl (2.23 g, 11.5 mmol, 1.05 equiv.) in two portions. The reaction was stirred at 1 °C for 22h. Afterwards, the solids were filtered off and the filtrate was concentrated *in vacuo*, dissolved in EtOAc (50 mL), washed with sat. NaHCO<sub>3</sub> (20 mL), aqueous HCl (20 mL, 0.1 M), H<sub>2</sub>O (20 mL), dried over Na<sub>2</sub>SO<sub>4</sub>, filtered, concentrated under reduced pressure to yield crude product as a colorless oil. The crude oil was dissolved in EtOAc/Hexane (20 mL, 1:1) and cooled in an ice bath. The formed precipitates were filtered and dried under high vacuum to yield N-tosyl-L-threonine methyl ester (**7**) (1.96 g, 63%) as a white solid. The mother liquid was concentrated, dissolved in EtOAc/Hexane (10 mL, 1:1) and kept in the freezer (-25 °C) overnight. The formed solids were filtered and dried under high vacuum to yield a second portion of desired product **7** (0.55 g, 17%) as a white solid. Total yield: 80% (2.51 g). <sup>1</sup>H NMR was consistent with the literature.<sup>[6]</sup>

Data for **7**: White solid; *R*<sub>f</sub>=0.20 (Heptane/EtOAc 1:1); <sup>1</sup>H NMR (500 MHz, CDCl<sub>3</sub>) δ 7.72 (d, *J* = 7.7 Hz, 2H; Ts), 7.29 (d, *J* = 8.5 Hz, 2H; Ts), 5.48 (d, *J* = 9.6 Hz, 1H; NH), 4.18 – 4.10 (m, 1H; H<sub>3</sub>), 3.82 (ddd, *J* = 9.6, 3.0, 0.9 Hz, 1H; H<sub>2</sub>), 3.52 (s, 3H; OMe), 2.42 (s, 3H; Ts), 2.12 (br, 1H; OH), 1.27 (dd, *J* = 6.4, 0.9 Hz, 3H; H<sub>4</sub>). <sup>13</sup>C NMR (126 MHz, CDCl<sub>3</sub>) δ 170.8 (C=O), 143.9 (Ts), 136.8 (Ts), 129.8 (Ts), 127.4 (Ts), 68.5 (C<sub>3</sub>), 61.1 (C<sub>2</sub>), 52.8 (OMe), 21.7 (Ts), 20.0 (C<sub>4</sub>). HRMS (ESI<sup>+</sup>): *m/z* calcd for C<sub>12</sub>H<sub>18</sub>NO<sub>5</sub>S<sup>+</sup>: 288.09002 [*M*+H]<sup>+</sup>; found: 288.09010.

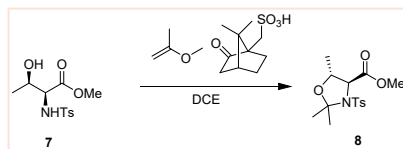

Compound **8** was prepared following slightly modified procedure of Koide *et al.*<sup>[7]</sup> N-tosyl-L-threonine methyl ester (**7**) (2.50 g, 8.70 mmol, 1.0 equiv.) and (+)-10-Camphorsulfonic acid (40 mg, 0.17 mmol, 2 mol%) were dissolved in DCE (15 mL) under N<sub>2</sub> atmosphere and 2-methoxypropene (1.7 mL, 17 mmol, 2.0 equiv.) was added dropwise. The reaction was refluxed for 2.5h, cooled to room temperature, concentrated on silica gel and purified using Büchi Pure C-815 Flash system (FlashPure EcoFlex Silica 25 g column, eluent: 21% : 79% EtOAc/Heptane → 100% EtOAc) to yield methyl (4S,5R)-2,2,5-trimethyl-3-tosyloxazolidine-4-carboxylate (**8**) (2.76 g, 97%) as a yellow oil. NMR was consistent with the literature.<sup>[7]</sup>

Data for **8**: Yellow oil; *R*<sub>f</sub>=0.53 (Heptane/EtOAc 2:1); <sup>1</sup>H NMR (500 MHz, CDCl<sub>3</sub>) δ 7.80 – 7.74 (m, 2H; Ts), 7.32 – 7.28 (m, 2H; Ts), 4.30 (dq, *J* = 7.6, 6.1 Hz, 1H; H<sub>3</sub>), 3.92 (d, *J* = 7.4 Hz, 1H; H<sub>2</sub>), 3.79 (s, 3H; OMe), 2.42 (s, 3H; Ts), 1.60 (s, 3H; C(CH<sub>3</sub>)<sub>2</sub>), 1.53 (s, 3H; C(CH<sub>3</sub>)<sub>2</sub>), 1.32 (d, *J* = 6.0 Hz, 3H; H<sub>4</sub>). <sup>13</sup>C NMR (126 MHz, CDCl<sub>3</sub>) δ 170.8 (C=O), 143.7 (Ts), 137.7 (Ts), 129.6 (Ts), 127.7 (Ts), 98.1 (C(CH<sub>3</sub>)<sub>2</sub>), 74.5 (C<sub>3</sub>), 67.3 (C<sub>2</sub>), 52.8 (OMe), 27.9 (C(CH<sub>3</sub>)<sub>2</sub>), 26.2 (C(CH<sub>3</sub>)<sub>2</sub>), 21.5 (Ts), 18.5 (C<sub>4</sub>). HRMS (ESI<sup>+</sup>): *m/z* calcd for C<sub>15</sub>H<sub>21</sub>NO<sub>5</sub>SN<sup>+</sup>: 350.10326 [*M*+Na]<sup>+</sup>; found: 350.10343.

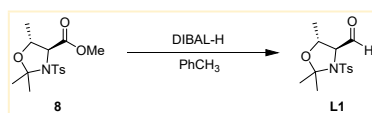

A solution of methyl (4S,5R)-2,2,5-trimethyl-3-tosyloxazolidine-4-carboxylate (**8**) (2.66 g, 8.12 mmol, 1.0 equiv.) in dry PhCH<sub>3</sub> (55 mL) was cooled to -78 °C under N<sub>2</sub> atmosphere and DIBAL-H (9.5 mL, 25%, 14 mmol, 1.7 equiv.) in PhCH<sub>3</sub> was added dropwise over 10 min. The reaction was stirred at -78 °C for 3h and subsequently quenched with MeOH (1.5 mL). The quenched reaction mixture was diluted with Et<sub>2</sub>O (50 mL), sat. Rochelle's salt (50 mL) and H<sub>2</sub>O (100 mL). The water layer was extracted three times with EtOAc (50 mL). The combined organic layers were washed once with H<sub>2</sub>O (30 mL), once with brine (30 mL), dried over Na<sub>2</sub>SO<sub>4</sub>, filtered and concentrated. The resulting solid was dissolved in Et<sub>2</sub>O/Heptane (20 mL, 1:1) and left overnight in the freezer (-25 °C). The formed precipitates were filtered, dried under high vacuum to yield (4S,5R)-2,2,5-trimethyl-3-tosyloxazolidine-4-carbaldehyde (**L1**) (2.0 g, 82%) as white crystals. The mother liquid was concentrated, dissolved in Et<sub>2</sub>O/Heptane (10 mL, 1:1) and left in the freezer (-25 °C) overnight. The resulting solids were filtered, dried *in vacuo* to yield a second portion of the aldehyde **L1** (0.13 g, 5%) as white crystals. Total yield 87% (2.1 g).

Data for **L1**: White crystals; *R*<sub>f</sub>=0.39 (Heptane/EtOAc 3:1); <sup>1</sup>H NMR (500 MHz, CDCl<sub>3</sub>) δ 9.58 (d, *J* = 4.6 Hz, 1H; H<sub>1</sub>), 7.70 – 7.63 (m, 2H; Ts), 7.32 (d, *J* = 7.9 Hz, 2H; Ts), 4.22 (dq, *J* = 8.4, 6.1 Hz, 1H; H<sub>3</sub>), 3.50 (dd, *J* = 8.3, 4.5 Hz, 1H; H<sub>2</sub>), 2.43 (s, 3H; Ts), 1.67 (s, 3H; C(CH<sub>3</sub>)<sub>2</sub>), 1.49 (s, 3H; C(CH<sub>3</sub>)<sub>2</sub>), 1.27 (d, *J* = 6.0 Hz, 3H; H<sub>4</sub>). <sup>13</sup>C NMR (126 MHz, CDCl<sub>3</sub>) δ 197.2 (C<sub>1</sub>), 144.2 (Ts), 136.8 (Ts), 130.0 (Ts), 127.7 (Ts), 98.3 (C(CH<sub>3</sub>)<sub>2</sub>), 72.4 (C<sub>2</sub>), 70.5 (C<sub>3</sub>), 29.0 (C(CH<sub>3</sub>)<sub>2</sub>), 25.7 (C(CH<sub>3</sub>)<sub>2</sub>), 21.7 (Ts), 17.4 (C<sub>4</sub>). HRMS (ESI<sup>+</sup>): *m/z* calcd for C<sub>14</sub>H<sub>19</sub>NO<sub>4</sub>SN<sup>+</sup>: 320.09270 [*M*+Na]<sup>+</sup>; found: 320.09232

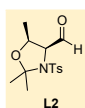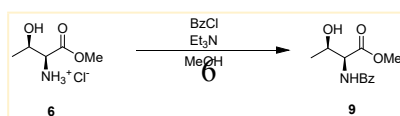

Compound **9** was prepared following slightly modified procedure of Tanner *et al.*<sup>[8]</sup> The crude L-threonine methyl ester hydrochloride (**6**) (13.2 g, 21.8 mmol, 1.0 equiv.) was dissolved in dry MeOH (50 mL) under N<sub>2</sub> atmosphere and Et<sub>3</sub>N (32.0 mL, 230 mmol, 3.0 equiv.) was added dropwise. After 15 min, the reaction mixture was cooled in an ice bath and BzCl (9.6 mL, 83 mmol, 1.1 equiv.) was added dropwise. The reaction was stirred at 0 °C for 3h. Afterwards, the mixture was concentrated, diluted with H<sub>2</sub>O (50 mL) and extracted three times with EtOAc (50 mL). The combined organic layers were washed once with H<sub>2</sub>O (25 mL), once with brine (25 mL). The combined water layers were back-extracted once with EtOAc (25 mL). The combined organic layers were dried over Na<sub>2</sub>SO<sub>4</sub>, filtered and concentrated to give yellowish oil. The oil was dissolved in Et<sub>2</sub>O (30 mL) and kept in the freezer (-25 °C) overnight. The formed solids were filtered and dried under high vacuum to yield *N*-benzoyl-L-threonine methyl ester (**9**) (14.6 g, 79% over two steps) as off-white solids. NMR was consistent with the literature.<sup>[8]</sup>

Data for **9**: Off-white solid; *R*<sub>f</sub>=0.44 (Heptane/EtOAc 1:3); <sup>1</sup>H NMR (500 MHz, CDCl<sub>3</sub>) δ 7.87 – 7.80 (m, 2H; Bz), 7.54 – 7.49 (m, 1H; Bz), 7.43 (ddd, *J* = 8.0, 6.5, 1.3 Hz, 2H; Bz), 7.00 (d, *J* = 9.0 Hz, 1H; NH), 4.82 (dd, *J* = 8.7, 2.4 Hz, 1H; H<sub>2</sub>), 4.45 (qd, *J* = 6.5, 2.5 Hz, 1H; H<sub>3</sub>), 3.78 (s, 3H; OMe), 2.63 (s, 1H; OH), 1.28 (d, *J* = 6.3 Hz, 3H; CH<sub>3</sub>; H<sub>4</sub>). <sup>13</sup>C NMR (126 MHz, CDCl<sub>3</sub>) δ 171.8 (C1), 168.1 (Bz), 133.8 (Bz), 132.1 (Bz), 128.8 (Bz), 127.3 (Bz), 68.4 (C3), 57.8 (C2), 52.8 (OMe), 20.2 (C4). HRMS (ESI<sup>+</sup>): *m/z* calcd for C<sub>12</sub>H<sub>16</sub>NO<sub>4</sub><sup>+</sup>: 238.10738 [*M*+H]<sup>+</sup>; found: 238.10740.

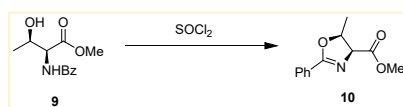

Compound **10** was prepared following the modified procedure of Sulikowski *et al.*<sup>[9]</sup> To SOCl<sub>2</sub> (45.0 mL, 620 mmol, 10.5 equiv.) at 0 °C under N<sub>2</sub> atmosphere, *N*-benzoyl-L-threonine methyl ester (**9**) (14.0 g, 59.0 mmol, 1.0 equiv.) was added in three portions. The reaction was stirred at 1 °C for 5 days. Afterwards, the mixture was concentrated, dissolved in CH<sub>2</sub>Cl<sub>2</sub>, slowly poured into sat. NaHCO<sub>3</sub> (100 mL) and extracted three times with CH<sub>2</sub>Cl<sub>2</sub> (50 mL). The combined organic layers were washed once with H<sub>2</sub>O (50 mL), once with brine (20 mL), dried over Na<sub>2</sub>SO<sub>4</sub>, filtered, concentrated and purified using Büchi Pure C-815 Flash system (FlashPure EcoFlex Silica 40 g column, eluent: 32% : 68% EtOAc/Heptane → 100% EtOAc) to yield methyl (4*S*,5*S*)-5-methyl-2-phenyl-4,5-dihydrooxazole-4-carboxylate (**10**) (12.4 g, 96 %) as a yellowish oil. NMR was consistent with the literature.<sup>[10]</sup>

Data for **10**: Yellowish oil; *R*<sub>f</sub>=0.45 (Heptane/EtOAc 1:1); <sup>1</sup>H NMR (500 MHz, CDCl<sub>3</sub>) δ 8.00 – 7.95 (m, 2H; Ph), 7.51 – 7.47 (m, 1H; Ph), 7.43 – 7.39 (m, 2H; Ph), 5.10 – 5.03 (m, 1H; H<sub>3</sub>), 4.98 (d, *J* = 10.1 Hz, 1H; H<sub>2</sub>), 3.77 (s, 3H; OMe), 1.38 (d, *J* = 6.3 Hz, 3H; H<sub>4</sub>). <sup>13</sup>C NMR (126 MHz, CDCl<sub>3</sub>) δ 170.5 (C1), 166.3 (PhC(O)N), 131.9 (Ph), 128.7 (Ph), 128.4 (Ph), 127.4 (Ph), 77.8 (C3), 71.9 (C2), 52.2 (OMe), 16.4 (C4). HRMS (ESI<sup>+</sup>): *m/z* calcd for C<sub>12</sub>H<sub>14</sub>NO<sub>3</sub><sup>+</sup>: 220.09682 [*M*+H]<sup>+</sup>; found: 220.09685.

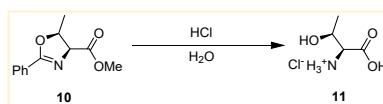

Compound **11** was prepared following slightly modified procedure of Sulikowski *et al.*<sup>[9]</sup> Methyl (4*S*,5*S*)-5-methyl-2-phenyl-4,5-dihydrooxazole-4-carboxylate (**10**) (12.4 g, 56.6 mmol, 1.0 equiv.) was suspended in H<sub>2</sub>O (75 mL) and HCl (65 mL, 37%, 0.78 mol, 14 equiv.) was added via syringe. The reaction mixture was refluxed for 5h. Afterwards, the mixture was cooled to room temperature and washed three times with Et<sub>2</sub>O (75 mL). The aqueous layer was concentrated *in vacuo* to give L-*allo*-threonine hydrochloride (**11**) (9.0 g) as a yellowish oil, which was used in next steps without additional purifications. NMR was consistent with the literature.<sup>[11]</sup>

Data for **11**: Yellowish oil; <sup>1</sup>H NMR (500 MHz, D<sub>2</sub>O) δ 4.37 (qd, *J* = 6.6, 3.5 Hz, 1H; H<sub>3</sub>), 4.11 (d, *J* = 3.7 Hz, 1H; H<sub>2</sub>), 1.30 (d, *J* = 6.7 Hz, 3H; H<sub>4</sub>). <sup>13</sup>C NMR (126 MHz, D<sub>2</sub>O) δ 169.7 (C1), 65.3 (C3), 58.1 (C2), 17.2 (C4). HRMS (ESI<sup>+</sup>): *m/z* calcd for C<sub>4</sub>H<sub>10</sub>NO<sub>3</sub><sup>+</sup>: 120.06552 [*M*+H]<sup>+</sup>; found: 120.06591.

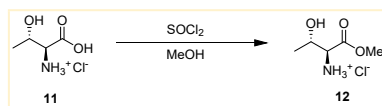

MeOH (45 mL) was cooled in an ice bath and SOCl<sub>2</sub> (3.2 mL, 44 mmol, 1.0. equiv.) was added dropwise under N<sub>2</sub> atmosphere. The resultant solution of HCl in MeOH was added to the crude L-*allo*-threonine hydrochloride (**11**) (6.76 g, 44 mmol, 1.0 equiv.) and the reaction was refluxed for 4h. Afterwards, the mixture was cooled to room temperature and concentrated under reduced pressure to yield crude L-*allo*-threonine methyl ester hydrochloride (**12**) (7.5 g) as a colorless oil, which was used in next steps without additional purification. Note: some of MeOH is still remaining after high vacuum drying.<sup>[3]</sup> NMR was consistent with the literature.<sup>[4]</sup>

Data for **12**: Yellowish oil; <sup>1</sup>H NMR (500 MHz, D<sub>2</sub>O) δ 4.39 – 4.34 (m, 1H; H<sub>3</sub>), 4.23 (d, *J* = 3.5 Hz, 1H; H<sub>2</sub>), 3.89 (s, 3H; OMe), 1.32 (d, *J* = 6.6 Hz, 3H; H<sub>4</sub>). <sup>13</sup>C NMR (126 MHz, D<sub>2</sub>O) δ 168.3 (C1), 65.6 (C3), 58.0 (C2), 53.5 (OMe), 17.7 (Ch). HRMS (ESI<sup>+</sup>): *m/z* calcd for C<sub>5</sub>H<sub>12</sub>NO<sub>3</sub><sup>+</sup>: 134.08117 [*M*+H]<sup>+</sup>; found: 134.08136.



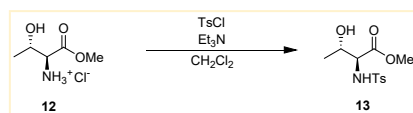

Compound **13** was prepared following slightly modified procedure of Minakata *et al.*<sup>[5]</sup> To a suspension of crude L-*allo*-threonine methyl ester hydrochloride (**12**) (1.95 g, 11.5 mmol, 1.0 equiv.) in dry CH<sub>2</sub>Cl<sub>2</sub> (40 mL) cooled in an ice bath under N<sub>2</sub> atmosphere was added Et<sub>3</sub>N (3.3 mL, 24 mmol, 2.1 equiv.) followed by addition of TsCl (2.35 g, 12.1 mmol, 1.05 equiv.) in two portions. The reaction was stirred at 1 °C for 22h. Afterwards, the solids were filtered off and the filtrate was concentrated *in vacuo*, dissolved in EtOAc (50 mL), washed with sat. NaHCO<sub>3</sub> (20 mL), aqueous HCl (20 mL, 0.1 M), H<sub>2</sub>O (20 mL), dried over Na<sub>2</sub>SO<sub>4</sub>, filtered, concentrated under reduced pressure to yield crude product as a colorless oil. The crude oil was dissolved in EtOAc/Hexane (25 mL, 2:3) and cooled in an ice bath. The formed precipitates were filtered and dried under high vacuum to yield N-tosyl-L-*allo*-threonine methyl ester (**13**) (1.5 g, 46%) as a white solid. The mother liquid was concentrated, dissolved in EtOAc/Hexane (10 mL, 1:1) and kept in the freezer (-25 °C) for 3 days. The formed solids were filtered and dried under high vacuum to yield a second portion of desired product **13** (0.72 g, 22%) as a white solid. The mother liquid was concentrated and purified using Büchi Pure C-815 Flash system (FlashPure EcoFlex Silica 12 g column, eluent: 46% : 54% EtOAc/Heptane → 100% EtOAc) to yield third portion of the compound **13** (0.40 g, 12%) Total yield: 80% (2.6 g) over three steps.

Data for **13**: White solid; *R*<sub>f</sub>=0.50 (Heptane/EtOAc 1:3); <sup>1</sup>H NMR (500 MHz, CDCl<sub>3</sub>) δ 7.75 – 7.69 (m, 2H; Ts), 7.32 – 7.27 (m, 2H; Ts), 5.57 (d, *J* = 9.0 Hz, 1H; NH), 4.09 – 4.03 (m, 1H; H<sub>3</sub>), 3.94 (dd, *J* = 8.9, 4.0 Hz, 1H; H<sub>2</sub>), 3.53 (s, 3H; OMe), 2.44 (br, 1H; OH), 2.42 (s, 3H; Ts), 1.17 (d, *J* = 6.5 Hz, 3H; H<sub>4</sub>). <sup>13</sup>C NMR (126 MHz, CDCl<sub>3</sub>) δ 170.1 (C1), 144.1 (Ts), 136.4 (Ts), 129.9 (Ts), 127.5 (Ts), 68.7 (C3), 61.0 (C2), 52.8 (OMe), 21.7 (Ts), 19.1 (C4). HRMS (ESI<sup>+</sup>): *m/z* calcd for C<sub>12</sub>H<sub>18</sub>NO<sub>5</sub>S<sup>+</sup>: 288.09002 [*M*+H]<sup>+</sup>; found: 288.09013.

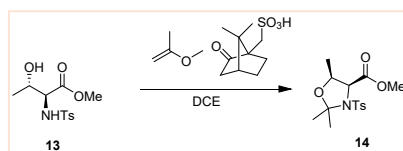

Compound **14** was prepared following slightly modified procedure of Koide *et al.*<sup>[7]</sup> N-tosyl-L-*allo*-threonine methyl ester (**13**) (2.50 g, 8.70 mmol, 1.0 equiv.) and (+)-10-Camphorsulfonic acid (40 mg, 0.17 mmol, 2 mol%) were dissolved in DCE (15 mL) under N<sub>2</sub> atmosphere and 2-methoxypropene (1.7 mL, 17 mmol, 2.0 equiv.) was added dropwise. The reaction was refluxed for 2.5h, cooled to room temperature, concentrated on silica gel and purified using Büchi Pure C-810 Flash system (FlashPure EcoFlex Silica 40 g column, eluent: 19% : 81% EtOAc/Heptane → 100% EtOAc) to yield methyl (4S,5S)-2,2,5-trimethyl-3-tosyloxazolidine-4-carboxylate (**14**) (2.63 g, 92%) as a yellowish solid.

Data for **14**: Yellowish solid; *R*<sub>f</sub>=0.37 (Heptane/EtOAc 3:1); <sup>1</sup>H NMR (500 MHz, CDCl<sub>3</sub>) δ 7.77 – 7.70 (m, 2H; Ts), 7.31 – 7.26 (m, 2H; Ts), 4.34 (p, *J* = 6.1 Hz, 1H; H<sub>3</sub>), 4.27 (d, *J* = 6.3 Hz, 1H; H<sub>2</sub>), 3.52 (s, 3H; OMe), 2.41 (s, 3H; Ts), 1.79 (s, 3H; C(CH<sub>3</sub>)<sub>2</sub>), 1.63 (s, 3H; C(CH<sub>3</sub>)<sub>2</sub>), 1.18 (d, *J* = 6.3 Hz, 3H; H<sub>4</sub>). <sup>13</sup>C NMR (126 MHz, CDCl<sub>3</sub>) δ 169.6 (C1), 143.8 (Ts), 137.6 (Ts), 129.6 (Ts), 127.7 (Ts), 98.7 (C(CH<sub>3</sub>)<sub>2</sub>), 72.8 (C3), 64.0 (C2), 52.0 (OMe), 27.9 (C(CH<sub>3</sub>)<sub>2</sub>), 26.3 (C(CH<sub>3</sub>)<sub>2</sub>), 21.6 (Ts), 15.1 (C4). HRMS (ESI<sup>+</sup>): *m/z* calcd for C<sub>15</sub>H<sub>22</sub>NO<sub>5</sub>S<sup>+</sup>: 328.12132 [*M*+H]<sup>+</sup>; found: 328.12150.

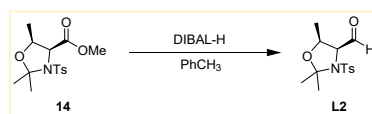

A solution of methyl (4S,5S)-2,2,5-trimethyl-3-tosyloxazolidine-4-carboxylate (**14**) (2.52 g, 7.70 mmol, 1.0 equiv.) in dry PhCH<sub>3</sub> (50 mL) was cooled to -78 °C under N<sub>2</sub> atmosphere and DIBAL-H (8.8 mL, 25%, 13 mmol, 1.7 equiv.) in PhCH<sub>3</sub> was added dropwise over 20 min. The reaction was stirred at -78 °C for 3h and subsequently quenched with MeOH (1.5 mL). The quenched reaction mixture was diluted with Et<sub>2</sub>O (30 mL), sat. Rochelle's salt (50 mL) and H<sub>2</sub>O (100 mL). The water layer was extracted three times with EtOAc (50 mL). The combined organic layers were washed once with H<sub>2</sub>O (30 mL), once with brine (30 mL), dried over Na<sub>2</sub>SO<sub>4</sub>, filtered, concentrated and purified using Büchi Pure C-810 Flash system (FlashPure EcoFlex Silica 40 g column, eluent: 21% : 79% EtOAc/Heptane → 100% EtOAc) to yield aldehyde **L2** (1.97 g, 86%) as an off-white solid.

Data for **L2**: Off-white solid; *R*<sub>f</sub>=0.34 (Heptane/EtOAc 3:1); <sup>1</sup>H NMR (500 MHz, CDCl<sub>3</sub>) δ 9.43 (d, *J* = 4.5 Hz, 1H; H1), 7.75 – 7.66 (m, 2H; Ts), 7.30 (d, *J* = 8.2 Hz, 2H; Ts), 4.29 (p, *J* = 6.3 Hz, 1H; H<sub>3</sub>), 3.83 (dd, *J* = 6.6, 4.6 Hz, 1H; H<sub>2</sub>), 2.42 (s, 3H; Ts), 1.84 (s, 3H; C(CH<sub>3</sub>)<sub>2</sub>), 1.60 (s, 3H; C(CH<sub>3</sub>)<sub>2</sub>), 1.22 (d, *J* = 6.6 Hz, 3H; H<sub>4</sub>). <sup>13</sup>C NMR (126 MHz, CDCl<sub>3</sub>) δ 200.5 (C1), 144.3 (Ts), 137.2 (Ts), 130.0 (Ts), 127.7 (Ts), 98.6 (C(CH<sub>3</sub>)<sub>2</sub>), 73.6 (C3), 68.3 (C2), 29.5 (C(CH<sub>3</sub>)<sub>2</sub>), 25.4 (C(CH<sub>3</sub>)<sub>2</sub>), 21.7 (Ts), 15.1 (C4). HRMS (ESI<sup>+</sup>): *m/z* calcd for C<sub>14</sub>H<sub>20</sub>NO<sub>4</sub>S<sup>+</sup>: 298.11076 [*M*+H]<sup>+</sup>; found: 298.11093

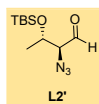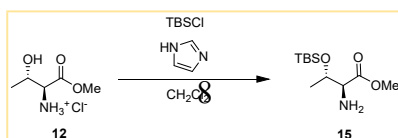



Crude *L*-allo-threonine methyl ester hydrochloride (**12**) (1.04 g, 6.11 mmol, 1.0 equiv.) was dispersed in CH<sub>2</sub>Cl<sub>2</sub> and evaporated. The procedure was repeated once more. Then, Ester **12** was suspended in dry CH<sub>2</sub>Cl<sub>2</sub> (20 mL) under N<sub>2</sub> atmosphere and imidazole (1.25 g, 18.3 mmol, 3.0 equiv.) was added. After 1h, TBSCl (1.0 g, 6.7 mmol, 1.1 equiv.) was added in one portion and the reaction was stirred at room temperature for 22h. Afterwards, the mixture was concentrated under reduced pressure and the residue was dissolved in H<sub>2</sub>O/EtOAc (60 mL; 1:1). The water layer was additionally extracted twice with EtOAc (30 mL). The combined organic layers were dried over Na<sub>2</sub>SO<sub>4</sub>, filtered, concentrated and purified using Büchi Pure C-815 Flash system (FlashPure EcoFlex Silica 25 g column, eluent: 29% : 71% EtOAc/Heptane → 100% EtOAc). Fractions with the product were concentrated, co-evaporated twice with CHCl<sub>3</sub> and dried each time for 0.5h at 40 °C, 50 mbar to yield methyl *O*-(*tert*-butyldimethylsilyl)-*L*-allo-threoninate (**15**) (1.05 g, 70% over three steps) as a yellowish liquid oil.

Data for **15**: Yellowish liquid oil; *R*<sub>f</sub>=0.55 (EtOAc); <sup>1</sup>H NMR (500 MHz, CDCl<sub>3</sub>) δ 4.03 (qd, *J* = 6.2, 4.7 Hz, 1H; H3), 3.71 (s, 3H; OMe), 3.48 (d, *J* = 4.9 Hz, 1H; H2), 1.57 (br, 2H; NH<sub>2</sub>), 1.13 (d, *J* = 6.1 Hz, 3H; H4), 0.87 (s, 9H; TBS), 0.07 (s, 3H; TBS), 0.06 (s, 3H; TBS). <sup>13</sup>C NMR (126 MHz, CDCl<sub>3</sub>) δ 174.0 (C1), 70.5 (C3), 61.1 (C2), 51.9 (OMe), 25.8 (TBS), 18.9 (C4), 18.1 (TBS), -4.3 (TBS), -4.9 (TBS). HRMS (ESI+): *m/z* calcd for C<sub>11</sub>H<sub>26</sub>NO<sub>3</sub>Si<sup>+</sup>: 248.16765 [*M*+H]<sup>+</sup>; found: 248.16783.

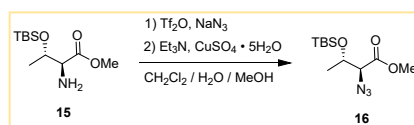

Compound **16** was prepared following adopted procedure from Nicolaou *et al.*<sup>[12]</sup> Tf<sub>2</sub>O (1.6 mL, 9.4 mmol, 3.0 equiv.) was added dropwise to a solution of NaN<sub>3</sub> (1.23 g, 18.6 mmol, 6.0 equiv.) in CH<sub>2</sub>Cl<sub>2</sub>/H<sub>2</sub>O (6 mL, 1:1) at 0 °C. The reaction was stirred at 0 °C for 2h and sat. NaHCO<sub>3</sub> (3 mL) was added. The layers were separated, and the water layer was additionally extracted twice with CH<sub>2</sub>Cl<sub>2</sub> (3 mL). The combined organic layers were washed once with sat. NaHCO<sub>3</sub> (3 mL). Formed solution of TfN<sub>3</sub> solution in CH<sub>2</sub>Cl<sub>2</sub> was added to a solution of methyl *O*-(*tert*-butyldimethylsilyl)-*L*-allo-threoninate (**15**) (0.769 g, 3.11 mmol, 1.0 equiv.) in MeOH (25 mL) and H<sub>2</sub>O (8 mL), followed by addition of Et<sub>3</sub>N (1.3 mL, 9.3 mmol, 3.0 equiv.) and CuSO<sub>4</sub>·5H<sub>2</sub>O (39 mg, 0.16 mmol, 5 mol%) at room temperature. The mixture was stirred at room temperature for 1.5h and volatiles were removed *in vacuo*. The residual aqueous layer was extracted three times with EtOAc (10 mL). The combined organic layers were washed once with brine (10 mL), dried over Na<sub>2</sub>SO<sub>4</sub>, filtered, concentrated on silica gel and purified using Büchi Pure C-815 Flash system (FlashPure EcoFlex Silica 12 g column, eluent: 3% : 97% EtOAc/Heptane → 100% EtOAc). Fractions with the product were concentrated, co-evaporated twice with CHCl<sub>3</sub> and dried each time for 20 min at 40 °C, 50 mbar to yield methyl (2*S*,3*S*)-2-azido-3-((*tert*-butyldimethylsilyl)oxy)butanoate (**16**) (0.67 g, 79%) as a colorless oil.

Data for **16**: Colorless oil; *R*<sub>f</sub>=0.51 (Heptane/EtOAc 10:1); <sup>1</sup>H NMR (500 MHz, CDCl<sub>3</sub>) δ 4.23 (qd, *J* = 6.1, 5.4 Hz, 1H; H3), 3.85 (d, *J* = 5.5 Hz, 1H; H2), 3.77 (s, 3H; OMe), 1.24 (d, *J* = 6.1 Hz, 3H; H4), 0.88 (s, 9H; TBS), 0.09 (s, 3H; TBS), 0.08 (s, 3H; TBS). <sup>13</sup>C NMR (126 MHz, CDCl<sub>3</sub>) δ 169.2 (C1), 69.8 (C3), 68.1 (C2), 52.6 (OMe), 25.7 (TBS), 19.9 (C4), 18.0 (TBS), -4.3 (TBS), -5.0 (TBS). HRMS (ESI+): *m/z* calcd for C<sub>11</sub>H<sub>23</sub>N<sub>3</sub>O<sub>3</sub>SiNa<sup>+</sup>: 296.14009 [*M*+H]<sup>+</sup>; found: 296.14088

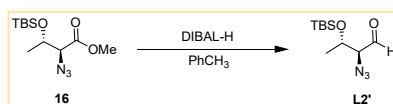

A solution of methyl (2*S*,3*S*)-2-azido-3-((*tert*-butyldimethylsilyl)oxy)butanoate (**16**) (0.562 g, 2.06 mmol, 1.0 equiv.) in dry PhCH<sub>3</sub> (8 mL) was cooled to -78 °C under N<sub>2</sub> atmosphere and DIBAL-H (1.9 mL, 25%, 13 mmol, 1.1 equiv.) in PhCH<sub>3</sub> was added dropwise over 10 min. The reaction was stirred at -78 °C for 2h and subsequently quenched with MeOH (1.5 mL). The quenched reaction mixture was diluted with EtOAc (30 mL) and sat. Rochelle's salt (30 mL). The water layer was additionally extracted twice with EtOAc (50 mL). The combined organic layers were washed once with H<sub>2</sub>O (30 mL), once with brine (30 mL), dried over Na<sub>2</sub>SO<sub>4</sub>, filtered, concentrated *in vacuo*, co-evaporated twice with CHCl<sub>3</sub> and dried each time for 20 min at 40 °C, 50 mbar to yield crude (2*S*,3*S*)-2-azido-3-((*tert*-butyldimethylsilyl)oxy)butanal (**L2'**) (0.50 g, quantitatively) as a yellowish oil, which was used in next steps without additional purification.

Note: Due to stability issues of the aldehyde **L2'**, it was not possible to obtain HRMS, and it should be used in the next step as soon as possible.

Data for **L2'**: Yellowish oil; *R*<sub>f</sub>=0.34 (Heptane/EtOAc 10:1); <sup>1</sup>H NMR (500 MHz, CDCl<sub>3</sub>) δ 9.59 (d, *J* = 1.3 Hz, 1H; H1), 4.22 (qd, *J* = 6.3, 4.6 Hz, 1H; H3), 3.86 (dd, *J* = 4.6, 1.3 Hz, 1H; H2), 1.28 (d, *J* = 6.3 Hz, 3H; H4), 0.89 (s, 9H; TBS), 0.10 (s, 6H; TBS). <sup>13</sup>C NMR (126 MHz, CDCl<sub>3</sub>) δ 197.9 (C1), 73.0 (C2), 69.8 (C3), 25.8 (TBS), 20.4 (C4), 18.0 (TBS), -4.3 (TBS), -4.9 (TBS).

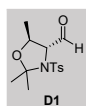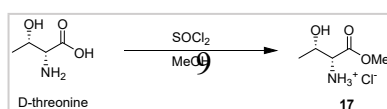

MeOH (85 mL) was cooled in an ice bath and  $\text{SOCl}_2$  (6.0 mL, 82 mmol, 1.0 equiv.) was added dropwise under  $\text{N}_2$  atmosphere. To the resultant solution of HCl in MeOH, D-threonine (10.0 g, 84.0 mmol, 1.0 equiv.) was added in one portion and the reaction was refluxed for 4h. Afterwards, the mixture was cooled to room temperature and concentrated under reduced pressure to yield crude D-threonine methyl ester hydrochloride (**17**) (14.8 g) as a colorless oil, which was used in next steps without additional purification. Note: some of MeOH is still remaining after high vacuum drying.<sup>[3]</sup>

$^1\text{H}$  NMR (500 MHz,  $\text{D}_2\text{O}$ )  $\delta$  4.49 – 4.42 (m, 1H; H3), 4.14 (d,  $J$  = 2.6 Hz, 1H; H2), 3.89 (s, 3H; OMe), 1.36 (d,  $J$  = 6.7 Hz, 3H; H4).  $^{13}\text{C}$  NMR (126 MHz,  $\text{D}_2\text{O}$ )  $\delta$  169.2 (C1), 65.2 (C3), 58.4 (C2), 53.7 (OMe), 18.8 (C4). HRMS (ESI+):  $m/z$  calcd for  $\text{C}_5\text{H}_{12}\text{NO}_3^+$ : 134.08117  $[M+\text{H}]^+$ ; found: 134.08134.

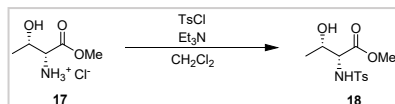

Compound **18** was prepared following adopted procedure from Minakata *et al.*<sup>[5]</sup> To a suspension of crude D-threonine methyl ester hydrochloride (**17**) (3.35 g, 25.2 mmol, 1.0 equiv.) in dry  $\text{CH}_2\text{Cl}_2$  (50 mL) cooled in an ice bath under  $\text{N}_2$  atmosphere was added  $\text{Et}_3\text{N}$  (7.0 mL, 50 mmol, 2.0 equiv.) followed by addition of  $\text{TsCl}$  (5.04 g, 26.4 mmol, 1.05 equiv.). The reaction was stirred at 0 °C for 16h. Afterwards, the solids were filtered off and the filtrate was concentrated *in vacuo*, dissolved in EtOAc, washed with sat.  $\text{NaHCO}_3$ , brine, dried over  $\text{MgSO}_4$ , filtered, concentrated under reduced pressure to yield crude product as an off-white solid. The crude was recrystallized from EtOAc/Heptane (1:1) to give N-tosyl-D-threonine methyl ester (**18**) (5.72 g, 79%) as a white solid.

Data for **18**: White solid;  $^1\text{H}$  NMR (500 MHz,  $\text{CDCl}_3$ )  $\delta$  7.75 – 7.66 (m, 2H; Ts), 7.34 – 7.27 (m, 2H; Ts), 5.39 (d,  $J$  = 9.5 Hz, 1H; NH), 4.19 – 4.08 (m, 1H; H3), 3.82 (dd,  $J$  = 9.6, 3.2 Hz, 1H; H2), 3.52 (s, 3H; OMe), 2.42 (s, 3H; Ts), 1.91 (br, 1H; OH), 1.27 (d,  $J$  = 6.5 Hz, 3H; H4).  $^{13}\text{C}$  NMR (126 MHz,  $\text{CDCl}_3$ )  $\delta$  170.8 (C1), 143.9 (Ts), 136.8 (Ts), 129.8 (Ts), 127.4 (Ts), 68.5 (C3), 61.0 (C2), 52.8 (OMe), 21.7 (Ts), 20.0 (C4). HRMS (ESI+):  $m/z$  calcd for  $\text{C}_{12}\text{H}_{18}\text{NO}_5\text{S}^+$ : 288.09002  $[M+\text{H}]^+$ ; found: 288.09005.

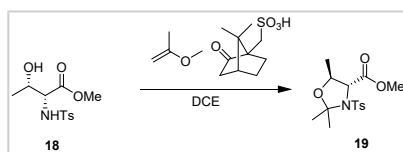

Compound **19** was prepared following adopted procedure from Koide *et al.*<sup>[7]</sup> N-tosyl-D-threonine methyl ester (**18**) (2.00 g, 6.96 mmol, 1.0 equiv.) and (+)-10-camphorsulfonic acid (32 mg, 0.13 mmol, 2 mol%) were dissolved in DCE (15 mL) under  $\text{N}_2$  atmosphere and 2-methoxypropene (1.3 mL, 14 mmol, 2.0 equiv.) was added dropwise. The reaction was refluxed for 2h, cooled to room temperature, concentrated and purified using Büchi Pure C-815 Flash system (FlashPure EcoFlex Silica 25 g column, eluent: 5% : 95% EtOAc/Heptane → 100% EtOAc) to yield methyl (4R,5S)-2,2,5-trimethyl-3-tosyloxazolidine-4-carboxylate (**19**) (2.10 g, 92%) as a yellow oil.

Data for **19**: Yellow oil;  $R_f$ =0.35 (Heptane/EtOAc 3:1);  $^1\text{H}$  NMR (500 MHz,  $\text{CDCl}_3$ )  $\delta$  7.81 – 7.72 (m, 2H; Ts), 7.35 – 7.27 (m, 2H; Ts), 4.30 (dq,  $J$  = 7.6, 6.1 Hz, 1H; H3), 3.92 (d,  $J$  = 7.6 Hz, 1H; H2), 3.79 (s, 3H; OMe), 2.42 (s, 3H; Ts), 1.60 (s, 3H;  $\text{C}(\text{CH}_3)_2$ ), 1.53 (s, 3H;  $\text{C}(\text{CH}_3)_2$ ), 1.32 (d,  $J$  = 6.0 Hz, 3H; H4).  $^{13}\text{C}$  NMR (126 MHz,  $\text{CDCl}_3$ )  $\delta$  170.9 (C1), 143.8 (Ts), 137.8 (Ts), 129.7 (Ts), 127.8 (Ts), 98.2 ( $\text{C}(\text{CH}_3)_2$ ), 74.7 (C3), 67.4 (C2), 53.0 (OMe), 28.1 ( $\text{C}(\text{CH}_3)_2$ ), 26.4 ( $\text{C}(\text{CH}_3)_2$ ), 21.7 (Ts), 18.7 (C4). HRMS (ESI+):  $m/z$  calcd for  $\text{C}_{15}\text{H}_{22}\text{NO}_5\text{S}^+$ : 328.12132  $[M+\text{H}]^+$ ; found: 328.12160.

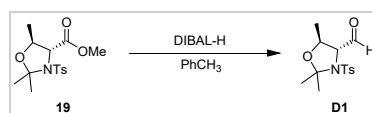

A solution of methyl (4R,5S)-2,2,5-trimethyl-3-tosyloxazolidine-4-carboxylate (**19**) (1.06 g, 3.25 mmol, 1.0 equiv.) in dry  $\text{PhCH}_3$  (20 mL) was cooled to -78 °C under  $\text{N}_2$  atmosphere and DIBAL-H (4.6 mL, 1.2 M, 5.5 mmol, 1.7 equiv.) in  $\text{PhCH}_3$  was added dropwise over 10 min. The reaction was stirred at -78 °C for 3h and subsequently quenched with MeOH (1.0 mL). The quenched reaction mixture was diluted with  $\text{Et}_2\text{O}$  (15 mL), sat. Rochelle's salt (25 mL) and  $\text{H}_2\text{O}$  (50 mL). The water layer was extracted three times with EtOAc (25 mL). The combined organic layers were washed once with  $\text{H}_2\text{O}$  (15 mL), once with brine (15 mL), dried over  $\text{Na}_2\text{SO}_4$ , filtered and concentrated. The resulting solid was dissolved in  $\text{Et}_2\text{O}$ /Heptane (30 mL, 5:1) and left overnight in the freezer (-25 °C). The formed precipitates were filtered, dried under high vacuum to yield (4R,5S)-2,2,5-trimethyl-3-tosyloxazolidine-4-carbaldehyde (**D1**) (0.75 g, 78%) as white crystals.

Data for **D1**: White solid;  $R_f$ =0.42 (Heptane/EtOAc 3:1);  $^1\text{H}$  NMR (500 MHz,  $\text{CDCl}_3$ )  $\delta$  9.58 (d,  $J$  = 4.6 Hz, 1H; H1), 7.70 – 7.62 (m, 2H; Ts), 7.32 (d,  $J$  = 8.2 Hz, 2H; Ts), 4.22 (dq,  $J$  = 8.4, 6.1 Hz, 1H; H3), 3.50 (dd,  $J$  = 8.3, 4.5 Hz, 1H; H2), 2.44 (s, 3H; Ts), 1.67 (s, 3H;  $\text{C}(\text{CH}_3)_2$ ), 1.50 (s, 3H;  $\text{C}(\text{CH}_3)_2$ ), 1.27 (d,  $J$  = 6.0 Hz, 3H; H4).  $^{13}\text{C}$  NMR (126 MHz,  $\text{CDCl}_3$ )  $\delta$  197.2 (C1), 144.2 (Ts), 136.9 (Ts), 130.0

(Ts), 127.7 (Ts), 98.3 (C(CH<sub>3</sub>)<sub>2</sub>), 72.4 (C2), 70.5 (C3), 29.0 (C(CH<sub>3</sub>)<sub>2</sub>), 25.7 (C(CH<sub>3</sub>)<sub>2</sub>), 21.7 (Ts), 17.4 (C4). HRMS (ESI<sup>+</sup>): *m/z* calcd for C<sub>14</sub>H<sub>19</sub>NO<sub>4</sub>Na<sup>+</sup>: 320.09270 [*M*+Na]<sup>+</sup>; found: 320.09313

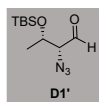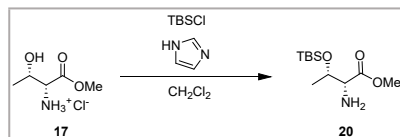

Crude D-threonine methyl ester hydrochloride (**17**) (7.12 g, 42.0 mmol, 1.0 equiv.) was dispersed in CH<sub>2</sub>Cl<sub>2</sub> and evaporated. The procedure was repeated once more. Then, Ester **17** was suspended in dry CH<sub>2</sub>Cl<sub>2</sub> (140 mL) under N<sub>2</sub> atmosphere and imidazole (8.57 g, 126 mmol, 3.0 equiv.) was added. After 1h, TBSCl (7.2 g, 46 mmol, 1.1 equiv.) was added in one portion and the reaction was stirred at room temperature for 22h. Afterwards, the mixture was concentrated under reduced pressure and the residue was dissolved in H<sub>2</sub>O/EtOAc (200 mL; 1:1). The water layer was additionally extracted twice with EtOAc (100 mL). The combined organic layers were dried over Na<sub>2</sub>SO<sub>4</sub>, filtered, concentrated and purified using Büchi Pure C-815 Flash system (FlashPure EcoFlex Silica 40 g column, eluent: 62% : 38% EtOAc/Heptane → 100% EtOAc). Fractions with the product were concentrated, co-evaporated twice with CHCl<sub>3</sub> and dried each time for 0.5h at 40 °C, 50 mbar to yield methyl O-(*tert*-butyldimethylsilyl)-D-threoninate (**20**) (7.28 g, 70% over two steps) as a colorless oil. NMR was consistent with the literature.<sup>[13]</sup>

Data for **20**: Colorless oil; *R*<sub>f</sub>=0.38 (Heptane/EtOAc 1:3); <sup>1</sup>H NMR (500 MHz, CDCl<sub>3</sub>) δ 4.29 (qd, *J* = 6.3, 2.7 Hz, 1H; H3), 3.71 (s, 3H; OMe), 3.28 (d, *J* = 2.7 Hz, 1H; 2), 1.61 (s, 2H; NH<sub>2</sub>), 1.24 (d, *J* = 6.3 Hz, 3H; H4), 0.84 (s, 9H; TBS), 0.04 (s, 3H; TBS), -0.02 (s, 3H; TBS). <sup>13</sup>C NMR (126 MHz, CDCl<sub>3</sub>) δ 175.1 (C1), 69.6 (C3), 60.9 (C2), 52.0 (OMe), 25.8 (TBS), 21.0 (C4), 18.0 (TBS), -4.2 (TBS), -5.1 (TBS). HRMS (ESI<sup>+</sup>): *m/z* calcd for C<sub>11</sub>H<sub>26</sub>NO<sub>3</sub>Si<sup>+</sup>: 248.16765 [*M*+H]<sup>+</sup>; found: 248.16787.

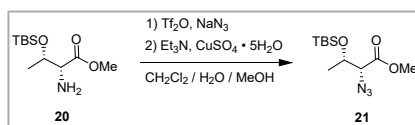

Compound **21** was prepared following adopted procedure from Nicolaou *et al.*<sup>[12]</sup> Tf<sub>2</sub>O (2.10 mL, 12.4 mmol, 3.0 equiv.) was added dropwise to a solution of NaN<sub>3</sub> (1.58 g, 24.3 mmol, 6.0 equiv.) in CH<sub>2</sub>Cl<sub>2</sub>/H<sub>2</sub>O (8 mL, 1:1) at 0 °C. The reaction was stirred at 0 °C for 2h and sat. NaHCO<sub>3</sub> (5 mL) was added. The layers were separated, and the water layer was additionally extracted twice with CH<sub>2</sub>Cl<sub>2</sub> (3 mL). The combined organic layers were washed once with sat. NaHCO<sub>3</sub> (3 mL). Formed solution of TfN<sub>3</sub> solution in CH<sub>2</sub>Cl<sub>2</sub> was added to a solution of methyl O-(*tert*-butyldimethylsilyl)-D-threoninate (**20**) (1.00 g, 4.04 mmol, 1.0 equiv.) in MeOH (33 mL) and H<sub>2</sub>O (10 mL), followed by addition of Et<sub>3</sub>N (1.7 mL, 12 mmol, 3.0 equiv.) and CuSO<sub>4</sub>·5H<sub>2</sub>O (50 mg, 0.20 mmol, 5 mol%) at room temperature. The mixture was stirred at room temperature for 1.5h and volatiles were removed *in vacuo*. The residual aqueous layer was extracted three times with EtOAc (15 mL). The combined organic layers were washed once with brine (10 mL), dried over Na<sub>2</sub>SO<sub>4</sub>, filtered, concentrated on silica gel and purified using Büchi Pure C-815 Flash system (FlashPure EcoFlex Silica 25 g column, eluent: 3% : 97% EtOAc/Heptane → 100% EtOAc). Fractions with the product were concentrated, co-evaporated twice with CHCl<sub>3</sub> and dried each time for 0.5h at 40 °C, 50 mbar to yield methyl (2*R*,3*S*)-2-azido-3-((*tert*-butyldimethylsilyl)oxy)butanoate (**21**) (0.75 g, 67%) as a colorless oil. NMR was consistent with the literature.<sup>[14]</sup>

Note: Due to the sensitivity of the compound **21**, it was not possible to obtain HRMS.

Data for **21**: Colorless oil; *R*<sub>f</sub>=0.39 (Heptane/EtOAc 10:1); <sup>1</sup>H NMR (500 MHz, CDCl<sub>3</sub>) δ 4.46 (qd, *J* = 6.3, 2.8 Hz, 1H; H3), 3.80 (s, 3H; OMe), 3.39 (d, *J* = 2.8 Hz, 1H; H2), 1.32 (d, *J* = 6.3 Hz, 3H; H4), 0.87 (s, 9H; TBS), 0.08 (s, 3H; TBS), 0.03 (s, 3H; TBS). <sup>13</sup>C NMR (126 MHz, CDCl<sub>3</sub>) δ 170.0 (C1), 70.8 (C3), 67.2 (C2), 52.6 (OMe), 25.6 (TBS), 21.2 (C4), 17.9 (TBS), -4.3 (TBS), -5.2 (TBS).

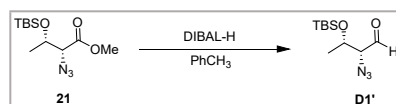

A solution of methyl (2*R*,3*S*)-2-azido-3-((*tert*-butyldimethylsilyl)oxy)butanoate (**21**) (0.406 g, 1.49 mmol, 1.0 equiv.) in dry PhCH<sub>3</sub> (6 mL) was cooled to -78 °C under N<sub>2</sub> atmosphere and DIBAL-H (1.4 mL, 1.2 M, 1.7 mmol, 1.1 equiv.) in PhCH<sub>3</sub> was added dropwise over 10 min. The reaction was stirred at -78 °C for 2h and subsequently quenched with MeOH (1.5 mL). The quenched reaction mixture was diluted with EtOAc (20 mL) and sat. Rochelle's salt (20 mL). The water layer was additionally extracted twice with EtOAc (20 mL). The combined organic layers were washed once with H<sub>2</sub>O (20 mL), once with brine (20 mL), dried over Na<sub>2</sub>SO<sub>4</sub>, filtered, concentrated *in vacuo*, co-evaporated twice with CHCl<sub>3</sub> and dried each time for 20 min at 40 °C, 50 mbar to yield crude (2*R*,3*S*)-2-azido-3-((*tert*-butyldimethylsilyl)oxy)butanal (**D1'**) (0.35 g, 95%) as a yellowish oil, which was used in next steps without additional purification.

Note: Due to stability issues of the aldehyde **D1'**, it was not possible to obtain HRMS, and it should be used in the next step as soon as possible.

Data for **D1'**: Yellowish oil;  $R_f$ =0.33 (Heptane/EtOAc 10:1);  $^1\text{H}$  NMR (500 MHz,  $\text{CDCl}_3$ )  $\delta$  9.70 (s, 1H; H1), 4.46 (qd,  $J$  = 6.3, 3.4 Hz, 1H; H3), 3.53 (d,  $J$  = 3.5 Hz, 1H; H2), 1.33 (d,  $J$  = 6.3 Hz, 3H; H4), 0.87 (s, 9H; TBS), 0.10 (s, 3H; TBS), 0.07 (s, 3H; TBS).  $^{13}\text{C}$  NMR (126 MHz,  $\text{CDCl}_3$ )  $\delta$  197.7 (C1), 72.6 (C2), 68.9 (C3), 25.7 (TBS), 20.8 (C4), 18.0 (TBS), -4.2 (TBS), -5.0 (TBS).

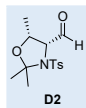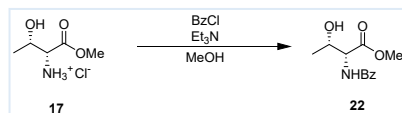

Compound **22** was prepared following adopted procedure from Tanner *et al.*<sup>[8]</sup> The crude *D*-threonine methyl ester hydrochloride (**17**) (11.2 g, 66.3 mmol, 1.0 equiv.) was dissolved in dry MeOH (40 mL) under  $\text{N}_2$  atmosphere and  $\text{Et}_3\text{N}$  (28.0 mL, 200 mmol, 3.0 equiv.) was added dropwise. After 15 min, the reaction mixture was cooled in an ice bath and BzCl (8.5 mL, 72 mmol, 1.1 equiv.) was added dropwise. The reaction was stirred at 0 °C for 3h. Afterwards, the mixture was concentrated, diluted with  $\text{H}_2\text{O}$  (50 mL) and extracted three times with EtOAc (40 mL). The combined organic layers were washed once with  $\text{H}_2\text{O}$  (20 mL), once with brine (10 mL), dried over  $\text{Na}_2\text{SO}_4$ , filtered and concentrated to give yellowish oil. The oil was dissolved in  $\text{Et}_2\text{O}$  (30 mL) and kept in the freezer (-25 °C) overnight. The formed solids were filtered and dried under high vacuum to yield *N*-benzoyl-*D*-threonine methyl ester (**22**) (12.9 g, 82% over two steps) as off-white solid.

Data for **22**: Off-white solid;  $R_f$ =0.45 (Heptane/EtOAc 1:3);  $^1\text{H}$  NMR (500 MHz,  $\text{CDCl}_3$ )  $\delta$  7.88 – 7.79 (m, 2H; Bz), 7.55 – 7.48 (m, 1H; Bz), 7.47 – 7.40 (m, 2H; Bz), 7.00 (d,  $J$  = 8.7 Hz, 1H; NH), 4.82 (dd,  $J$  = 8.8, 2.5 Hz, 1H; H2), 4.45 (qd,  $J$  = 6.4, 2.5 Hz, 1H; H3), 3.78 (s, 3H; OMe), 2.57 (br, 1H; OH), 1.28 (d,  $J$  = 6.4 Hz, 3H; H4).  $^{13}\text{C}$  NMR (126 MHz,  $\text{CDCl}_3$ )  $\delta$  171.8 (C1), 168.1 (Bz), 133.8 (Bz), 132.1 (Bz), 128.8 (Bz), 127.3 (Bz), 68.4 (C3), 57.7 (C2), 52.8 (OMe), 20.2 (C4). HRMS (ESI<sup>+</sup>):  $m/z$  calcd for  $\text{C}_{12}\text{H}_{16}\text{NO}_4$ <sup>+</sup>: 238.10738 [ $M+\text{H}$ ]<sup>+</sup>; found: 238.10817.

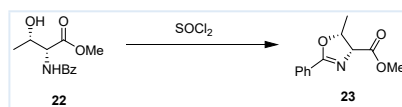

Compound **23** was prepared following adopted procedure from Sulikowski *et al.*<sup>[9]</sup> To  $\text{SOCl}_2$  (38.0 mL, 522 mmol, 10.5 equiv.) at 0 °C under  $\text{N}_2$  atmosphere, *N*-benzoyl-*D*-threonine methyl ester (**22**) (11.8 g, 49.7 mmol, 1.0 equiv.) was added in three portions. The reaction was stirred at 1 °C for 5 days. Afterwards, the mixture was concentrated, dissolved in  $\text{CH}_2\text{Cl}_2$ , slowly poured into sat.  $\text{NaHCO}_3$  (100 mL) and extracted three times with  $\text{CH}_2\text{Cl}_2$  (50 mL). The combined organic layers were washed once with  $\text{H}_2\text{O}$  (50 mL), once with brine (20 mL), dried over  $\text{Na}_2\text{SO}_4$ , filtered, concentrated and purified using Büchi Pure C-815 Flash system (FlashPure EcoFlex Silica 40 g column, eluent: 32% : 68% EtOAc/Heptane → 100% EtOAc) to yield methyl (4*R*,5*R*)-5-methyl-2-phenyl-4,5-dihydrooxazole-4-carboxylate (**23**) (9.07 g, 83 %) as a yellowish oil.

Data for **23**: Yellowish oil;  $R_f$ =0.52 (Heptane/EtOAc 1:1);  $^1\text{H}$  NMR (500 MHz,  $\text{CDCl}_3$ )  $\delta$  8.01 – 7.91 (m, 2H; Ph), 7.51 – 7.45 (m, 1H; Ph), 7.42 – 7.35 (m, 2H; Ph), 5.05 (dq,  $J$  = 10.1, 6.4 Hz, 1H; H3), 4.97 (d,  $J$  = 10.2 Hz, 1H; H2), 3.76 (s, 3H; OMe), 1.37 (d,  $J$  = 6.5 Hz, 3H; H4).  $^{13}\text{C}$  NMR (126 MHz,  $\text{CDCl}_3$ )  $\delta$  170.5 (C1), 166.2 (PhC(O)N), 131.9 (Ph), 128.6 (Ph), 128.4 (Ph), 127.3 (Ph), 77.7 (C3), 71.8 (C2), 52.2 (OMe), 16.3 (C4). HRMS (ESI<sup>+</sup>):  $m/z$  calcd for  $\text{C}_{12}\text{H}_{14}\text{NO}_3$ <sup>+</sup>: 220.09682 [ $M+\text{H}$ ]<sup>+</sup>; found: 220.09685.

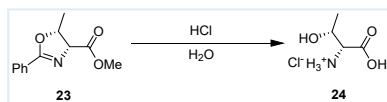

Compound **24** was prepared following adopted procedure from Sulikowski *et al.*<sup>[9]</sup> Methyl (4*R*,5*R*)-5-methyl-2-phenyl-4,5-dihydrooxazole-4-carboxylate (**23**) (8.11 g, 37.0 mmol, 1.0 equiv.) was suspended in  $\text{H}_2\text{O}$  (50 mL) and HCl (42 mL, 37%, 0.51 mol, 14 equiv.) was added via syringe. The reaction mixture was refluxed for 5h. Afterwards, the mixture was cooled to room temperature and washed three times with  $\text{Et}_2\text{O}$  (50 mL). The aqueous layer was concentrated *in vacuo* to give *D*-*allo*-threonine hydrochloride (**24**) (5.8 g, quantitatively) as a yellowish foam, which was used in the next steps without additional purifications.

Data for **24**: Yellowish foam;  $^1\text{H}$  NMR (500 MHz,  $\text{D}_2\text{O}$ )  $\delta$  4.36 (qd,  $J$  = 6.6, 3.5 Hz, 1H; H3), 4.13 (d,  $J$  = 3.5 Hz, 1H; H2), 1.30 (d,  $J$  = 6.6 Hz, 3H; H4).  $^{13}\text{C}$  NMR (126 MHz,  $\text{D}_2\text{O}$ )  $\delta$  169.5 (C1), 65.3 (C3), 57.9 (C2), 17.3 (C4). HRMS (ESI<sup>+</sup>):  $m/z$  calcd for  $\text{C}_4\text{H}_{10}\text{NO}_3$ <sup>+</sup>: 120.06552 [ $M+\text{H}$ ]<sup>+</sup>; found: 120.06596.

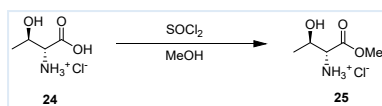

MeOH (35 mL) was cooled in an ice bath and  $\text{SOCl}_2$  (2.5 mL, 34 mmol, 1.0 equiv.) was added dropwise under  $\text{N}_2$  atmosphere. The resultant solution of HCl in MeOH was added to the crude D-*allo*-threonine hydrochloride (**24**) (5.2 g, 33.7 mmol, 1.0 equiv.) and the reaction was refluxed for 4h. Afterwards, the mixture was cooled to room temperature and concentrated under reduced pressure to yield crude D-*allo*-threonine methyl ester hydrochloride (**25**) (5.6 g, quantitatively) as a yellowish oil, which was used in next steps without additional purification. NMR was consistent with the literature.<sup>[15]</sup>

Data for **25**: Yellowish oil;  $^1\text{H}$  NMR (500 MHz,  $\text{D}_2\text{O}$ )  $\delta$  4.40 – 4.32 (m, 1H; H3), 4.26 – 4.18 (m, 1H; H2), 3.88 (s, 3H; OMe), 1.32 (d,  $J$  = 6.7 Hz, 3H; H4).  $^{13}\text{C}$  NMR (126 MHz,  $\text{D}_2\text{O}$ )  $\delta$  168.3 (C1), 65.5 (C3), 58.0 (C2), 53.5 (OMe), 17.7 (C4). HRMS (ESI+):  $m/z$  calcd for  $\text{C}_5\text{H}_{12}\text{NO}_3^+$ : 134.08117  $[M+\text{H}]^+$ ; found: 134.08167.

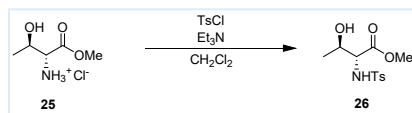

Compound **26** was prepared following adopted procedure from Minakata *et al.*<sup>[5]</sup> To a suspension of crude D-*allo*-threonine methyl ester hydrochloride (**25**) (2.45 g, 18.4 mmol, 1.0 equiv.) in dry  $\text{CH}_2\text{Cl}_2$  (25 mL) cooled in an ice bath under  $\text{N}_2$  atmosphere was added  $\text{Et}_3\text{N}$  (5.2 mL, 37 mmol, 2.0 equiv.) followed by addition of  $\text{TsCl}$  (3.68 g, 19.3 mmol, 1.05 equiv.) in one portion. The reaction was stirred at 0 °C for 23h. Afterwards, the solids were filtered off and the filtrate was concentrated *in vacuo*, suspended in sat.  $\text{NH}_4\text{Cl}$  (50 mL) and extracted three times with EtOAc (25 mL). The combined organic layers were brine (20 mL), dried over  $\text{Na}_2\text{SO}_4$ , filtered, concentrated on silica gel and using Büchi Pure C-815 Flash system (FlashPure EcoFlex Silica 40 g column, eluent: 39% : 61% EtOAc/Heptane  $\rightarrow$  100% EtOAc) to yield N-tosyl-D-*allo*-threonine methyl ester (**26**) (3.10 g, 59%) as an off-white solid.

Data for **26**: White solid;  $R_f$ =0.00 (Heptane/EtOAc 1:1);  $^1\text{H}$  NMR (500 MHz,  $\text{CDCl}_3$ )  $\delta$  7.78 – 7.66 (m, 2H; Ts), 7.30 (d,  $J$  = 8.2 Hz, 2H; Ts), 5.59 (d,  $J$  = 9.0 Hz, 1H; NH), 4.06 (qd,  $J$  = 6.5, 4.0 Hz, 1H; H3), 3.94 (dd,  $J$  = 8.9, 4.0 Hz, 1H; H2), 3.53 (s, 3H; OMe), 2.42 (s, 3H; Ts), 2.35 (br, 1H; OH), 1.17 (d,  $J$  = 6.4 Hz, 3H; H4).  $^{13}\text{C}$  NMR (126 MHz,  $\text{CDCl}_3$ )  $\delta$  170.1 (C1), 144.1 (Ts), 136.4 (Ts), 129.9 (Ts), 127.5 (Ts), 68.7 (C3), 61.0 (C2), 52.8 (OMe), 21.7 (Ts), 19.1 (C4). HRMS (ESI+):  $m/z$  calcd for  $\text{C}_{12}\text{H}_{17}\text{NO}_5\text{SNa}^+$ : 310.07196  $[M+\text{Na}]^+$ ; found: 310.07219.

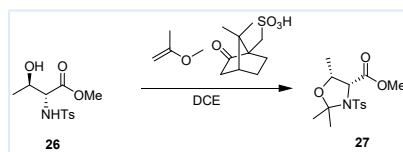

Compound **27** was prepared following adopted procedure from Koide *et al.*<sup>[7]</sup> N-tosyl-D-*allo*-threonine methyl ester (**26**) (0.50 g, 1.7 mmol, 1.0 equiv.) and (+)-10-Camphorsulfonic acid (8.8 mg, 0.038 mmol, 2 mol%) were dissolved in DCE (5 mL) under  $\text{N}_2$  atmosphere and 2-methoxypropene (0.34 mL, 3.4 mmol, 2.0 equiv.) was added dropwise. The reaction was refluxed for 2.5h, cooled to room temperature, concentrated on silica gel and purified using Büchi Pure C-810 Flash system (FlashPure EcoFlex Silica 12 g column, eluent: 19% : 81% EtOAc/Heptane  $\rightarrow$  100% EtOAc) to yield methyl (4*R*,5*R*)-2,2,5-trimethyl-3-tosyloxazolidine-4-carboxylate (**27**) (0.54 g, 95%) as a white solid.

Data for **27**: White solid;  $R_f$ =0.30 (Heptane/EtOAc 3:1);  $^1\text{H}$  NMR (500 MHz,  $\text{CDCl}_3$ )  $\delta$  7.76 – 7.68 (m, 2H; Ts), 7.31 – 7.26 (m, 2H; Ts), 4.34 (p,  $J$  = 6.3 Hz, 1H; H3), 4.27 (d,  $J$  = 6.3 Hz, 1H; H2), 3.52 (s, 3H; OMe), 2.41 (s, 3H; Ts), 1.79 (s, 3H;  $\text{C}(\text{CH}_3)_2$ ), 1.63 (s, 3H;  $\text{C}(\text{CH}_3)_2$ ), 1.18 (d,  $J$  = 6.1 Hz, 3H; H4).  $^{13}\text{C}$  NMR (126 MHz,  $\text{CDCl}_3$ )  $\delta$  169.6 (C1), 143.8 (Ts), 137.6 (Ts), 129.6 (Ts), 127.8 (Ts), 98.7 ( $\text{C}(\text{CH}_3)_2$ ), 72.8 (C3), 64.0 (C2), 52.0 (OMe), 27.9 ( $\text{C}(\text{CH}_3)_2$ ), 26.3 ( $\text{C}(\text{CH}_3)_2$ ), 21.7 (Ts), 15.1 (C4). HRMS (ESI+):  $m/z$  calcd for  $\text{C}_{15}\text{H}_{22}\text{NO}_5\text{S}^+$ : 328.12132  $[M+\text{H}]^+$ ; found: 328.12175.

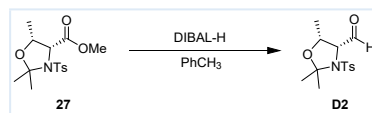

A solution of methyl (4*R*,5*R*)-2,2,5-trimethyl-3-tosyloxazolidine-4-carboxylate (**27**) (0.464 g, 1.42 mmol, 1.0 equiv.) in dry  $\text{PhCH}_3$  (10 mL) was cooled to -78 °C under  $\text{N}_2$  atmosphere and DIBAL-H (2.0 mL, 1.2 M, 2.4 mmol, 1.7 equiv.) in  $\text{PhCH}_3$  was added dropwise over 5 min. The reaction was stirred at -78 °C for 3h and subsequently quenched with MeOH (0.5 mL). The quenched reaction mixture was diluted with  $\text{Et}_2\text{O}$  (10 mL), sat. Rochelle's salt (10 mL) and  $\text{H}_2\text{O}$  (20 mL). The water layer was extracted three times with EtOAc (20 mL). The combined organic layers were washed once with  $\text{H}_2\text{O}$  (10 mL), once with brine (10 mL), dried over  $\text{Na}_2\text{SO}_4$ , filtered, concentrated and purified using Büchi Pure C-810 Flash system (FlashPure EcoFlex Silica 25 g column, eluent: 21% : 79% EtOAc/Heptane  $\rightarrow$  100% EtOAc) to yield aldehyde **D2** (0.34 g, 81%) as a white solid.

Data for **D2**: White solid;  $R_f$ =0.34 (Heptane/EtOAc 3:1);  $^1\text{H}$  NMR (500 MHz,  $\text{CDCl}_3$ )  $\delta$  9.43 (dd,  $J$  = 4.6, 0.9 Hz, 1H; H1), 7.75 – 7.68 (m, 2H; Ts), 7.32 – 7.26 (m, 2H; Ts), 4.29 (pd,  $J$  = 6.5, 0.9 Hz, 1H; H3), 3.83 (dd,  $J$  = 6.8, 4.6 Hz, 1H; H2), 2.42 (s, 3H; Ts), 1.84 (s, 3H;  $\text{C}(\text{CH}_3)_2$ ), 1.60 (s, 3H;  $\text{C}(\text{CH}_3)_2$ ), 1.22 (d,  $J$  = 6.6 Hz, 3H; H4).  $^{13}\text{C}$  NMR (126 MHz,  $\text{CDCl}_3$ )  $\delta$  200.5 (C1), 144.3 (Ts), 137.2 (Ts), 130.0



(Ts), 127.7 (Ts), 98.6 (C(CH<sub>3</sub>)<sub>2</sub>), 73.6 (C3), 68.3 (C2), 29.5 (C(CH<sub>3</sub>)<sub>2</sub>), 25.4 (C(CH<sub>3</sub>)<sub>2</sub>), 21.7 (Ts), 15.1 (C4). HRMS (ESI<sup>+</sup>): *m/z* calcd for C<sub>14</sub>H<sub>19</sub>NO<sub>4</sub>SNa<sup>+</sup>: 320.09270 [*M*+Na]<sup>+</sup>; found: 320.09310.

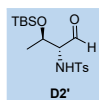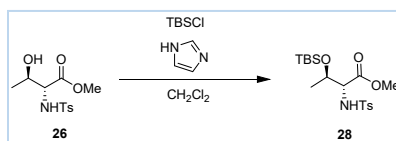

*N*-tosyl-D-*allo*-threonine methyl ester (**26**) (0.801 g, 2.79 mmol, 1.0 equiv.) and imidazole (0.385 g, 5.61 mmol, 2.0 equiv.) were dissolved in dry CH<sub>2</sub>Cl<sub>2</sub> (10 mL) under N<sub>2</sub> atmosphere, cooled in an ice bath and TBSCl (0.450 g, 1.04 mmol, 1.04 equiv.) was added in two portions. After 10 min, the ice bath was removed and the reaction was stirred at room temperature for 22h. Afterwards, the mixture was poured into DCM/H<sub>2</sub>O (70 mL, 5:2) and layers were separated. The organic layers was washed twice with H<sub>2</sub>O (20 mL), once with brine (10 mL), dried over Na<sub>2</sub>SO<sub>4</sub>, filtered, concentrated on silica gel and purified using Büchi Pure C-815 Flash system (FlashPure EcoFlex Silica 25 g column, eluent: 18% : 82% EtOAc/Heptane → 100% EtOAc) to yield methyl *O*-(*tert*-butyldimethylsilyl)-*N*-tosyl-D-*allo*-threoninate (**28**) (0.890 g, 80%) as a white solid. NMR was consistent with the literature.<sup>[16]</sup>

Data for **28**: White solid; *R*<sub>f</sub>=0.39 (Heptane/EtOAc 3:1); <sup>1</sup>H NMR (500 MHz, CDCl<sub>3</sub>) δ 7.79 – 7.61 (m, 2H; Ts), 7.28 (d, *J* = 8.2 Hz, 2H; Ts), 5.18 (d, *J* = 9.6 Hz, 1H; NH), 3.99 (qd, *J* = 6.3, 5.0 Hz, 1H; H3), 3.77 (dd, *J* = 9.6, 4.9 Hz, 1H; H2), 3.43 (s, 3H; OMe), 2.41 (s, 3H; Ts), 1.23 (d, *J* = 6.3 Hz, 3H; H4), 0.82 (s, 9H; TBS), 0.02 (s, 3H; TBS), 0.01 (s, 3H; TBS). <sup>13</sup>C NMR (126 MHz, CDCl<sub>3</sub>) δ 170.3 (C1), 143.8 (Ts), 136.9 (Ts), 129.7 (Ts), 127.4 (Ts), 70.7 (C3), 62.0 (C2), 52.2 (OMe), 25.7 (TBS), 21.6 (Ts), 20.8 (C4), 18.0 (TBS), -4.3 (TBS), -5.0 (TBS). HRMS (ESI<sup>+</sup>): *m/z* calcd for C<sub>18</sub>H<sub>32</sub>NO<sub>5</sub>SSi<sup>+</sup>: 402.17650 [*M*+H]<sup>+</sup>; found: 402.17835.

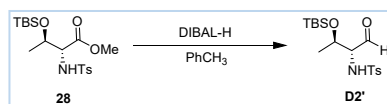

A solution of methyl *O*-(*tert*-butyldimethylsilyl)-*N*-tosyl-D-*allo*-threoninate (**28**) (0.724 g, 1.80 mmol, 1.0 equiv.) in dry PhCH<sub>3</sub> (15 mL) was cooled to -78 °C under N<sub>2</sub> atmosphere and DIBAL-H (4.6 mL, 1.2 M, 5.5 mmol, 3.0 equiv.) in PhCH<sub>3</sub> was added dropwise over 45 min. The reaction was stirred at -78 °C for 3h and subsequently quenched with MeOH (2.0 mL). The quenched reaction mixture was diluted with Et<sub>2</sub>O (10 mL), sat. Rochelle's salt (25 mL) and H<sub>2</sub>O (50 mL). The water layer was extracted three times with EtOAc (25 mL). The combined organic layers were washed once with H<sub>2</sub>O (15 mL), once with brine (15 mL), dried over Na<sub>2</sub>SO<sub>4</sub>, filtered, concentrated and purified using Büchi Pure C-810 Flash system (FlashPure EcoFlex Silica 12 g column, eluent: 18% : 82% EtOAc/Heptane → 100% EtOAc) to yield aldehyde **D2'** (0.544 g, 81%) as a colourless oil.

Data for **D2'**: White solid; *R*<sub>f</sub>=0.44 (Heptane/EtOAc 3:1); <sup>1</sup>H NMR (500 MHz, CDCl<sub>3</sub>) δ 9.60 (d, *J* = 0.9 Hz, 1H; 1), 7.74 – 7.65 (m, 2H; Ts), 7.28 (d, *J* = 8.2 Hz, 2H; Ts), 5.41 (d, *J* = 5.6 Hz, 1H; NH), 4.10 (qd, *J* = 6.4, 4.0 Hz, 1H; H3), 3.67 – 3.61 (m, 1H; H2), 2.40 (s, 3H; Ts), 1.35 (d, *J* = 6.4 Hz, 3H; H4), 0.79 (s, 9H; TBS), 0.01 (s, 3H; TBS), -0.03 (s, 3H; TBS). <sup>13</sup>C NMR (126 MHz, CDCl<sub>3</sub>) δ 198.5 (C1), 144.1 (Ts), 136.3 (Ts), 130.0 (Ts), 127.3 (Ts), 70.8 (C3), 66.7 (C2), 25.7 (TBS), 21.6 (Ts), 20.9 (C4), 18.0 (TBS), -4.5 (TBS), -5.0 (TBS). HRMS (ESI<sup>+</sup>): *m/z* calcd for C<sub>17</sub>H<sub>30</sub>NO<sub>4</sub>SSi<sup>+</sup>: 372.16593 [*M*+H]<sup>+</sup>; found: 372.16660.

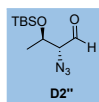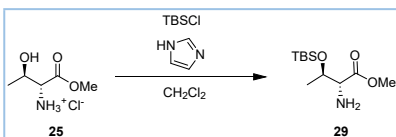

Crude D-*allo*-threonine methyl ester hydrochloride (**25**) (0.692 g, 4.08 mmol, 1.0 equiv.) was dispersed in CH<sub>2</sub>Cl<sub>2</sub> and evaporated. The procedure was repeated once more. Then, Ester **25** was suspended in dry CH<sub>2</sub>Cl<sub>2</sub> (14 mL) under N<sub>2</sub> atmosphere and imidazole (0.834 g, 12.3 mmol, 3.0 equiv.) was added. After 1h, TBSCl (0.698 g, 4.49 mmol, 1.1 equiv.) was added in one portion and the reaction was stirred at room temperature for 21h. Afterwards, the mixture was concentrated under reduced pressure and the residue was dissolved in H<sub>2</sub>O/EtOAc (40 mL; 1:1). The water layer was additionally extracted twice with EtOAc (20 mL). The combined organic layers were dried over Na<sub>2</sub>SO<sub>4</sub>, filtered, concentrated and purified using Büchi Pure C-815 Flash system (FlashPure EcoFlex Silica 12 g column, eluent: 62% : 38% EtOAc/Heptane → 100% EtOAc). Fractions with the product were concentrated, co-evaporated twice with CHCl<sub>3</sub> and dried each time for 0.5h at 40 °C, 50 mbar to yield methyl *O*-(*tert*-butyldimethylsilyl)-D-*allo*-threoninate (**29**) (0.786 g, 78% over three steps) as a colorless oil.



Data for **29**: Colorless oil;  $R_f$ =0.46 (EtOAc);  $^1\text{H}$  NMR (500 MHz,  $\text{CDCl}_3$ )  $\delta$  4.03 (qd,  $J$  = 6.3, 4.7 Hz, 1H; H3), 3.71 (s, 3H; OMe), 3.49 (d,  $J$  = 4.7 Hz, 1H; H2), 1.70 (s, 2H;  $\text{NH}_2$ ), 1.13 (d,  $J$  = 6.3 Hz, 3H; H4), 0.87 (s, 9H; TBS), 0.07 (s, 3H; TBS), 0.06 (s, 3H; TBS).  $^{13}\text{C}$  NMR (126 MHz,  $\text{CDCl}_3$ )  $\delta$  173.9 (C1), 70.5 (C3), 61.0 (C2), 52.0 (OMe), 25.8 (TBS), 18.9 (C4), 18.1 (TBS), -4.3 (TBS), -4.9 (TBS). HRMS (ESI+):  $m/z$  calcd for  $\text{C}_{11}\text{H}_{26}\text{NO}_3\text{Si}^+$ : 248.16765  $[M+H]^+$ ; found: 248.16770.

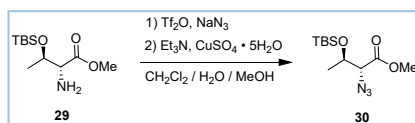

Compound **30** was prepared following adopted procedure from Nicolaou *et al.*<sup>[12]</sup>  $\text{TiF}_2\text{O}$  (1.6 mL, 9.4 mmol, 3.0 equiv.) was added dropwise to a solution of  $\text{NaN}_3$  (1.23 g, 19.9 mmol, 6.0 equiv.) in  $\text{CH}_2\text{Cl}_2/\text{H}_2\text{O}$  (6 mL, 1:1) at 0 °C. The reaction was stirred at 0 °C for 2h and sat.  $\text{NaHCO}_3$  (3 mL) was added. The layers were separated, and the water layer was additionally extracted twice with  $\text{CH}_2\text{Cl}_2$  (3 mL). The combined organic layers were washed once with sat.  $\text{NaHCO}_3$  (3 mL). Formed solution of  $\text{TiF}_3$  solution in  $\text{CH}_2\text{Cl}_2$  was added to a solution of methyl *O*-(*tert*-butyldimethylsilyl)-*D*-*allo*-threoninate (**29**) (0.778 g, 3.14 mmol, 1.0 equiv.) in MeOH (25 mL) and  $\text{H}_2\text{O}$  (8 mL), followed by addition of  $\text{Et}_3\text{N}$  (1.3 mL, 9.3 mmol, 3.0 equiv.) and  $\text{CuSO}_4 \cdot 5\text{H}_2\text{O}$  (39 mg, 0.16 mmol, 5 mol%) at room temperature. The mixture was stirred at room temperature for 1.5h and volatiles were removed *in vacuo*. The residual aqueous layer was extracted three times with EtOAc (10 mL). The combined organic layers were washed once with brine (10 mL), dried over  $\text{Na}_2\text{SO}_4$ , filtered, concentrated on silica gel and purified using Büchi Pure C-815 Flash system (FlashPure EcoFlex Silica 12 g column, eluent: 3% : 97% EtOAc/Heptane  $\rightarrow$  100% EtOAc). Fractions with the product were concentrated, co-evaporated twice with  $\text{CHCl}_3$  and dried each time for 0.5h at 40 °C, 50 mbar to yield methyl (2*R*,3*R*)-2-azido-3-((*tert*-butyldimethylsilyl)oxy)butanoate (**30**) (0.78 g, 90%) as a colorless oil.

Data for **30**: Colorless oil;  $R_f$ =0.54 (Heptane/EtOAc 10:1);  $^1\text{H}$  NMR (500 MHz,  $\text{CDCl}_3$ )  $\delta$  4.25 – 4.19 (m, 1H; H3), 3.84 (d,  $J$  = 5.5 Hz, 1H; H2), 3.77 (s, 3H; OMe), 1.24 (d,  $J$  = 6.1 Hz, 3H; H4), 0.87 (s, 9H; TBS), 0.09 (s, 3H; TBS), 0.08 (s, 3H; TBS).  $^{13}\text{C}$  NMR (126 MHz,  $\text{CDCl}_3$ )  $\delta$  169.2 (C1), 69.8 (C3), 68.1 (C2), 52.6 (OMe), 25.7 (TBS), 19.9 (C4), 18.0 (TBS), -4.3 (TBS), -5.0 (TBS). HRMS (ESI+):  $m/z$  calcd for  $\text{C}_{11}\text{H}_{24}\text{N}_3\text{O}_3\text{Si}^+$ : 274.15814  $[M+H]^+$ ; found: 274.15855.

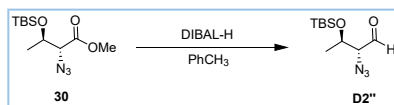

A solution of methyl (2*R*,3*R*)-2-azido-3-((*tert*-butyldimethylsilyl)oxy)butanoate (**30**) (0.764 g, 2.79 mmol, 1.0 equiv.) in dry  $\text{PhCH}_3$  (10 mL) was cooled to -78 °C under  $\text{N}_2$  atmosphere and DIBAL-H (2.6 mL, 1.2 M, 3.1 mmol, 1.1 equiv.) in  $\text{PhCH}_3$  was added dropwise over 10 min. The reaction was stirred at -78 °C for 2h and subsequently quenched with MeOH (1.5 mL). The quenched reaction mixture was diluted with EtOAc (30 mL) and sat. Rochelle's salt (30 mL). The water layer was additionally extracted twice with EtOAc (30 mL). The combined organic layers were washed once with  $\text{H}_2\text{O}$  (30 mL), once with brine (30 mL), dried over  $\text{Na}_2\text{SO}_4$ , filtered, concentrated *in vacuo*, co-evaporated twice with  $\text{CHCl}_3$  and dried each time for 20 min at 40 °C, 50 mbar to yield crude (2*R*,3*R*)-2-azido-3-((*tert*-butyldimethylsilyl)oxy)butanal (**D2''**) (0.68 g, quantitatively) as a yellowish oil, which was used in next steps without additional purification.

Note: Due to stability issues of the aldehyde **D2''**, it was not possible to obtain HRMS, and it should be used in the next step as soon as possible.

Data for **D2''**: Yellowish oil;  $R_f$ =0.33 (Heptane/EtOAc 10:1);  $^1\text{H}$  NMR (500 MHz,  $\text{CDCl}_3$ )  $\delta$  9.59 (d,  $J$  = 1.1 Hz, 1H; H1), 4.22 (qd,  $J$  = 6.2, 4.5 Hz, 1H; H3), 3.86 (dd,  $J$  = 4.6, 1.3 Hz, 1H; H2), 1.28 (d,  $J$  = 6.3 Hz, 3H; H4), 0.89 (s, 9H; TBS), 0.10 (s, 6H; TBS).  $^{13}\text{C}$  NMR (126 MHz,  $\text{CDCl}_3$ )  $\delta$  197.9 (C1), 73.0 (C2), 69.8 (C3), 25.8 (TBS), 20.4 (C4), 18.0 (TBS), -4.3 (TBS), -4.9 (TBS).

## Sml<sub>2</sub> Preparation

### Typical Purification of 1,2-Diiodoethane

1,2-Diiodoethane was purified following procedure of Procter *et al.*<sup>[17]</sup> 1,2-Diiodoethane (1.0 g) was dissolved in  $\text{Et}_2\text{O}$  (20 mL), washed five times with sat.  $\text{Na}_2\text{S}_2\text{O}_3$  (5 mL), once with  $\text{H}_2\text{O}$  (5 mL), dried over  $\text{Na}_2\text{SO}_4$ , filtered, concentrated, wrapped in aluminum foil and dried under high vacuum for 10-15 min to give a white solid.

### Typical Preparation of Sml<sub>2</sub>

Sml<sub>2</sub> was prepared following procedure of Procter *et al.*<sup>[17]</sup> A 50 mL round-bottom flask flame-dried under vacuum was equipped with a magnetic stir bar and evacuated/backfilled with  $\text{N}_2$  three times using Schlenk line. The flask was removed from the Schlenk line, equipped with a septum, a  $\text{N}_2$  balloon and Sm (0.60 g, 4.0 mmol) was added followed by addition of freshly purified 1,2-diiodoethane (0.56 g, 2.0 mmol). The mixture was evacuated/backfilled with  $\text{N}_2$  three times, started to stir and dry THF (20 mL) was added via

syringe. The flask with the mixture was evacuated/backfilled with N<sub>2</sub> three times. The N<sub>2</sub> balloon was then removed, the flask was sealed with parafilm, and the reaction mixture was stirred at room temperature for 1-3 days prior to use.

## Imine/Aldehyde Reductive Cross-Couplings using Sml<sub>2</sub>

### General Procedure **A** for the Cross-Coupling using Sml<sub>2</sub>

The sulfinimine (1.0 equiv.) and aldehyde (1.5 equiv.) were placed in a flame-dried 25 mL round-bottom flask equipped with a magnetic stir bar under N<sub>2</sub> atmosphere. The flask was subjected to three evacuation/backfilling cycles and dissolved in degassed dry THF. To this, a solution of *t*-BuOH (1.0 M, 3.0 eq) in degassed dry THF was added dropwise. The solution was cooled to -78 °C and freshly prepared Sml<sub>2</sub> (0.1 M) solution in THF was added dropwise over 15-20 min. The reaction was stirred at -78 °C for 3h. Afterwards, the reaction was quenched with sat. Na<sub>2</sub>S<sub>2</sub>O<sub>3</sub>, warmed to r.t. and poured into sat. Na<sub>2</sub>S<sub>2</sub>O<sub>3</sub>/EtOAc (2 : 3). Layers were separated and the water layer was extracted twice with EtOAc. The combined org. layers were dried over Na<sub>2</sub>SO<sub>4</sub>, filtered, concentrated on silica gel and purified using Büchi Pure C-815 Flash system.

### General Procedure **B** for the Cross-Coupling using Sml<sub>2</sub>

The sulfinimine (1.0 equiv.) was placed in a flame-dried 25 mL round-bottom flask equipped with a magnetic stir bar under N<sub>2</sub> atmosphere. The flask was subjected to three evacuation/backfilling cycles and dissolved in degassed dry THF. The solution was cooled to -78 °C and freshly prepared Sml<sub>2</sub> (0.1 M, 3.0 eq) solution in THF was added dropwise over 15 min. To this, a solution of aldehyde (3.0 eq) and *t*-BuOH (3.0 eq) in degassed dry THF was added over 1h. Afterwards, the reaction was quenched with sat. Na<sub>2</sub>S<sub>2</sub>O<sub>3</sub>, warmed to room temperature and poured into sat. Na<sub>2</sub>S<sub>2</sub>O<sub>3</sub>/EtOAc (2 : 3). Layers were separated and the water layer was extracted twice with EtOAc. The combined org. layers were dried over Na<sub>2</sub>SO<sub>4</sub>, filtered, concentrated on silica gel and purified using Büchi Pure C-815 Flash system.

### Optimization #1

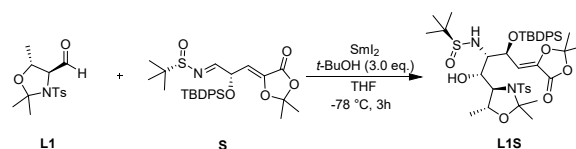

The sulfinimine **S** (133 mg, 0.25 mmol, 1.5 equiv. or 88.5 mg, 0.17 mmol, 1.0 equiv.) and aldehyde **L1** (50.0 mg, 0.17 mmol, 1.0 equiv. or 74.8 mg, 0.25 mmol, 1.5 equiv.) were placed in a flame-dried 25 mL round-bottom flask equipped with a magnetic stir bar under N<sub>2</sub> atmosphere. The flask was subjected to three evacuation/backfilling cycles and dissolved in degassed dry THF (3 mL). To this, a solution of *t*-BuOH (0.50 mL, 1.0 M, 3.0 eq) in degassed dry THF was added dropwise followed by dropwise addition of additive. The solution was cooled to -78 °C and freshly prepared Sml<sub>2</sub> (0.1 M) solution in THF was added dropwise over 15 min. The reaction was stirred at -78 °C for 3h. Afterwards, the reaction mixture was quenched with sat. Na<sub>2</sub>S<sub>2</sub>O<sub>3</sub> (5 mL), warmed to r.t. and poured into sat. Na<sub>2</sub>S<sub>2</sub>O<sub>3</sub>/EtOAc (25 mL, 2 : 3). Layers were separated and the water layer was extracted twice with EtOAc (20 mL). The combined org. layers were dried over Na<sub>2</sub>SO<sub>4</sub>, filtered, concentrated and <sup>1</sup>H NMR was performed. Afterwards, the crude was concentrated on silica gel and purified using Büchi Pure C-815 Flash system (FlashPure EcoFlex Silica 12 g column, eluent: 33% : 67% EtOAc/Heptane → 100% EtOAc). Results are shown in Table S1.

**Table S1.** Optimization #1

| Entry | <b>L1</b><br>equiv. | <b>S</b><br>equiv. | Sml <sub>2</sub><br>equiv. | Additives                | Conversion,<br>% [a] | Yield of<br><b>L1S</b> , % [b] | dr[c] |
|-------|---------------------|--------------------|----------------------------|--------------------------|----------------------|--------------------------------|-------|
| 1     |                     |                    | 2.0                        |                          | 70                   | 49                             | 8:1   |
| 2     |                     |                    | 3.0                        |                          | 81                   | 69                             | 50:1  |
| 3     | 1.0                 | 1.5                | 2.0                        | H <sub>2</sub> O (50 eq) | traces               | 0                              |       |
| 4     |                     |                    |                            | HMPA (12 eq)             | Full                 | 0                              |       |
| 5[d]  |                     |                    | 3.0                        |                          | 80                   | 68                             | 25:1  |
| 6     |                     |                    |                            |                          | 72                   | 58                             | 33:1  |
| 7     | 1.5                 | 1.0                |                            |                          | 75                   | 73                             | 33:1  |

[a] Based on crude <sup>1</sup>H NMR and isolated yield of **L1S**. [b] Isolated yield. [c] Based on crude <sup>1</sup>H NMR. [d] **L1**, **S** and *t*-BuOH were added to the cooled solution of Sml<sub>2</sub> in THF.

### Comparison of differently protected D-*allo*-threonine derived aldehydes in cross-coupling with sulfinimine **R**

**Table S2.** Cross-Coupling between sulfinimine **R** and various D-*allo*-threonine derived aldehydes

| Entry <sup>[a]</sup> | Sulfinimine |        | Aldehyde  |        | Deviations from<br>General Procedure <b>A</b> | Yield, % <sup>[b]</sup> |
|----------------------|-------------|--------|-----------|--------|-----------------------------------------------|-------------------------|
|                      | Structure   | equiv. | Structure | equiv. |                                               |                         |

|   |                                                                                   |                                                                                   |                                                            |                                                            |                   |
|---|-----------------------------------------------------------------------------------|-----------------------------------------------------------------------------------|------------------------------------------------------------|------------------------------------------------------------|-------------------|
| 1 |  |                                                                                   | -78 °C, 5h and slowly warmed to room temperature overnight | <2                                                         |                   |
| 2 |  |  | 1.5                                                        | -78 °C, 5h and slowly warmed to room temperature overnight | <9                |
| 3 |                                                                                   |  |                                                            | -                                                          | 32 <sup>[c]</sup> |

[a] Followed General Procedure A. [b] Based on crude <sup>1</sup>H NMR. [c] Isolated yield.

## Optimization #2

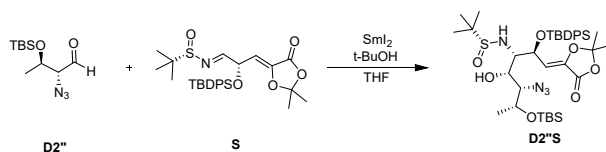

Cross-couplings were performed following general procedure A or B on a 0.17 mmol scale. The exact conditions and the results are summarized in table S3.

**Table S3.** Optimization #2

| Entry | Sulfimine<br>Structure                                                              | equiv. | Aldehyde<br>Structure                                                               | equiv. | Procedure | Yield, % <sup>[a]</sup> |
|-------|-------------------------------------------------------------------------------------|--------|-------------------------------------------------------------------------------------|--------|-----------|-------------------------|
| 1     |                                                                                     |        |                                                                                     | 1.5    | <b>A</b>  | 5                       |
| 2     | 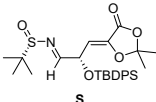 | 1.0    |  | 3.0    |           | 16                      |
| 3     |                                                                                     |        |                                                                                     | 1.5    | <b>B</b>  | 14                      |
| 4     |                                                                                     |        |                                                                                     | 3.0    |           | 18                      |

[a] Isolated yields.

## Imine/Aldehyde Reductive Cross-Couplings using SmI<sub>2</sub>

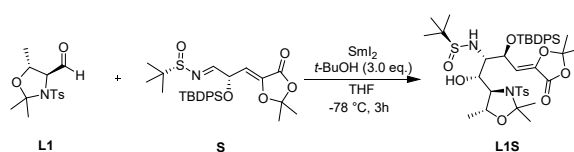

Compound **L1S** was prepared following general procedure A. The sulfinimine **S** (141 mg, 0.268 mol, 1.0 equiv.) and aldehyde **L1** (120 mg, 0.402 mmol, 1.5 equiv.) were placed in a flame-dried 25 mL round-bottom flask equipped with a magnetic stir bar under N<sub>2</sub>.

atmosphere. The flask was subjected to three evacuation/backfilling cycles and dissolved in degassed dry THF (4.5 mL). To this, a solution of *t*-BuOH (0.80 mL, 1.0 M, 3.0 eq) in degassed dry THF was added dropwise. The solution was cooled to -78 °C and freshly prepared  $\text{SmI}_2$  (8.0 mL, 0.1 M, 0.80 mmol, 3.0 equiv.) solution in THF was added dropwise over 15 min. The reaction was stirred at -78 °C for 3h. Afterwards, the reaction was quenched with sat.  $\text{Na}_2\text{S}_2\text{O}_3$  (5 mL), warmed to r.t. and poured into sat.  $\text{Na}_2\text{S}_2\text{O}_3/\text{EtOAc}$  (35 mL, 2 : 3). Layers were separated and the water layer was extracted twice with EtOAc (20 mL). The combined org. layers were dried over  $\text{Na}_2\text{SO}_4$ , filtered, concentrated on silica gel and purified using Büchi Pure C-810 Flash system (FlashPure EcoFlex Silica 12 g column, eluent: 33% : 67% EtOAc/Heptane  $\rightarrow$  100% EtOAc) to yield desired product **L1S** (0.169 g, 76%) as a colorless oil.

Data for **L1S**: Colorless oil;  $R_f=0.37$  (Heptane/EtOAc 1:1);  $^1\text{H}$  NMR (500 MHz,  $\text{CDCl}_3$ )  $\delta$  7.92 – 7.85 (m, 2H; TBDPS), 7.74 – 7.68 (m, 2H; Ts), 7.65 – 7.58 (m, 2H; TBDPS), 7.54 – 7.49 (m, 3H; TBDPS), 7.42 – 7.38 (m, 1H; TBDPS), 7.36 – 7.31 (m, 2H; TBDPS), 7.28 – 7.25 (m, 2H; Ts), 6.30 (d,  $J$  = 9.6 Hz, 1H; H3), 5.07 (dd,  $J$  = 9.6, 0.9 Hz, 1H; H4), 4.43 (d,  $J$  = 9.1 Hz, 1H; NH), 4.25 (qd,  $J$  = 6.3, 4.6 Hz, 1H; H8), 4.12 (ddd,  $J$  = 10.7, 6.1, 1.9 Hz, 1H; H6), 3.72 (dd,  $J$  = 4.7, 1.7 Hz, 1H; H7), 2.93 – 2.82 (m, 1H; H5), 2.43 (s, 3H; Ts), 1.54 (s, 3H;  $\text{C}(\text{CH}_3)_2$ ), 1.53 (s, 3H;  $\text{C}(\text{CH}_3)_2$ ), 1.48 (s, 3H;  $\text{C}(\text{CH}_3)_2$ ), 1.39 (br, 1H; OH), 1.22 (s, 9H;  $t\text{BuS}(\text{O})\text{N}$ ), 1.14 (d, 3H; H9), 1.13 (s, 9H; TBDPS), 1.09 (s, 3H;  $\text{C}(\text{CH}_3)_2$ ).  $^{13}\text{C}$  NMR (126 MHz,  $\text{CDCl}_3$ )  $\delta$  162.2 (C1), 143.6 (Ts), 138.6 (C2), 138.5 (Ts), 136.6 (TBDPS), 136.3 (TBDPS), 132.8 (TBDPS), 132.6 (TBDPS), 130.7 (TBDPS), 130.1 (TBDPS), 129.7 (Ts), 128.4 (TBDPS), 127.6 (TBDPS), 127.5 (Ts), 111.3 ( $\text{C}(\text{CH}_3)_2$ ), 108.5 (C3), 97.7 ( $\text{C}(\text{CH}_3)_2$ ), 71.0 (C6 and C8), 66.8 (C7), 65.6 (C4), 61.8 (C5), 56.7 ( $(\text{CH}_3)_3\text{CS}(\text{O})\text{N}$ ), 29.5 ( $\text{C}(\text{CH}_3)_2$ ), 28.1 ( $\text{C}(\text{CH}_3)_2$ ), 27.3 (TBDPS), 27.0 ( $\text{C}(\text{CH}_3)_2$ ), 26.3 ( $\text{C}(\text{CH}_3)_2$ ), 23.1 ( $(\text{CH}_3)_3\text{CS}(\text{O})\text{N}$ ), 22.3 (C9), 21.6 (Ts), 19.3 (TBDPS). HRMS (ESI+):  $m/z$  calcd for  $\text{C}_{42}\text{H}_{58}\text{N}_2\text{O}_9\text{S}_2\text{SiNa}^+$ : 849.32452 [ $M+\text{Na}$ ] $^+$ ; found: 849.32927.

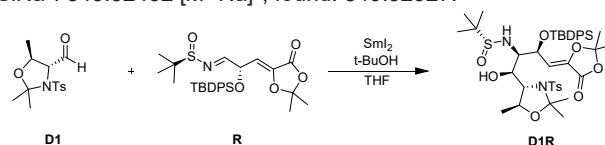

Compound **D1R** was prepared following general procedure **A**. The sulfinimine **R** (88.5 mg, 0.168 mol, 1.0 equiv.) and aldehyde **L1** (74.8 mg, 0.252 mmol, 1.5 equiv.) were placed in a flame-dried 25 mL round-bottom flask equipped with a magnetic stir bar under  $\text{N}_2$  atmosphere. The flask was subjected to three evacuation/backfilling cycles and dissolved in degassed dry THF (3.0 mL). To this, a solution of *t*-BuOH (0.50 mL, 1.0 M, 0.50 mmol, 3.0 eq) in degassed dry THF was added dropwise. The solution was cooled to -78 °C and freshly prepared  $\text{SmI}_2$  (5.0 mL, 0.1 M, 0.50 mmol, 3.0 equiv.) solution in THF was added dropwise over 15 min. The reaction was stirred at -78 °C for 3h. Afterwards, the reaction was quenched with sat.  $\text{Na}_2\text{S}_2\text{O}_3$  (3 mL), warmed to r.t. and poured into sat.  $\text{Na}_2\text{S}_2\text{O}_3/\text{EtOAc}$  (25 mL, 2 : 3). Layers were separated and the water layer was extracted twice with EtOAc (15 mL). The combined org. layers were dried over  $\text{Na}_2\text{SO}_4$ , filtered, concentrated on silica gel and purified using Büchi Pure C-810 Flash system (FlashPure EcoFlex Silica 12 g column, eluent: 33% : 67% EtOAc/Heptane  $\rightarrow$  100% EtOAc) to yield a mixture of two diastereomers (0.114 g, 82%), where desired product **D1R** is a major diastereomer (dr 10:1).

Data for **D1R** (major diastereomer): Colorless oil;  $R_f=0.50$  (Heptane/EtOAc 1:1);  $^1\text{H}$  NMR (500 MHz,  $\text{CDCl}_3$ )  $\delta$  7.74 – 7.68 (m, 6H; TBDPS and Ts), 7.43 – 7.36 (m, 6H; TBDPS), 7.26 – 7.24 (m, 2H; Ts), 5.79 (d,  $J$  = 8.5 Hz, 1H; H3), 5.24 (dd,  $J$  = 8.5, 2.2 Hz, 1H; H4), 4.29 (ddd,  $J$  = 10.4, 5.0, 1.9 Hz, 1H; H6), 4.24 (p,  $J$  = 6.1 Hz, 1H; H8), 3.68 (dd,  $J$  = 5.7, 1.9 Hz, 1H; H7), 3.59 (d,  $J$  = 9.1 Hz, 1H; NH), 3.21 (ddd,  $J$  = 11.0, 9.1, 2.2 Hz, 1H; H5), 2.63 (d,  $J$  = 5.0 Hz, 1H; OH), 2.41 (s, 3H; Ts), 1.63 (s, 3H;  $\text{C}(\text{CH}_3)_2$ ), 1.62 (s, 3H;  $\text{C}(\text{CH}_3)_2$ ), 1.53 (s, 3H;  $\text{C}(\text{CH}_3)_2$ ), 1.33 (s, 3H;  $\text{C}(\text{CH}_3)_2$ ), 1.15 (d,  $J$  = 6.3 Hz, 3H; H9), 1.11 (s, 18H; TBDPS and  $t\text{BuS}(\text{O})\text{N}$ ).  $^{13}\text{C}$  NMR (126 MHz,  $\text{CDCl}_3$ )  $\delta$  162.1 (C1), 143.8 (Ts), 137.9 (Ts), 137.3 (C2), 136.2 (TBDPS), 136.1 (TBDPS), 133.3 (TBDPS), 133.1 (TBDPS), 130.1 (TBDPS), 130.0 (TBDPS), 129.8 (Ts), 127.9 (TBDPS), 127.8 (TBDPS), 127.6 (Ts), 111.7 ( $\text{C}(\text{CH}_3)_2$ ), 109.6 (C3), 97.8 ( $\text{C}(\text{CH}_3)_2$ ), 71.2 (C4), 71.0 (C8), 70.8 (C6), 66.7 (C7), 62.1 (C5), 56.6 ( $(\text{CH}_3)_3\text{CS}(\text{O})\text{N}$ ), 29.3 ( $\text{C}(\text{CH}_3)_2$ ), 28.0 ( $\text{C}(\text{CH}_3)_2$ ), 27.2 (TBDPS), 26.7 ( $\text{C}(\text{CH}_3)_2$ ), 26.6 ( $\text{C}(\text{CH}_3)_2$ ), 22.8 ( $(\text{CH}_3)_3\text{CS}(\text{O})\text{N}$ ), 22.0 (C9), 21.6 (Ts), 19.5 (TBDPS). HRMS (ESI+):  $m/z$  calcd for  $\text{C}_{42}\text{H}_{58}\text{N}_2\text{O}_9\text{S}_2\text{SiNa}^+$ : 849.32452 [ $M+\text{Na}$ ] $^+$ ; found: 849.32814.

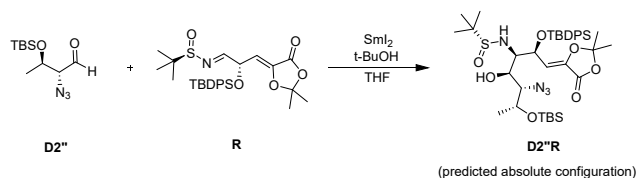

Compound **D2''R** was prepared following slightly modified general procedure **A**. The sulfinimine **R** (88.5 mg, 0.168 mol, 1.0 equiv.) was placed in a flame-dried 25 mL round-bottom flask equipped with a magnetic stir bar under  $\text{N}_2$  atmosphere. The flask was subjected to three evacuation/backfilling cycles and dissolved in degassed dry THF (2.0 mL). To this, a solution of aldehyde **D2''** (1.0 mL, 0.25 M, 0.252 mmol, 1.5 equiv.) in degassed dry THF was added followed by a solution of *t*-BuOH (0.50 mL, 1.0 M, 0.50 mmol, 3.0 eq) in degassed dry THF addition. The solution was cooled to -78 °C and freshly prepared  $\text{SmI}_2$  (5.0 mL, 0.1 M, 0.50 mmol, 3.0 equiv.) solution in THF was added dropwise over 20 min. The reaction was stirred at -78 °C for 3h. Afterwards, the reaction was quenched with sat.  $\text{Na}_2\text{S}_2\text{O}_3$  (3 mL), warmed to r.t. and poured into sat.  $\text{Na}_2\text{S}_2\text{O}_3/\text{EtOAc}$  (25 mL, 2 : 3). Layers were separated and the water layer was extracted twice with EtOAc (15 mL). The combined org. layers were dried over  $\text{Na}_2\text{SO}_4$ , filtered, concentrated on silica gel and purified using Büchi Pure C-815 Flash system (FlashPure EcoFlex Silica 12 g column, eluent: 34% : 66% EtOAc/Heptane  $\rightarrow$  100% EtOAc) to yield desired product **D2''R** (41.4 mg, 32%) as a yellowish foam. Note: Product contains ~6% of an impurity, which forms during flash chromatography.

Data for **D2''R**: Yellowish foam;  $R_f$ =0.24 (Heptane/EtOAc 2:1);  $^1\text{H}$  NMR (500 MHz,  $\text{CDCl}_3$ )  $\delta$  7.74 – 7.70 (m, 2H; TBDPS), 7.67 – 7.63 (m, 2H; TBDPS), 7.46 – 7.34 (m, 6H; TBDPS), 5.64 (d,  $J$  = 9.0 Hz, 1H; H3), 5.02 (dd,  $J$  = 9.0, 4.3 Hz, 1H; H4), 4.32 – 4.25 (m, 1H; H8), 4.10 (d,  $J$  = 6.1 Hz, 1H; NH), 3.74 (ddd,  $J$  = 6.0, 4.3, 3.2 Hz, 1H; H5), 3.62 (ddd,  $J$  = 9.9, 5.3, 3.3 Hz, 1H; H6), 3.56 (dd,  $J$  = 9.9, 3.1 Hz, 1H; H7), 3.19 (d,  $J$  = 5.2 Hz, 1H; OH), 1.48 (s, 3H;  $\text{C}(\text{CH}_3)_2$ ), 1.24 (s, 9H;  $t\text{BuS}(\text{O})\text{N}$ ), 1.21 (s, 3H;  $\text{C}(\text{CH}_3)_2$ ), 1.14 (d,  $J$  = 6.3 Hz, 3H), 1.08 (s, 9H; TBDPS), 0.88 (s, 9H; TBS), 0.08 (s, 3H; TBS), 0.06 (s, 3H; TBS).  $^{13}\text{C}$  NMR (126 MHz,  $\text{CDCl}_3$ )  $\delta$  161.9 (C1), 138.4 (C2), 136.1 (TBDPS), 136.1 (TBDPS), 132.9 (TBDPS), 132.1 (TBDPS), 130.3 (TBDPS), 130.1 (TBDPS), 128.0 (TBDPS), 127.8 (TBDPS), 111.8 ( $\text{C}(\text{CH}_3)_2$ ), 108.2 (C3), 71.4 (C6), 70.0 (C8), 69.7 (C4), 67.9 (C7), 61.2 (C5), 56.6 ( $(\text{CH}_3)_3\text{CS}(\text{O})\text{N}$ ), 27.1 (TBDPS), 26.9 ( $\text{C}(\text{CH}_3)_2$ ), 26.4 ( $\text{C}(\text{CH}_3)_2$ ), 25.9 (TBS), 22.9 ( $(\text{CH}_3)_3\text{CS}(\text{O})\text{N}$ ), 19.4 (TBDPS), 18.0 (C9), 17.5 (TBS), -4.3 (TBS), -4.6 (TBS). HRMS (ESI+):  $m/z$  calcd for  $\text{C}_{38}\text{H}_{61}\text{N}_4\text{O}_7\text{SSi}_2^+$ : 773.37940  $[M+\text{H}]^+$ ; found: 773.38203.

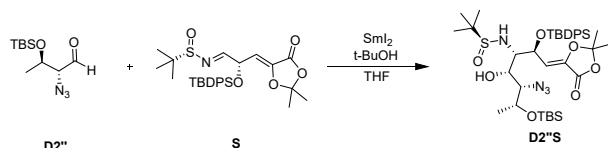

Compound **D2''S** was prepared following general procedure B. The sulfinimine **S** (88.5 mg, 0.168 mol, 1.0 equiv.) was placed in a flame-dried 25 mL round-bottom flask equipped with a magnetic stir bar under  $\text{N}_2$  atmosphere. The flask was subjected to three evacuation/backfilling cycles and dissolved in degassed dry THF (2.0 mL). The solution was cooled to  $-78^\circ\text{C}$  and freshly prepared  $\text{SmI}_2$  (5.0 mL, 0.1 M, 0.50 mmol, 3.0 eq) solution in THF was added dropwise over 15 min. To this, a solution of aldehyde **D2''** (122 mg, 0.50 mmol, 3.0 equiv.) and  $t\text{-BuOH}$  (37 mg, 0.50 mmol, 3.0 equiv.) in degassed dry THF (2.0 mL) was added dropwise over 1h. The reaction was stirred at  $-78^\circ\text{C}$  for 3h. Afterwards, the reaction was quenched with sat.  $\text{Na}_2\text{S}_2\text{O}_3$  (3 mL), warmed to r.t. and poured into sat.  $\text{Na}_2\text{S}_2\text{O}_3/\text{EtOAc}$  (25 mL, 2 : 3). Layers were separated and the water layer was extracted twice with EtOAc (15 mL). The combined org. layers were dried over  $\text{Na}_2\text{SO}_4$ , filtered, concentrated on silica gel and purified using Büchi Pure C-815 Flash system (FlashPure EcoFlex Silica 25 g column, eluent: 29% : 71% EtOAc/Heptane  $\rightarrow$  100% EtOAc) to yield desired product **D2''S** (24.1 mg, 18%) as a yellowish oil.

Data for **D2''S**: Yellowish oil;  $R_f$ =0.34 (Heptane/EtOAc 2:1);  $^1\text{H}$  NMR (500 MHz,  $\text{CDCl}_3$ )  $\delta$  7.76 – 7.71 (m, 2H; TBDPS), 7.63 – 7.59 (m, 2H; TBDPS), 7.46 – 7.41 (m, 1H; TBDPS), 7.40 – 7.35 (m, 3H; TBDPS), 7.35 – 7.30 (m, 2H; TBDPS), 6.06 (d,  $J$  = 9.3 Hz, 1H; H3), 5.25 (dd,  $J$  = 9.3, 1.3 Hz, 1H; H4), 4.27 – 4.15 (m, 2H; H8 and NH), 3.91 (ddd,  $J$  = 9.9, 3.5, 1.3 Hz, 1H; H6), 3.34 – 3.24 (m, 2H; H5 and H7), 3.11 (d,  $J$  = 3.5 Hz, 1H; OH), 1.48 (s, 3H;  $\text{C}(\text{CH}_3)_2$ ), 1.26 (s, 9H;  $t\text{BuS}(\text{O})\text{N}$ ), 1.21 (d,  $J$  = 6.3 Hz, 3H; H9), 1.17 (s, 3H;  $\text{C}(\text{CH}_3)_2$ ), 1.08 (s, 9H; TBDPS), 0.90 (s, 9H; TBS), 0.14 (s, 3H; TBS), 0.12 (s, 3H; TBS).  $^{13}\text{C}$  NMR (126 MHz,  $\text{CDCl}_3$ )  $\delta$  162.1 (C1), 138.3 (C2), 136.2 (TBDPS), 136.1 (TBDPS), 133.0 (TBDPS), 132.7 (TBDPS), 130.2 (TBDPS), 130.1 (TBDPS), 127.9 (TBDPS), 127.6 (TBDPS), 111.4 ( $\text{C}(\text{CH}_3)_2$ ), 108.5 (C3), 70.8 (C8), 70.4 (C6), 66.4 (C4), 65.1 (C7), 61.7 (C5), 56.5 ( $(\text{CH}_3)_3\text{CS}(\text{O})\text{N}$ ), 27.2 (TBDPS), 26.9 ( $\text{C}(\text{CH}_3)_2$ ), 26.4 ( $\text{C}(\text{CH}_3)_2$ ), 25.9 (TBS), 23.1 ( $(\text{CH}_3)_3\text{CS}(\text{O})\text{N}$ ), 21.3 (C9), 19.5 (TBDPS), 17.9 (TBS), -4.3 (TBS), -4.9 (TBS). HRMS (ESI+):  $m/z$  calcd for  $\text{C}_{38}\text{H}_{61}\text{N}_4\text{O}_7\text{SSi}_2^+$ : 773.37940  $[M+\text{H}]^+$ ; found: 773.38086.

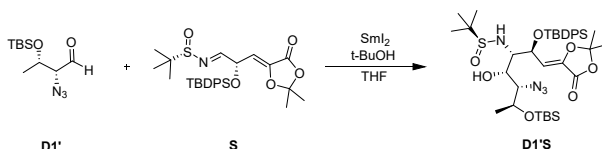

Compound **D1'S** was prepared following general procedure B. The sulfinimine **S** (88.5 mg, 0.168 mol, 1.0 equiv.) was placed in a flame-dried 25 mL round-bottom flask equipped with a magnetic stir bar under  $\text{N}_2$  atmosphere. The flask was subjected to three evacuation/backfilling cycles and dissolved in degassed dry THF (2.0 mL). The solution was cooled to  $-78^\circ\text{C}$  and freshly prepared  $\text{SmI}_2$  (5.0 mL, 0.1 M, 0.50 mmol, 3.0 eq) solution in THF was added dropwise over 15 min. To this, a solution of aldehyde **D1'** (122 mg, 0.50 mmol, 3.0 equiv.) and  $t\text{-BuOH}$  (37 mg, 0.50 mmol, 3.0 equiv.) in degassed dry THF (2.5 mL) was added dropwise over 1h. The reaction was stirred at  $-78^\circ\text{C}$  for 3h. Afterwards, the reaction was quenched with sat.  $\text{Na}_2\text{S}_2\text{O}_3$  (3 mL), warmed to r.t. and poured into sat.  $\text{Na}_2\text{S}_2\text{O}_3/\text{EtOAc}$  (25 mL, 2 : 3). Layers were separated and the water layer was extracted twice with EtOAc (15 mL). The combined org. layers were dried over  $\text{Na}_2\text{SO}_4$ , filtered, concentrated on silica gel and purified using Büchi Pure C-815 Flash system (FlashPure EcoFlex Silica 25 g column, eluent: 20% : 80% EtOAc/Heptane  $\rightarrow$  100% EtOAc) to yield desired product **D1'S** (44.3 mg, 34%) as a yellowish oil.

Data for **D1'S**: Yellowish oil;  $R_f$ =0.34 (Heptane/EtOAc 2:1);  $^1\text{H}$  NMR (500 MHz,  $\text{CDCl}_3$ )  $\delta$  7.74 – 7.68 (m, 2H; TBDPS), 7.63 – 7.57 (m, 2H; TBDPS), 7.48 – 7.44 (m, 1H; TBDPS), 7.42 – 7.37 (m, 3H; TBDPS), 7.36 – 7.31 (m, 2H; TBDPS), 6.09 (d,  $J$  = 9.3 Hz, 1H; H3), 5.17 (dd,  $J$  = 9.5, 1.4 Hz, 1H; H4), 4.25 (d,  $J$  = 8.4 Hz, 1H; NH), 4.02 (p,  $J$  = 6.2 Hz, 1H; H8), 3.59 (dd,  $J$  = 9.8, 6.8 Hz, 1H; H6), 3.34 (dd,  $J$  = 7.1, 1.3 Hz, 1H; H7), 3.30 (ddd,  $J$  = 9.6, 8.3, 1.3 Hz, 1H; H5), 2.07 (d,  $J$  = 7.1 Hz, 1H; OH), 1.48 (s, 3H;  $\text{C}(\text{CH}_3)_2$ ), 1.28 (s, 9H;  $t\text{BuS}(\text{O})\text{N}$ ), 1.18 – 1.14 (m, 6H; H9 and  $\text{C}(\text{CH}_3)_2$ ), 1.07 (s, 9H; TBDPS), 0.90 (s, 9H; TBS), 0.12 (s, 3H; TBS), 0.11 (s, 3H; TBS).  $^{13}\text{C}$  NMR (126 MHz,  $\text{CDCl}_3$ )  $\delta$  162.0 (C1), 138.4 (C2), 136.1 (TBDPS), 136.1 (TBDPS), 132.7 (TBDPS), 132.7 (TBDPS), 130.4 (TBDPS),

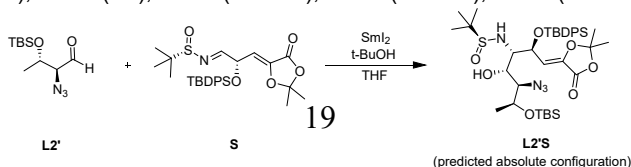

130.2 (TBDPS), 128.0 (TBDPS), 127.7 (TBDPS), 111.4 (C(CH<sub>3</sub>)<sub>2</sub>), 108.3 (C3), 71.8 (C6), 71.2 (C8), 68.0 (C7), 66.3 (C4), 62.2 (C5), 56.5 ((CH<sub>3</sub>)<sub>3</sub>CS(O)N), 27.1 (TBDPS), 26.8 (C(CH<sub>3</sub>)<sub>2</sub>), 26.4 (C(CH<sub>3</sub>)<sub>2</sub>), 25.9 (TBS), 23.1 ((CH<sub>3</sub>)<sub>3</sub>CS(O)N), 21.2 (C9), 19.5 (TBDPS), 18.0 (TBS), -4.3 (TBS), -4.8 (TBS). HRMS (ESI<sup>+</sup>): *m/z* calcd for C<sub>38</sub>H<sub>61</sub>N<sub>4</sub>O<sub>7</sub>SSi<sub>2</sub><sup>+</sup>: 773.37940 [*M*+H]<sup>+</sup>; found: 773.38066.

Compound **L2'S** was prepared following general procedure **B**. The sulfinimine **S** (125 mg, 0.236 mol, 1.0 equiv.) was placed in a flame-dried 25 mL round-bottom flask equipped with a magnetic stir bar under N<sub>2</sub> atmosphere. The flask was subjected to three evacuation/backfilling cycles and dissolved in degassed dry THF (3.0 mL). The solution was cooled to -78 °C and freshly prepared Sml<sub>2</sub> (7.0 mL, 0.1 M, 0.70 mmol, 3.0 eq) solution in THF was added dropwise over 15 min. To this, a solution of aldehyde **L2'** (176 mg, 0.72 mmol, 3.0 equiv.) and *t*-BuOH (53 mg, 0.71 mmol, 3.0 equiv.) in degassed dry THF (3 mL) was added dropwise over 1h. The reaction was stirred at -78 °C for 3h. Afterwards, the reaction was quenched with sat. Na<sub>2</sub>S<sub>2</sub>O<sub>3</sub> (5 mL), warmed to r.t. and poured into sat. Na<sub>2</sub>S<sub>2</sub>O<sub>3</sub>/EtOAc (35 mL, 3 : 4). Layers were separated and the water layer was extracted twice with EtOAc (20 mL). The combined org. layers were dried over Na<sub>2</sub>SO<sub>4</sub>, filtered, concentrated and purified using Büchi Pure C-815 Flash system (FlashPure EcoFlex Silica 25 g column, eluent: 31% : 69% EtOAc/Heptane → 100% EtOAc) to yield desired product **L2'S** (54.8 mg, 30%) as a yellowish oil.

Data for **L2'S**: Yellowish oil; *R*<sub>f</sub>=0.37 (Heptane/EtOAc 2:1); <sup>1</sup>H NMR (500 MHz, CDCl<sub>3</sub>) δ 7.75 – 7.71 (m, 2H; TBDPS), 7.65 – 7.61 (m, 2H; TBDPS), 7.48 – 7.45 (m, 1H; TBDPS), 7.44 – 7.39 (m, 3H; TBDPS), 7.38 – 7.34 (m, 2H; TBDPS), 5.94 (d, *J* = 9.3 Hz, 1H; H3), 5.11 (dd, *J* = 9.3, 2.0 Hz, 1H; H4), 4.31 (d, *J* = 7.6 Hz, 1H; NH), 4.26 (qd, *J* = 6.1, 3.3 Hz, 1H; H8), 3.50 (dd, *J* = 7.6, 3.5 Hz, 1H; H7), 3.46 (t, *J* = 6.5 Hz, 1H; H6), 3.42 (ddd, *J* = 7.4, 5.2, 2.2 Hz, 1H; H5), 2.72 (br, 1H; OH), 1.48 (s, 3H; C(CH<sub>3</sub>)<sub>2</sub>), 1.27 (s, 9H; *t*BuS(O)N), 1.20 – 1.15 (m, 6H; H9 and C(CH<sub>3</sub>)<sub>2</sub>), 1.08 (s, 9H; TBDPS), 0.90 (s, 9H; TBS), 0.09 (s, 3H; TBS), 0.06 (s, 3H; TBS). <sup>13</sup>C NMR (126 MHz, CDCl<sub>3</sub>) δ 161.7 (C1), 138.3 (C2), 136.2 (TBDPS), 136.1 (TBDPS), 132.7 (TBDPS), 132.4 (TBDPS), 130.5 (TBDPS), 130.3 (TBDPS), 128.1 (TBDPS), 127.8 (TBDPS), 111.5 (C(CH<sub>3</sub>)<sub>2</sub>), 108.5 (C3), 73.6 (C6), 69.7 (C8), 68.4 (C7), 67.5 (C4), 61.2 (C5), 56.5 ((CH<sub>3</sub>)<sub>3</sub>CS(O)N), 27.1 (TBDPS), 26.8 (C(CH<sub>3</sub>)<sub>2</sub>), 26.4 (C(CH<sub>3</sub>)<sub>2</sub>), 25.9 (TBS), 22.9 ((CH<sub>3</sub>)<sub>3</sub>CS(O)N), 19.4 (TBDPS), 18.6 (C9), 18.0 (TBS), -4.2 (TBS), -4.6 (TBS). HRMS (ESI<sup>+</sup>): *m/z* calcd for C<sub>38</sub>H<sub>60</sub>N<sub>4</sub>O<sub>7</sub>SSi<sub>2</sub>Na<sup>+</sup>: 795.36135 [*M*+Na]<sup>+</sup>; found: 795.36344.

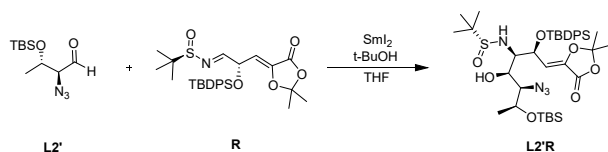

Compound **L2'R** was prepared following general procedure **B**. The sulfinimine **R** (125 mg, 0.236 mol, 1.0 equiv.) was placed in a flame-dried 25 mL round-bottom flask equipped with a magnetic stir bar under N<sub>2</sub> atmosphere. The flask was subjected to three evacuation/backfilling cycles and dissolved in degassed dry THF (3.0 mL). The solution was cooled to -78 °C and freshly prepared Sml<sub>2</sub> (7.0 mL, 0.1 M, 0.70 mmol, 3.0 eq) solution in THF was added dropwise over 15 min. To this, a solution of aldehyde **L2'** (176 mg, 0.72 mmol, 3.0 equiv.) and *t*-BuOH (53 mg, 0.71 mmol, 3.0 equiv.) in degassed dry THF (3 mL) was added dropwise over 1h. The reaction was stirred at -78 °C for 3h. Afterwards, the reaction was quenched with sat. Na<sub>2</sub>S<sub>2</sub>O<sub>3</sub> (5 mL), warmed to r.t. and poured into sat. Na<sub>2</sub>S<sub>2</sub>O<sub>3</sub>/EtOAc (35 mL, 3 : 4). Layers were separated and the water layer was extracted twice with EtOAc (20 mL). The combined org. layers were dried over Na<sub>2</sub>SO<sub>4</sub>, filtered, concentrated and purified using Büchi Pure C-815 Flash system (FlashPure EcoFlex Silica 25 g column, eluent: 26% : 74% EtOAc/Heptane → 100% EtOAc) to yield a mixture of three diastereomers (32.8 mg, 18%), where desired product **L2'R** is a major diastereomer (dr 10:1:2).

Data for **L2'R** (major diastereomer): Yellowish oil; *R*<sub>f</sub>=0.40 (Heptane/EtOAc 2:1); <sup>1</sup>H NMR (500 MHz, CDCl<sub>3</sub>) δ 7.72 – 7.67 (m, 4H; TBDPS), 7.43 – 7.33 (m, 6H; TBDPS), 5.70 (d, *J* = 8.7 Hz, 1H; H3), 5.16 (dd, *J* = 8.7, 3.0 Hz, 1H; H4), 4.16 – 4.08 (m, 2H; H6 and H8), 4.01 (d, *J* = 8.2 Hz, 1H; NH), 3.51 (td, *J* = 8.2, 3.0 Hz, 1H; H5), 3.41 (dd, *J* = 6.3, 1.3 Hz, 1H; H7), 2.70 (d, *J* = 6.6 Hz, 1H; OH), 1.49 (s, 3H; C(CH<sub>3</sub>)<sub>2</sub>), 1.29 (d, *J* = 6.3 Hz, 3H; H9), 1.24 (s, 3H; C(CH<sub>3</sub>)<sub>2</sub>), 1.21 (s, 9H; *t*BuS(O)N), 1.09 (s, 9H; TBDPS), 0.88 (s, 9H; TBS), 0.11 (s, 3H; TBS), 0.10 (s, 3H; TBS). <sup>13</sup>C NMR (126 MHz, CDCl<sub>3</sub>) δ 162.2 (C1), 137.7 (C2), 136.2 (TBDPS), 136.1 (TBDPS), 133.2 (TBDPS), 132.8 (TBDPS), 130.1 (TBDPS), 130.0 (TBDPS), 127.9 (TBDPS), 127.7 (TBDPS), 111.6 (C(CH<sub>3</sub>)<sub>2</sub>), 109.0 (C3), 71.1 (C4), 70.0 (C6), 69.4 (C8), 67.1 (C7), 62.6 (C5), 56.6 ((CH<sub>3</sub>)<sub>3</sub>CS(O)N), 27.2 (TBDPS), 26.6 (C(CH<sub>3</sub>)<sub>2</sub>), 26.5 (C(CH<sub>3</sub>)<sub>2</sub>), 25.9 (TBS), 22.9 ((CH<sub>3</sub>)<sub>3</sub>CS(O)N), 21.4 (C9), 19.5 (TBDPS), 18.0 (TBS), -4.2 (TBS), -4.9 (TBS). HRMS (ESI<sup>+</sup>): *m/z* calcd for C<sub>38</sub>H<sub>60</sub>N<sub>4</sub>O<sub>7</sub>SSi<sub>2</sub>Na<sup>+</sup>: 795.36135 [*M*+Na]<sup>+</sup>; found: 795.36352.

**Table S4.** Unsuccessfully utilized aldehydes

| Entry <sup>[a]</sup> | Sulfinimine |        | Aldehyde  |        | Deviations from General Procedure <b>A</b> | Yield, % <sup>[b]</sup> |
|----------------------|-------------|--------|-----------|--------|--------------------------------------------|-------------------------|
|                      | Structure   | equiv. | Structure | equiv. |                                            |                         |



|   |     |                                                                                   |     |                                                                  |     |
|---|-----|-----------------------------------------------------------------------------------|-----|------------------------------------------------------------------|-----|
| 1 | 1.5 |  | 1.0 | Sml <sub>2</sub> (2.0 equiv.),<br>-78 °C, 5h                     | <3  |
| 2 | 1.0 |  | 1.5 | -78 °C, 5h and slowly<br>warmed to room<br>temperature overnight | <5  |
| 3 | 1.0 |  | 1.5 | -78 °C, 5h and slowly<br>warmed to room<br>temperature overnight | <5  |
| 4 | 1.0 |  | 1.5 | -                                                                | <13 |
| 5 | 1.5 |  | 1.0 | Sml <sub>2</sub> (2.0 equiv.),<br>-78 °C, 5h                     | <4  |
| 6 | 1.0 |  | 1.5 | -78 °C, 5h and slowly<br>warmed to room<br>temperature overnight | <2  |

[a] Followed General Procedure A. [b] Based on crude <sup>1</sup>H NMR.

## Determination of Absolute Configuration

### 8-*epi*-Acinetaminic acids derivative

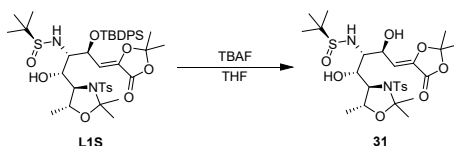

Compound **L1S** (10.1 mg, 12.2 μmol, 1.0 equiv.) was dissolved in dry THF (1.0 mL) under N<sub>2</sub> atmosphere and a solution of TBAF (20 μL, 1.0 M, 20 μmol, 1.6 equiv.) was added dropwise. The reaction was stirred at room temperature for 45 min. Afterwards, the mixture was concentrated on silica gel and purified using Büchi Pure C-815 Flash system (FlashPure EcoFlex Silica 12 g column, eluent: 63% : 37% EtOAc/Heptane → 100% EtOAc) to yield desired product **31** (7.2 mg, quantitatively) as a yellowish oil.

Data for **31**: Yellowish oil; *R*<sub>f</sub>=0.12 (Heptane/EtOAc 1:3); <sup>1</sup>H NMR (500 MHz, CDCl<sub>3</sub>) δ 7.76 – 7.71 (m, 2H; Ts), 7.26 – 7.23 (m, 2H; Ts), 5.98 (d, *J* = 8.0 Hz, 1H; H3), 5.09 (dd, *J* = 8.0, 2.3 Hz, 1H; H4), 4.47 (p, *J* = 6.1 Hz, 1H; H8), 4.35 (d, *J* = 9.6 Hz, 1H; H6), 3.99 (d, *J* = 10.7 Hz, 1H; NH), 3.86 (br, 2H; OH), 3.69 (dd, *J* = 5.4, 2.7 Hz, 1H; H7), 3.41 (td, *J* = 9.8, 2.3 Hz, 1H; H5), 2.41 (s, 3H; Ts), 1.65 (s, 9H; 3 x C(CH<sub>3</sub>)<sub>2</sub>), 1.61 (s, 3H; C(CH<sub>3</sub>)<sub>2</sub>), 1.22 – 1.18 (m, 12H; H9 and tBuS(O)N). <sup>13</sup>C NMR (126 MHz, CDCl<sub>3</sub>) δ 162.6 (C1), 143.9 (Ts), 139.4 (C2), 137.7 (Ts), 129.8 (Ts), 127.7 (Ts), 112.1 (C(CH<sub>3</sub>)<sub>2</sub>), 108.8 (C3), 98.0 (C(CH<sub>3</sub>)<sub>2</sub>), 72.5 (C6), 71.4 (C8), 67.5 (C4), 67.1 (C7), 61.1 (C5), 56.8 ((CH<sub>3</sub>)<sub>3</sub>CS(O)N), 29.8 (C(CH<sub>3</sub>)<sub>2</sub>), 27.5 (C(CH<sub>3</sub>)<sub>2</sub>), 26.9 (C(CH<sub>3</sub>)<sub>2</sub>), 26.9 (C(CH<sub>3</sub>)<sub>2</sub>), 22.9 ((CH<sub>3</sub>)<sub>3</sub>CS(O)N), 21.9 (C9), 21.7 (Ts). HRMS (ESI+): *m/z* calcd for C<sub>26</sub>H<sub>40</sub>N<sub>2</sub>O<sub>9</sub>S<sub>2</sub>Na<sup>+</sup>: 611.20674 [*M*+Na]<sup>+</sup>; found: 611.21274.

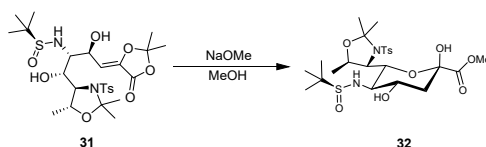

Compound **31** (7.2 mg, 12 μmol, 1.0 equiv.) was dissolved in dry MeOH (1.0 mL) under N<sub>2</sub> atmosphere and a solution of NaOMe (20 μL, 0.3 M, 6.0 μmol, 0.5 equiv.) was added dropwise. The reaction was stirred at room temperature for 3h. Afterwards, the mixture was quenched with sat. NH<sub>4</sub>Cl (20 μL), concentrated on silica gel and purified using Büchi Pure C-815 Flash system (FlashPure EcoFlex Silica 12 g column, eluent: 100% EtOAc → 10% : 90% MeOH/EtOAc) to yield desired product **32** (4.4 mg, 64%) as a yellowish oil.

Data for **32**: Yellowish oil; *R*<sub>f</sub>=0.34 (Heptane/EtOAc 1:3); <sup>1</sup>H NMR (500 MHz, CDCl<sub>3</sub>) δ 7.77 – 7.69 (m, 2H; Ts), 7.30 – 7.27 (m, 2H; Ts), 4.52 (dd, *J* = 11.2, 1.7 Hz, 1H; H6<sub>ax</sub>), 4.45 (p, *J* = 6.1 Hz, 1H; H8), 4.05 (dd, *J* = 5.7, 1.7 Hz, 1H; H7), 3.88 – 3.83 (m, 1H; H4<sub>ax</sub>), 3.82

(s, 3H; OMe), 3.21 (d,  $J$  = 11.2 Hz, 1H; NH), 2.83 (td,  $J$  = 11.1, 8.5 Hz, 1H; H5<sub>ax</sub>), 2.43 (s, 3H; Ts), 2.28 (dd,  $J$  = 13.2, 5.2 Hz, 1H; H3<sub>eq</sub>), 2.06 (dd,  $J$  = 13.2, 11.3 Hz, 1H; H3<sub>ax</sub>), 1.63 (br, 2H, 2 x OH), 1.56 (s, 3H; C(CH<sub>3</sub>)<sub>2</sub>), 1.44 (s, 3H; C(CH<sub>3</sub>)<sub>2</sub>), 1.28 (s, 9H; *t*BuS(O)N), 1.24 (d,  $J$  = 6.1 Hz, 3H; H9). <sup>13</sup>C NMR (126 MHz, CDCl<sub>3</sub>)  $\delta$  169.9 (C1), 143.7 (Ts), 138.8 (Ts), 129.7 (Ts), 127.5 (Ts), 97.6 (C(CH<sub>3</sub>)<sub>2</sub>), 94.9 (C2), 71.8 (C6), 70.4 (C8), 69.3 (C4), 65.0 (C7), 63.2 (C5), 56.7 ((CH<sub>3</sub>)<sub>3</sub>CS(O)N), 53.4 (OMe), 37.4 (C3), 28.4 (C(CH<sub>3</sub>)<sub>2</sub>), 27.7 (C(CH<sub>3</sub>)<sub>2</sub>), 22.9 ((CH<sub>3</sub>)<sub>3</sub>CS(O)N), 22.3 (C9), 21.7 (Ts). HRMS (ESI<sup>+</sup>):  $m/z$  calcd for C<sub>24</sub>H<sub>38</sub>N<sub>2</sub>O<sub>9</sub>S<sub>2</sub>Na<sup>+</sup>: 585.19109 [ $M$ +Na]<sup>+</sup>; found: 585.19363.

#### 8-*epi*-Legionaminic acids derivative

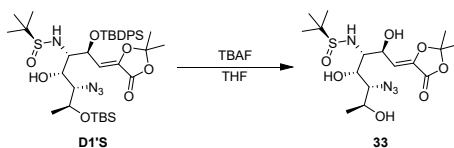

Compound **D1'S** (15.7 mg, 20.3  $\mu$ mol, 1.0 equiv.) was dissolved in dry THF (1.0 mL) under N<sub>2</sub> atmosphere and a solution of TBAF (60  $\mu$ L, 1.0 M, 60  $\mu$ mol, 3.0 equiv.) was added dropwise. The reaction was stirred at room temperature for 45 min. Afterwards, the mixture was concentrated on silica gel and purified using Büchi Pure C-815 Flash system (FlashPure EcoFlex Silica 12 g column, eluent: EtOAc) to yield desired product **33** (7.8 mg, 91%) as a yellowish oil.

Data for **33**: Yellowish oil;  $R_f$ =0.46 (EtOAc/MeOH 9:1); <sup>1</sup>H NMR (500 MHz, CDCl<sub>3</sub>)  $\delta$  5.90 (d,  $J$  = 8.5 Hz, 1H; H3), 4.93 (dd,  $J$  = 8.4, 3.5 Hz, 1H; H4), 4.24 – 4.17 (m, 1H; H8), 4.00 (d,  $J$  = 9.8 Hz, 1H; NH), 3.93 (d,  $J$  = 8.4 Hz, 1H; H6), 3.65 (br, 1H; OH), 3.57 (ddd,  $J$  = 9.6, 8.0, 3.5 Hz, 1H; H5), 3.50 (br, 1H; OH), 3.34 (dd,  $J$  = 4.3, 1.9 Hz, 1H; H7), 2.54 (br, 1H; OH), 1.67 (s, 3H; C(CH<sub>3</sub>)<sub>2</sub>), 1.66 (s, 3H; C(CH<sub>3</sub>)<sub>2</sub>), 1.36 (d,  $J$  = 6.5 Hz, 3H; H9), 1.27 (s, 9H; *t*BuS(O)N). <sup>13</sup>C NMR (126 MHz, CDCl<sub>3</sub>)  $\delta$  162.2 (C1), 139.7 (C2), 112.2 (C(CH<sub>3</sub>)<sub>2</sub>), 108.2 (C3), 74.4 (C6), 71.4 (C8), 66.7 (C4), 66.2 (C7), 62.7 (C5), 56.8 ((CH<sub>3</sub>)<sub>3</sub>CS(O)N), 27.0 (C(CH<sub>3</sub>)<sub>2</sub>), 27.0 (C(CH<sub>3</sub>)<sub>2</sub>), 23.0 ((CH<sub>3</sub>)<sub>3</sub>CS(O)N), 21.2 (C9). HRMS (ESI<sup>+</sup>):  $m/z$  calcd for C<sub>16</sub>H<sub>28</sub>N<sub>4</sub>O<sub>7</sub>SN<sup>+</sup>: 443.15709 [ $M$ +Na]<sup>+</sup>; found: 443.15939.

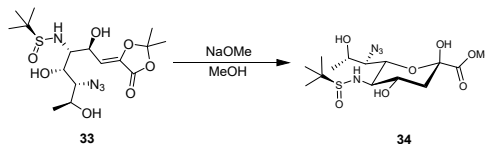

Compound **33** (6.8 mg, 16  $\mu$ mol, 1.0 equiv.) was dissolved in dry MeOH (1.0 mL) under N<sub>2</sub> atmosphere and a solution of NaOMe (50  $\mu$ L, 0.15 M, 7.5  $\mu$ mol, 0.5 equiv.) was added dropwise. The reaction was stirred at room temperature for 0.5h. Afterwards, the mixture was quenched with sat. NH<sub>4</sub>Cl (20  $\mu$ L), concentrated on silica gel and purified using Büchi Pure C-815 Flash system (FlashPure EcoFlex Silica 12 g column, eluent: 100% EtOAc  $\rightarrow$  4% : 96% MeOH/EtOAc) to yield desired product **34** (3.5 mg, 55%) as a colorless oil.

Data for **34**: Colorless oil;  $R_f$ =0.56 (EtOAc/MeOH 9:1); <sup>1</sup>H NMR (500 MHz, CDCl<sub>3</sub>)  $\delta$  4.15 – 4.05 (m, 2H; H8 and OH), 3.96 (dd,  $J$  = 10.1, 2.1 Hz, 1H; H6<sub>ax</sub>), 3.88 – 3.82 (m, 4H; H4<sub>ax</sub> and OMe), 3.40 – 3.34 (m, 2H; H5<sub>ax</sub> and H7), 2.99 (d,  $J$  = 10.7 Hz, 1H; NH), 2.24 (dd,  $J$  = 13.2, 5.1 Hz, 1H; H3<sub>eq</sub>), 2.14 (dd,  $J$  = 13.2, 11.2 Hz, 1H; H3<sub>ax</sub>), 1.29 (s, 9H; *t*BuS(O)N), 1.26 (d,  $J$  = 6.4 Hz, 3H; H9). <sup>13</sup>C NMR (126 MHz, CDCl<sub>3</sub>)  $\delta$  170.3 (C1), 94.9 (C2), 73.5 (C6), 69.2 (C8), 68.5 (C4), 66.0 (C7), 62.5 (C5), 56.5 ((CH<sub>3</sub>)<sub>3</sub>CS(O)N), 54.0 (OMe), 37.7 (C3), 22.9 ((CH<sub>3</sub>)<sub>3</sub>CS(O)N), 20.1 (C9). HRMS (ESI<sup>+</sup>):  $m/z$  calcd for C<sub>14</sub>H<sub>27</sub>N<sub>4</sub>O<sub>7</sub>S<sup>+</sup>: 395.15950 [ $M$ +H]<sup>+</sup>; found: 395.16072.

#### Legionaminic acids derivative

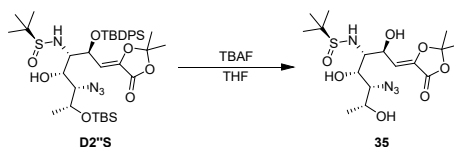

Compound **D2'S** (17.5 mg, 22.6  $\mu$ mol, 1.0 equiv.) was dissolved in dry THF (1.0 mL) under N<sub>2</sub> atmosphere and a solution of TBAF (70  $\mu$ L, 1.0 M, 70  $\mu$ mol, 3.1 equiv.) was added dropwise. The reaction was stirred at room temperature for 1h. Afterwards, the mixture was concentrated on silica gel and purified using Büchi Pure C-815 Flash system (FlashPure EcoFlex Silica 12 g column, eluent: eluent: 100% EtOAc  $\rightarrow$  4% : 96% MeOH/EtOAc) to yield desired product **35** (5.5 mg, 58%) as a white solid.

Data for **35**: White solid;  $R_f$ =0.54 (EtOAc/MeOH 9:1); <sup>1</sup>H NMR (500 MHz, CDCl<sub>3</sub>)  $\delta$  5.91 (d,  $J$  = 8.2 Hz, 1H; H3), 5.00 (dd,  $J$  = 8.2, 3.0 Hz, 1H; H4), 4.20 – 4.13 (m, 2H; H6 and H8), 4.09 – 3.93 (m, 2H; NH and OH), 3.82 (br, 1H; OH), 3.60 (td,  $J$  = 9.3, 2.9 Hz, 1H; H5), 3.34 – 3.04 (m, 2H; H7 and OH), 1.66 (s, 3H; C(CH<sub>3</sub>)<sub>2</sub>), 1.66 (s, 3H; C(CH<sub>3</sub>)<sub>2</sub>), 1.37 (d,  $J$  = 6.3 Hz, 3H; H9), 1.26 (s, 9H; *t*BuS(O)N). <sup>13</sup>C NMR (126 MHz, CDCl<sub>3</sub>)  $\delta$  162.5 (C1), 139.4 (C2), 112.3 (C(CH<sub>3</sub>)<sub>2</sub>), 108.7 (C3), 70.7 (C6), 67.6 (C8), 66.7 (C4), 66.5 (C7), 62.5 (C5), 57.0 ((CH<sub>3</sub>)<sub>3</sub>CS(O)N), 26.9 (C(CH<sub>3</sub>)<sub>2</sub>), 26.9 (C(CH<sub>3</sub>)<sub>2</sub>), 23.0 ((CH<sub>3</sub>)<sub>3</sub>CS(O)N), 21.1 (C9). HRMS (ESI<sup>+</sup>):  $m/z$  calcd for C<sub>16</sub>H<sub>28</sub>N<sub>4</sub>O<sub>7</sub>SN<sup>+</sup>: 443.15709 [ $M$ +Na]<sup>+</sup>; found: 443.15941.

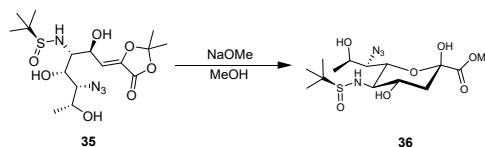

Compound **35** (4.9 mg, 11.7  $\mu$ mol, 1.0 equiv.) was dissolved in dry MeOH (1.0 mL) under N<sub>2</sub> atmosphere and a solution of NaOMe (40  $\mu$ L, 0.15 M, 6.0  $\mu$ mol, 0.5 equiv.) was added dropwise. The reaction was stirred at room temperature for 20 min. Afterwards, the mixture was quenched with sat. NH<sub>4</sub>Cl (20  $\mu$ L), concentrated on silica gel and purified using Büchi Pure C-815 Flash system (FlashPure EcoFlex Silica 12 g column, eluent: 100% EtOAc  $\rightarrow$  4% : 96% MeOH/EtOAc) to yield desired product **36** (4.2 mg, 91%) as a colorless oil.

Data for **35**: Colorless oil;  $R_f$ =0.54 (EtOAc/MeOH 9:1); <sup>1</sup>H NMR (500 MHz, CDCl<sub>3</sub>)  $\delta$  4.28 (dd,  $J$  = 10.3, 1.9 Hz, 1H; H6<sub>ax</sub>), 4.11 – 4.02 (m, 1H; H8), 3.91 (ddd,  $J$  = 11.3, 9.1, 5.0 Hz, 1H; H4<sub>ax</sub>), 3.84 (s, 3H; OMe), 3.34 (q,  $J$  = 10.2 Hz, 1H; H5<sub>ax</sub>), 3.27 – 3.10 (m, 2H; H7 and NH), 2.27 (dd,  $J$  = 13.1, 5.0 Hz, 1H; H3<sub>eq</sub>), 2.12 (dd,  $J$  = 13.3, 11.3 Hz, 1H; H3<sub>ax</sub>), 1.37 (d,  $J$  = 6.3 Hz, 3H; H9), 1.28 (s, 9H; *t*BuS(O)N). <sup>13</sup>C NMR (126 MHz, CDCl<sub>3</sub>)  $\delta$  170.6 (C1), 95.2 (C2), 71.3 (C6), 68.5 (C4), 66.0 (C8), 65.0 (C7), 62.3 (C5), 56.6 ((CH<sub>3</sub>)<sub>3</sub>CS(O)N), 53.7 (OMe), 37.8 (C3), 22.9 ((CH<sub>3</sub>)<sub>3</sub>CS(O)N), 21.5 (C9). HRMS (ESI<sup>+</sup>):  $m/z$  calcd for C<sub>14</sub>H<sub>26</sub>N<sub>4</sub>O<sub>7</sub>SN<sup>+</sup>: 417.14144 [ $M$ +Na]<sup>+</sup>; found: 417.14188.

## 6,7-*epi*-Pseudaminic acids derivative

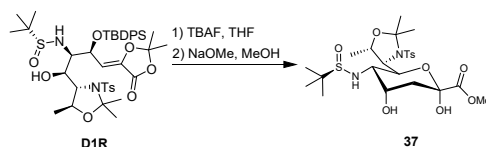

Compound **D1R** (dr 10:1) (15.5 mg, 18.7  $\mu$ mol, 1.0 equiv.) was dissolved in dry THF (1.0 mL) under N<sub>2</sub> atmosphere, cooled in an ice bath and a solution of TBAF (20  $\mu$ L, 1.0 M, 20  $\mu$ mol, 1.1 equiv.) was added dropwise. After 35 min, the reaction mixture was diluted with MeOH (1.0 mL) and a solution of NaOMe (30  $\mu$ L, 0.3 M, 9.0  $\mu$ mol, 0.5 equiv.) was added dropwise. The reaction was stirred at room temperature for 4h. Afterwards, the mixture was poured into sat. NH<sub>4</sub>Cl/EtOAc (15 mL; 1:2) and the water layer was additionally extracted twice with EtOAc (10 mL). The combined organic layers were dried over Na<sub>2</sub>SO<sub>4</sub>, filtered, concentrated and purified using Büchi Pure C-810 Flash system (FlashPure EcoFlex Silica 12 g column, eluent: 36% : 64% Heptane/EtOAc  $\rightarrow$  100% EtOAc) to yield a mixture of two diastereomers (7.8 mg, 74%), where desired product **37** is a major diastereomer (dr 10:1).

Data for **37** (major diastereomer): Colorless oil;  $R_f$ =0.37 (EtOAc); <sup>1</sup>H NMR (500 MHz, CDCl<sub>3</sub>)  $\delta$  7.81 – 7.74 (m, 2H; Ts), 7.31 – 7.25 (m, 2H; Ts), 4.79 (br, 1H; OH), 4.67 (dd,  $J$  = 11.3, 1.7 Hz, 1H; H6<sub>ax</sub>), 4.47 (p,  $J$  = 6.2 Hz, 1H; H8), 4.35 (q,  $J$  = 3.3 Hz, 1H; H4<sub>eq</sub>), 4.17 (d,  $J$  = 10.2 Hz, 1H; NH), 3.99 (dd,  $J$  = 5.4, 1.7 Hz, 1H; H7), 3.80 (s, 3H; OMe), 3.12 (ddd,  $J$  = 11.2, 10.2, 3.3 Hz, 1H; H5<sub>ax</sub>), 2.43 (s, 3H; Ts), 2.30 (dd,  $J$  = 14.6, 3.2 Hz, 1H; H3), 2.26 (dd,  $J$  = 14.7, 3.3 Hz, 1H; H3'), 1.73 (br, 1H; OH), 1.59 (s, 3H; C(CH<sub>3</sub>)<sub>2</sub>), 1.45 (s, 3H; C(CH<sub>3</sub>)<sub>2</sub>), 1.26 – 1.23 (m, 12H; H9 and *t*BuS(O)N). <sup>13</sup>C NMR (126 MHz, CDCl<sub>3</sub>)  $\delta$  169.0 (C1), 143.7 (Ts), 138.3 (Ts), 129.7 (Ts), 127.8 (Ts), 97.6 (C(CH<sub>3</sub>)<sub>2</sub>), 95.1 (C2), 70.4 (C8), 68.3 (C6), 67.6 (C4), 65.0 (C7), 56.7 ((CH<sub>3</sub>)<sub>3</sub>CS(O)N), 56.3 (C5), 53.2 (OMe), 35.5 (C3), 28.4 (C(CH<sub>3</sub>)<sub>2</sub>), 27.9 (C(CH<sub>3</sub>)<sub>2</sub>), 22.8 ((CH<sub>3</sub>)<sub>3</sub>CS(O)N), 22.3 (C9), 21.7 (Ts). HRMS (ESI<sup>+</sup>):  $m/z$  calcd for C<sub>24</sub>H<sub>38</sub>N<sub>2</sub>O<sub>9</sub>S<sub>2</sub>Na<sup>+</sup>: 585.19109 [ $M$ +Na]<sup>+</sup>; found: 585.19304.

## 6-*epi*-Pseudaminic acids derivative

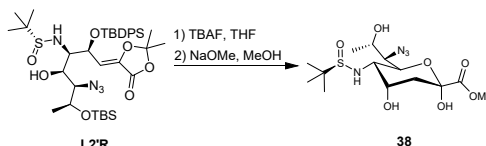

Compound **L2'R** (dr 10:1:2) (12.1 mg, 15.6  $\mu$ mol, 1.0 equiv.) was dissolved in dry THF (1.0 mL) under N<sub>2</sub> atmosphere, cooled in an ice bath and a solution of TBAF (40  $\mu$ L, 1.0 M, 40  $\mu$ mol, 2.5 equiv.) was added dropwise. After 3.5h, the reaction mixture was concentrated *in vacuo*, dissolved in MeOH (1.0 mL) under N<sub>2</sub> atmosphere and a solution of NaOMe (30  $\mu$ L, 0.3 M, 9.0  $\mu$ mol, 0.6 equiv.) was added dropwise. The reaction was stirred at room temperature for 6 days. Afterwards, the mixture was quenched with sat. NH<sub>4</sub>Cl (30  $\mu$ L), concentrated on silica gel and purified using Büchi Pure C-815 Flash system (FlashPure EcoFlex Silica 4 g column, eluent: 100% EtOAc  $\rightarrow$  4% : 96% MeOH/EtOAc) to yield a mixture of two diastereomers (3.4 mg, 55%), where desired product **38** is a major diastereomer (dr 10:1).

Data for **38** (major diastereomer): Yellowish oil;  $R_f$ =0.55 (EtOAc/MeOH 9:1); <sup>1</sup>H NMR (500 MHz, CDCl<sub>3</sub>)  $\delta$  4.46 (dd,  $J$  = 10.5, 2.1 Hz, 1H; H6<sub>ax</sub>), 4.43 (q,  $J$  = 3.4 Hz, 1H; H4<sub>eq</sub>), 4.15 – 4.06 (m, 1H; H8), 3.81 (s, 3H; OMe), 3.61 (td,  $J$  = 10.4, 3.1 Hz, 1H; H5<sub>ax</sub>), 3.21 (dd,  $J$  = 8.5, 2.1 Hz, 1H; H7), 2.34 (dd,  $J$  = 14.6, 3.1 Hz, 1H; H3), 2.25 (dd,  $J$  = 14.6, 3.3 Hz, 1H; H3'), 1.39 (d,  $J$  = 6.3 Hz, 3H; H9), 1.26 (s, 9H; *t*BuS(O)N). <sup>13</sup>C NMR (126 MHz, CDCl<sub>3</sub>)  $\delta$  169.3 (C1), 95.2 (C2), 67.7 (C4), 67.5 (C6), 66.1 (C8), 65.4 (C7), 56.9 ((CH<sub>3</sub>)<sub>3</sub>CS(O)N), 56.2 (C5), 53.4 (OMe), 35.9 (C3), 22.9 ((CH<sub>3</sub>)<sub>3</sub>CS(O)N), 21.3 (C9). HRMS (ESI<sup>+</sup>):  $m/z$  calcd for C<sub>14</sub>H<sub>26</sub>N<sub>4</sub>O<sub>7</sub>SN<sup>+</sup>: 417.14144 [ $M$ +Na]<sup>+</sup>; found: 417.14259.

## Selective Deprotection and Reactivity

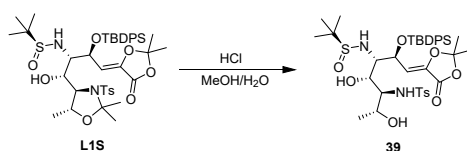

Compound **L1S** (32.9 mg, 39.8  $\mu$ mol, 1.0 equiv.) was dissolved in MeOH (0.8 mL) and a solution of HCl (40  $\mu$ L, 0.1 M, 4  $\mu$ mol, 0.1 equiv.) in H<sub>2</sub>O was added dropwise. The reaction was stirred at room temperature for 4 days. Afterwards, the mixture was concentrated *in vacuo* and purified using Büchi Pure C-815 Flash system (FlashPure EcoFlex Silica 12 g column, eluent: 62% : 38% EtOAc/Heptane  $\rightarrow$  100% EtOAc) to yield desired product **39** (29.3 mg, 94%) as a colorless oil.

Data for **39**: Colorless oil;  $R_f$ =0.45 (EtOAc/Heptane 3:1); <sup>1</sup>H NMR (500 MHz, CDCl<sub>3</sub>)  $\delta$  7.79 – 7.74 (m, 2H; Ts), 7.73 – 7.69 (m, 2H; TBDPS), 7.58 – 7.54 (m, 2H; TBDPS), 7.54 – 7.51 (m, 1H; TBDPS), 7.50 – 7.46 (m, 2H; TBDPS), 7.42 – 7.38 (m, 1H; TBDPS), 7.35 – 7.30 (m, 2H; TBDPS), 7.27 – 7.23 (m, 2H; Ts), 6.07 (d,  $J$  = 9.5 Hz, 1H; H<sub>3</sub>), 5.35 (d,  $J$  = 8.5 Hz, 1H; TsNH), 5.00 (dd,  $J$  = 9.3, 1.4 Hz, 1H; H<sub>4</sub>), 4.19 (d,  $J$  = 8.8 Hz, 1H; tBuS(O)NH), 4.07 (q,  $J$  = 6.2 Hz, 1H; H<sub>8</sub>), 3.71 (ddd,  $J$  = 10.7, 6.2, 2.3 Hz, 1H; H<sub>6</sub>), 3.38 (dd,  $J$  = 8.4, 3.2 Hz, 1H; H<sub>7</sub>), 3.10 (ddd,  $J$  = 10.4, 8.8, 1.5 Hz, 1H; H<sub>5</sub>), 2.94 (s, 1H; OH), 2.39 (s, 3H; Ts), 2.26 (br, 1H; NH), 1.48 (s, 3H; C(CH<sub>3</sub>)<sub>2</sub>), 1.24 (s, 9H; tBuS(O)N), 1.14 (s, 3H; C(CH<sub>3</sub>)<sub>2</sub>), 1.07 (s, 9H; TBDPS), 0.77 (d,  $J$  = 6.3 Hz, 3H; H<sub>9</sub>). <sup>13</sup>C NMR (126 MHz, CDCl<sub>3</sub>)  $\delta$  161.9 (C<sub>1</sub>), 143.6 (Ts), 138.9 (C<sub>2</sub>), 138.2 (Ts), 136.4 (TBDPS), 136.1 (TBDPS), 132.6 (TBDPS), 132.4 (TBDPS), 130.7 (TBDPS), 130.2 (TBDPS), 129.8 (Ts), 128.3 (TBDPS), 127.7 (TBDPS), 127.0 (Ts), 111.5 (C(CH<sub>3</sub>)<sub>2</sub>), 107.6 (C<sub>3</sub>), 76.1 (C<sub>6</sub>), 66.4 (C<sub>4</sub>), 65.7 (C<sub>8</sub>), 61.4 (C<sub>5</sub>), 56.6 ((CH<sub>3</sub>)<sub>3</sub>CS(O)N), 56.1 (C<sub>7</sub>), 27.2 (TBDPS), 26.9 (C(CH<sub>3</sub>)<sub>2</sub>), 26.3 (C(CH<sub>3</sub>)<sub>2</sub>), 23.0 ((CH<sub>3</sub>)<sub>3</sub>CS(O)N), 21.7 (Ts), 19.7 (C<sub>9</sub>), 19.2 (TBDPS). HRMS (ESI<sup>+</sup>):  $m/z$  calcd for C<sub>39</sub>H<sub>54</sub>N<sub>2</sub>O<sub>9</sub>S<sub>2</sub>SiNa<sup>+</sup>: 809.29322 [ $M$ +Na]<sup>+</sup>; found: 809.29502.

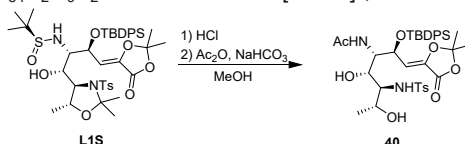

Compound **L1S** (32.6 mg, 39.4  $\mu$ mol, 1.0 equiv.) was dissolved in MeOH (0.3 mL) and a solution of HCl (1.0 mL, 0.2 M, 0.20 mmol, 5.0 equiv.) in MeOH was added dropwise. The reaction was stirred at room temperature for 24h followed by concentration *in vacuo*. To the crude, NaHCO<sub>3</sub> (26.6 mg, 0.315 mmol, 8.0 equiv.) was added. The mixture was suspended in MeOH (0.5 mL) and a solution of Ac<sub>2</sub>O (0.50 mL, 0.1 M, 50  $\mu$ mol, 1.25 equiv.) in MeOH was added dropwise. The reaction was stirred at room temperature for 3h. Afterwards, the reaction mixture was concentrated on silica gel and purified using Büchi Pure C-815 Flash system (FlashPure EcoFlex Silica 12 g column, eluent: 63% : 37% EtOAc/Heptane  $\rightarrow$  100% EtOAc) to yield desired product **40** (23.7 mg, 83%) as a yellowish oil.

Data for **40**: Yellowish oil;  $R_f$ =0.34 (EtOAc/Heptane 3:1); <sup>1</sup>H NMR (500 MHz, CDCl<sub>3</sub>)  $\delta$  7.79 – 7.74 (m, 2H; TBDPS), 7.71 – 7.66 (m, 2H; Ts), 7.60 – 7.56 (m, 2H; TBDPS), 7.54 – 7.46 (m, 3H; TBDPS), 7.45 – 7.41 (m, 1H; TBDPS), 7.37 – 7.33 (m, 2H; TBDPS), 7.28 – 7.26 (m, 2H; Ts), 5.99 (d,  $J$  = 9.0 Hz, 1H; AcNH), 5.58 (d,  $J$  = 9.0 Hz, 1H; H<sub>3</sub>), 5.41 (d,  $J$  = 7.6 Hz, 1H; TsNH), 4.99 (dd,  $J$  = 9.1, 1.5 Hz, 1H; H<sub>4</sub>), 4.23 – 4.16 (m, 1H; H<sub>8</sub>), 3.90 – 3.80 (m, 2H; H<sub>5</sub> and H<sub>6</sub>), 2.91 (d,  $J$  = 7.6 Hz, 1H; H<sub>7</sub>), 2.87 (d,  $J$  = 2.2 Hz, 1H; OH), 2.39 (s, 3H; Ts), 2.23 (d,  $J$  = 5.4 Hz, 1H; OH), 2.07 (s, 3H; Ac), 1.51 (s, 3H; C(CH<sub>3</sub>)<sub>2</sub>), 1.21 (s, 3H; C(CH<sub>3</sub>)<sub>2</sub>), 1.10 (s, 9H; TBDPS), 0.62 (d,  $J$  = 6.3 Hz, 3H; H<sub>9</sub>). <sup>13</sup>C NMR (126 MHz, CDCl<sub>3</sub>)  $\delta$  170.1 (Ac), 162.2 (C<sub>1</sub>), 143.7 (Ts), 138.7 (C<sub>2</sub>), 137.5 (Ts), 136.2 (TBDPS), 136.1 (TBDPS), 132.6 (TBDPS), 132.6 (TBDPS), 130.8 (TBDPS), 130.3 (TBDPS), 129.8 (Ts), 128.4 (TBDPS), 127.8 (TBDPS), 127.1 (Ts), 112.0 (C(CH<sub>3</sub>)<sub>2</sub>), 107.5 (C<sub>3</sub>), 76.1 (C<sub>6</sub>), 66.2 (C<sub>4</sub>), 65.7 (C<sub>8</sub>), 56.9 (C<sub>7</sub>), 54.6 (C<sub>5</sub>), 27.3 (TBDPS), 26.8 (C(CH<sub>3</sub>)<sub>2</sub>), 26.4 (C(CH<sub>3</sub>)<sub>2</sub>), 23.5 (Ac), 21.6 (Ts), 19.6 (C<sub>9</sub>), 19.3 (TBDPS). HRMS (ESI<sup>+</sup>):  $m/z$  calcd for C<sub>37</sub>H<sub>48</sub>N<sub>2</sub>O<sub>9</sub>SSiNa<sup>+</sup>: 747.27420 [ $M$ +Na]<sup>+</sup>; found: 747.27518.

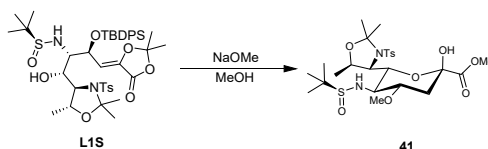

Compound **L1S** (101 mg, 0.122 mmol, 1.0 equiv.) was dissolved in dry MeOH (0.28 mL) and a solution of NaOMe (0.20 mL, 0.3 M, 60  $\mu$ mol, 0.5 equiv.) was added dropwise. The reaction was stirred at room temperature for 3h. Afterwards, the mixture was quenched with sat. NH<sub>4</sub>Cl (50  $\mu$ L), poured into H<sub>2</sub>O/EtOAc (25 mL, 2:3) and the water layer was additionally extracted twice with EtOAc (15 mL). The combined organic layers were dried over Na<sub>2</sub>SO<sub>4</sub>, filtered, concentrated and purified using Büchi Pure C-815 Flash system (FlashPure EcoFlex Silica 12 g column, eluent: 79% : 21% EtOAc/Heptane  $\rightarrow$  100% EtOAc) to yield product **41** (48.6 mg, 69%) as an off-white solid.

Data for **41**: Off-white solid;  $R_f$ =0.30 (EtOAc); <sup>1</sup>H NMR (500 MHz, CDCl<sub>3</sub>)  $\delta$  7.77 – 7.71 (m, 2H; Ts), 7.29 – 7.26 (m, 2H; Ts), 4.48 (dd,  $J$  = 11.0, 1.7 Hz, 1H; H<sub>6ax</sub>), 4.42 (qd,  $J$  = 6.3, 4.8 Hz, 1H; H<sub>8</sub>), 4.10 (dd,  $J$  = 4.9, 1.6 Hz, 1H; H<sub>7</sub>), 4.01 (br, 1H; OH), 3.79 (s, 3H; COOMe), 3.58 (ddd,  $J$  = 11.2, 8.9, 5.0 Hz, 1H; H<sub>4ax</sub>), 3.42 (s, 3H; OMe), 3.25 (d,  $J$  = 9.3 Hz, 1H; NH), 2.90 (dt,  $J$  = 10.9, 9.1 Hz, 1H; H<sub>5ax</sub>), 2.42 – 2.38 (m, 4H; H<sub>3eq</sub> and Ts), 1.87 (dd,  $J$  = 13.1, 11.2 Hz, 1H; H<sub>3ax</sub>), 1.53 (s, 3H; C(CH<sub>3</sub>)<sub>2</sub>), 1.47 (s, 3H; C(CH<sub>3</sub>)<sub>2</sub>), 1.20 (s, 9H; tBuS(O)N), 1.19 (d,  $J$  = 6.3 Hz, 3H; H<sub>9</sub>). <sup>13</sup>C NMR (126 MHz, CDCl<sub>3</sub>)  $\delta$  169.7 (C<sub>1</sub>), 143.6 (Ts), 138.8 (Ts), 129.7 (Ts), 127.5 (Ts), 97.7 (C(CH<sub>3</sub>)<sub>2</sub>), 94.9 (C<sub>2</sub>), 78.2 (C<sub>4</sub>), 72.9 (C<sub>6</sub>), 70.8 (C<sub>8</sub>), 65.0 (C<sub>7</sub>), 58.5 (C<sub>5</sub>), 56.7 (OMe), 56.7 ((CH<sub>3</sub>)<sub>3</sub>CS(O)N), 53.3 (COOMe), 34.7 (C<sub>3</sub>), 28.7 (C(CH<sub>3</sub>)<sub>2</sub>), 27.9 (C(CH<sub>3</sub>)<sub>2</sub>), 22.8 ((CH<sub>3</sub>)<sub>3</sub>CS(O)N), 22.4 (C<sub>9</sub>), 21.6 (Ts). HRMS (ESI<sup>+</sup>):  $m/z$  calcd for C<sub>25</sub>H<sub>40</sub>N<sub>2</sub>O<sub>9</sub>S<sub>2</sub>Na<sup>+</sup>: 599.20674 [ $M$ +Na]<sup>+</sup>; found: 599.20620.

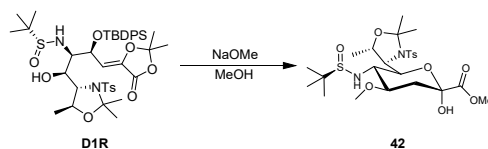

Compound **D1R** (dr 10:1) (28.2 mg, 31.1  $\mu$ mol, 1.0 equiv.) was dissolved in dry MeOH (0.42 mL) and a solution of NaOMe (60  $\mu$ L, 0.3 M, 18  $\mu$ mol, 0.5 equiv.) was added dropwise. The reaction was stirred at room temperature for 27h. Afterwards, the mixture was quenched with sat.  $\text{NH}_4\text{Cl}$  (50  $\mu$ L), poured into  $\text{H}_2\text{O}/\text{EtOAc}$  (25 mL, 2:3) and the water layer was additionally extracted twice with EtOAc (15 mL). The combined organic layers were dried over  $\text{Na}_2\text{SO}_4$ , filtered, concentrated and purified using Büchi Pure C-815 Flash system (FlashPure EcoFlex Silica 12 g column, eluent: 79% : 21% EtOAc/Heptane  $\rightarrow$  100% EtOAc) to yield a mixture of two diastereomers (9.1 mg, 46%), where product **42** is a major diastereomer (dr 14:1).

Data for **42** (major diastereomer): White solid;  $R_f$ =0.32 (EtOAc);  $^1\text{H}$  NMR (500 MHz,  $\text{CDCl}_3$ )  $\delta$  7.79 – 7.73 (m, 2H; Ts), 7.30 – 7.27 (m, 2H; Ts), 4.49 (dd,  $J$  = 11.0, 1.7 Hz, 1H;  $\text{H6}_{\text{ax}}$ ), 4.47 – 4.41 (m, 1H; H8), 4.12 (dd,  $J$  = 4.9, 1.7 Hz, 1H; H7), 3.82 (s, 3H; COOMe), 3.57 (ddd,  $J$  = 11.3, 8.9, 5.0 Hz, 1H; H4), 3.43 (s, 3H; OMe), 3.15 (d,  $J$  = 9.3 Hz, 1H; NH), 2.92 (dt,  $J$  = 11.0, 9.1 Hz, 1H;  $\text{H5}_{\text{ax}}$ ), 2.43 (s, 3H; Ts), 2.40 (dd,  $J$  = 13.0, 4.9 Hz, 1H;  $\text{H3}_{\text{eq}}$ ), 1.90 (t,  $J$  = 12.1 Hz, 1H;  $\text{H3}_{\text{ax}}$ ), 1.55 (s, 3H;  $\text{C}(\text{CH}_3)_2$ ), 1.48 (s, 3H;  $\text{C}(\text{CH}_3)_2$ ), 1.24 – 1.19 (m, 12H; H9 and  $t\text{BuS}(\text{O})\text{N}$ ).  $^{13}\text{C}$  NMR (126 MHz,  $\text{CDCl}_3$ )  $\delta$  169.7 (C1), 143.7 (Ts), 138.9 (Ts), 129.7 (Ts), 127.5 (Ts), 97.7 ( $\text{C}(\text{CH}_3)_2$ ), 94.9 (C2), 78.3 (C4), 72.9 (C6), 70.8 (C8), 65.1 (C7), 58.4 (C5), 56.8 (OMe), 56.7 ( $(\text{CH}_3)_3\text{CS}(\text{O})\text{N}$ ), 53.4 (COOMe), 34.7 (C3), 28.7 ( $\text{C}(\text{CH}_3)_2$ ), 28.0 ( $\text{C}(\text{CH}_3)_2$ ), 22.8 ( $(\text{CH}_3)_3\text{CS}(\text{O})\text{N}$ ), 22.4 (C9), 21.7 (Ts). HRMS (ESI $^+$ ):  $m/z$  calcd for  $\text{C}_{25}\text{H}_{41}\text{N}_2\text{O}_9\text{S}_2^+$ : 577.22480  $[M+\text{H}]^+$ ; found: 577.22794.

**mo\_D8V6585**

7 Y

PLATON-Dec 26 14:57:57 2024 - (191224)

NOMOVE FORCED

Prob = 50  
Temp = 100

Z -131 mo\_d8v6585 P 21 21 21 R = 0.03 RES= 0 -56 X

|                                      |                                                                               |
|--------------------------------------|-------------------------------------------------------------------------------|
| Identification code                  | mo_D8V6585                                                                    |
| Empirical formula                    | C <sub>29</sub> H <sub>50</sub> N <sub>2</sub> O <sub>10</sub> S <sub>2</sub> |
| Formula weight                       | 650.83                                                                        |
| Temperature/K                        | 100.0                                                                         |
| Crystal system                       | orthorhombic                                                                  |
| Space group                          | P2 <sub>1</sub> 2 <sub>1</sub> 2 <sub>1</sub>                                 |
| a/Å                                  | 12.0149(4)                                                                    |
| b/Å                                  | 16.4908(5)                                                                    |
| c/Å                                  | 17.1438(5)                                                                    |
| α/°                                  | 90                                                                            |
| β/°                                  | 90                                                                            |
| γ/°                                  | 90                                                                            |
| Volume/Å <sup>3</sup>                | 3396.79(18)                                                                   |
| Z                                    | 4                                                                             |
| ρ <sub>calc</sub> /g/cm <sup>3</sup> | 1.273                                                                         |
| μ/mm <sup>-1</sup>                   | 0.211                                                                         |
| F(000)                               | 1400.0                                                                        |
| Crystal size/mm <sup>3</sup>         | 0.27 × 0.11 × 0.08                                                            |
| Radiation                            | MoKα (λ = 0.71073)                                                            |
| 2θ range for data collection/°       | 5.482 to 64.062                                                               |
| Index ranges                         | -17 ≤ h ≤ 17, -23 ≤ k ≤ 24, -24 ≤ l ≤ 25                                      |
| Reflections collected                | 148871                                                                        |
| Independent reflections              | 11815 [R <sub>int</sub> = 0.0350, R <sub>sigma</sub> = 0.0170]                |
| Data/restraints/parameters           | 11815/0/403                                                                   |



Goodness-of-fit on  $F^2$  1.065  
 Final R indexes [ $I > 2\sigma(I)$ ]  $R_1 = 0.0268$ ,  $wR_2 = 0.0733$   
 Final R indexes [all data]  $R_1 = 0.0279$ ,  $wR_2 = 0.0742$   
 Largest diff. peak/hole /  $e \text{ \AA}^{-3}$  0.66/-0.28  
 Flack parameter 0.018(6)

Table 2 Fractional Atomic Coordinates ( $\times 10^4$ ) and Equivalent Isotropic Displacement Parameters ( $\text{\AA}^2 \times 10^3$ ) for mo\_D8V6585.  $U_{eq}$  is defined as 1/3 of the trace of the orthogonalised  $U_{ij}$  tensor.

| Atom | x          | y          | z           | U(eq)     |
|------|------------|------------|-------------|-----------|
| S001 | 6141.7(3)  | 6347.1(2)  | 7248.7(2)   | 16.01(6)  |
| S002 | 2259.6(2)  | 8948.4(2)  | 6810.0(2)   | 15.89(6)  |
| O003 | 3104.3(8)  | 9318.0(6)  | 5260.4(6)   | 18.47(17) |
| O004 | 5355.9(8)  | 7493.1(6)  | 4575.4(6)   | 19.94(17) |
| O005 | 7244.5(8)  | 8418.0(6)  | 7693.1(6)   | 19.30(17) |
| O006 | 6063.5(8)  | 8110.8(6)  | 5694.5(5)   | 16.31(16) |
| O007 | 7247.2(10) | 8140.0(7)  | 3932.7(6)   | 25.6(2)   |
| O008 | 1289.0(8)  | 8718.8(6)  | 6307.5(6)   | 19.80(17) |
| O009 | 7136.0(9)  | 5868.5(6)  | 7300.0(6)   | 22.42(19) |
| O00A | 5336.9(9)  | 6169.3(6)  | 6653.5(6)   | 21.21(18) |
| O00B | 7381.0(9)  | 9045.2(7)  | 4900.2(6)   | 26.6(2)   |
| O10  | 851.5(12)  | 5984.6(9)  | 9152.2(10)  | 45.5(3)   |
| N00D | 3325.7(9)  | 8313.1(7)  | 6660.5(6)   | 15.43(18) |
| N00E | 6517.9(9)  | 7284.4(6)  | 7129.1(6)   | 15.25(18) |
| C00F | 3883.6(10) | 8672.1(7)  | 5288.1(7)   | 15.59(19) |
| C00G | 6890.3(11) | 8450.6(8)  | 4518.3(7)   | 17.2(2)   |
| C00H | 3605.1(14) | 6078.2(11) | 10293.1(9)  | 30.7(3)   |
| C00I | 2829.9(12) | 8735.8(10) | 8346.2(8)   | 25.0(3)   |
| C00J | 4912.7(11) | 8870.2(8)  | 4801.1(7)   | 17.6(2)   |
| C00K | 8359.5(11) | 7749.9(9)  | 6695.3(8)   | 23.2(3)   |
| C00L | 4244.9(12) | 6139.8(8)  | 9541.6(8)   | 22.3(2)   |
| C00M | 7597.6(10) | 7656.9(8)  | 7396.5(7)   | 17.5(2)   |
| C00N | 5369.8(12) | 5937.7(8)  | 9504.1(8)   | 21.8(2)   |
| C00O | 1854.5(11) | 8592.3(9)  | 7792.9(7)   | 20.1(2)   |
| C00P | 871.2(13)  | 9135.9(11) | 8012.9(9)   | 30.0(3)   |
| C00Q | 1507.3(12) | 7705.0(9)  | 7767.3(9)   | 24.7(3)   |
| C00R | 4227.0(10) | 8578.4(7)  | 6141.7(7)   | 14.10(19) |
| C00S | 5780.5(10) | 8202.0(8)  | 4894.0(7)   | 15.8(2)   |
| C00T | 6316.7(10) | 8698.0(7)  | 7245.2(7)   | 16.46(19) |
| C00U | 5418.6(10) | 6266.9(7)  | 8141.4(7)   | 17.3(2)   |
| C00V | 4287.0(11) | 6457.6(8)  | 8162.6(8)   | 20.7(2)   |
| C00W | 5161.6(10) | 7942.5(7)  | 6210.1(7)   | 13.87(19) |
| C00X | 5961.5(11) | 5996.2(8)  | 8809.6(8)   | 20.2(2)   |
| C00Y | 5701.9(12) | 9306.3(8)  | 7746.0(9)   | 23.1(2)   |
| C00Z | 3711.5(12) | 6397.9(9)  | 8861.5(8)   | 23.3(2)   |
| C010 | 8176.8(12) | 7239.2(9)  | 8071.8(9)   | 25.0(3)   |
| C011 | 5662.8(10) | 7921.9(7)  | 7033.8(7)   | 14.07(19) |
| C012 | 2324.8(12) | 9243.5(9)  | 4639.5(8)   | 24.1(3)   |
| C013 | 8470.0(14) | 9283.5(11) | 4612.5(11)  | 33.8(3)   |
| C014 | 508.2(19)  | 5415.5(14) | 8589.4(19)  | 54.5(6)   |
| C015 | -37(2)     | 6223.1(16) | 9675.5(16)  | 56.3(7)   |
| C016 | 1476(2)    | 5232.5(18) | 8083(3)     | 88.0(14)  |
| C017 | 386(3)     | 6877.7(17) | 10193.3(19) | 77.5(11)  |

Table 3 Anisotropic Displacement Parameters ( $\text{\AA}^2 \times 10^3$ ) for mo\_D8V6585. The Anisotropic displacement factor exponent takes the form:  $-2\pi^2[h^2a^{*2}U_{11}+2hka^*b^*U_{12}+\dots]$ .

| Atom | $U_{11}$  | $U_{22}$  | $U_{33}$  | $U_{23}$  | $U_{13}$  | $U_{12}$ |
|------|-----------|-----------|-----------|-----------|-----------|----------|
| S001 | 20.03(13) | 13.16(11) | 14.84(11) | 0.30(9)   | -0.90(10) | 1.30(10) |
| S002 | 14.21(11) | 17.02(12) | 16.44(12) | -3.15(10) | -1.14(9)  | 1.86(10) |
| O003 | 18.1(4)   | 19.4(4)   | 17.9(4)   | -1.0(3)   | -3.2(3)   | 5.9(3)   |
| O004 | 17.6(4)   | 19.5(4)   | 22.7(4)   | -7.0(3)   | 1.1(3)    | 0.2(3)   |
| O005 | 17.6(4)   | 19.7(4)   | 20.6(4)   | -4.6(3)   | -4.5(3)   | 0.5(3)   |
| O006 | 13.8(4)   | 21.4(4)   | 13.7(3)   | 1.3(3)    | 0.8(3)    | 0.6(3)   |
| O007 | 29.3(5)   | 23.4(5)   | 24.1(5)   | -5.3(4)   | 10.0(4)   | -1.3(4)  |

|      |          |          |          |          |          |          |
|------|----------|----------|----------|----------|----------|----------|
| O008 | 15.2(4)  | 23.0(4)  | 21.3(4)  | -4.6(3)  | -4.7(3)  | 3.0(3)   |
| O009 | 26.7(5)  | 19.8(4)  | 20.7(4)  | 1.4(3)   | 1.8(4)   | 8.8(4)   |
| O00A | 28.8(5)  | 16.9(4)  | 17.9(4)  | -0.3(3)  | -4.9(3)  | -4.0(3)  |
| O00B | 23.7(5)  | 30.4(5)  | 25.8(5)  | -8.5(4)  | 8.3(4)   | -9.8(4)  |
| O10  | 36.0(7)  | 34.4(7)  | 66.1(10) | 6.2(7)   | 9.5(7)   | -3.2(6)  |
| N00D | 13.2(4)  | 16.0(4)  | 17.1(4)  | -0.6(3)  | 1.3(3)   | 1.2(3)   |
| N00E | 13.8(4)  | 13.7(4)  | 18.3(4)  | 1.4(3)   | -2.0(3)  | 0.8(3)   |
| C00F | 15.6(5)  | 15.7(5)  | 15.5(4)  | -0.8(4)  | -1.7(4)  | 2.8(4)   |
| C00G | 18.2(5)  | 16.3(5)  | 17.1(5)  | 0.8(4)   | 1.7(4)   | 1.2(4)   |
| C00H | 32.3(7)  | 37.2(8)  | 22.7(6)  | -0.8(6)  | 7.2(5)   | -0.4(6)  |
| C00I | 21.3(5)  | 36.3(7)  | 17.3(5)  | -3.9(5)  | -2.2(4)  | 1.4(5)   |
| C00J | 18.9(5)  | 18.5(5)  | 15.5(5)  | 0.8(4)   | 0.8(4)   | 2.7(4)   |
| C00K | 15.3(5)  | 30.7(7)  | 23.6(6)  | -2.6(5)  | 1.8(4)   | -1.9(5)  |
| C00L | 26.0(6)  | 20.1(6)  | 20.7(5)  | -0.7(4)  | 2.8(5)   | -1.7(5)  |
| C00M | 13.7(5)  | 19.1(5)  | 19.5(5)  | -2.2(4)  | -2.4(4)  | 0.1(4)   |
| C00N | 26.3(6)  | 21.1(6)  | 17.9(5)  | 1.1(4)   | 0.3(5)   | 0.3(5)   |
| C00O | 15.8(5)  | 27.5(6)  | 17.1(5)  | -2.3(5)  | 1.9(4)   | 2.3(4)   |
| C00P | 22.6(6)  | 42.1(9)  | 25.3(6)  | -6.0(6)  | 4.4(5)   | 9.6(6)   |
| C00Q | 19.8(6)  | 29.1(6)  | 25.2(6)  | 2.6(5)   | 2.8(5)   | -1.9(5)  |
| C00R | 13.7(4)  | 15.2(5)  | 13.4(4)  | -0.2(4)  | -0.2(4)  | 1.3(4)   |
| C00S | 16.0(5)  | 17.1(5)  | 14.4(5)  | -0.9(4)  | 1.0(4)   | 0.7(4)   |
| C00T | 16.6(5)  | 14.8(4)  | 18.0(5)  | -1.1(4)  | -1.8(4)  | -0.6(4)  |
| C00U | 19.8(5)  | 14.5(5)  | 17.5(5)  | 0.8(4)   | 0.1(4)   | -0.8(4)  |
| C00V | 19.7(5)  | 21.2(6)  | 21.2(5)  | 2.3(4)   | -1.1(4)  | -0.9(4)  |
| C00W | 13.0(4)  | 14.8(5)  | 13.9(4)  | 0.1(4)   | 0.2(4)   | 0.4(4)   |
| C00X | 23.0(6)  | 19.3(5)  | 18.2(5)  | 1.8(4)   | -0.4(4)  | 1.1(4)   |
| C00Y | 25.0(6)  | 19.3(5)  | 25.0(6)  | -7.1(5)  | -4.0(5)  | 3.1(5)   |
| C00Z | 21.3(6)  | 23.9(6)  | 24.8(6)  | 0.7(5)   | 1.7(5)   | -0.4(5)  |
| C010 | 21.5(6)  | 28.5(7)  | 24.9(6)  | 0.1(5)   | -8.1(5)  | 3.5(5)   |
| C011 | 13.5(4)  | 13.9(5)  | 14.8(4)  | 0.0(4)   | -0.9(4)  | 0.1(4)   |
| C012 | 22.7(6)  | 30.0(7)  | 19.7(5)  | 1.9(5)   | -6.5(5)  | 6.3(5)   |
| C013 | 26.6(7)  | 35.1(8)  | 39.7(9)  | -6.0(7)  | 13.0(6)  | -12.0(6) |
| C014 | 32.5(9)  | 37.0(10) | 94.2(19) | -0.7(11) | -8.7(11) | 1.0(8)   |
| C015 | 44.0(11) | 60.2(15) | 64.8(14) | 28.8(12) | 14.8(11) | 20.5(10) |
| C016 | 34.5(10) | 55.5(14) | 174(4)   | -74(2)   | -0.4(16) | -2.0(10) |
| C017 | 110(3)   | 47.4(14) | 75.3(18) | 12.5(13) | 55.7(19) | 21.6(15) |

Table 4 Bond Lengths for mo\_D8V6585.

| Atom | Atom | Length/Å   | Atom | Atom | Length/Å   |
|------|------|------------|------|------|------------|
| S001 | O009 | 1.4346(10) | C00F | C00J | 1.5273(17) |
| S001 | O00A | 1.4361(10) | C00F | C00R | 1.5282(16) |
| S001 | N00E | 1.6234(11) | C00G | C00S | 1.5366(17) |
| S001 | C00U | 1.7648(13) | C00H | C00L | 1.504(2)   |
| S002 | O008 | 1.4986(10) | C00I | C00O | 1.5263(19) |
| S002 | N00D | 1.6744(11) | C00J | C00S | 1.5253(17) |
| S002 | C00O | 1.8496(13) | C00K | C00M | 1.5188(19) |
| O003 | C00F | 1.4190(14) | C00L | C00N | 1.393(2)   |
| O003 | C012 | 1.4232(16) | C00L | C00Z | 1.397(2)   |
| O004 | C00S | 1.3874(15) | C00M | C010 | 1.5162(19) |
| O005 | C00M | 1.4192(15) | C00N | C00X | 1.3900(18) |
| O005 | C00T | 1.4302(15) | C00O | C00P | 1.530(2)   |
| O006 | C00S | 1.4218(14) | C00O | C00Q | 1.522(2)   |
| O006 | C00W | 1.4256(14) | C00R | C00W | 1.5409(16) |
| O007 | C00G | 1.2059(16) | C00T | C00Y | 1.5130(18) |
| O00B | C00G | 1.3182(16) | C00T | C011 | 1.5450(17) |
| O00B | C013 | 1.4526(18) | C00U | C00V | 1.3960(18) |
| O10  | C014 | 1.408(3)   | C00U | C00X | 1.3918(17) |
| O10  | C015 | 1.449(3)   | C00V | C00Z | 1.3868(19) |
| N00D | C00R | 1.4681(15) | C00W | C011 | 1.5355(16) |
| N00E | C00M | 1.5067(16) | C014 | C016 | 1.481(4)   |
| N00E | C011 | 1.4790(15) | C015 | C017 | 1.487(5)   |

Table 5 Bond Angles for mo\_D8V6585.

| Atom | Atom | Atom | Angle/° | Atom | Atom | Atom | Angle/° |
|------|------|------|---------|------|------|------|---------|
|------|------|------|---------|------|------|------|---------|

|      |      |      |            |      |      |      |            |
|------|------|------|------------|------|------|------|------------|
| O009 | S001 | O00A | 119.47(6)  | C00X | C00N | C00L | 121.27(13) |
| O009 | S001 | N00E | 107.44(6)  | C00I | C00O | S002 | 108.35(9)  |
| O009 | S001 | C00U | 108.39(6)  | C00I | C00O | C00P | 110.41(12) |
| O00A | S001 | N00E | 106.99(6)  | C00P | C00O | S002 | 103.99(10) |
| O00A | S001 | C00U | 105.63(6)  | C00Q | C00O | S002 | 110.56(9)  |
| N00E | S001 | C00U | 108.54(6)  | C00Q | C00O | C00I | 112.17(12) |
| O008 | S002 | N00D | 110.44(6)  | C00Q | C00O | C00P | 111.02(12) |
| O008 | S002 | C00O | 103.81(6)  | N00D | C00R | C00F | 114.28(10) |
| N00D | S002 | C00O | 98.17(6)   | N00D | C00R | C00W | 106.78(9)  |
| C00F | O003 | C012 | 113.23(10) | C00F | C00R | C00W | 109.78(9)  |
| C00M | O005 | C00T | 109.03(9)  | O004 | C00S | O006 | 112.26(10) |
| C00S | O006 | C00W | 115.93(9)  | O004 | C00S | C00G | 112.26(10) |
| C00G | O00B | C013 | 115.81(12) | O004 | C00S | C00J | 108.43(10) |
| C014 | O10  | C015 | 112.90(19) | O006 | C00S | C00G | 103.02(10) |
| C00R | N00D | S002 | 118.07(8)  | O006 | C00S | C00J | 109.92(10) |
| C00M | N00E | S001 | 126.12(8)  | C00J | C00S | C00G | 110.90(10) |
| C011 | N00E | S001 | 119.81(8)  | O005 | C00T | C00Y | 106.85(10) |
| C011 | N00E | C00M | 110.00(9)  | O005 | C00T | C011 | 104.77(9)  |
| O003 | C00F | C00J | 110.82(10) | C00Y | C00T | C011 | 115.73(11) |
| O003 | C00F | C00R | 106.62(9)  | C00V | C00U | S001 | 119.03(10) |
| C00J | C00F | C00R | 109.06(9)  | C00X | C00U | S001 | 120.48(10) |
| O007 | C00G | O00B | 124.79(13) | C00X | C00U | C00V | 120.47(12) |
| O007 | C00G | C00S | 122.97(12) | C00Z | C00V | C00U | 119.48(13) |
| O00B | C00G | C00S | 112.23(11) | O006 | C00W | C00R | 111.98(9)  |
| C00S | C00J | C00F | 109.99(10) | O006 | C00W | C011 | 106.05(9)  |
| C00N | C00L | C00H | 121.29(14) | C011 | C00W | C00R | 111.77(9)  |
| C00N | C00L | C00Z | 118.64(13) | C00N | C00X | C00U | 119.18(13) |
| C00Z | C00L | C00H | 120.07(13) | C00V | C00Z | C00L | 120.93(13) |
| O005 | C00M | N00E | 102.25(9)  | N00E | C011 | C00T | 102.10(9)  |
| O005 | C00M | C00K | 111.99(11) | N00E | C011 | C00W | 112.94(9)  |
| O005 | C00M | C010 | 105.39(10) | C00W | C011 | C00T | 113.38(10) |
| N00E | C00M | C00K | 108.61(10) | O10  | C014 | C016 | 107.89(18) |
| N00E | C00M | C010 | 116.25(11) | O10  | C015 | C017 | 108.3(2)   |
| C010 | C00M | C00K | 111.94(11) |      |      |      |            |

Table 6 Hydrogen Atom Coordinates ( $\text{\AA} \times 10^4$ ) and Isotropic Displacement Parameters ( $\text{\AA}^2 \times 10^3$ ) for mo\_D8V6585.

| Atom | x        | y        | z        | U(eq) |
|------|----------|----------|----------|-------|
| H004 | 5869     | 7237     | 4351     | 30    |
| H00D | 3081(17) | 7841(12) | 6537(11) | 19    |
| H00F | 3531     | 8160     | 5096     | 19    |
| H00A | 3906     | 5633     | 10608    | 46    |
| H00B | 2819     | 5973     | 10179    | 46    |
| H00C | 3673     | 6588     | 10583    | 46    |
| H00E | 3451     | 8381     | 8200     | 37    |
| H00G | 2599     | 8615     | 8882     | 37    |
| H00H | 3067     | 9303     | 8311     | 37    |
| H00I | 4701     | 8920     | 4245     | 21    |
| H00J | 5230     | 9395     | 4973     | 21    |
| H00K | 7968     | 8046     | 6282     | 35    |
| H00L | 8574     | 7212     | 6503     | 35    |
| H00M | 9028     | 8051     | 6848     | 35    |
| H00N | 5739     | 5756     | 9962     | 26    |
| H00O | 1099     | 9706     | 7982     | 45    |
| H00P | 632      | 9011     | 8546     | 45    |
| H00Q | 254      | 9039     | 7651     | 45    |
| H00R | 934      | 7630     | 7367     | 37    |
| H00S | 1209     | 7545     | 8277     | 37    |
| H00T | 2155     | 7368     | 7642     | 37    |
| H00U | 4516     | 9111     | 6333     | 17    |
| H00V | 6588     | 8968     | 6758     | 20    |
| H00W | 3914     | 6627     | 7702     | 25    |
| H00X | 4851     | 7396     | 6084     | 17    |

|      |      |      |       |     |
|------|------|------|-------|-----|
| H00Y | 6727 | 5853 | 8791  | 24  |
| H00Z | 5487 | 9051 | 8240  | 35  |
| H    | 5033 | 9491 | 7471  | 35  |
| HA   | 6187 | 9771 | 7852  | 35  |
| H00  | 2944 | 6534 | 8878  | 28  |
| H01A | 8816 | 7565 | 8239  | 37  |
| H01B | 8434 | 6702 | 7906  | 37  |
| H01C | 7655 | 7180 | 8507  | 37  |
| H01I | 5055 | 7836 | 7424  | 17  |
| H01D | 2717 | 9277 | 4139  | 36  |
| H01E | 1777 | 9683 | 4674  | 36  |
| H01F | 1943 | 8720 | 4678  | 36  |
| H01G | 8430 | 9377 | 4049  | 51  |
| H01H | 9008 | 8851 | 4721  | 51  |
| H01I | 8707 | 9783 | 4874  | 51  |
| H01J | -109 | 5641 | 8274  | 65  |
| H01K | 243  | 4914 | 8848  | 65  |
| H01L | -280 | 5753 | 9991  | 68  |
| H01M | -684 | 6421 | 9372  | 68  |
| H01N | 1282 | 4793 | 7723  | 132 |
| H01O | 2108 | 5066 | 8407  | 132 |
| H01P | 1677 | 5718 | 7785  | 132 |
| H01Q | 612  | 7344 | 9876  | 116 |
| H01R | 1027 | 6677 | 10489 | 116 |
| H01S | -203 | 7043 | 10556 | 116 |

## Experimental

Single crystals of  $C_{29}H_{50}N_2O_{10}S_2$  [mo\_D8V6585] were [From diethylether]. A suitable crystal was selected and [silicone grease on kapton loop] on a Bruker D8Venture Photon3 microsource APEX5 diffractometer. The crystal was kept at 100.0 K during data collection. Using Olex2 [1], the structure was solved with the XT [2] structure solution program using Intrinsic Phasing and refined with the ShelXL [3] refinement package using Least Squares minimisation.

1. Dolomanov, O.V., Bourhis, L.J., Gildea, R.J., Howard, J.A.K. & Puschmann, H. (2009), J. Appl. Cryst. 42, 339-341.
2. Sheldrick, G.M. (2015). Acta Cryst. A71, 3-8.
3. Sheldrick, G.M. (2015). Acta Cryst. C71, 3-8.

## Crystal structure determination of [mo\_D8V6585]

**Crystal Data** for  $C_{29}H_{50}N_2O_{10}S_2$  ( $M = 650.83$  g/mol): orthorhombic, space group  $P2_12_12_1$  (no. 19),  $a = 12.0149(4)$  Å,  $b = 16.4908(5)$  Å,  $c = 17.1438(5)$  Å,  $V = 3396.79(18)$  Å<sup>3</sup>,  $Z = 4$ ,  $T = 100.0$  K,  $\mu(\text{MoK}\alpha) = 0.211$  mm<sup>-1</sup>,  $D_{\text{calc}} = 1.273$  g/cm<sup>3</sup>, 148871 reflections measured ( $5.482^\circ \leq 2\theta \leq 64.062^\circ$ ), 11815 unique ( $R_{\text{int}} = 0.0350$ ,  $R_{\text{sigma}} = 0.0170$ ) which were used in all calculations. The final  $R_1$  was 0.0268 ( $I > 2\sigma(I)$ ) and  $wR_2$  was 0.0742 (all data).

## Refinement model description

Number of restraints - 0, number of constraints - unknown.

Details:

### 1. Fixed Uiso

At 1.2 times of:

All C(H) groups, All C(H,H) groups, All N(H) groups

At 1.5 times of:

All C(H,H,H) groups, All O(H) groups

### 2.a Ternary CH refined with riding coordinates:

C00F(H00F), C00R(H00U), C00T(H00V), C00W(H00X), C011(H011)

### 2.b Secondary CH2 refined with riding coordinates:

C00J(H00I,H00J), C014(H01J,H01K), C015(H01L,H01M)

### 2.c Aromatic/amide H refined with riding coordinates:

C00N(H00N), C00V(H00W), C00X(H00Y), C00Z(H00)

### 2.d Idealised Me refined as rotating group:

C00H(H00A,H00B,H00C), C00I(H00E,H00G,H00H), C00K(H00K,H00L,H00M), C00P(H00O,H00P,H00Q), C00Q(H00R,H00S,H00T), C00Y(H00Z,H,HA), C010(H01A,H01B,H01C), C012(H01D,H01E,H01F), C013(H01G,H01H,H01I), C016(H01N,H01O,H01P), C017(H01Q,H01R,H01S)

2.e Idealised tetrahedral OH refined as rotating group:  
O004(H004)

This report has been created with Olex2, compiled on 2018.05.29 svn.r3508 for OlexSys. Please let us know if there are any errors or if you would like to have additional features.

## NMR Spectra

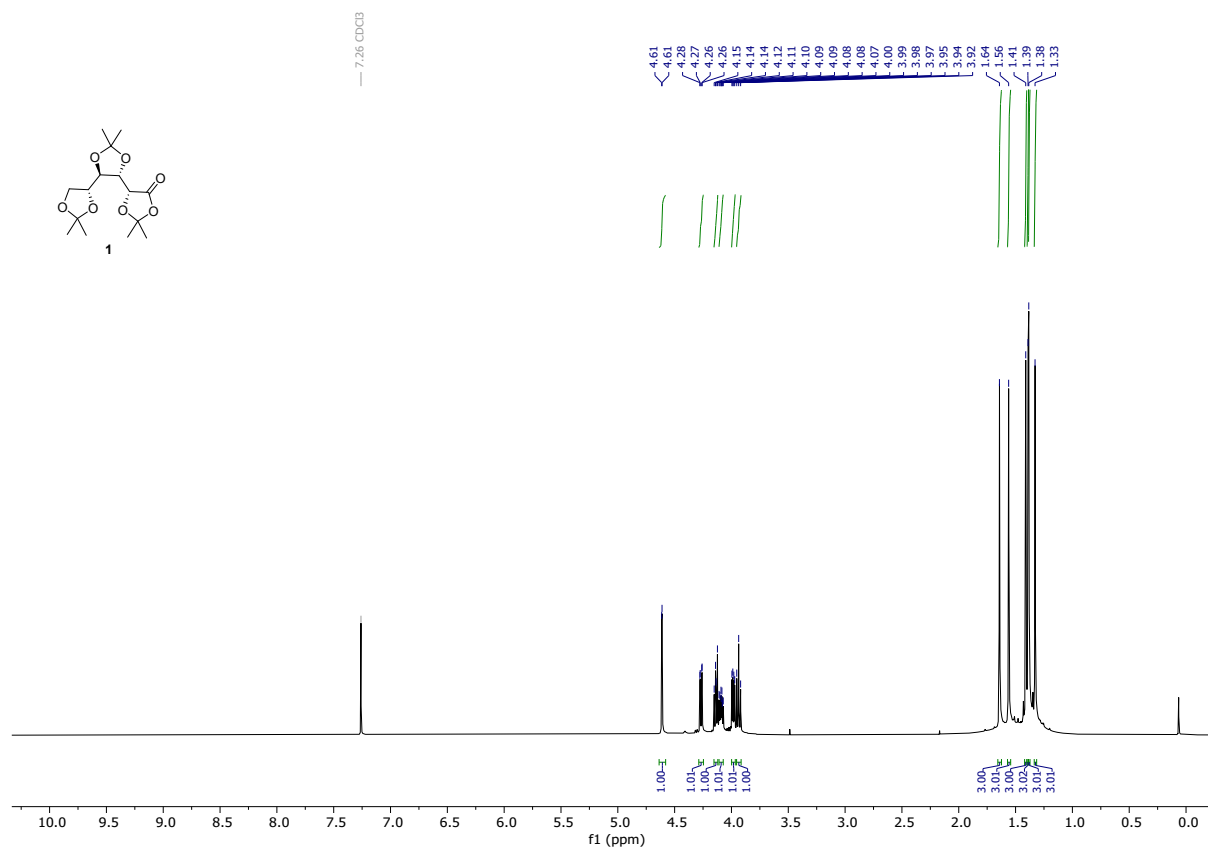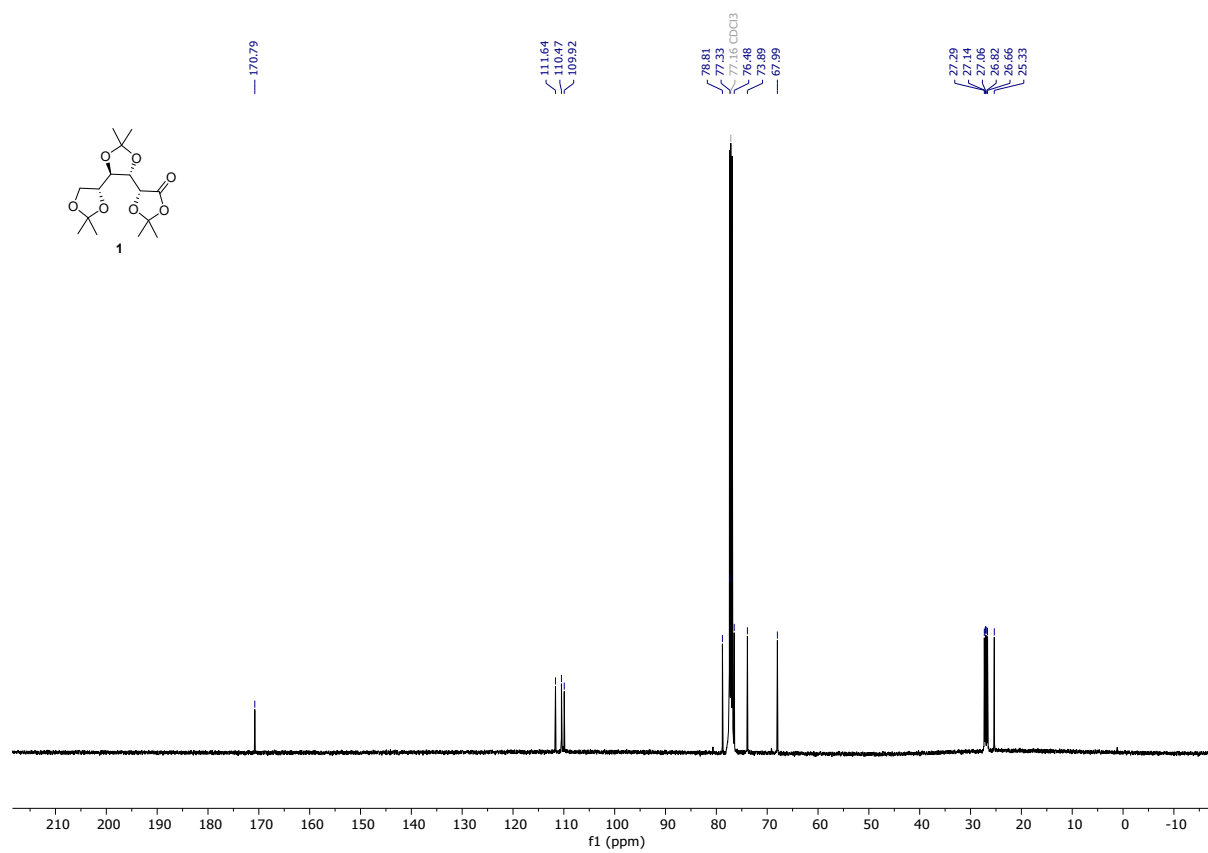



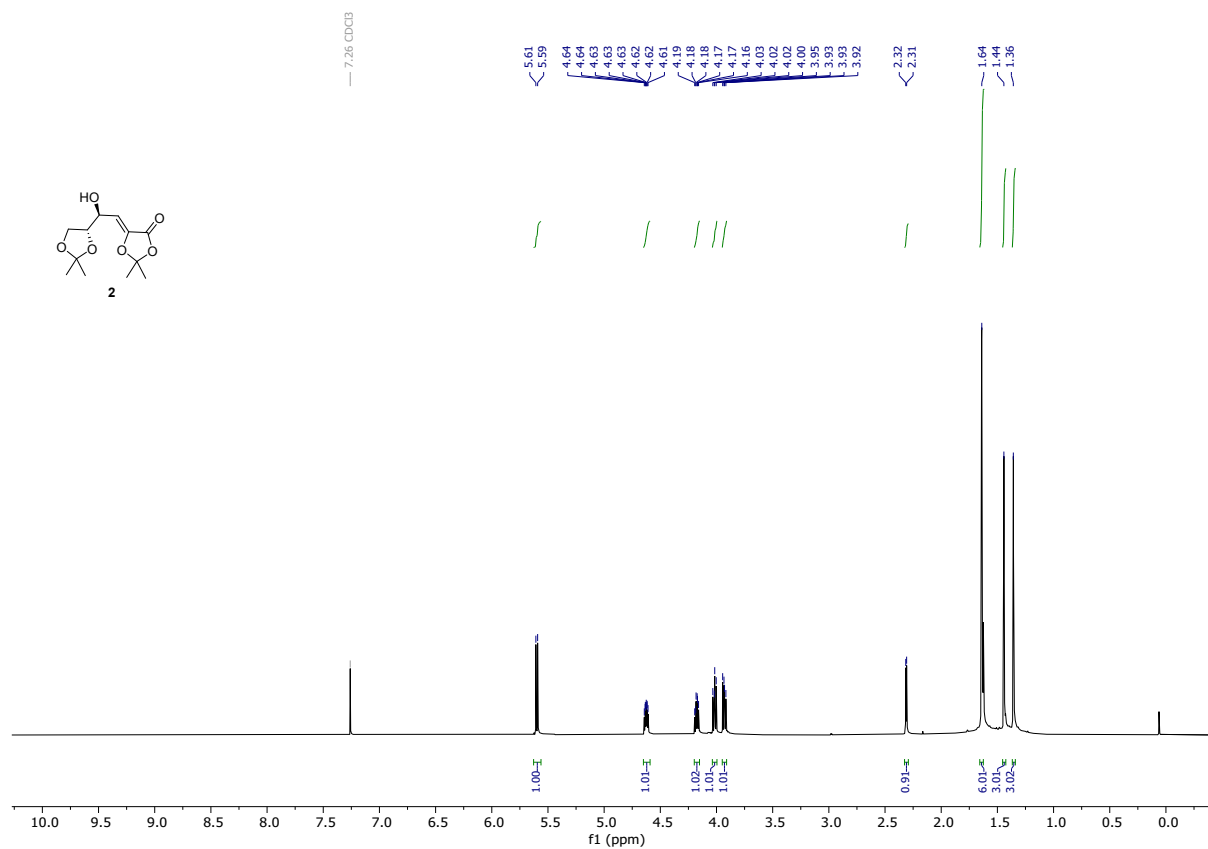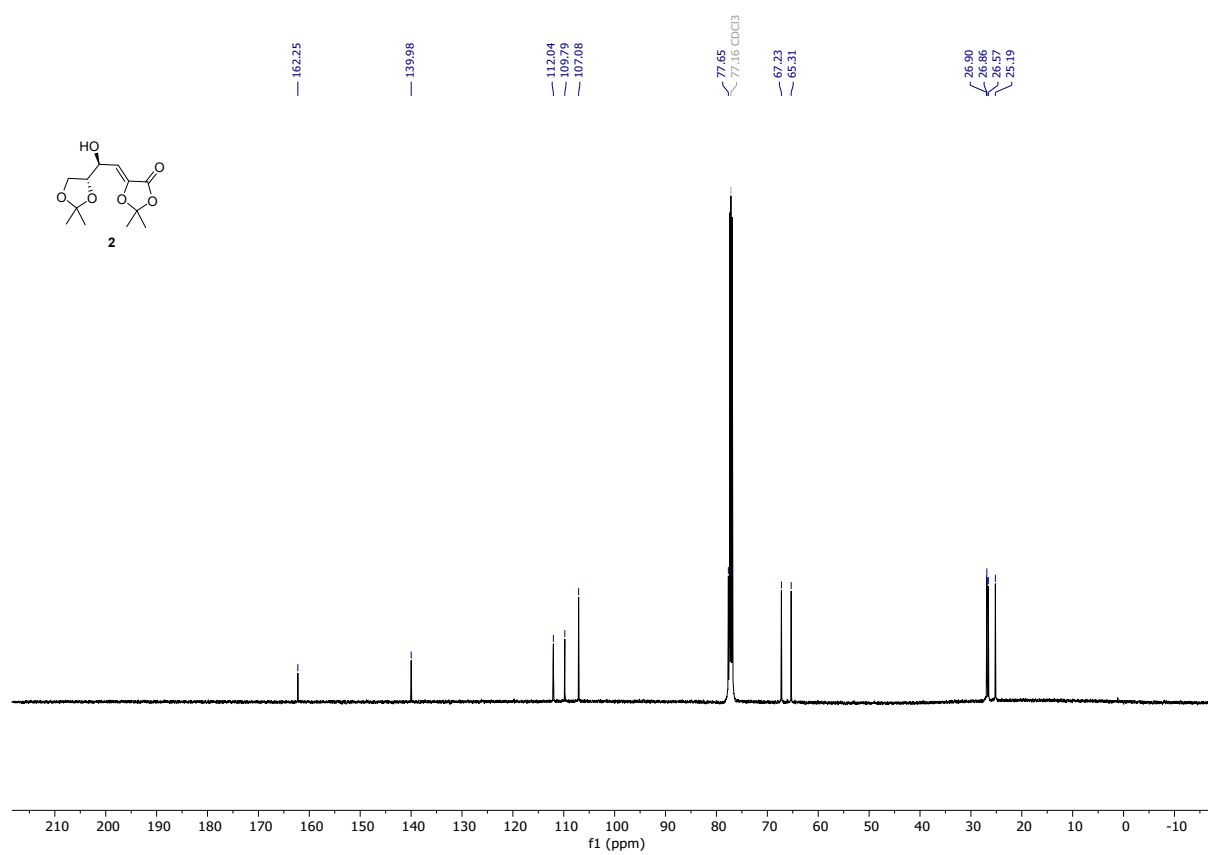

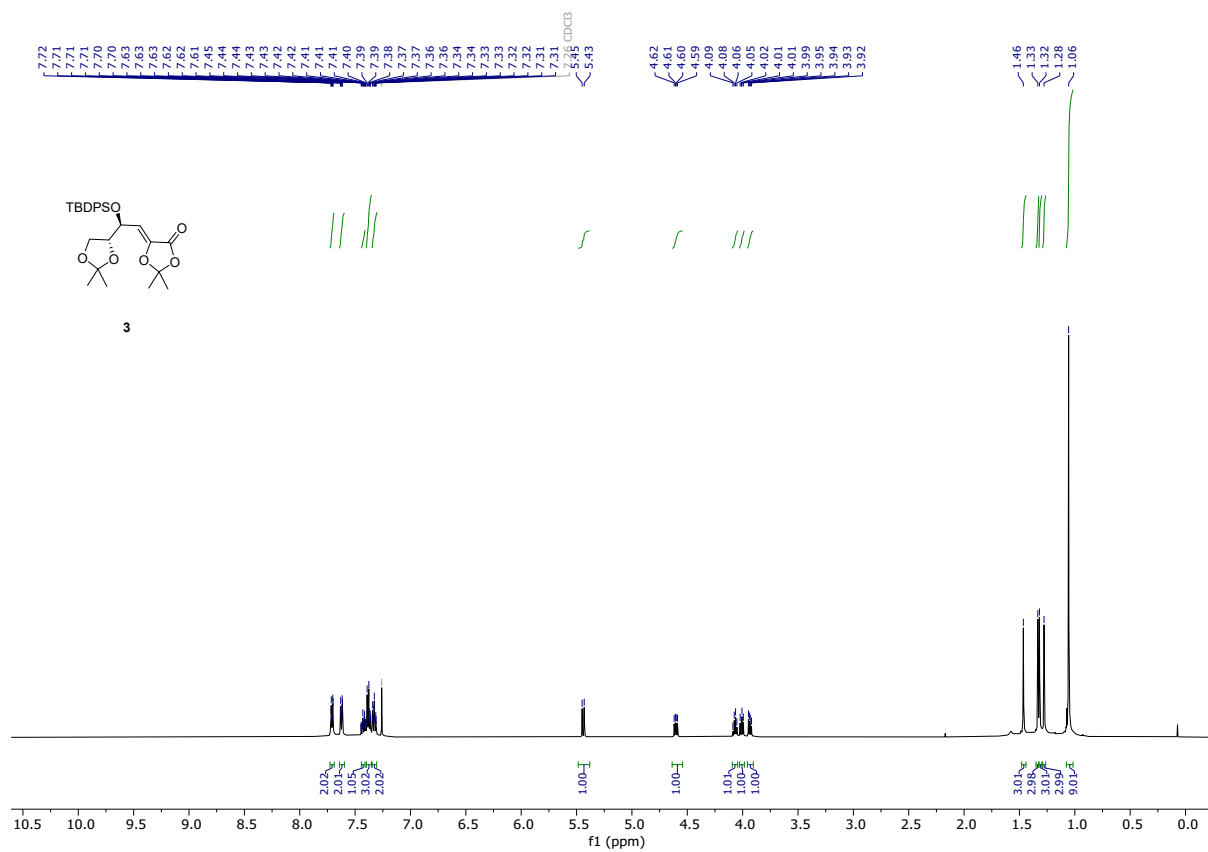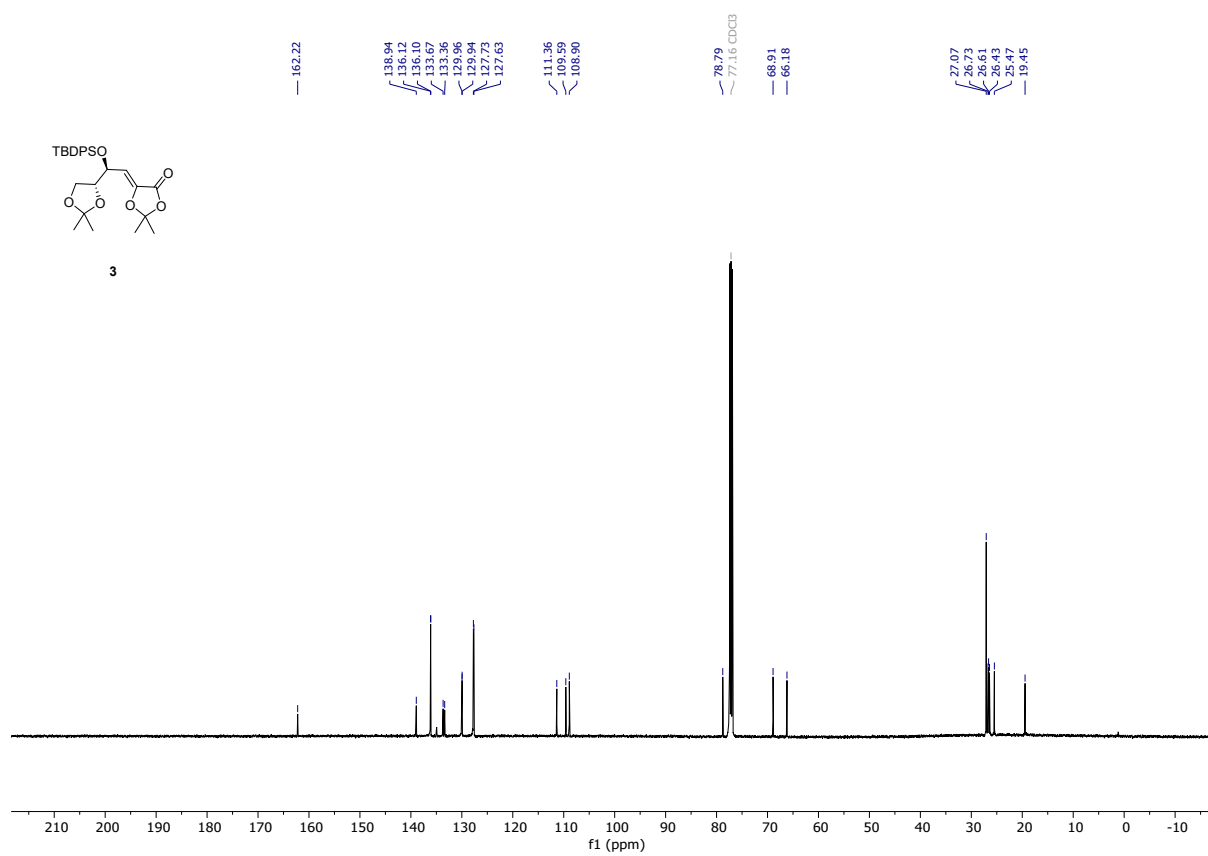

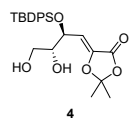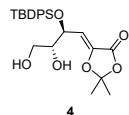

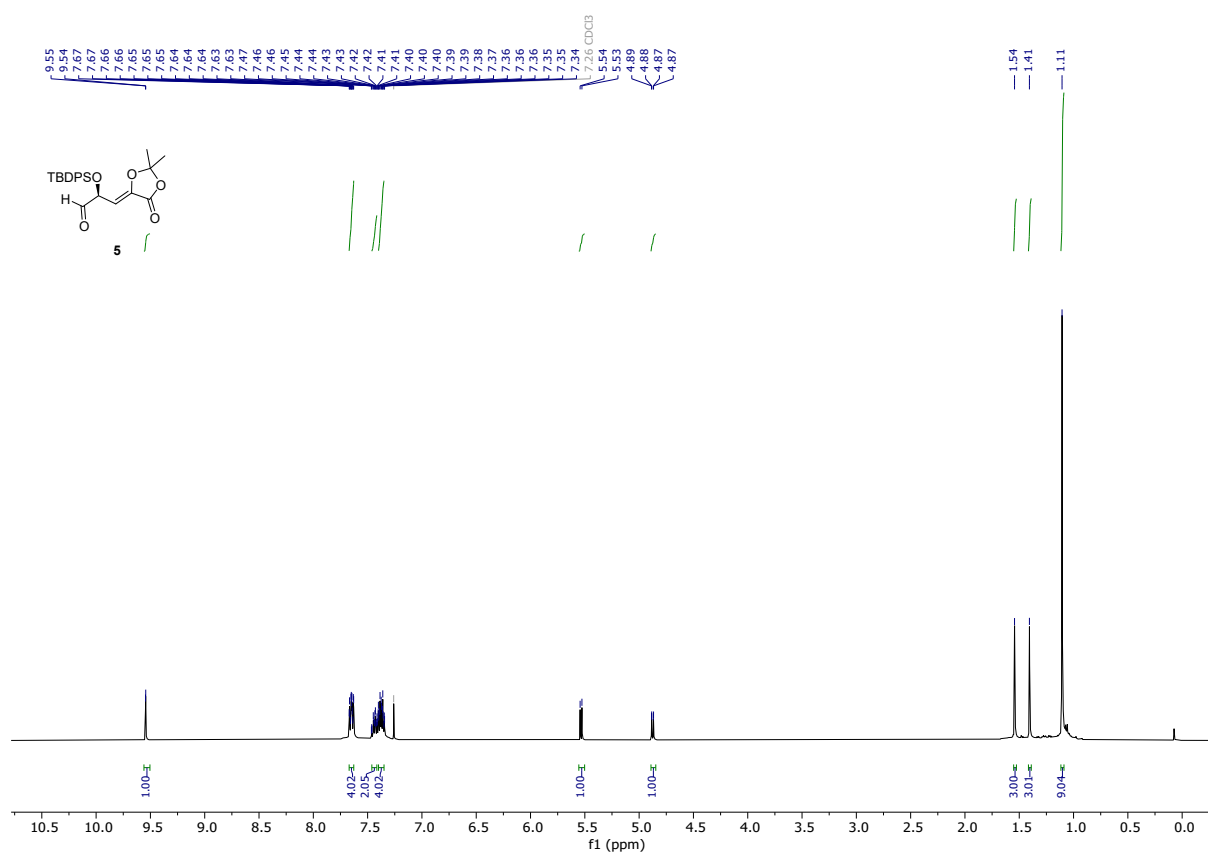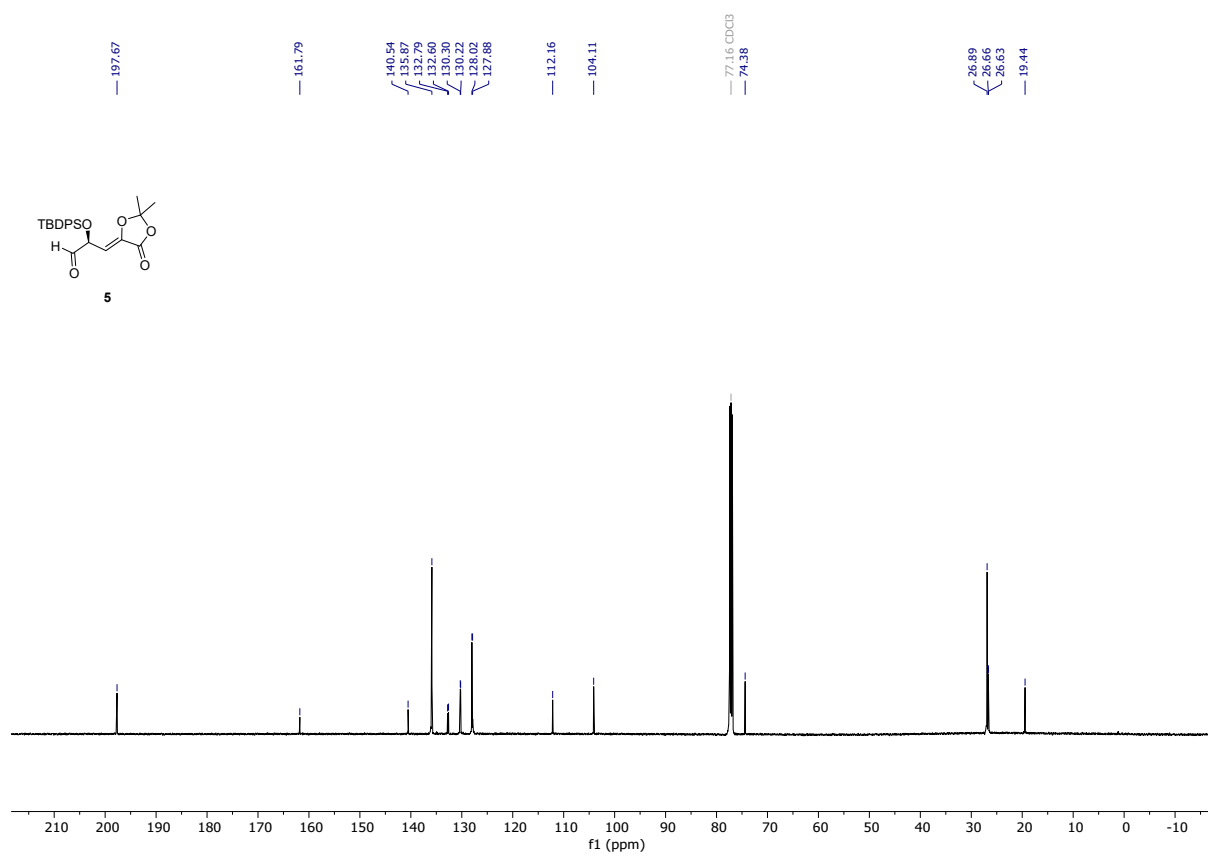

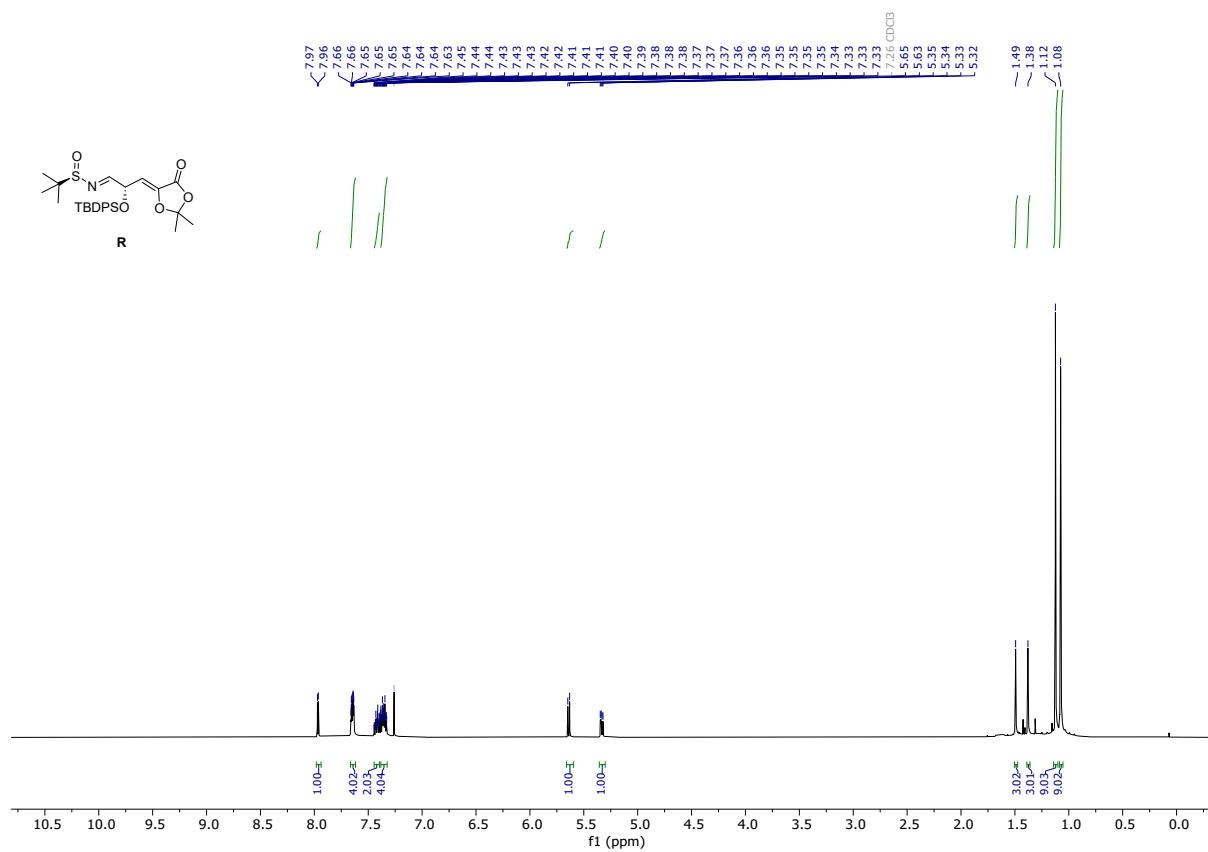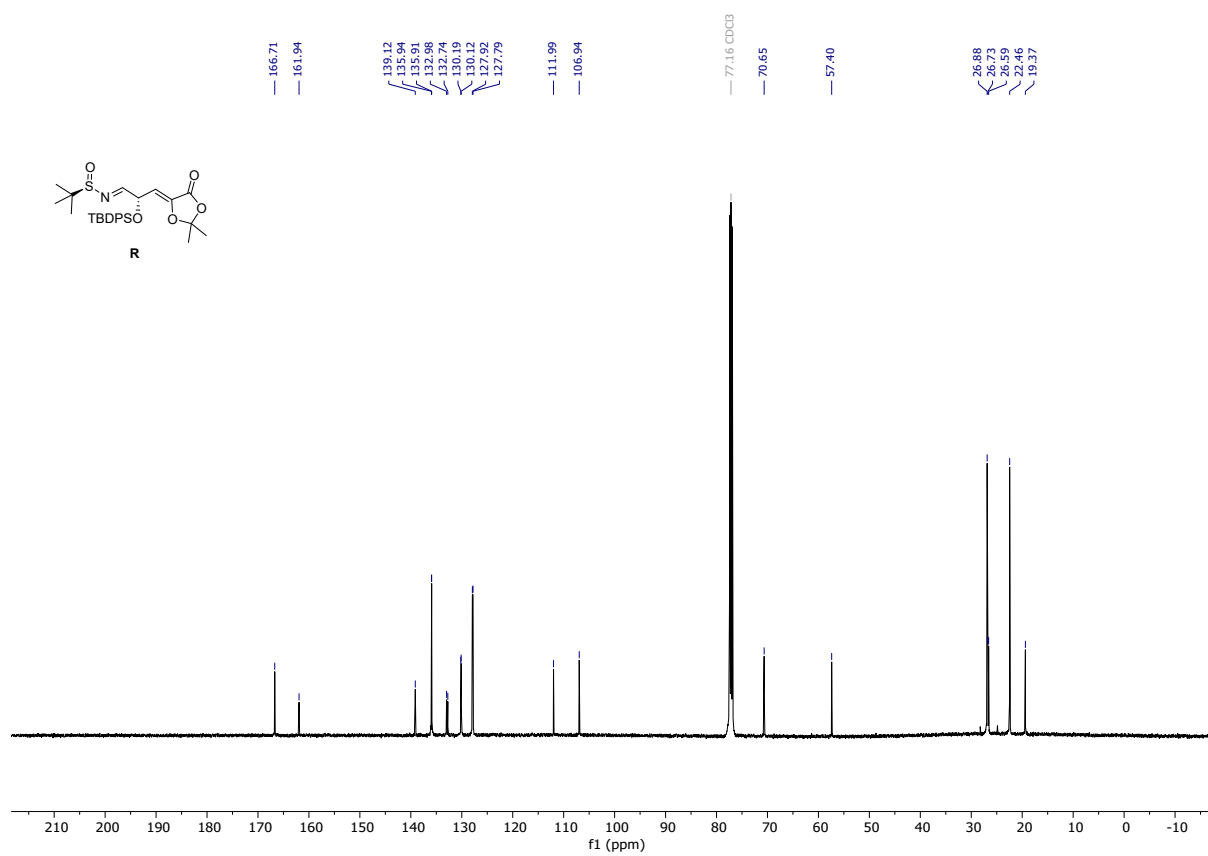

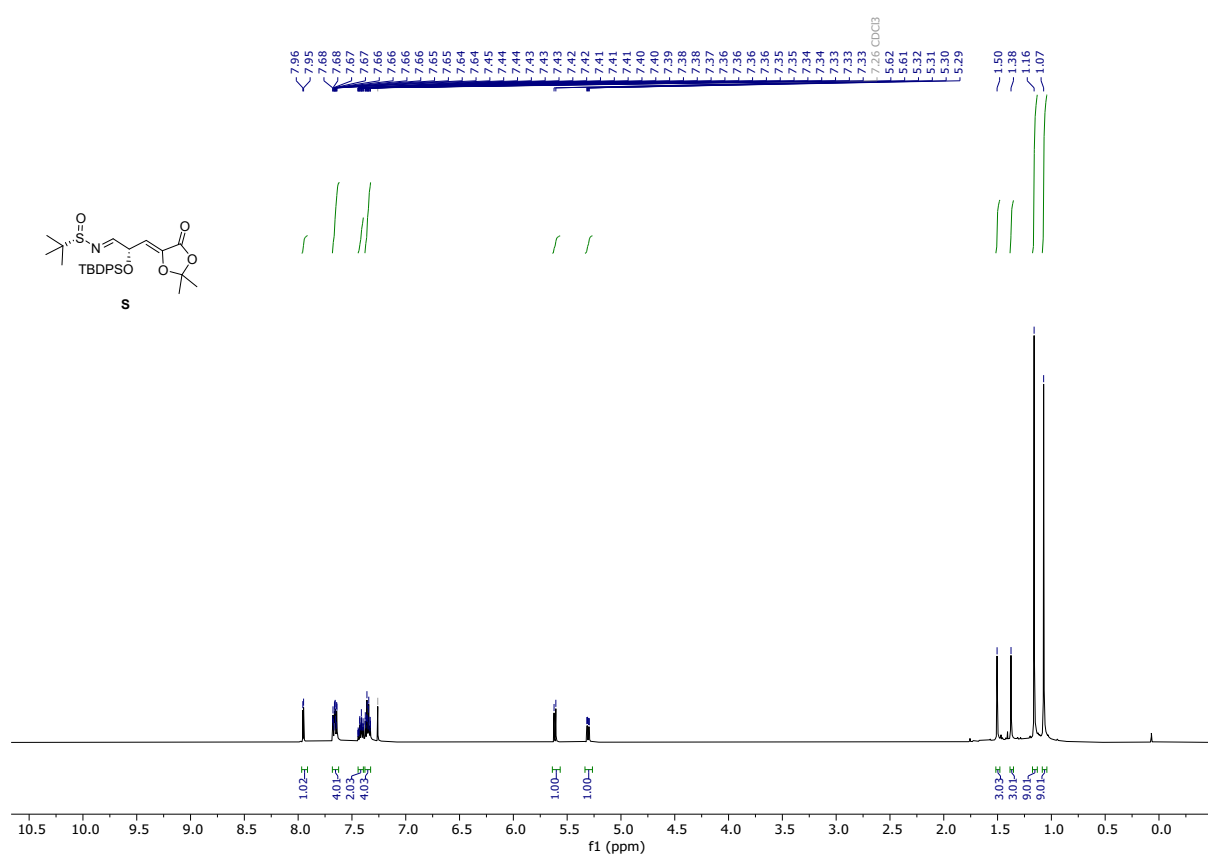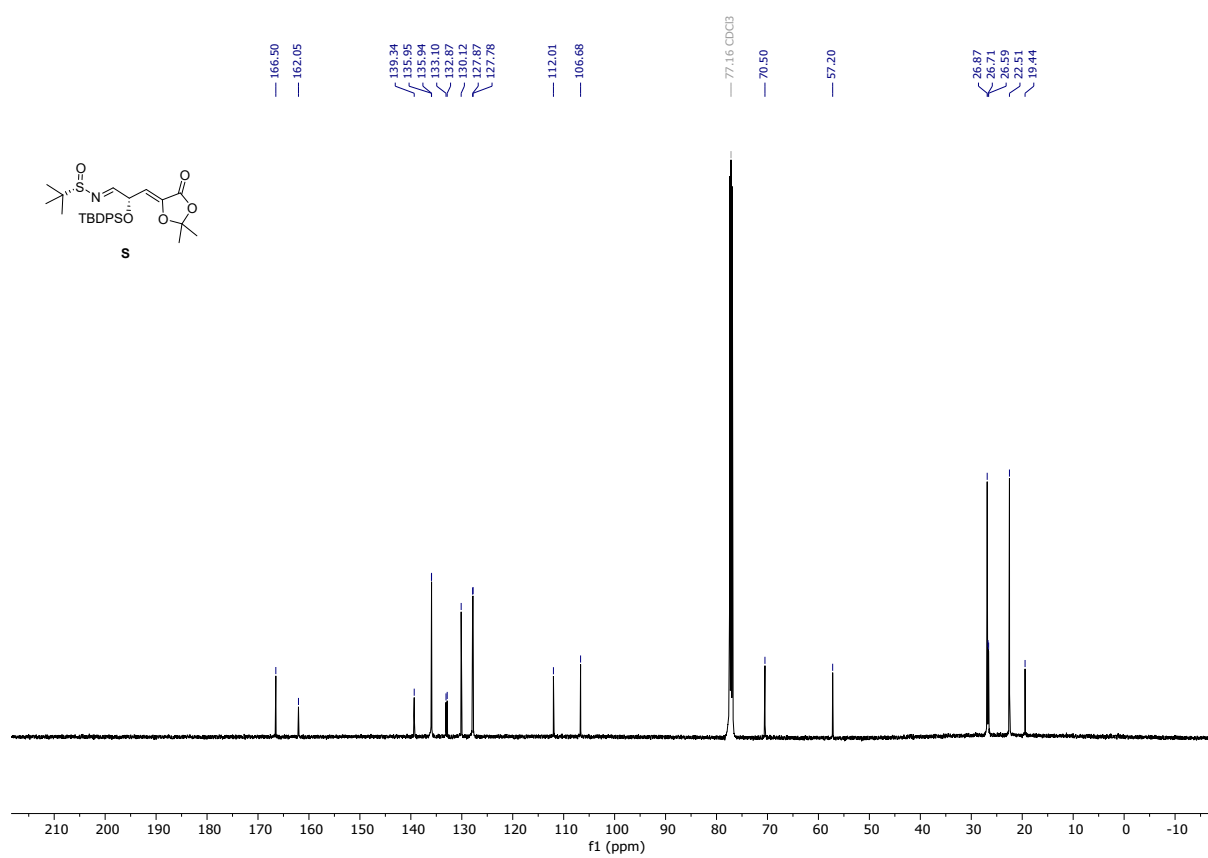

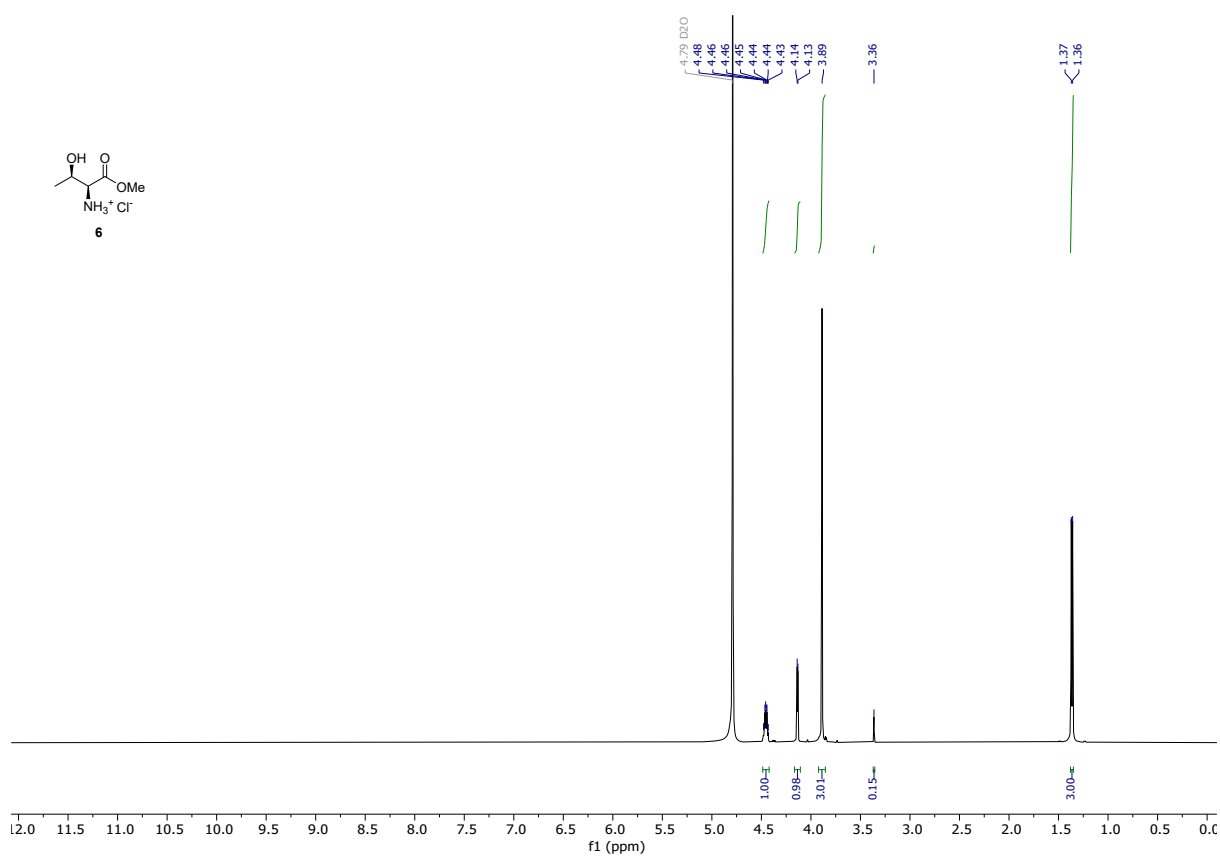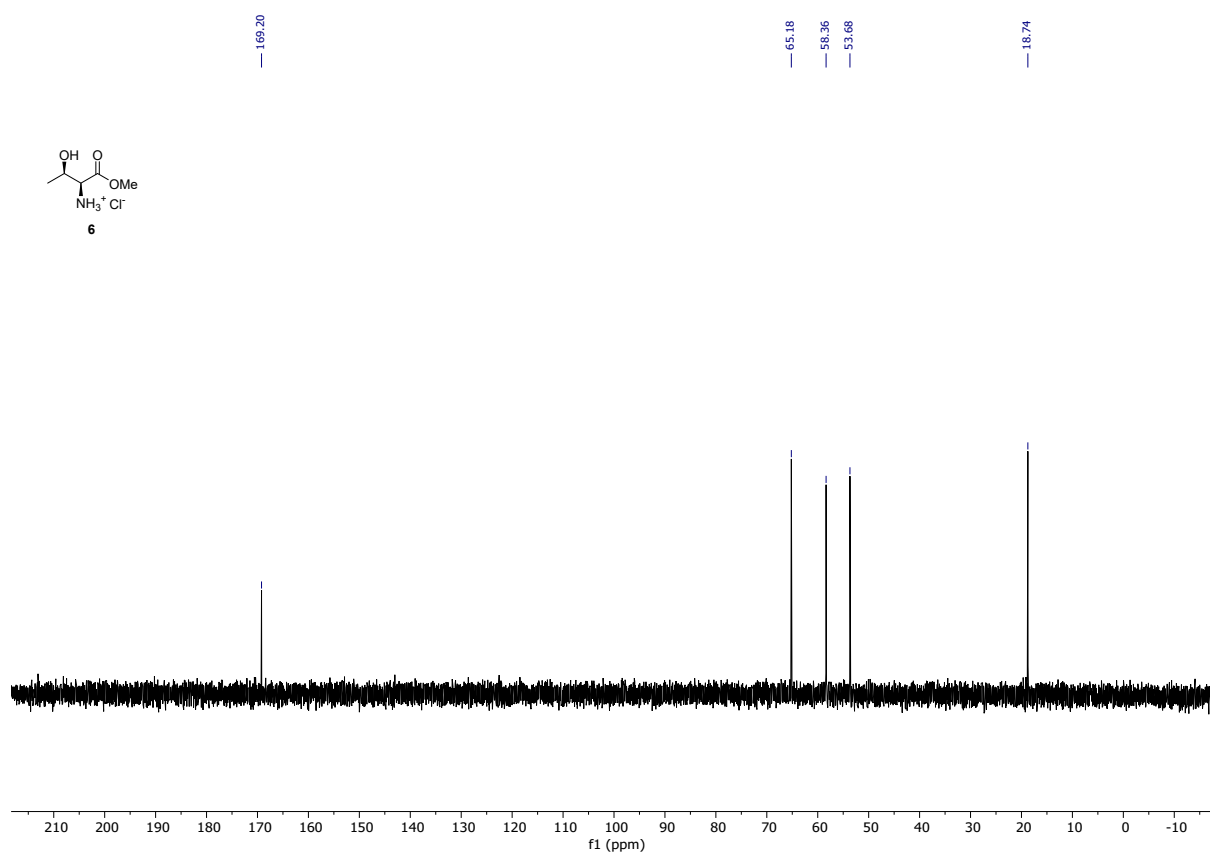



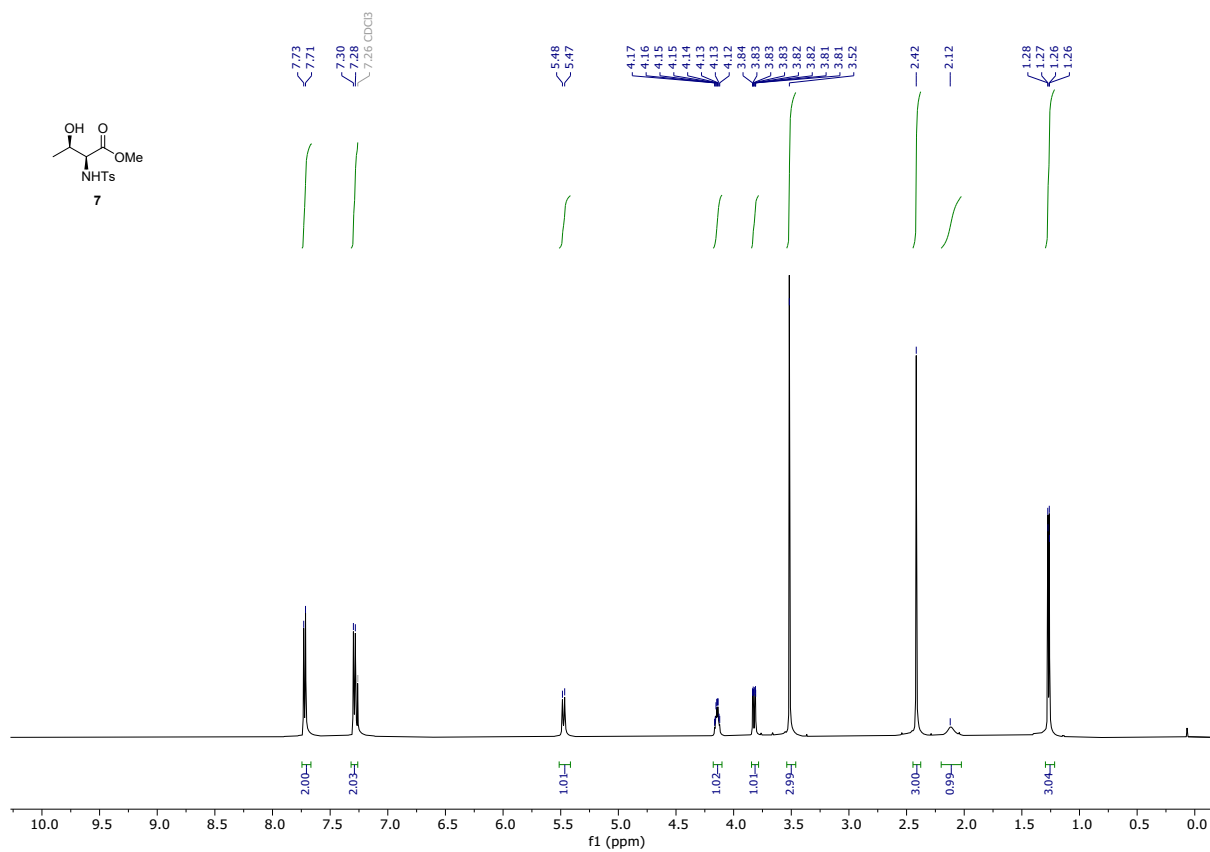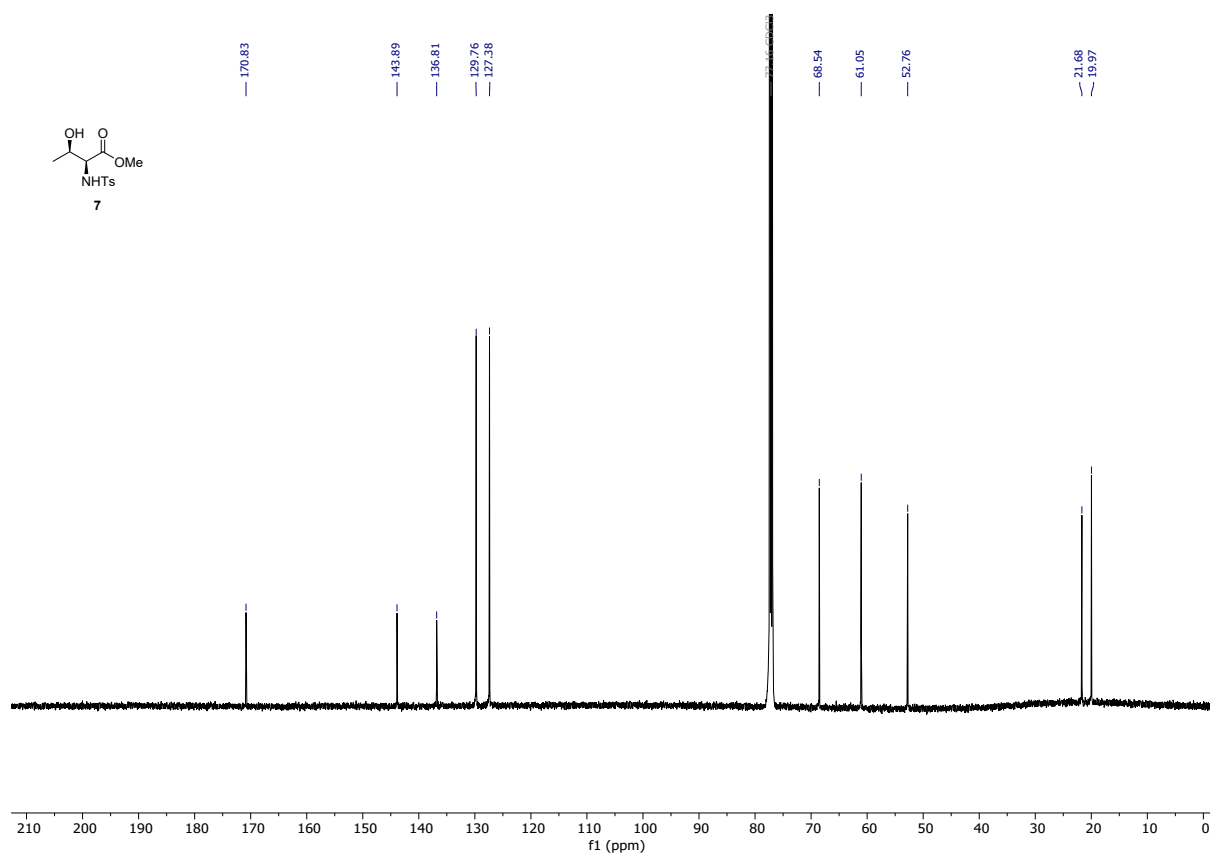

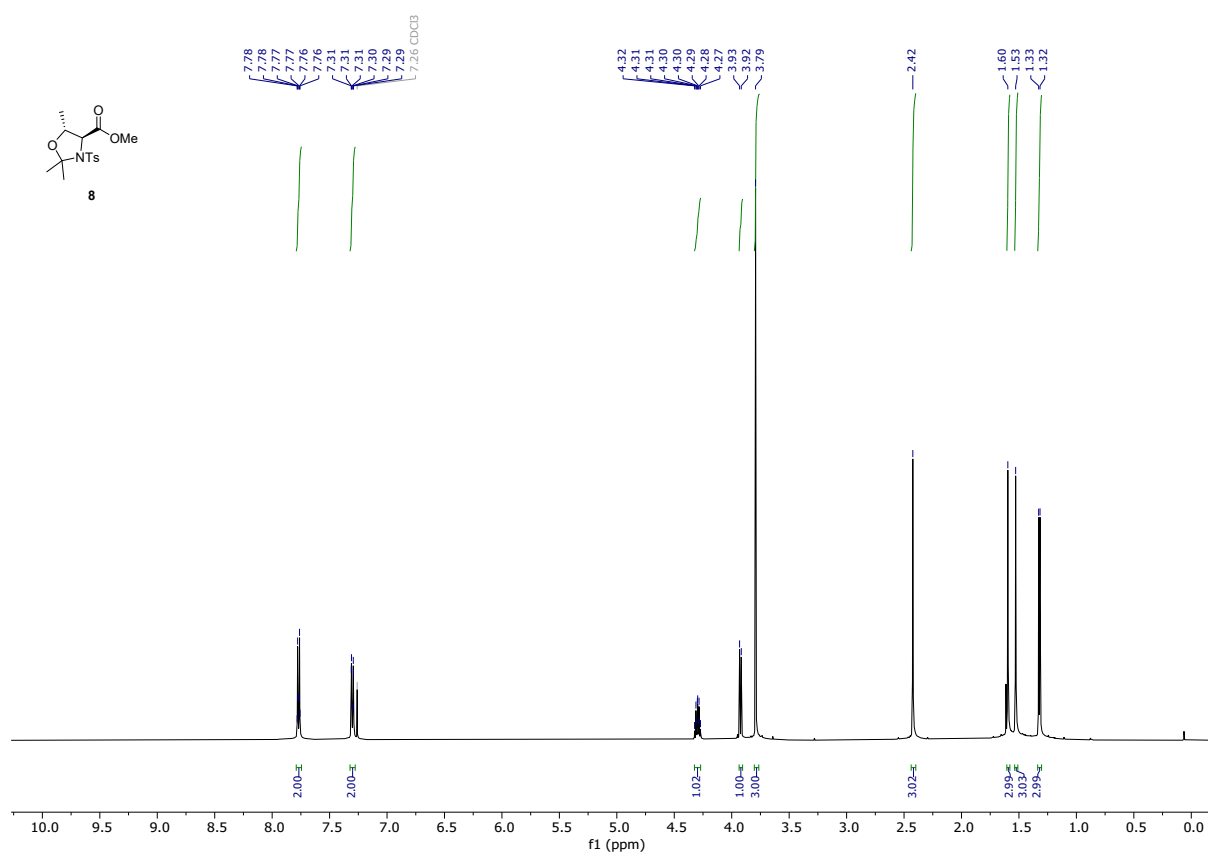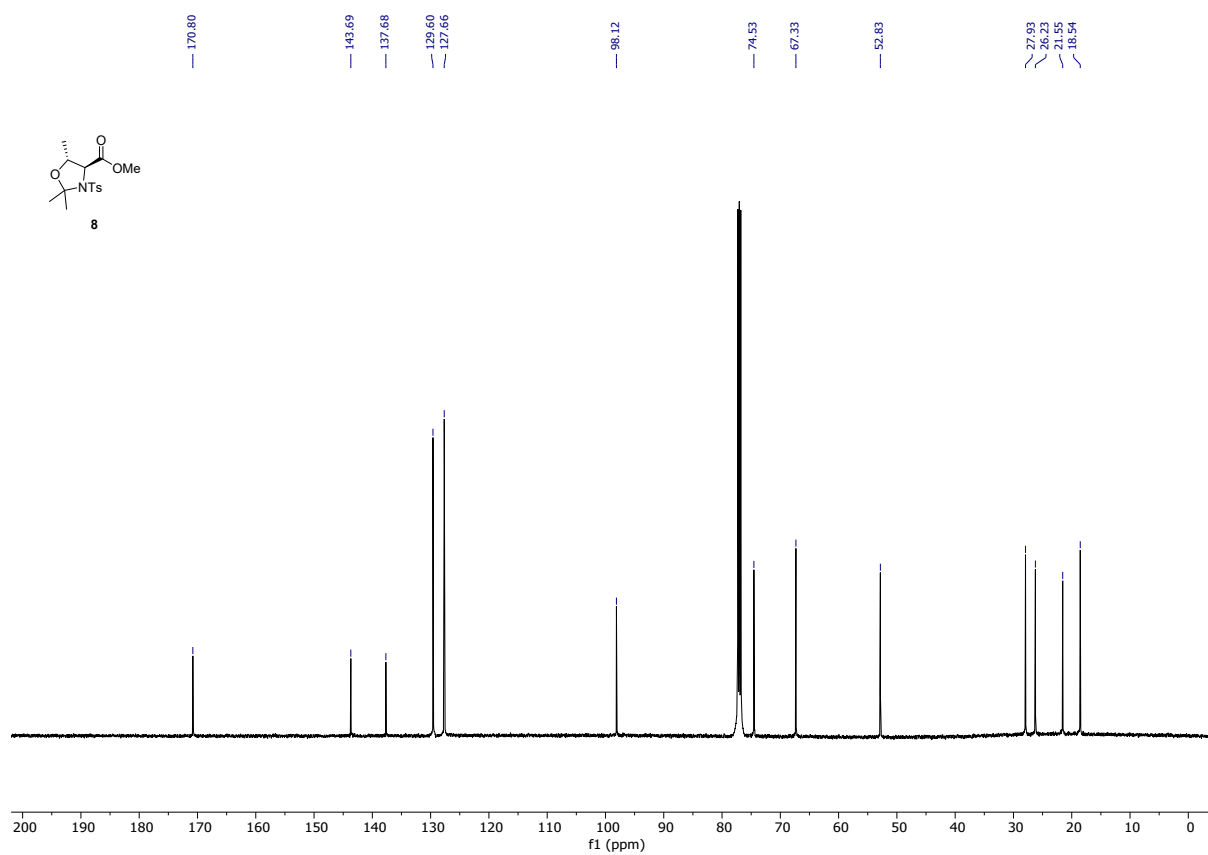

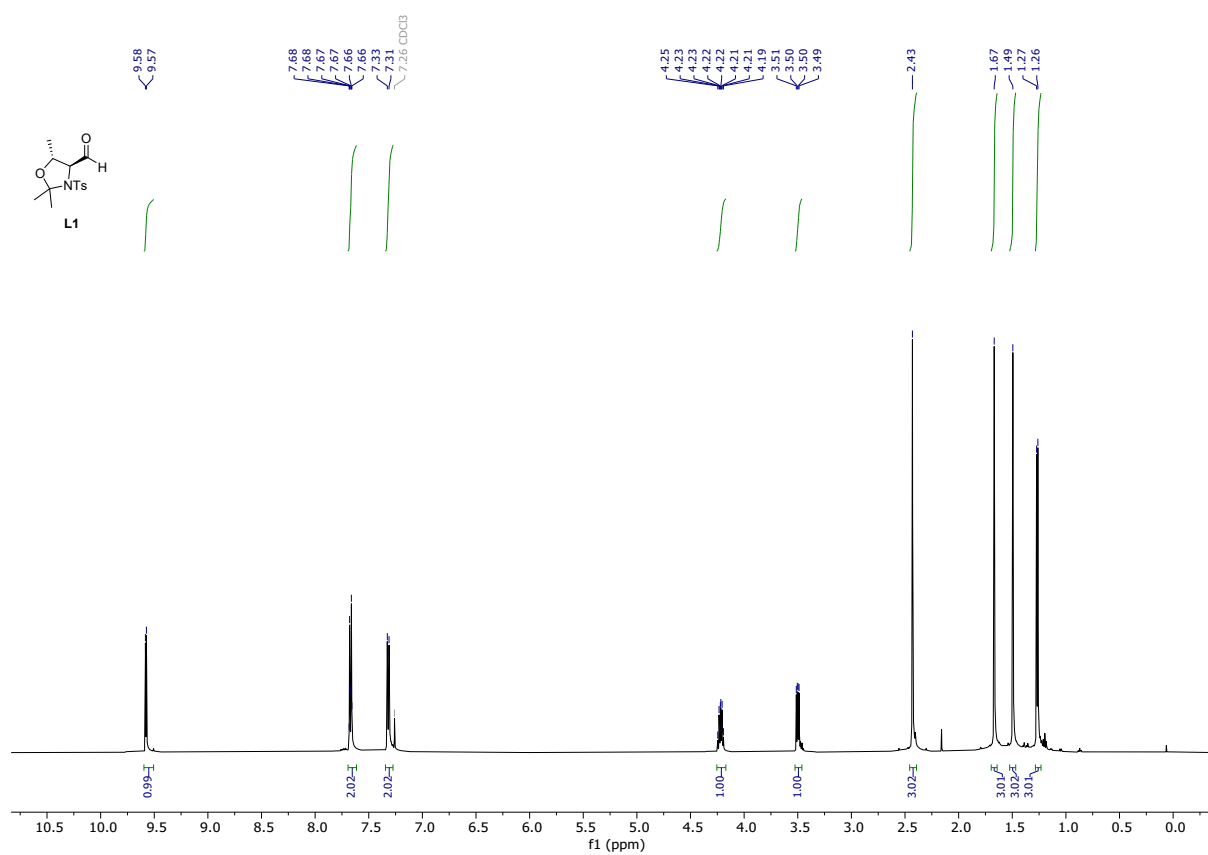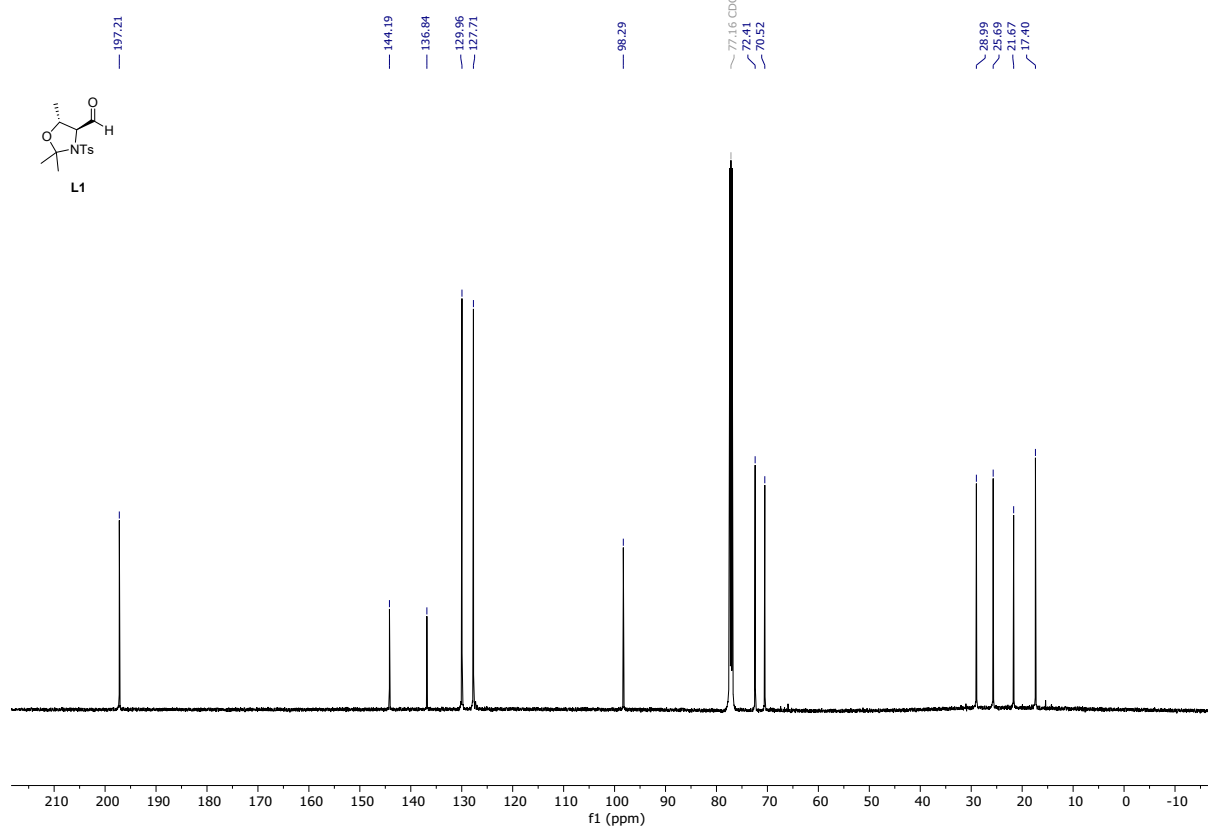

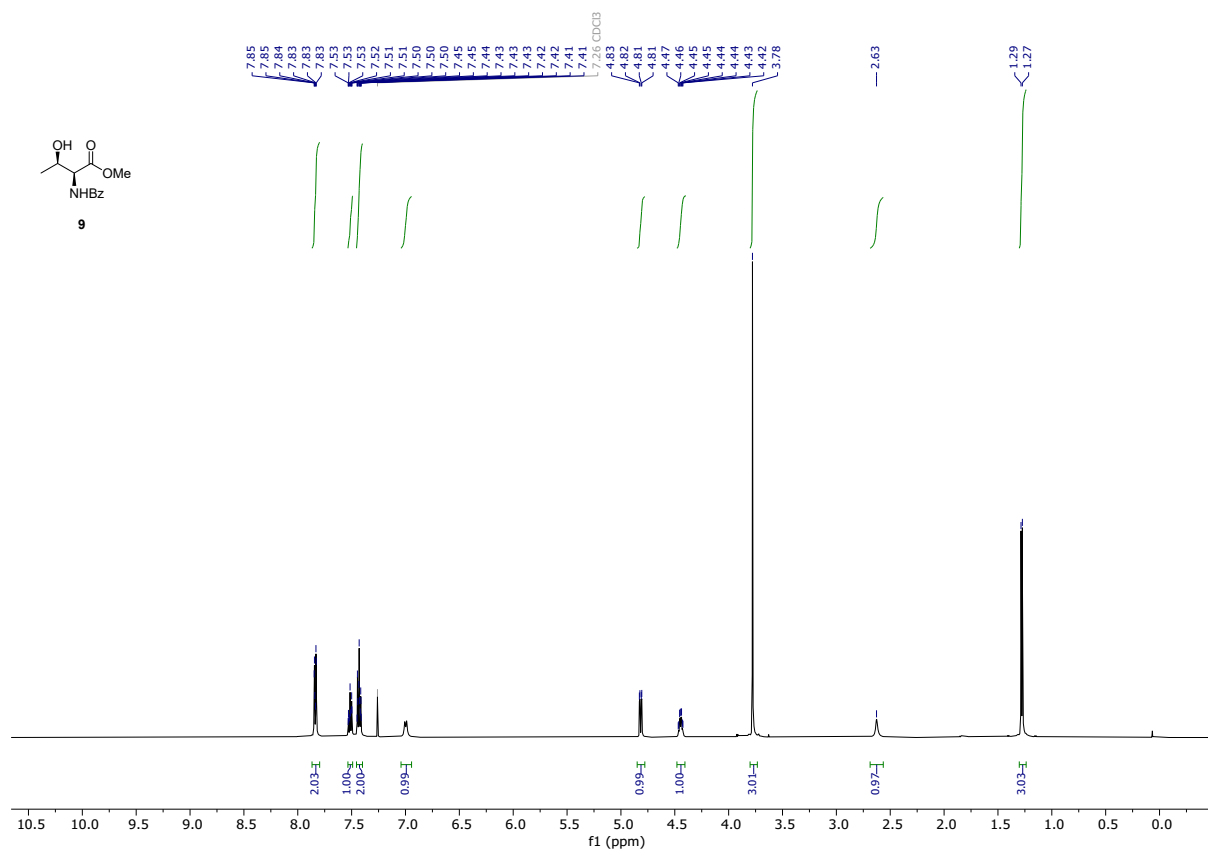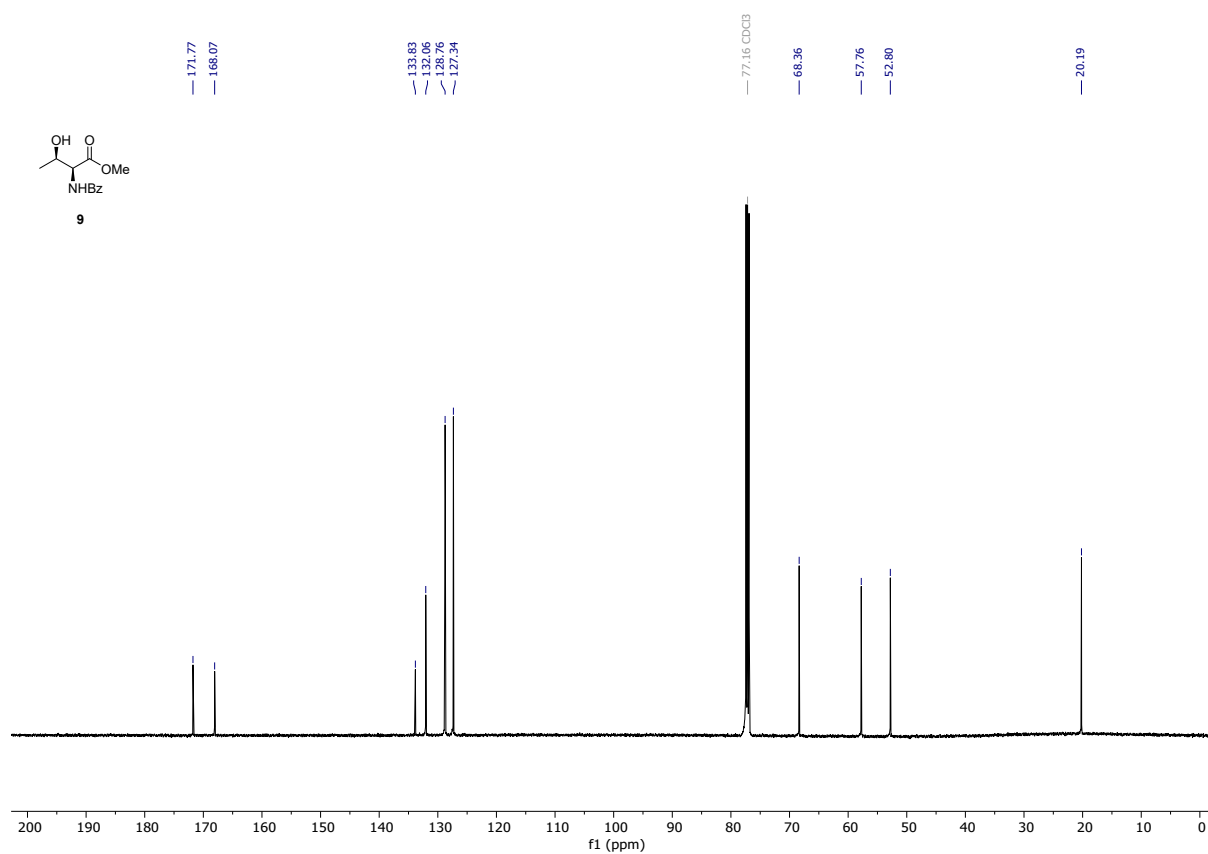

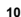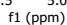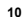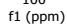

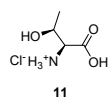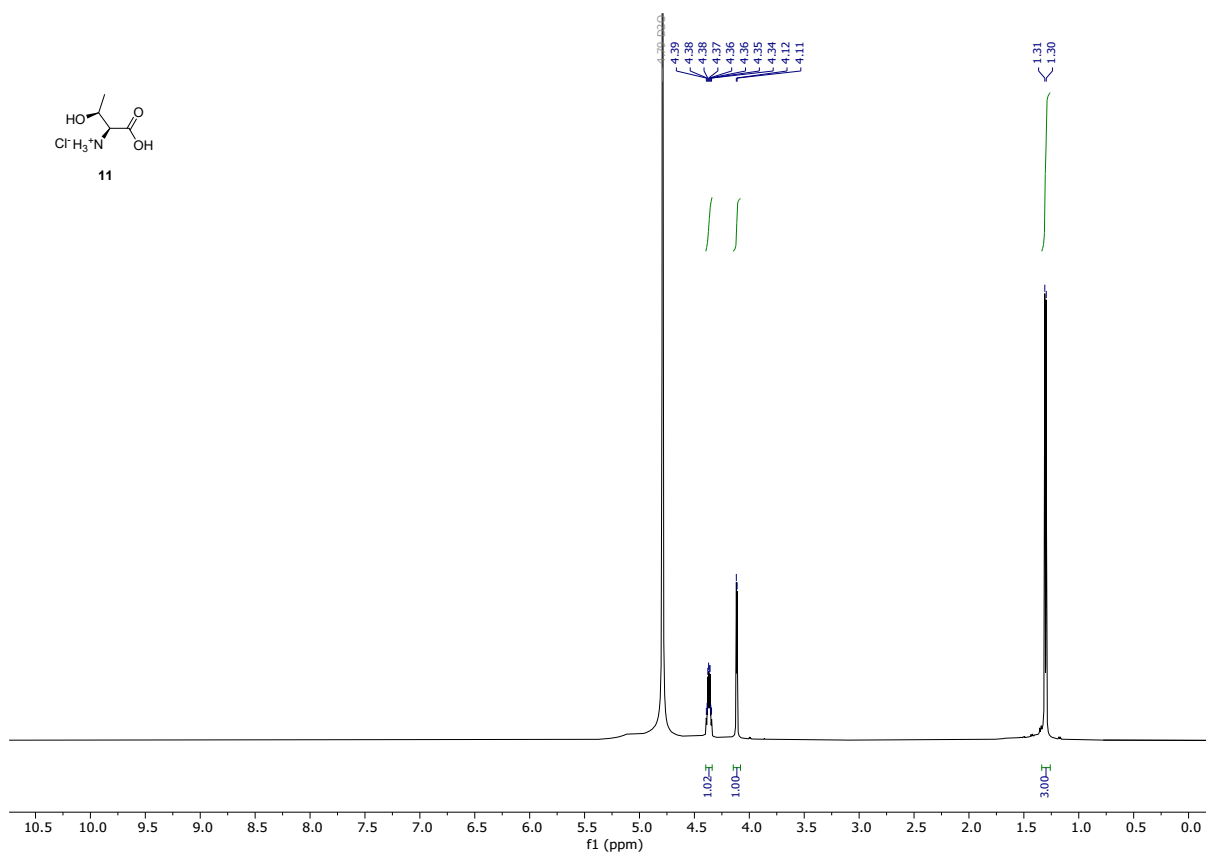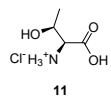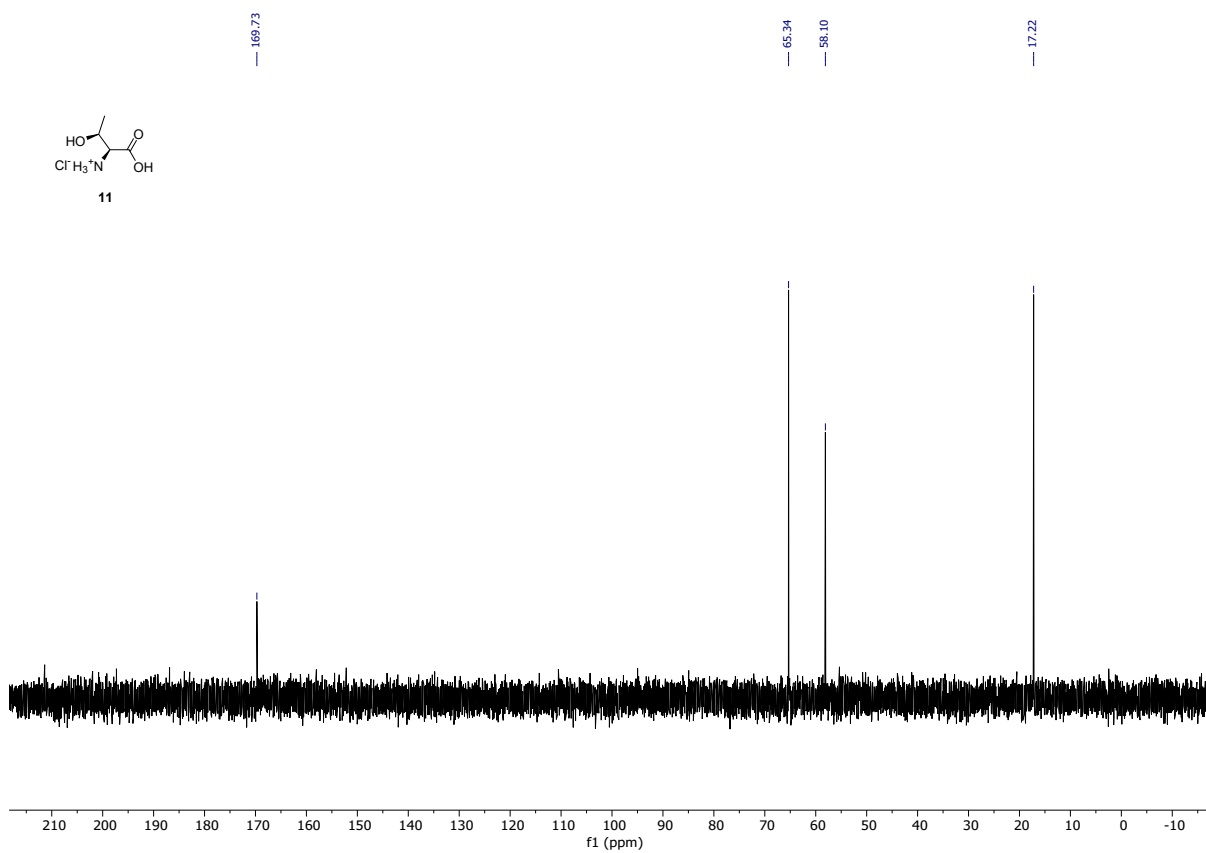

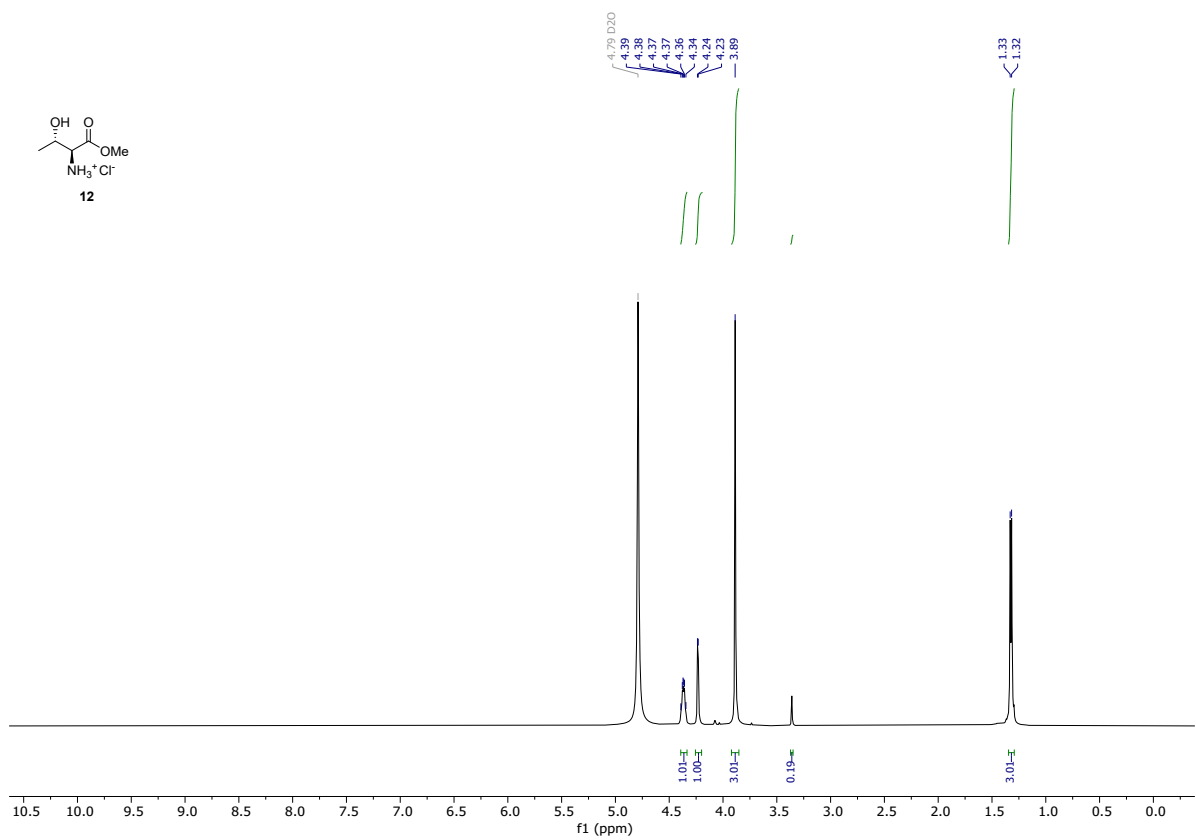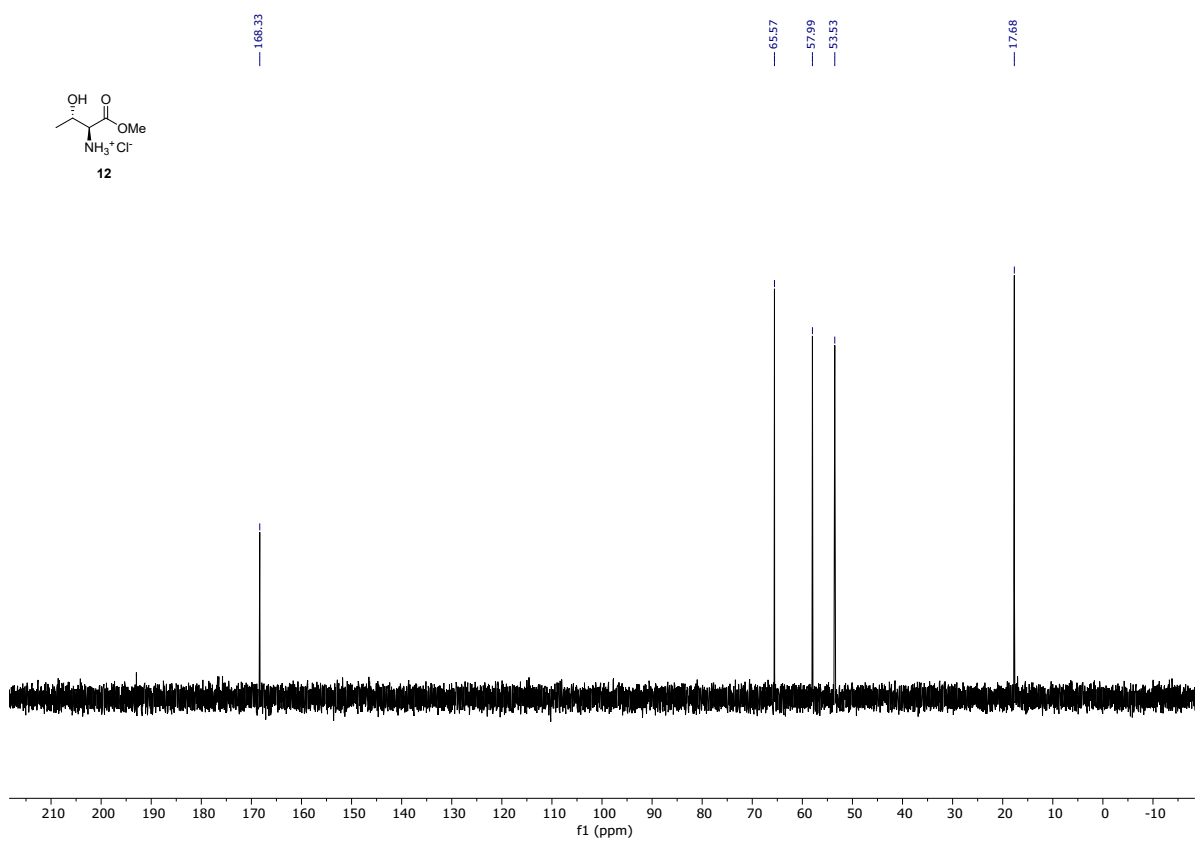



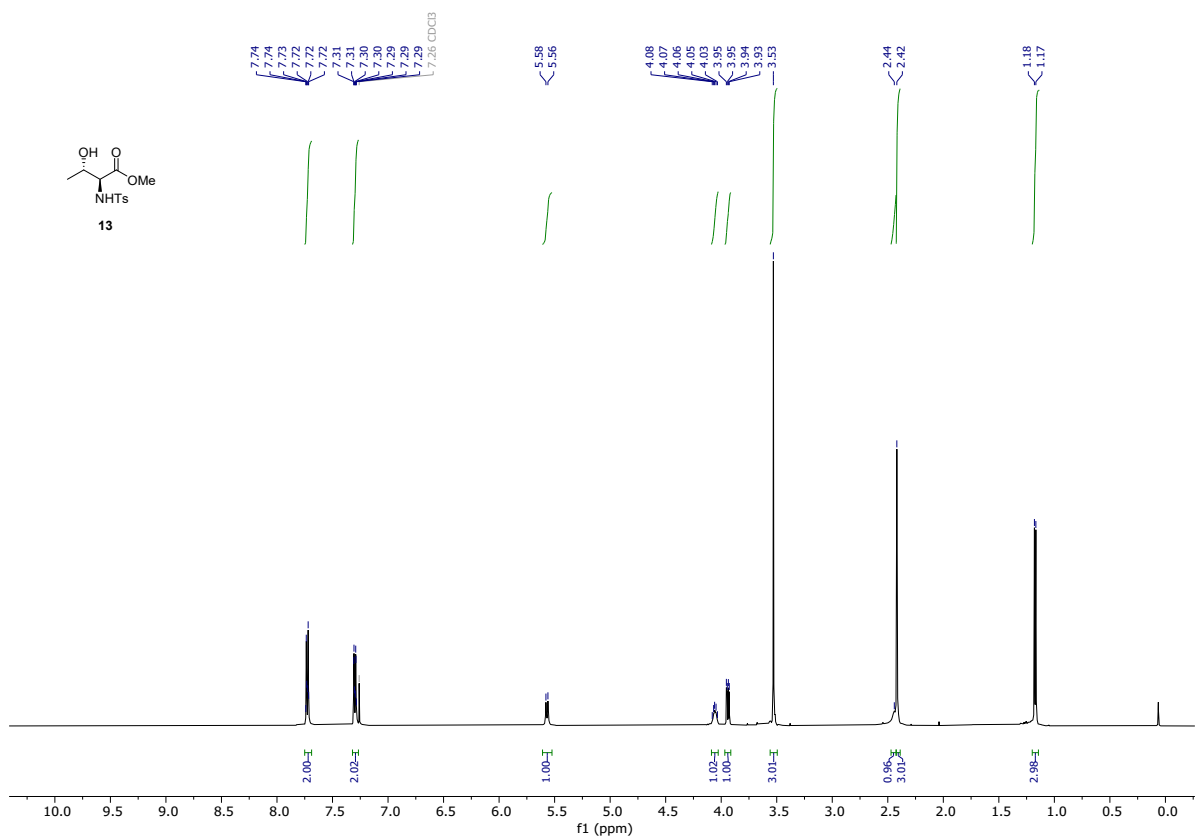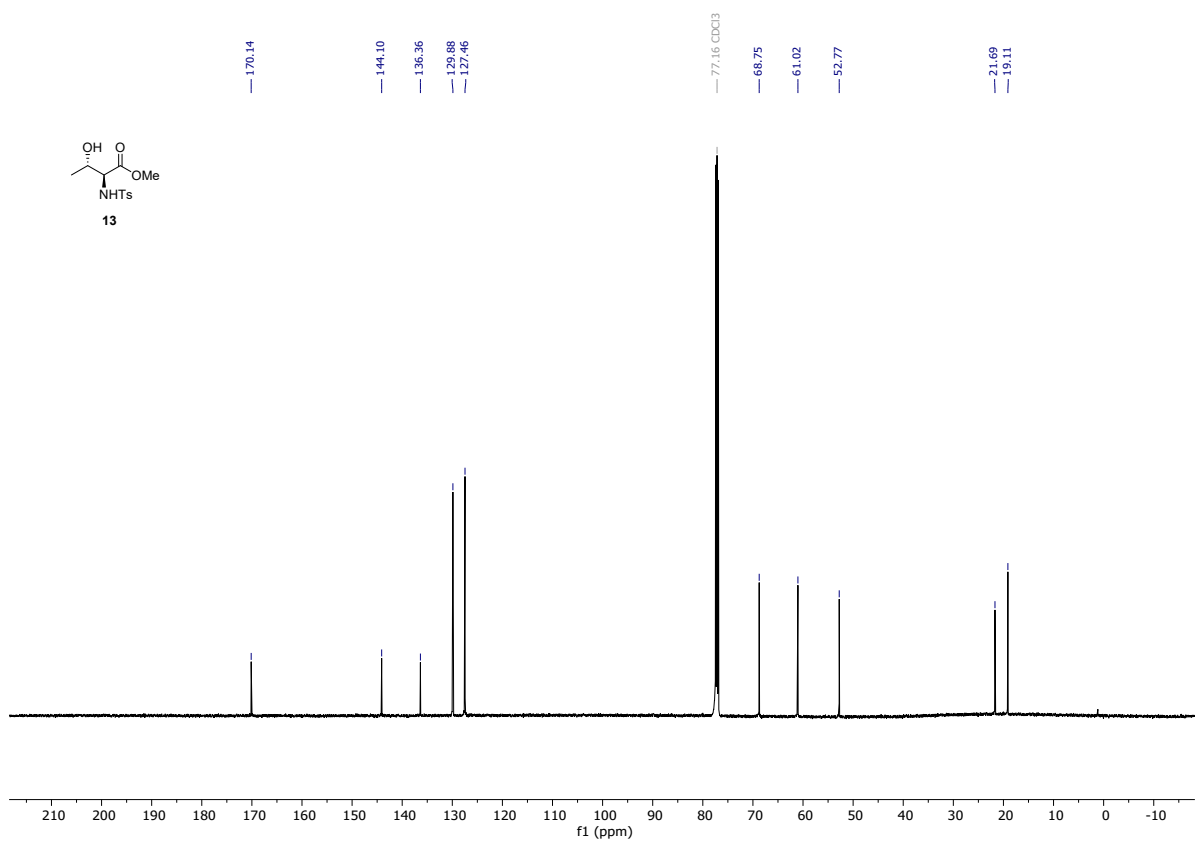

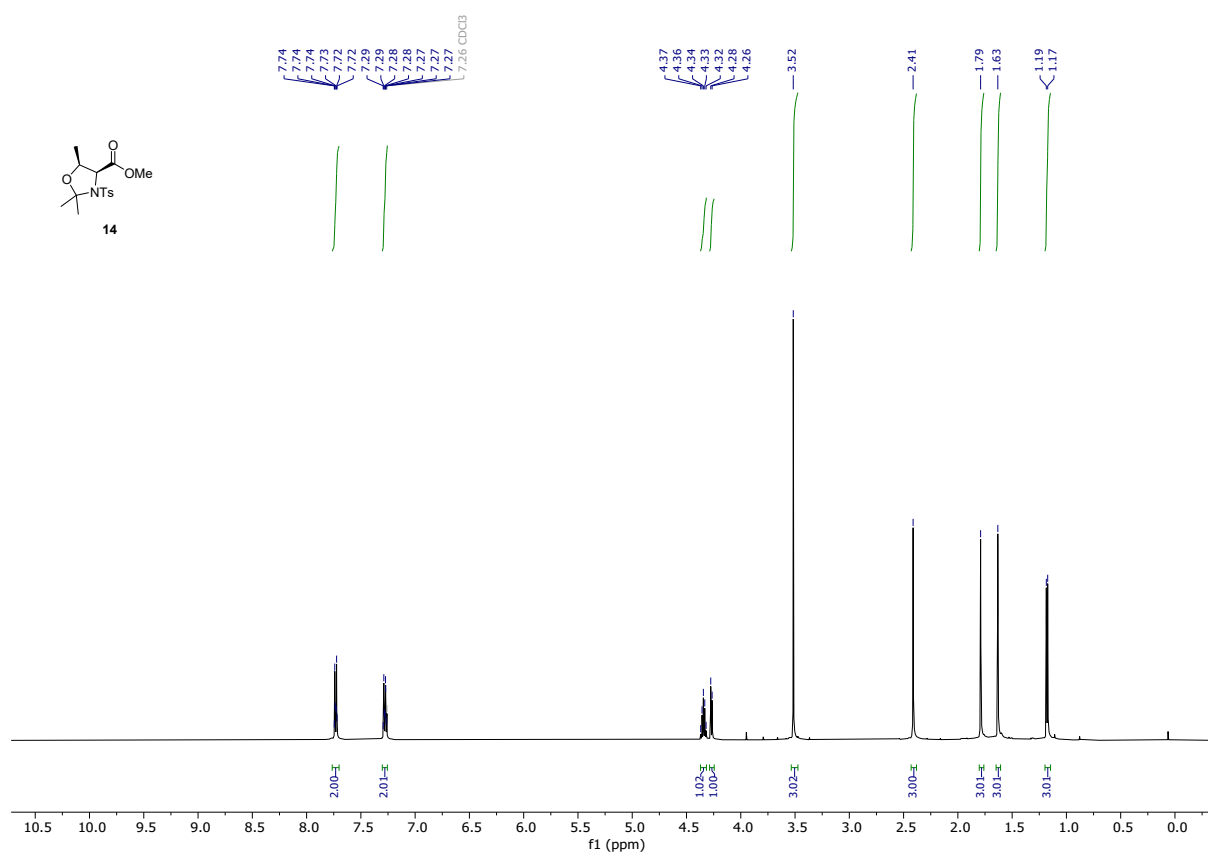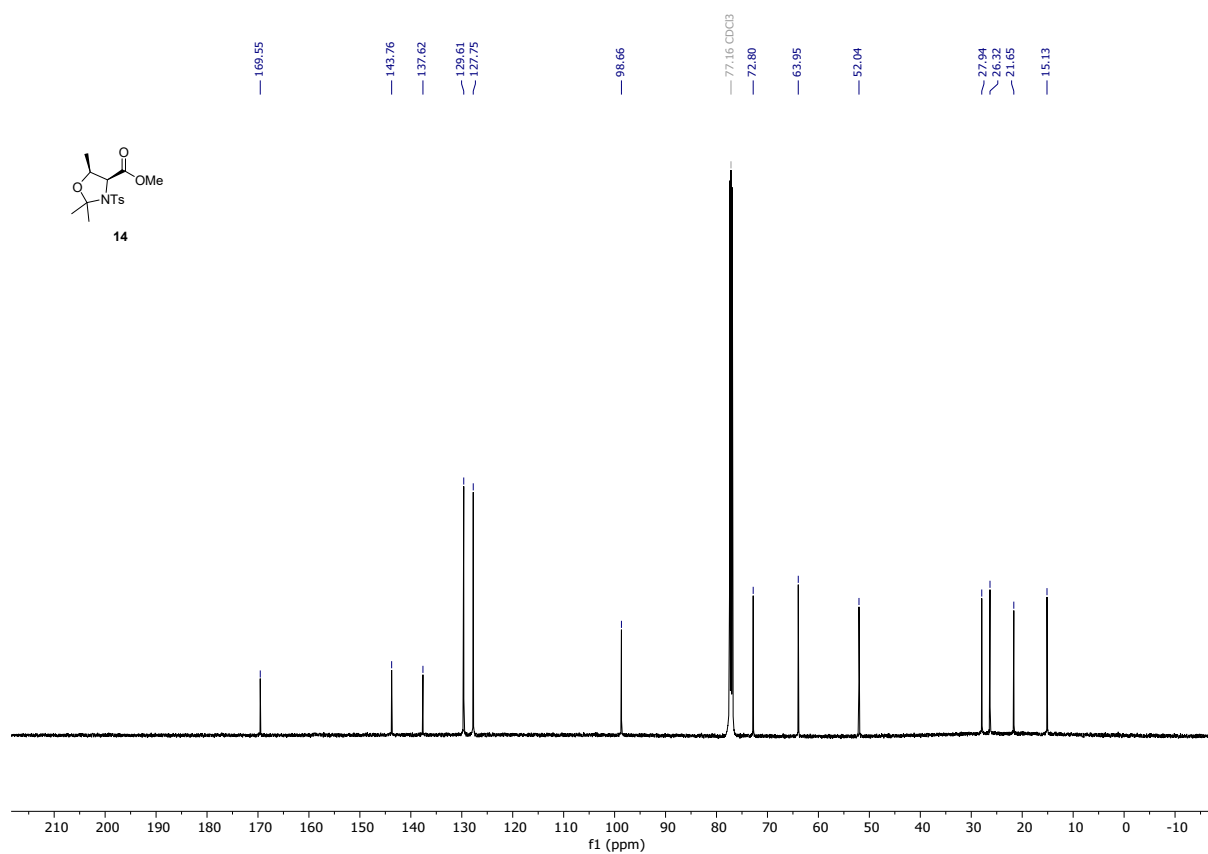

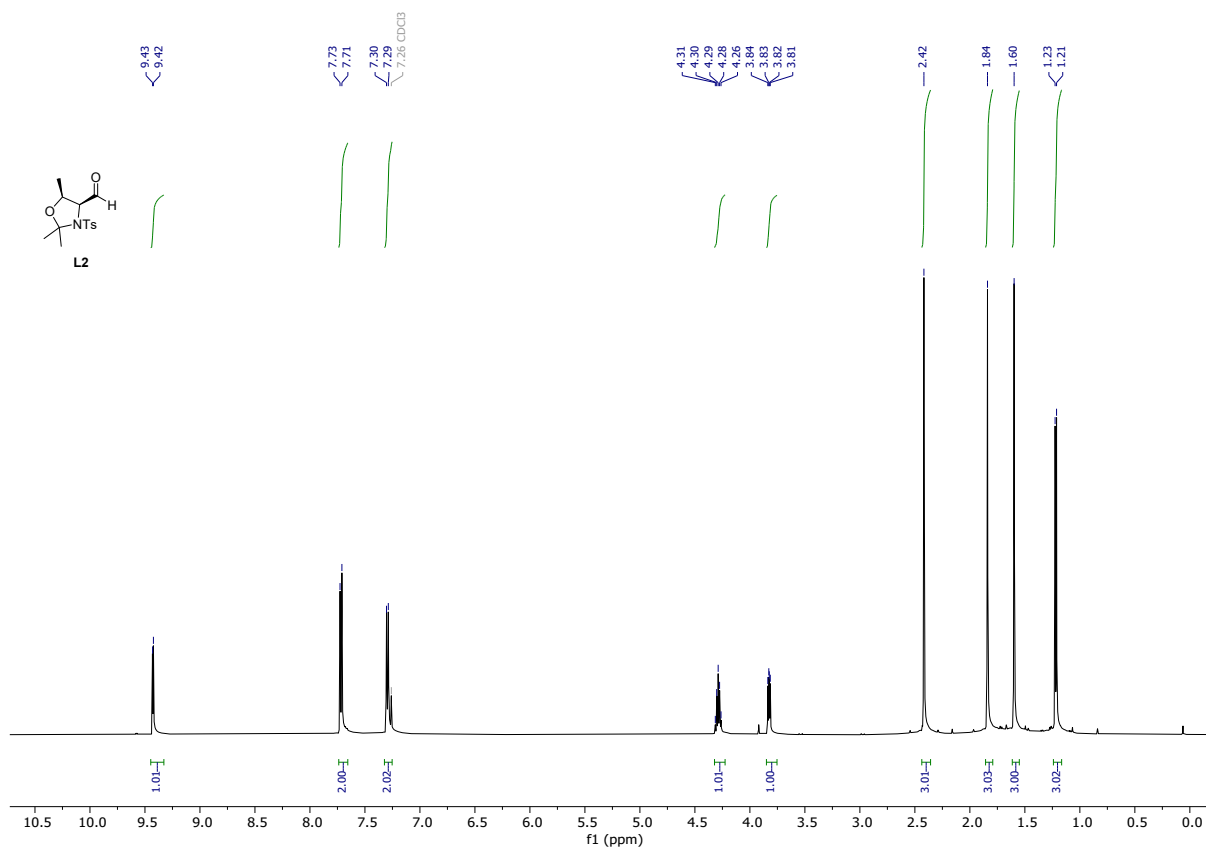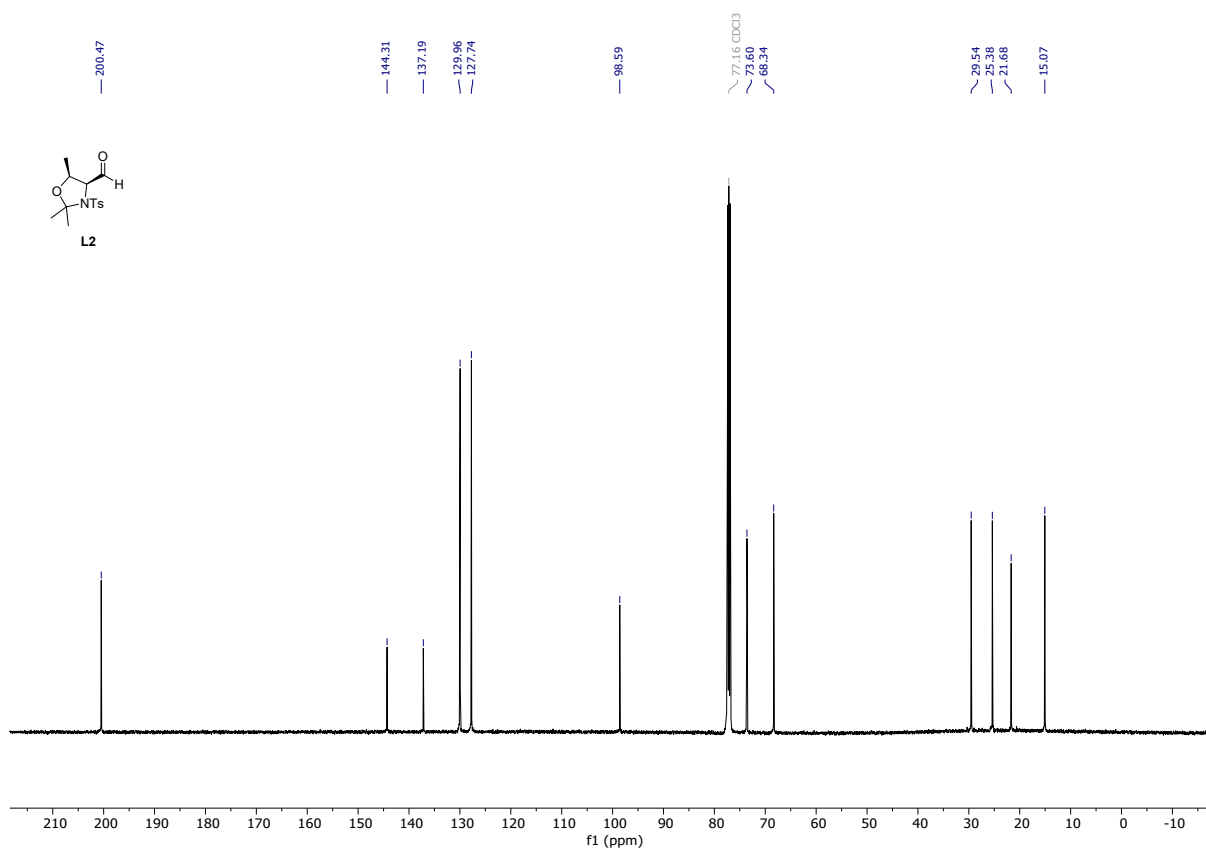

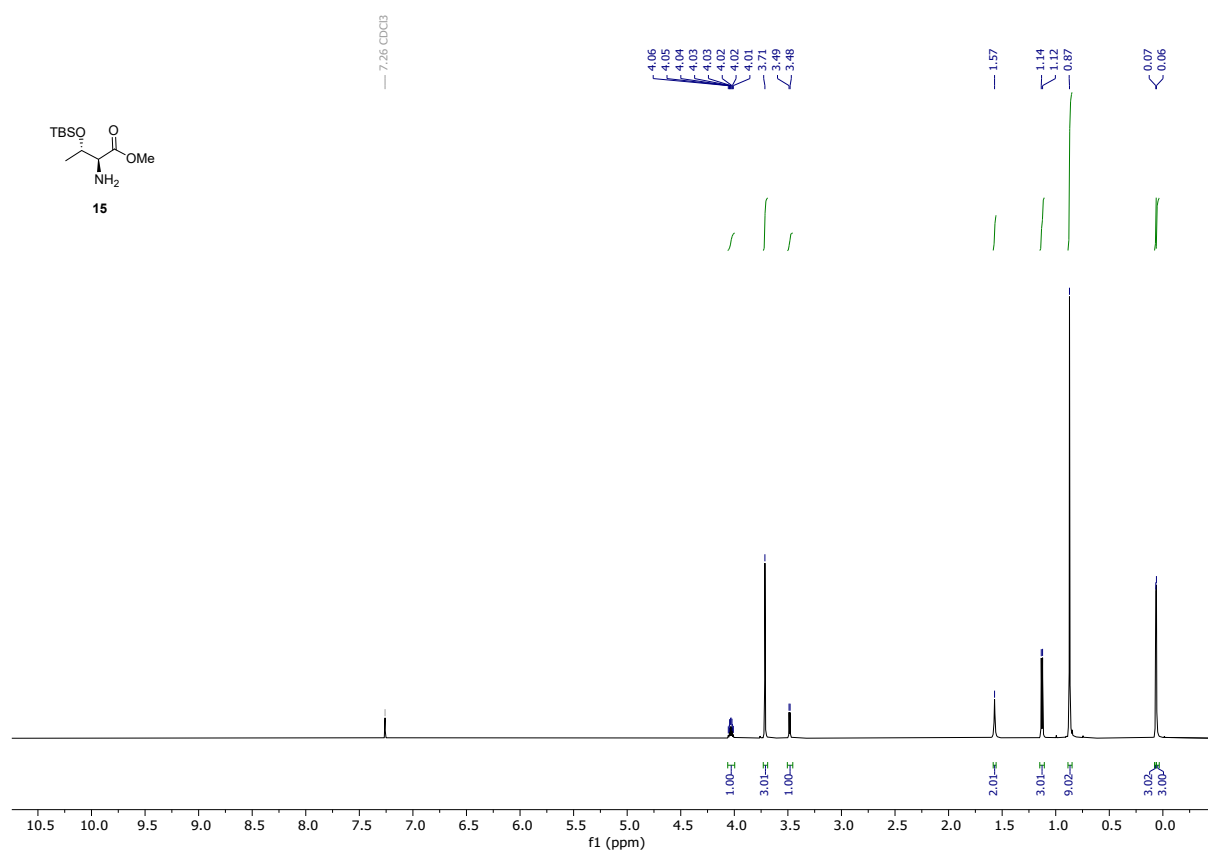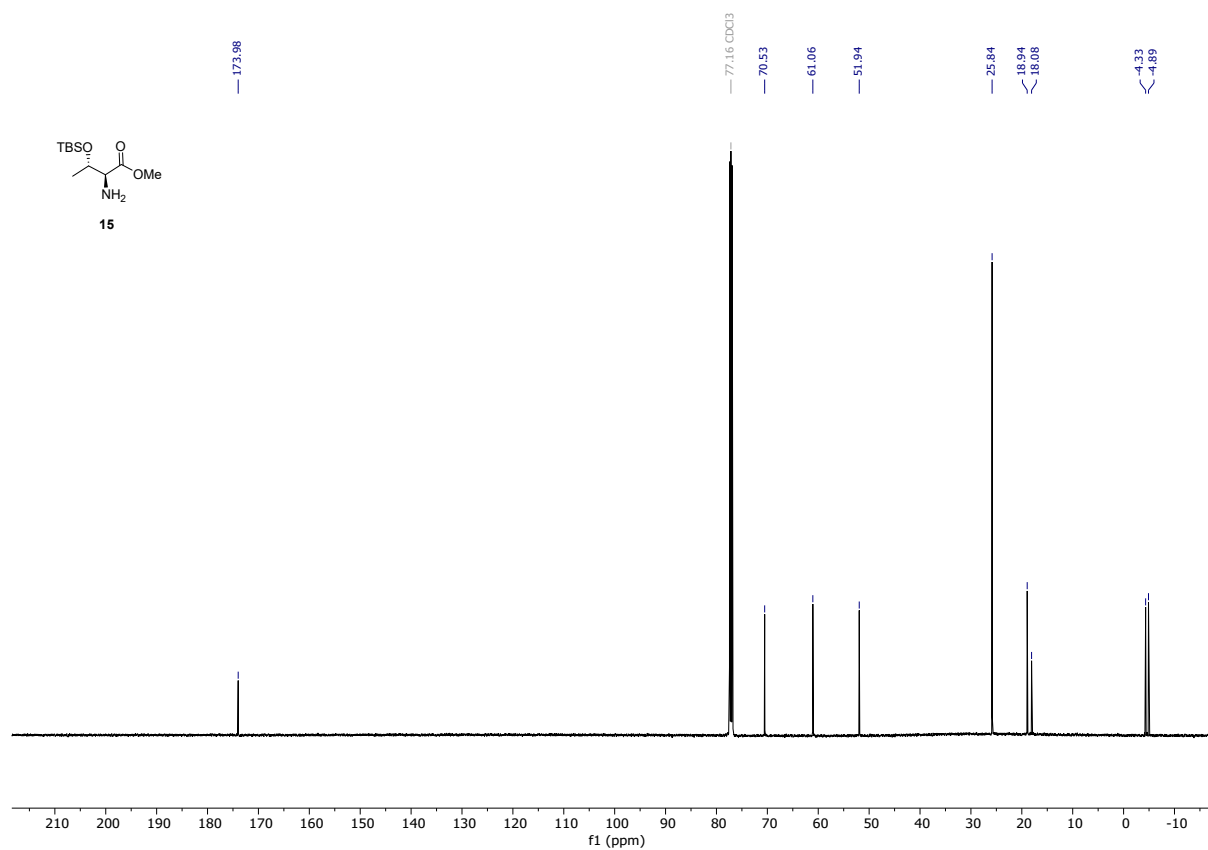

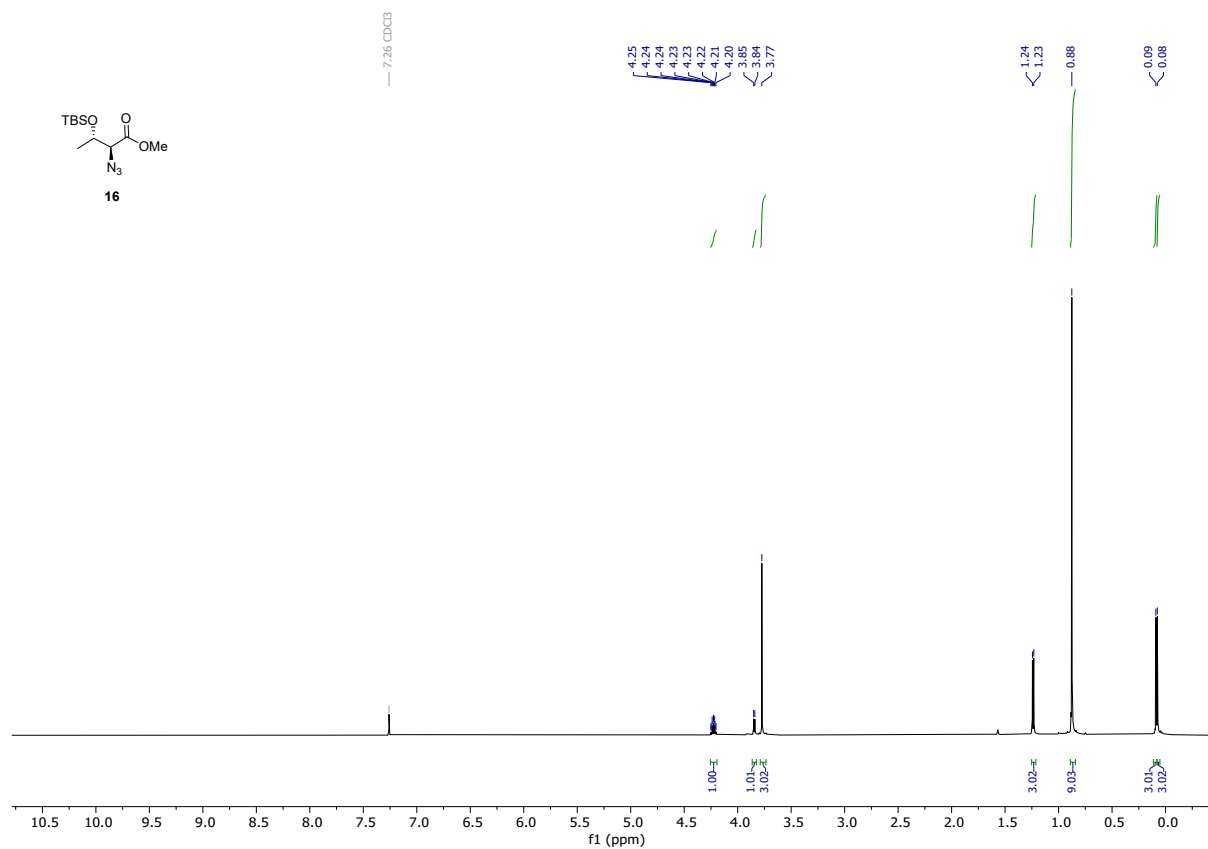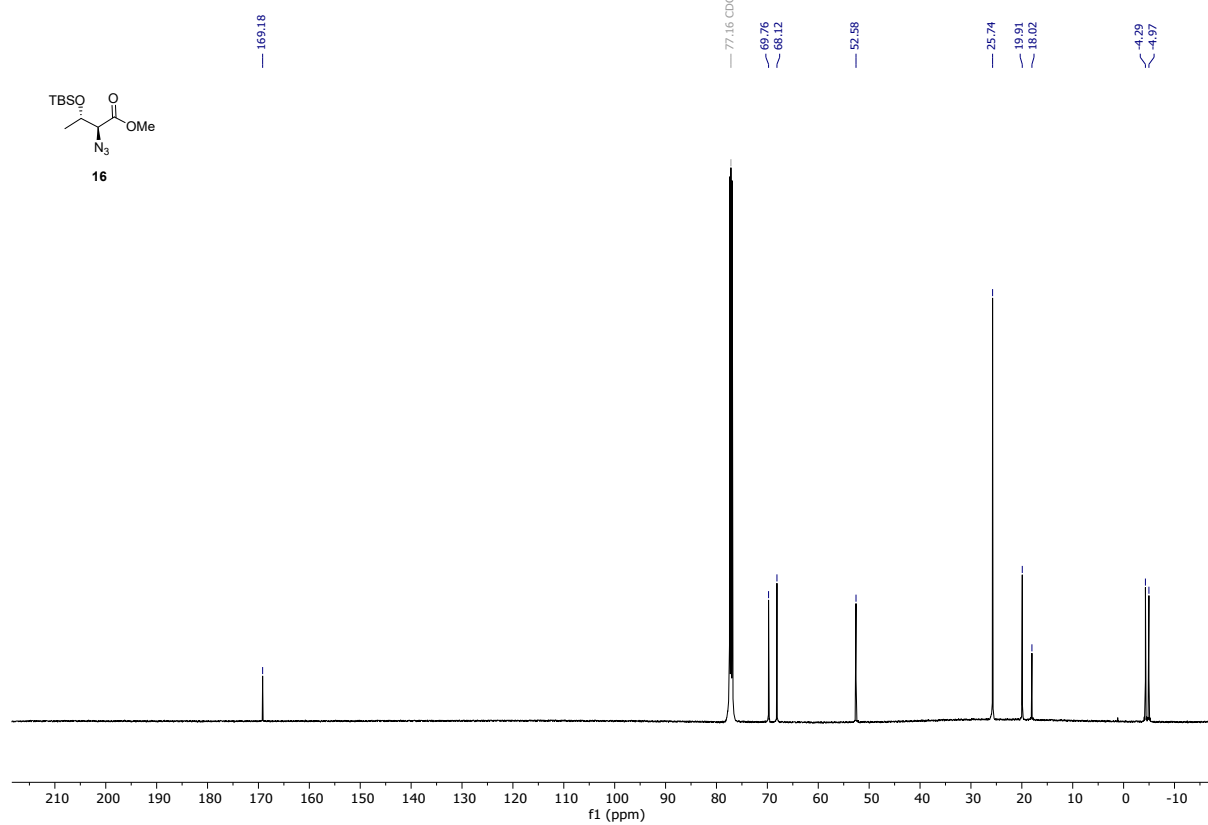

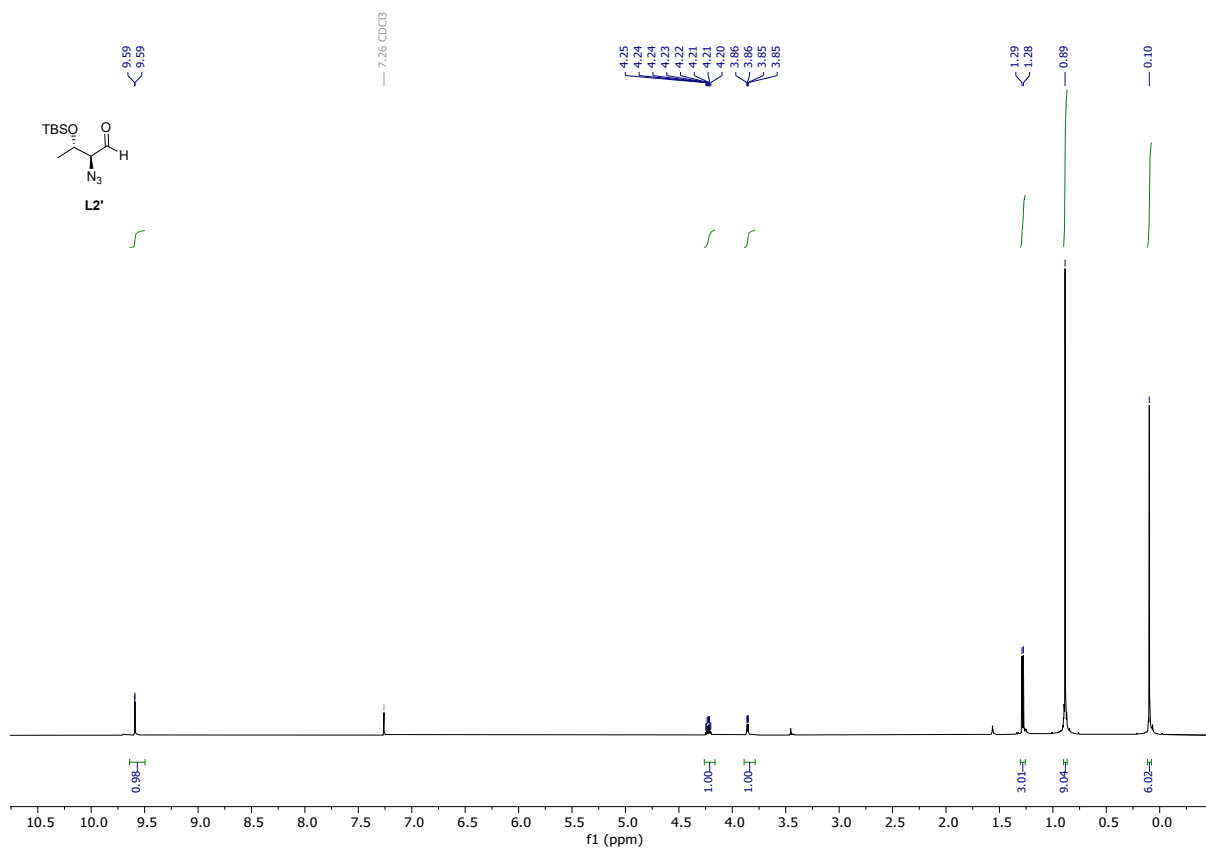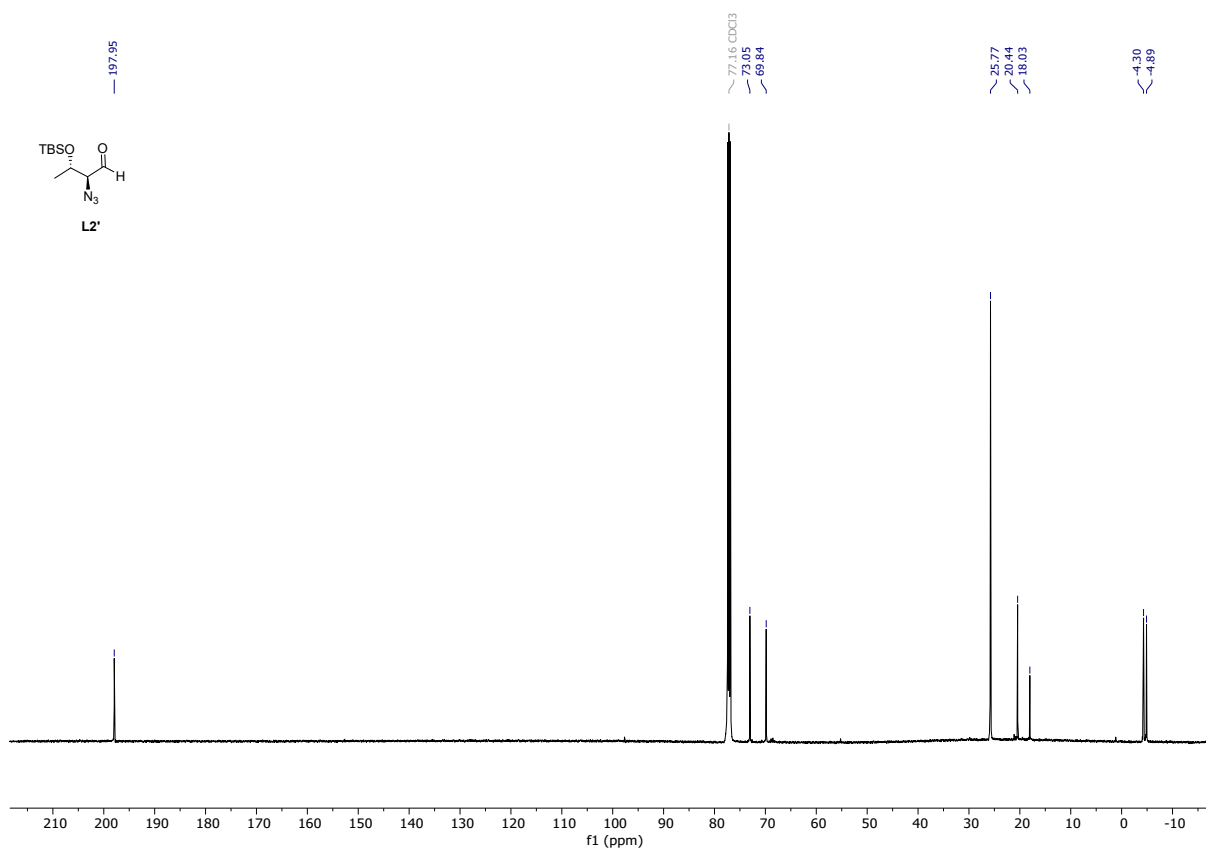

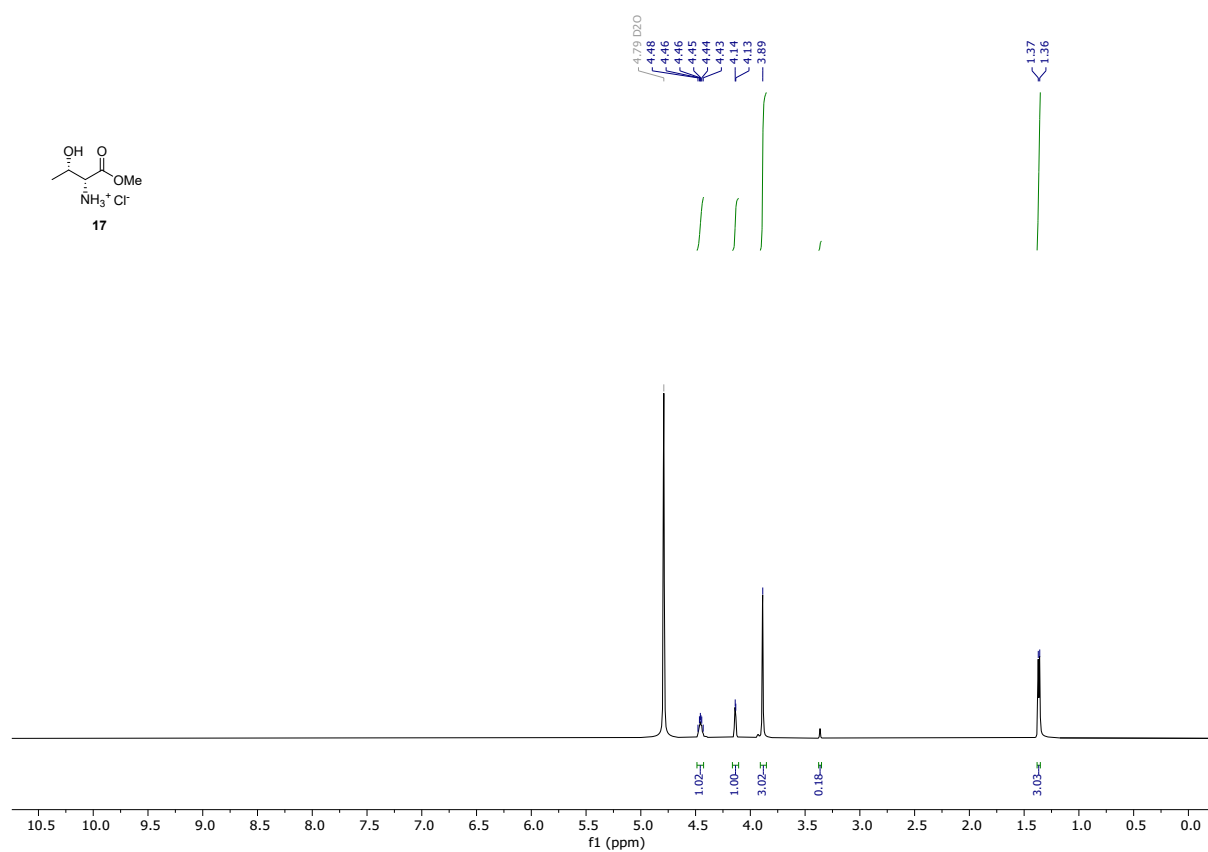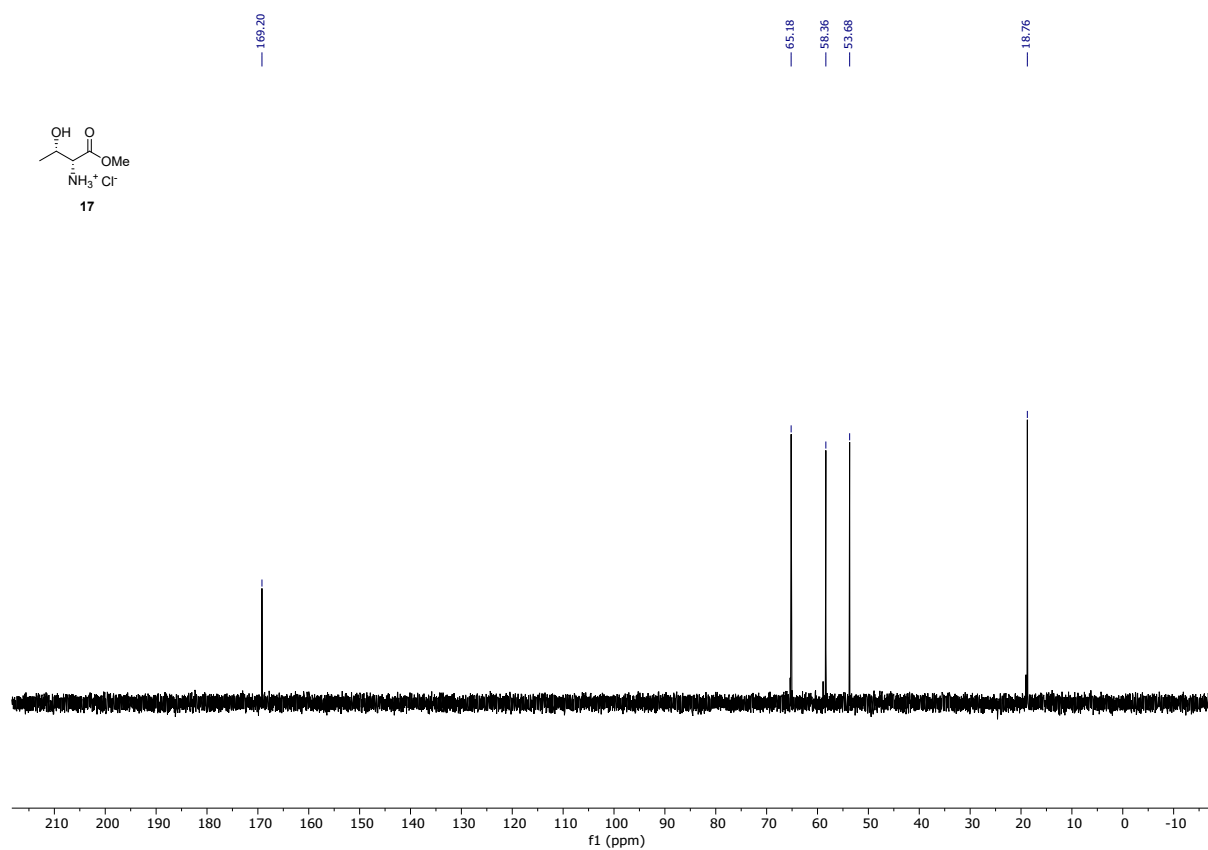



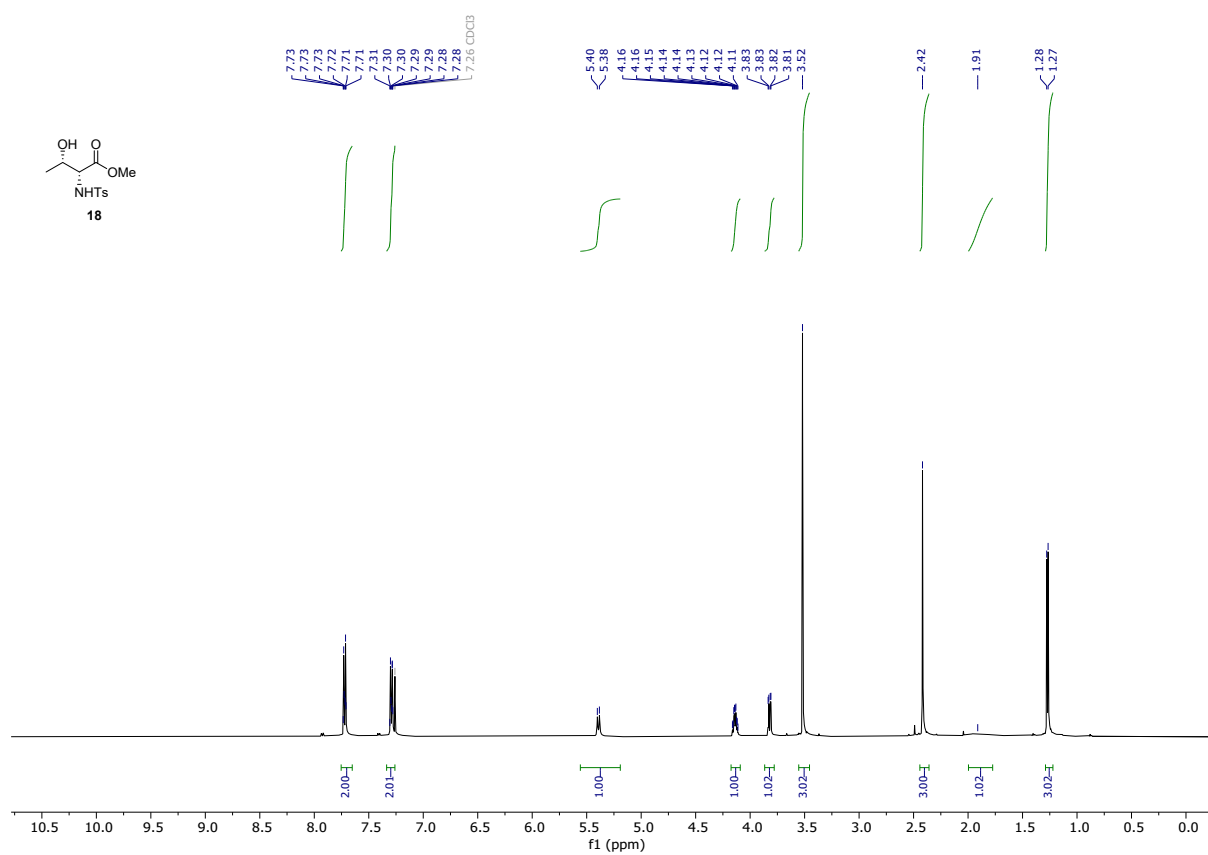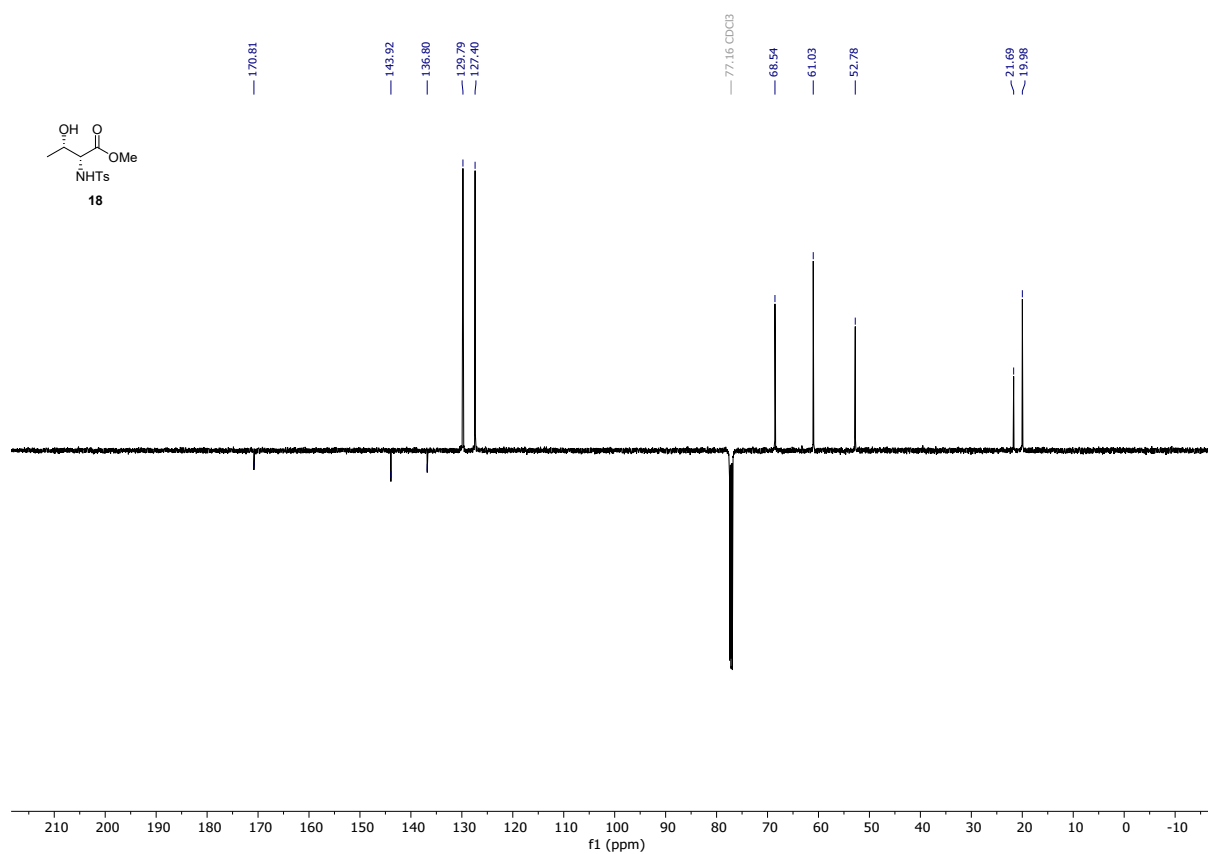

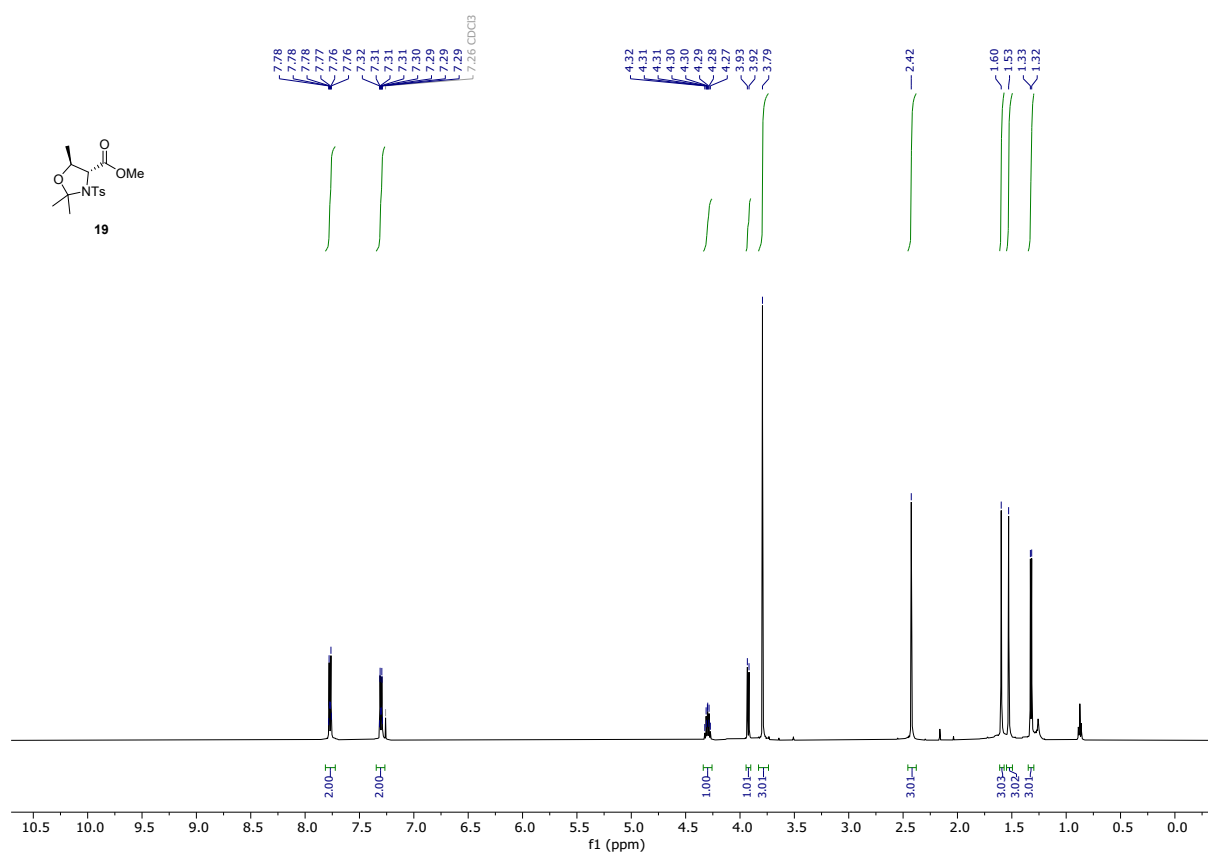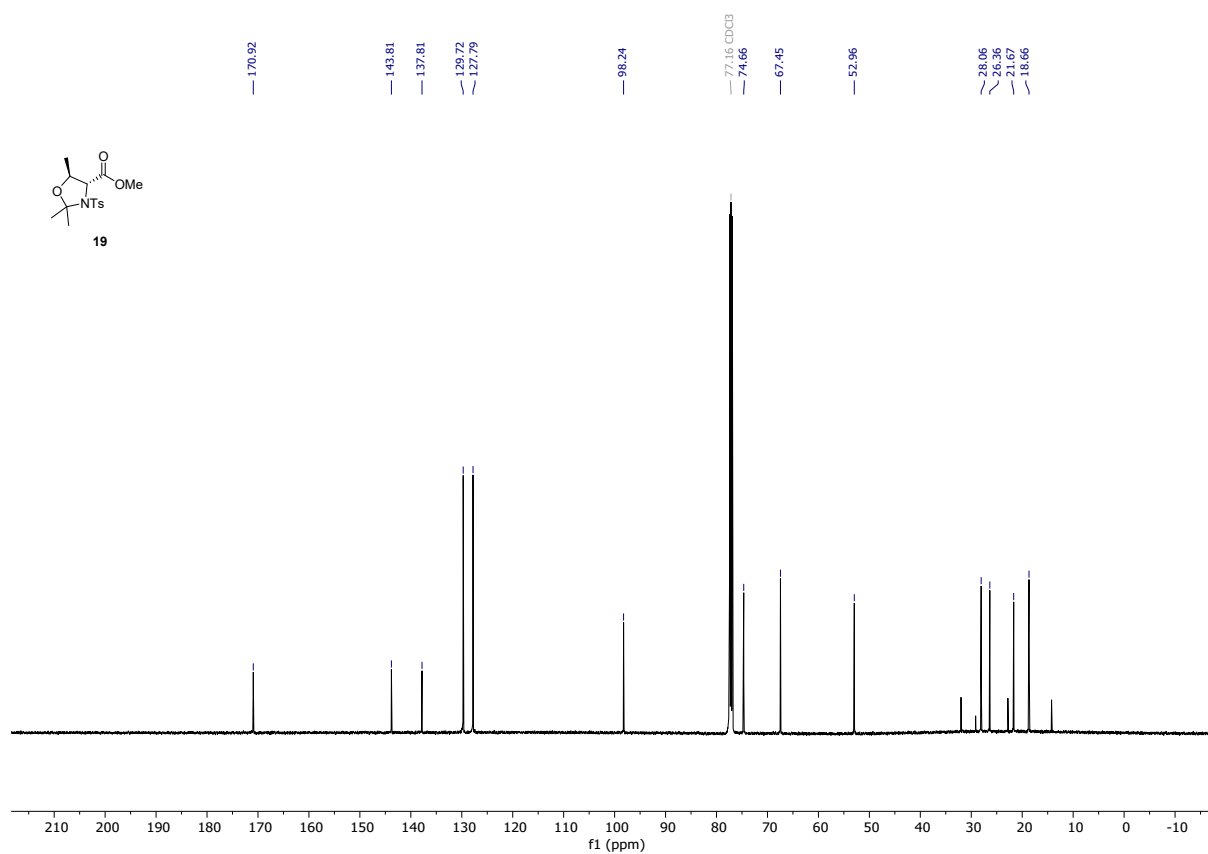

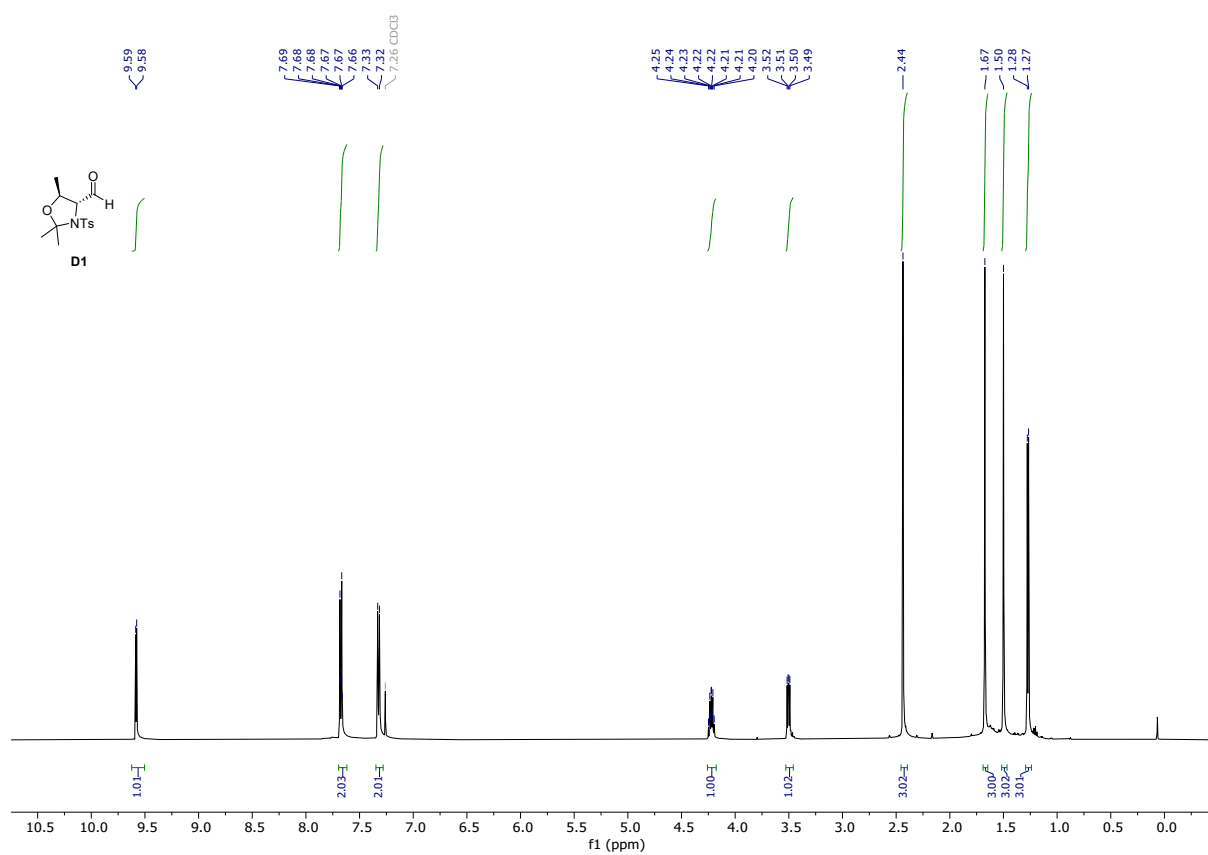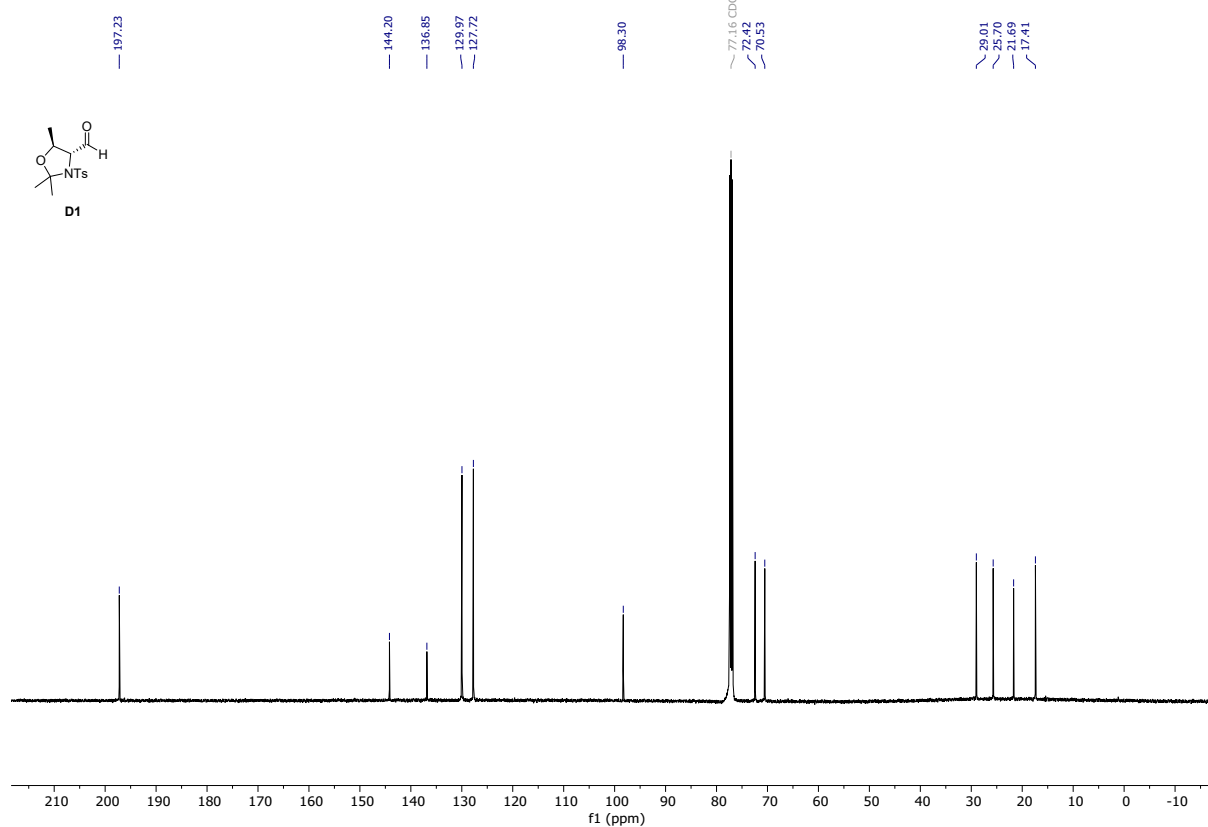

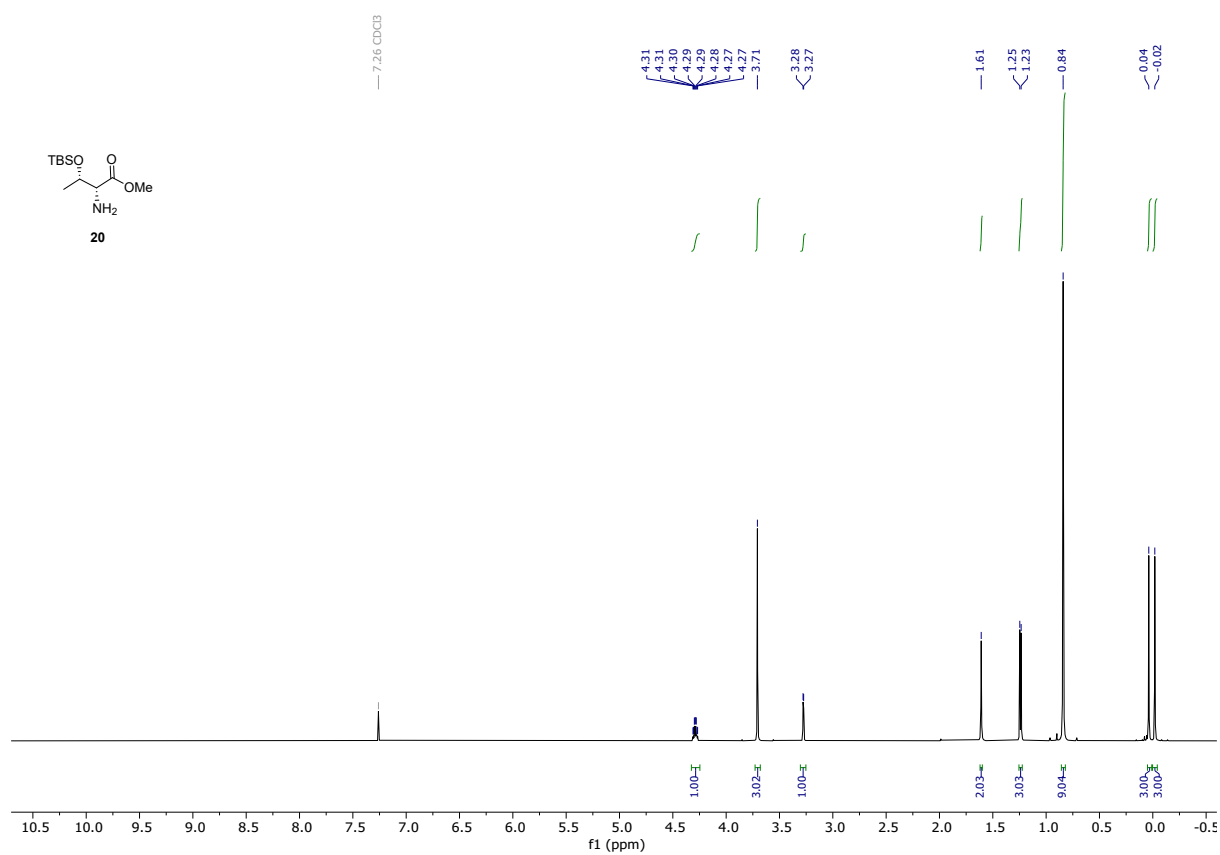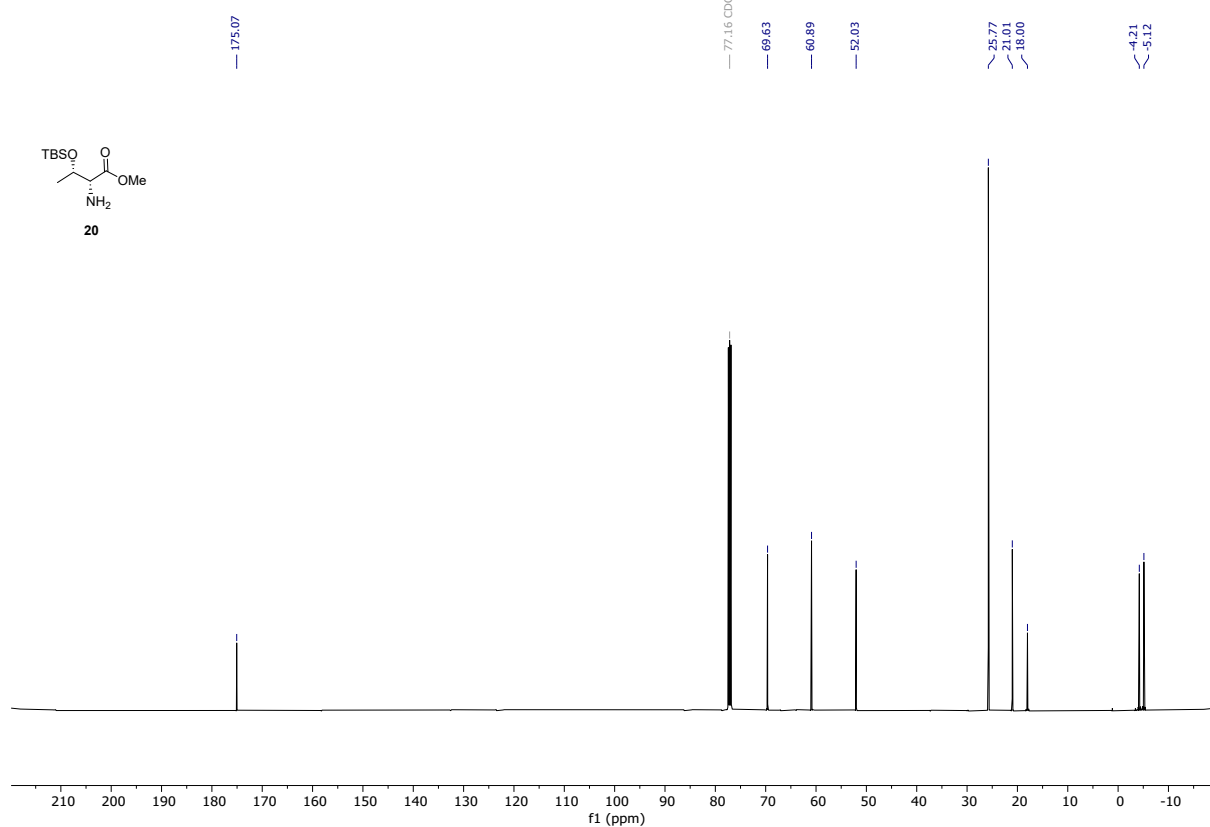

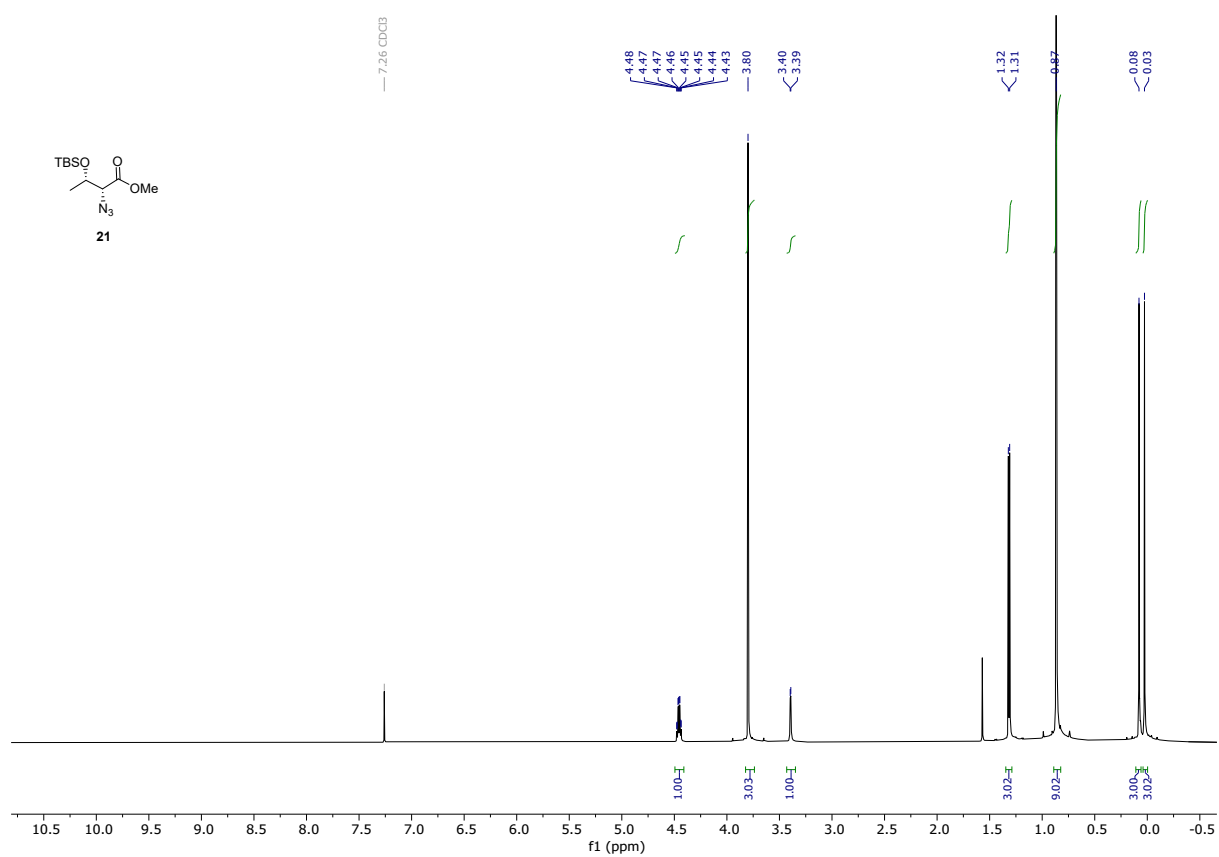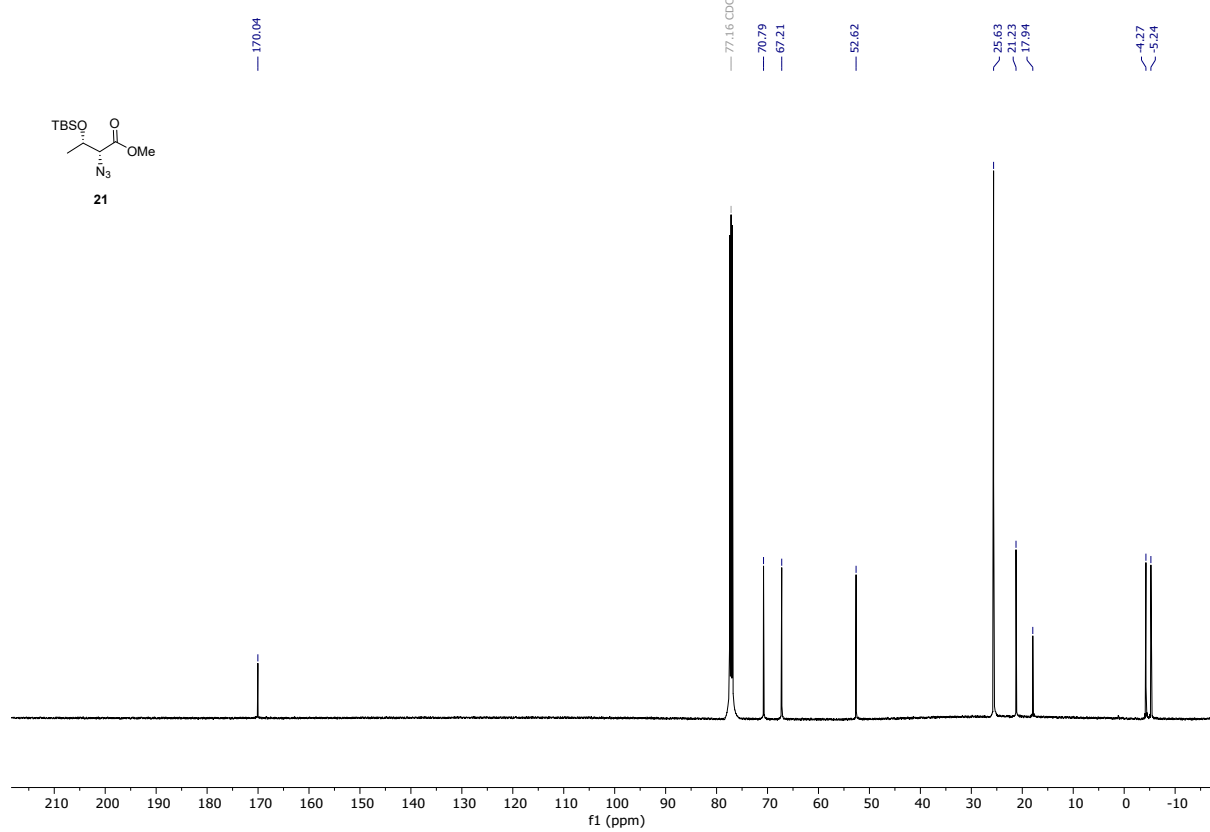

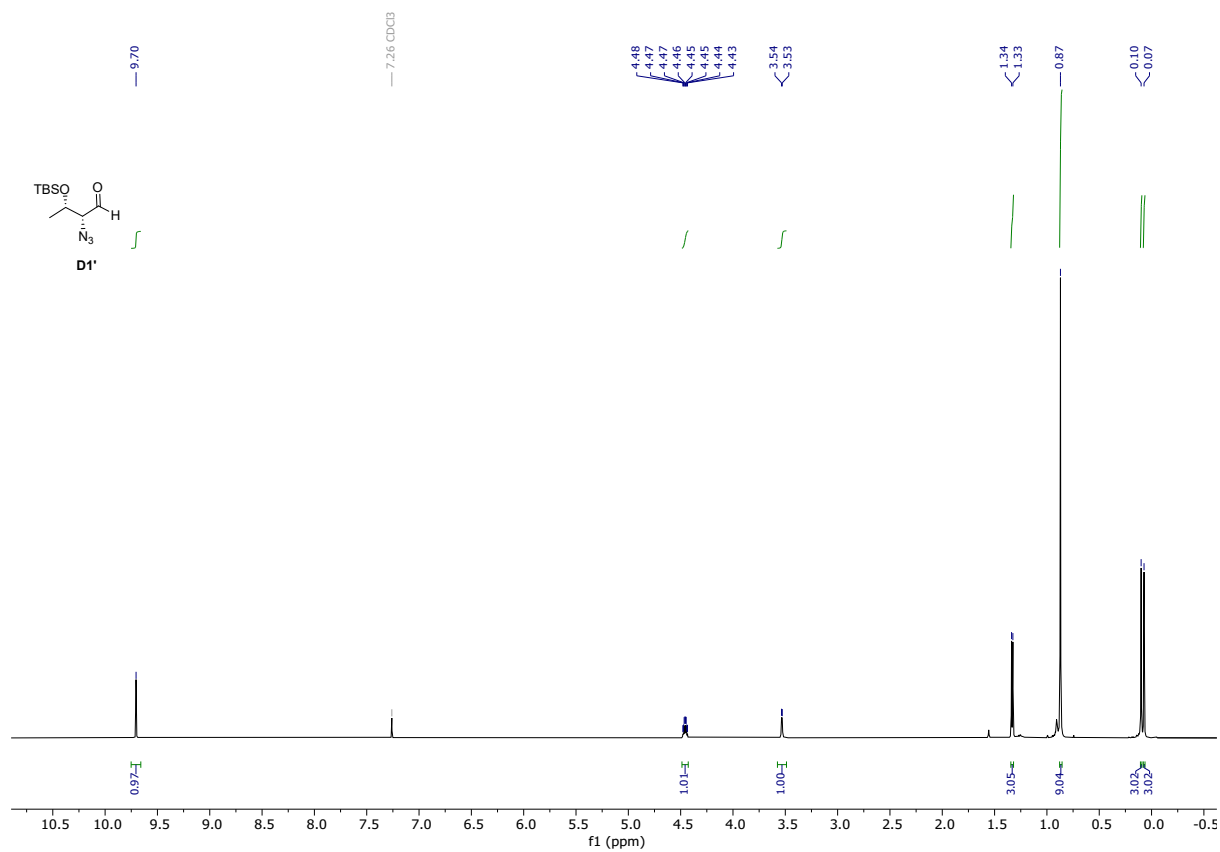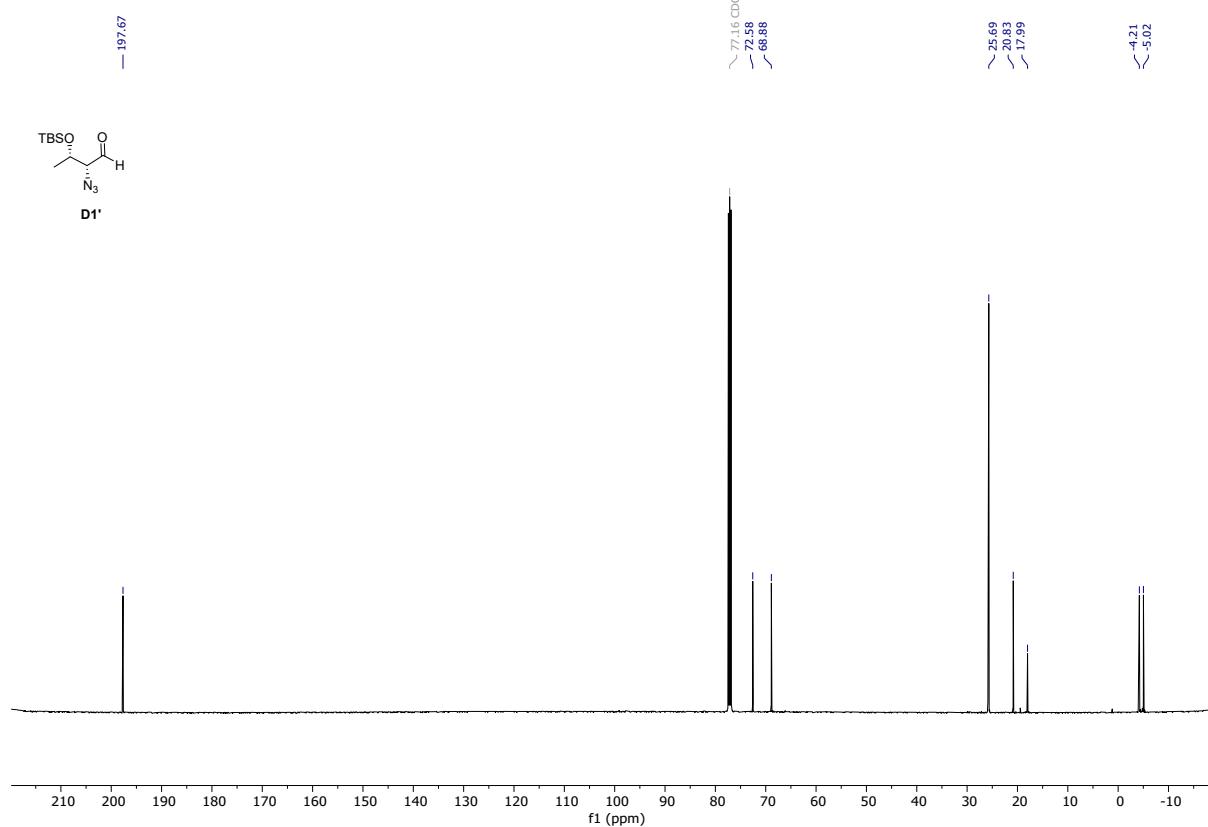

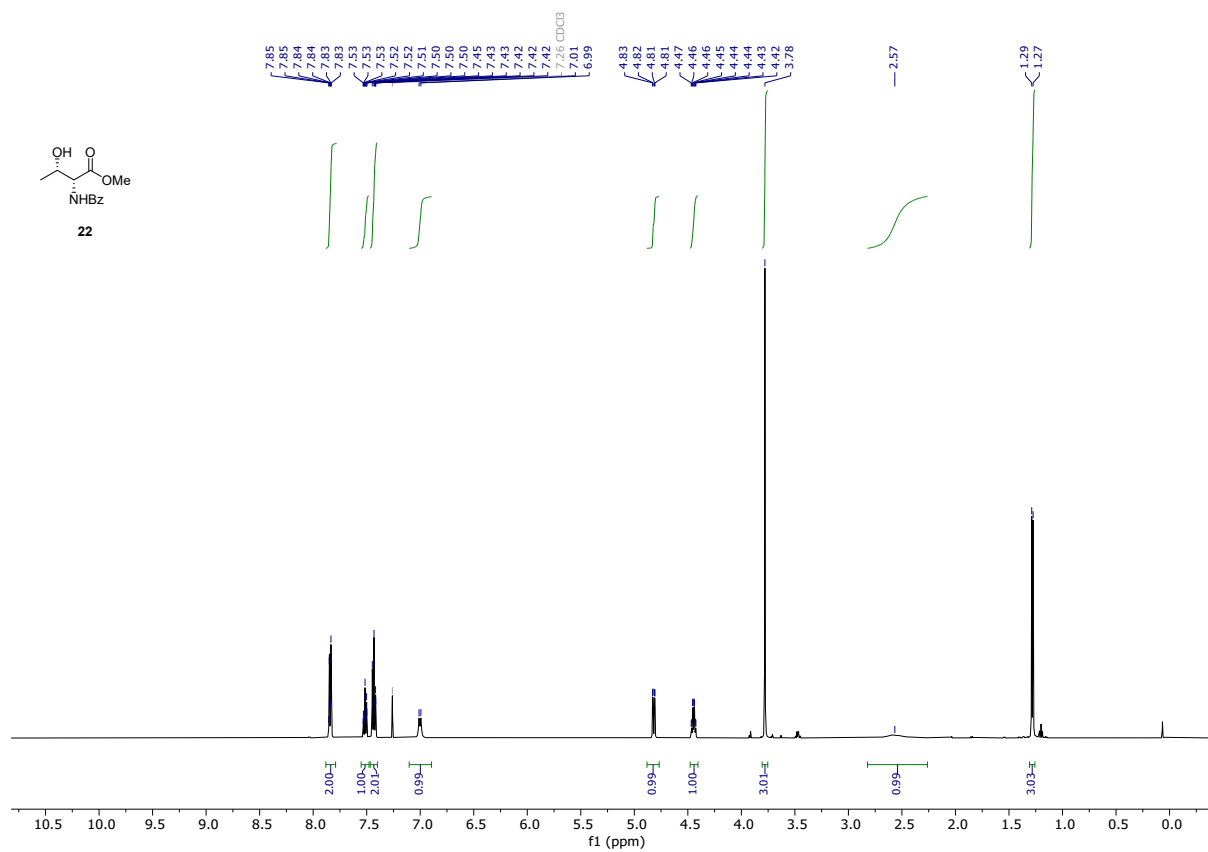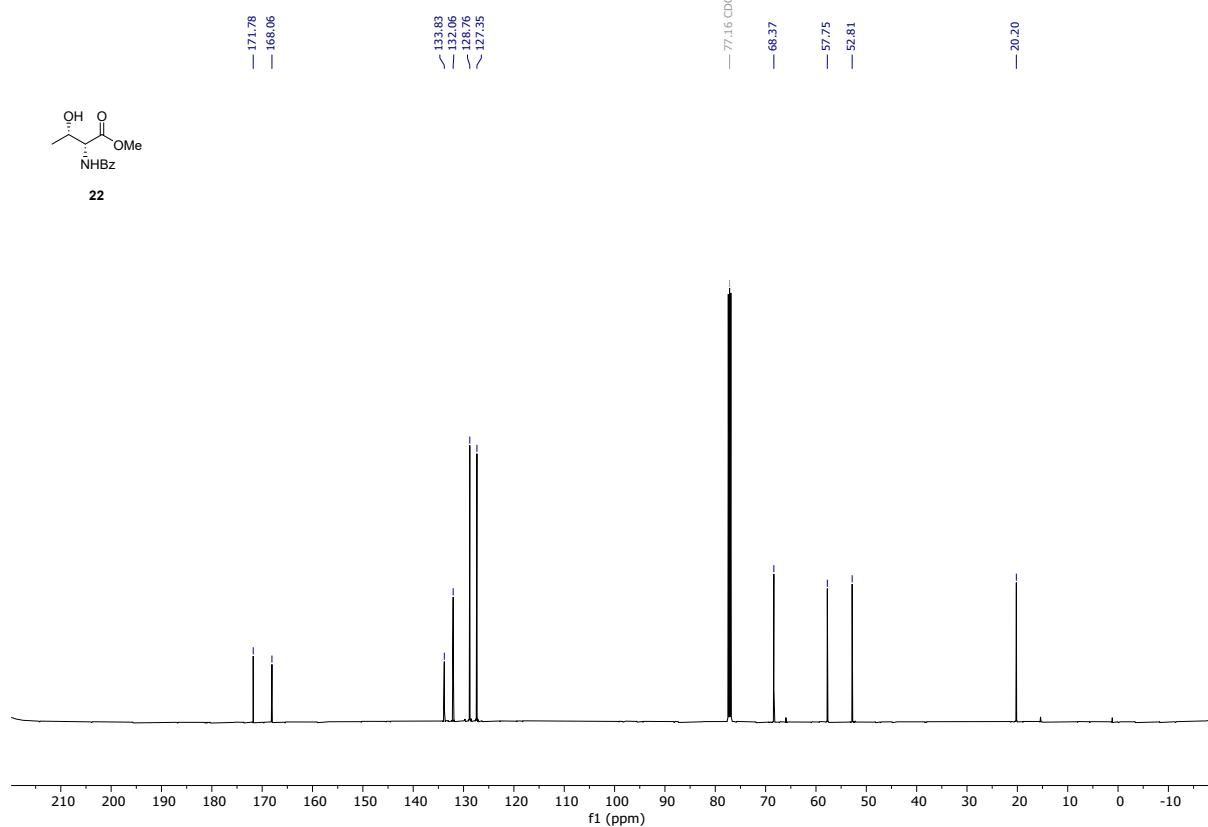



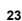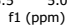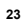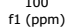

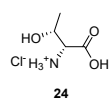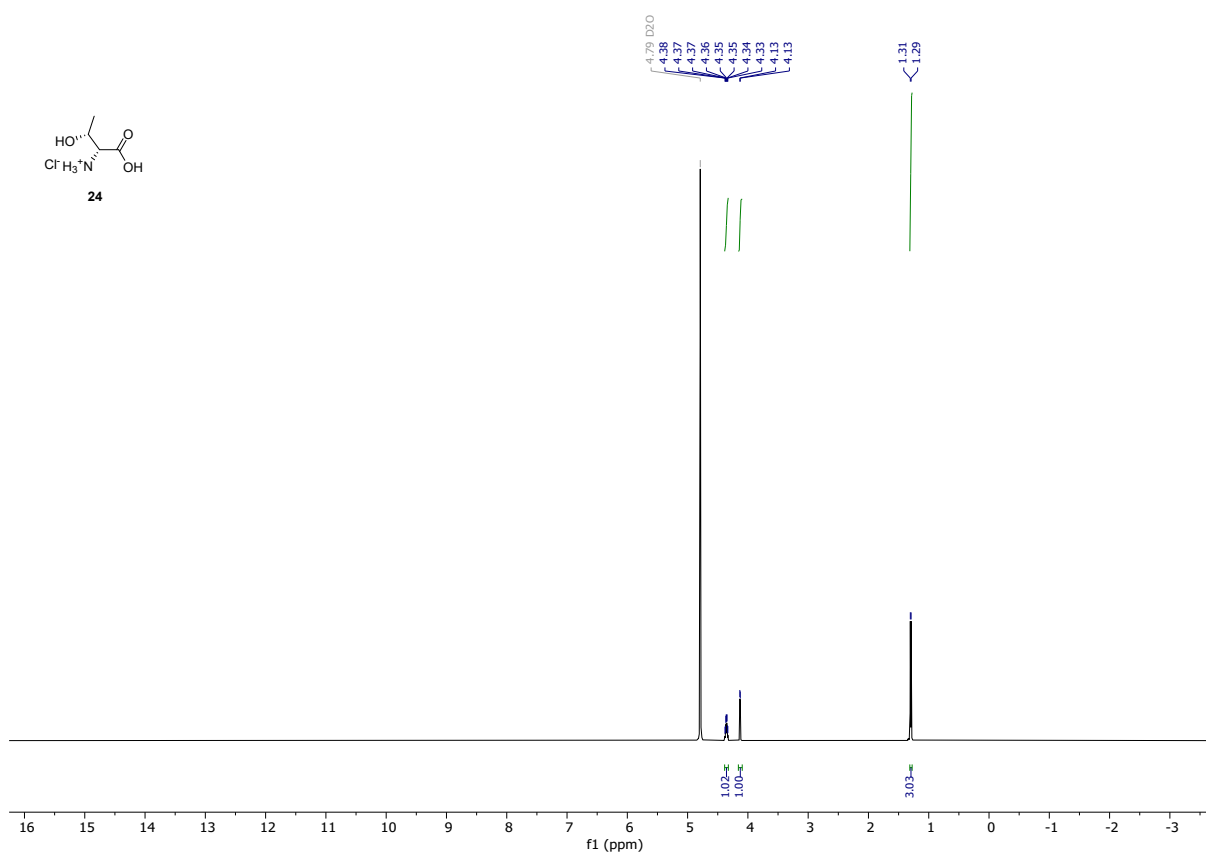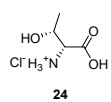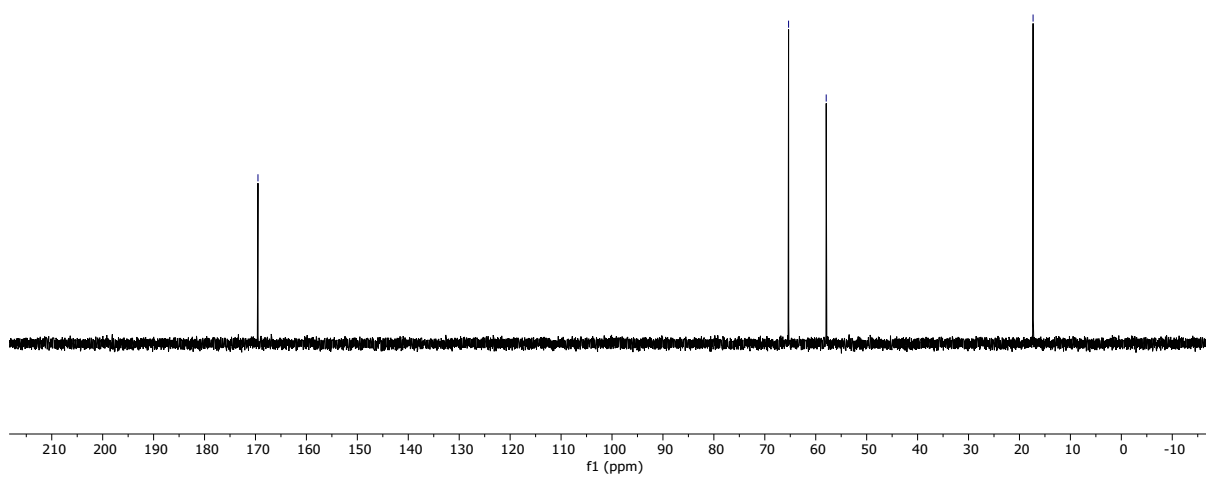

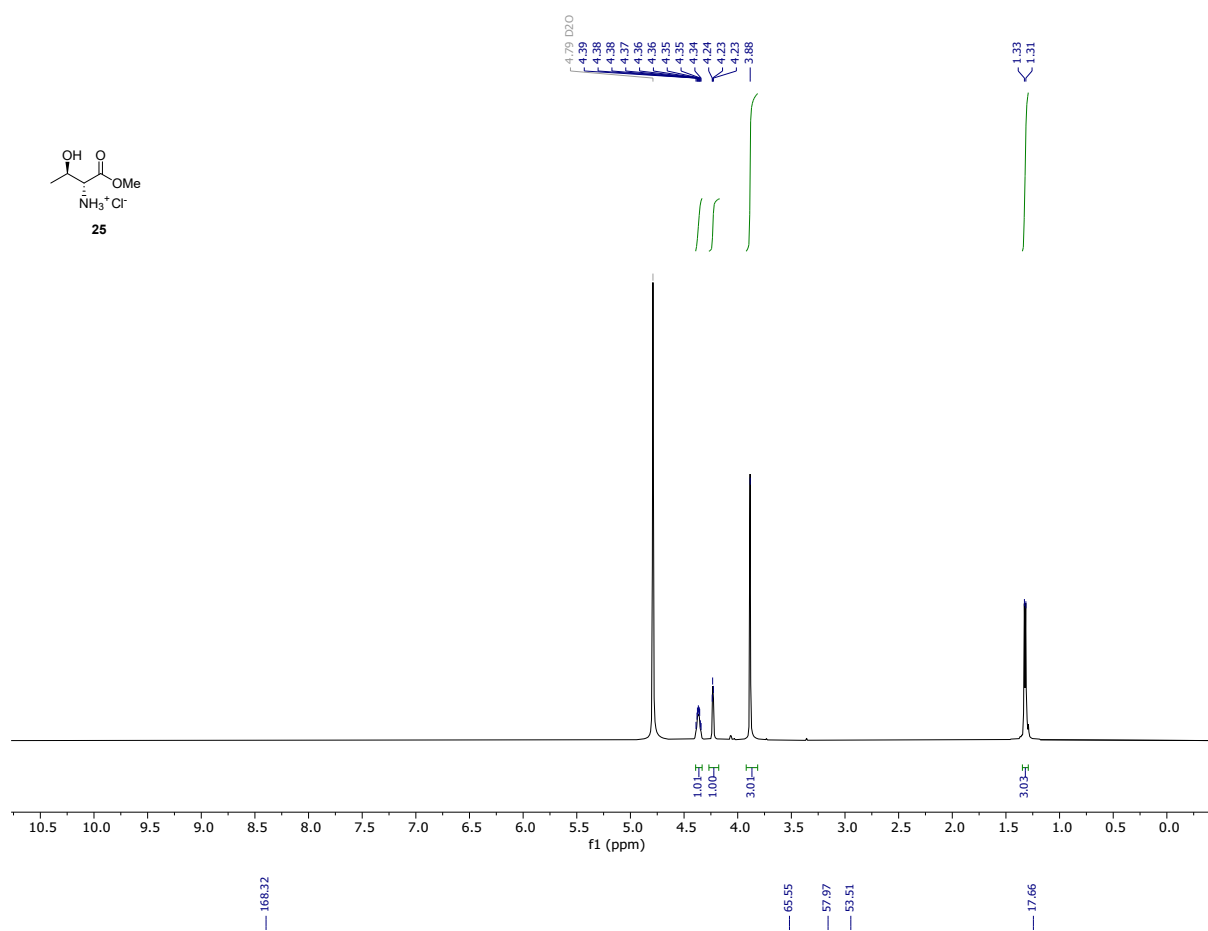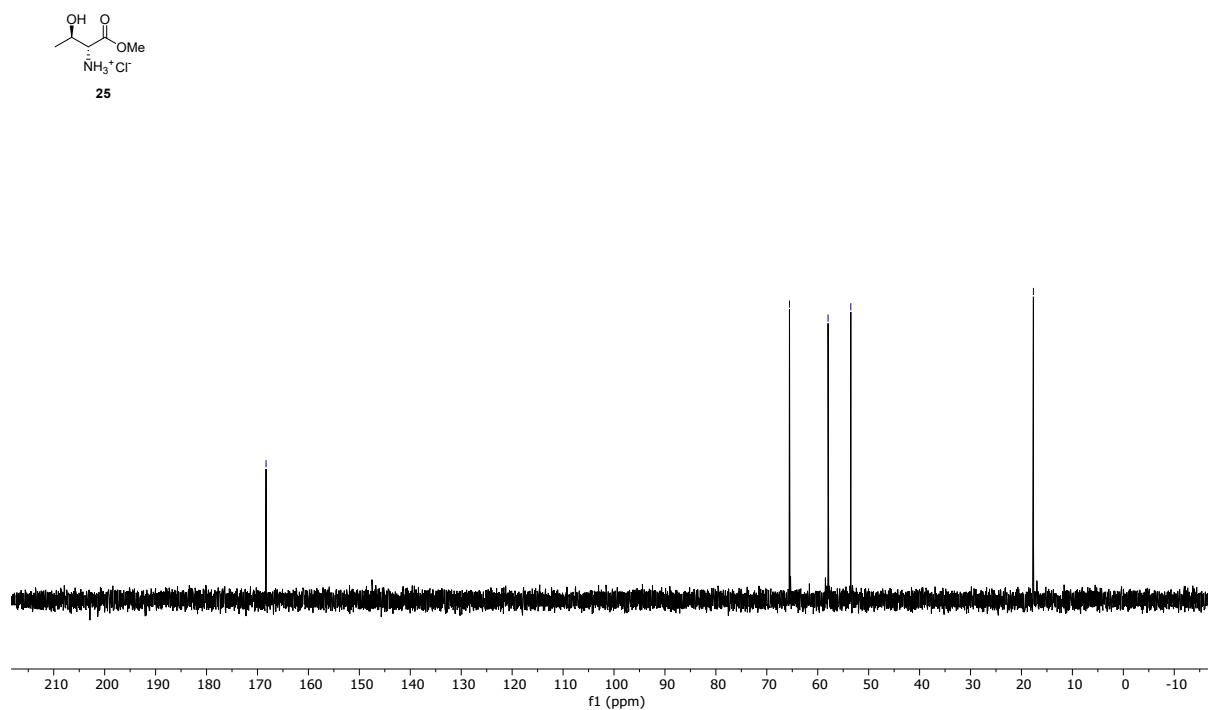

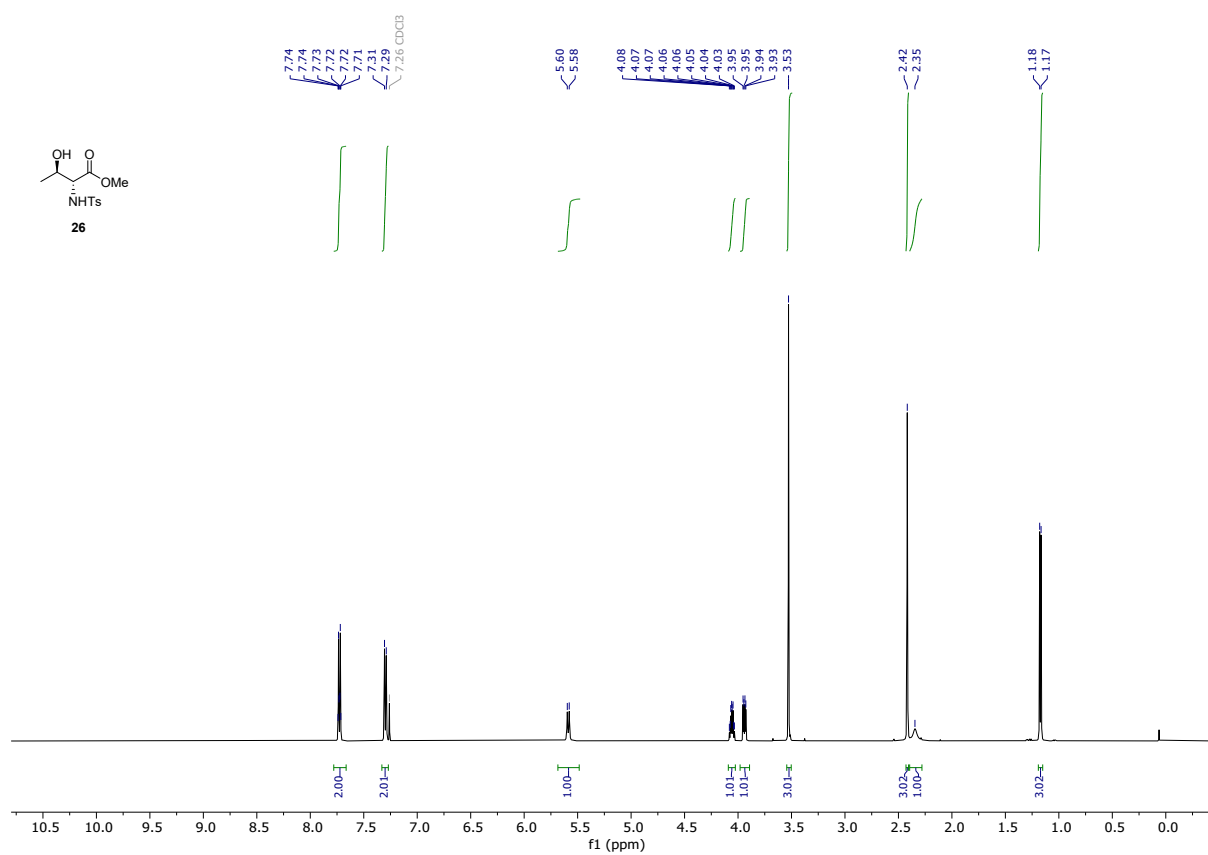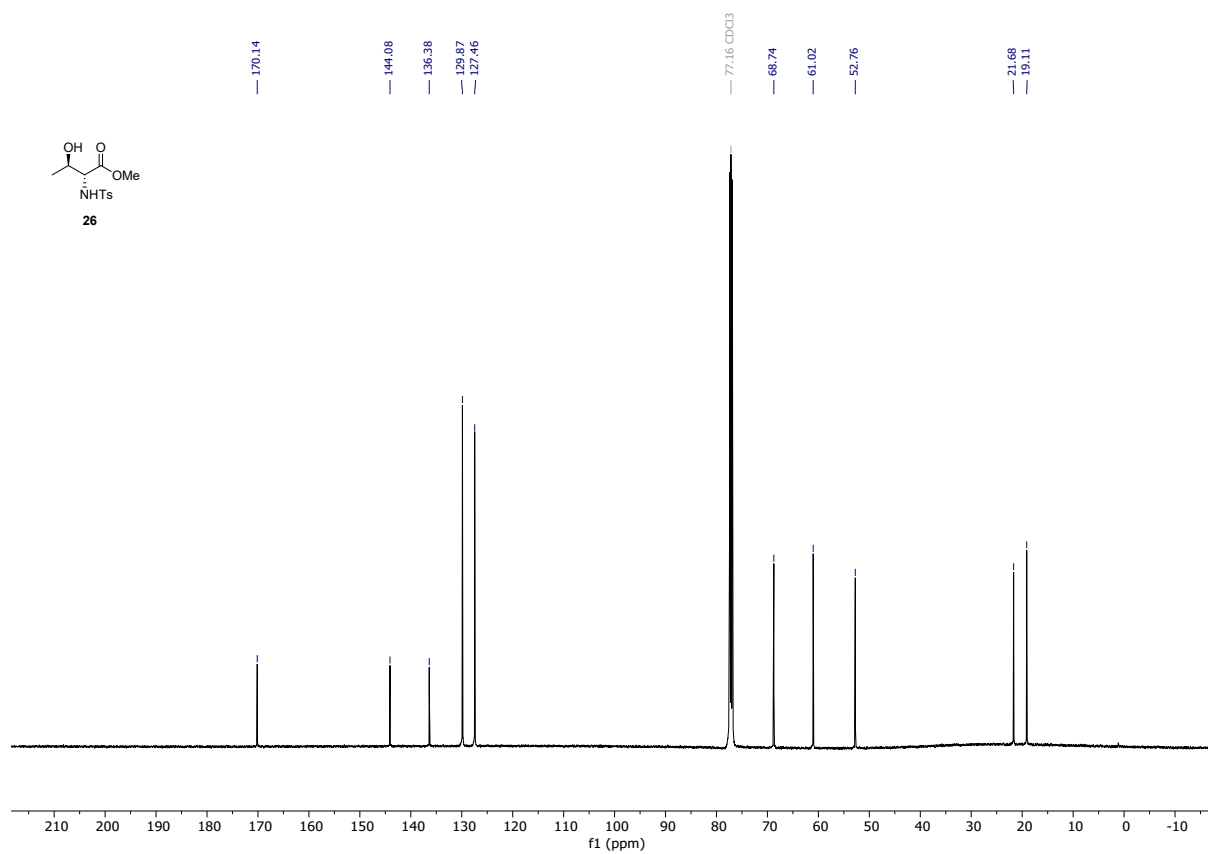

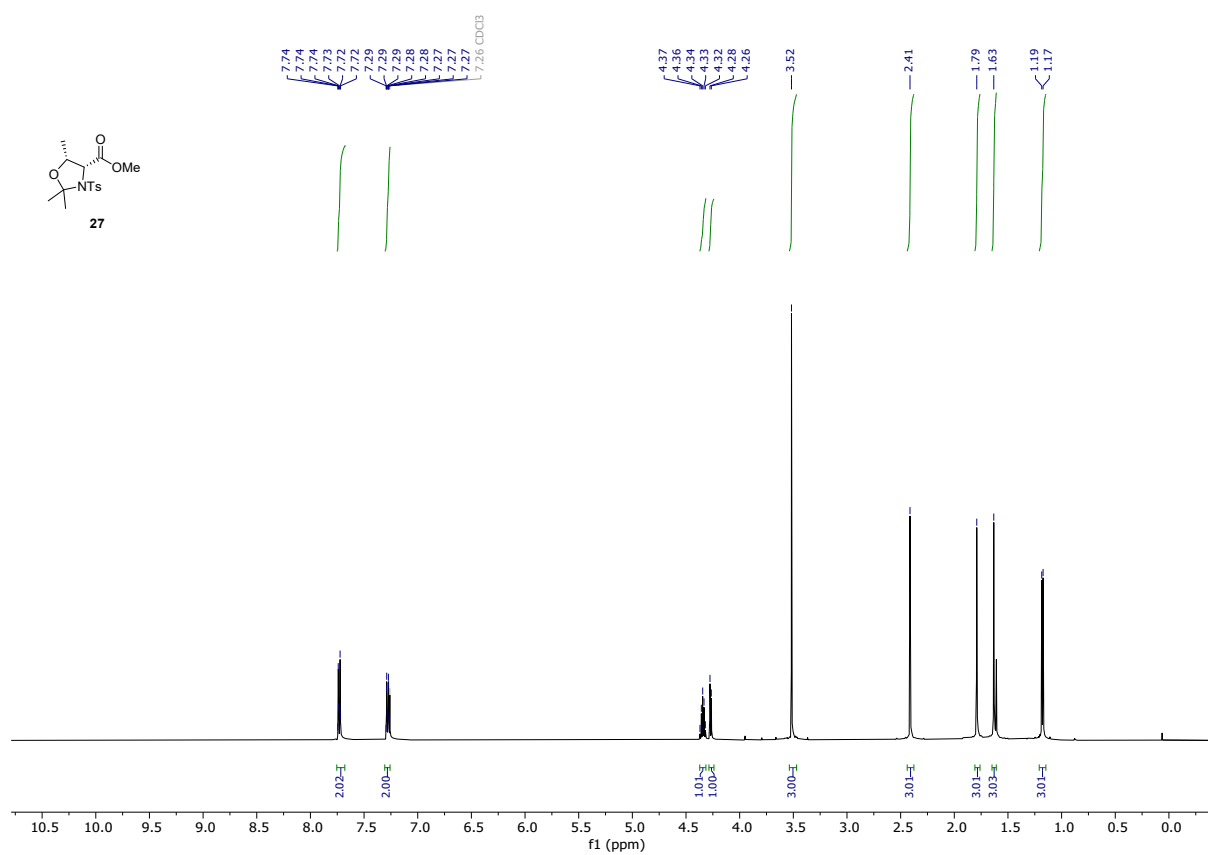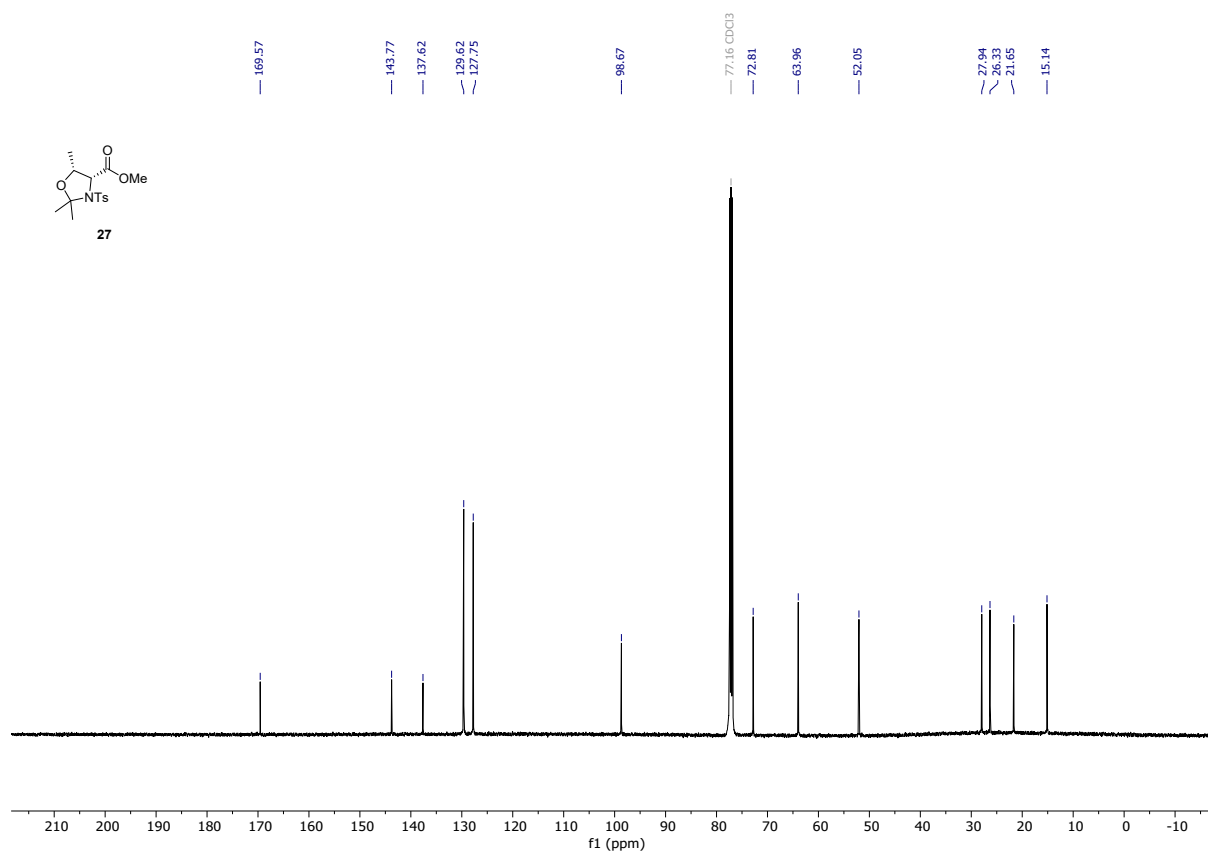

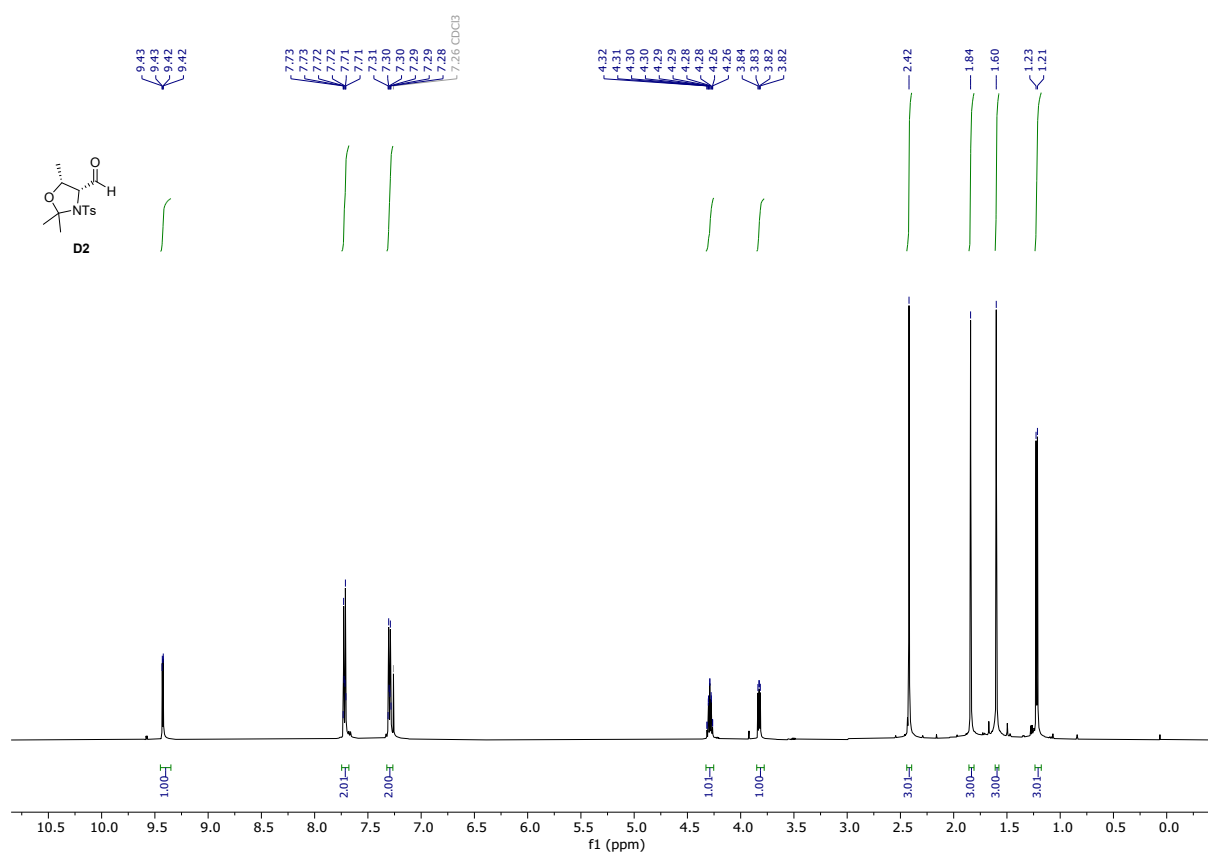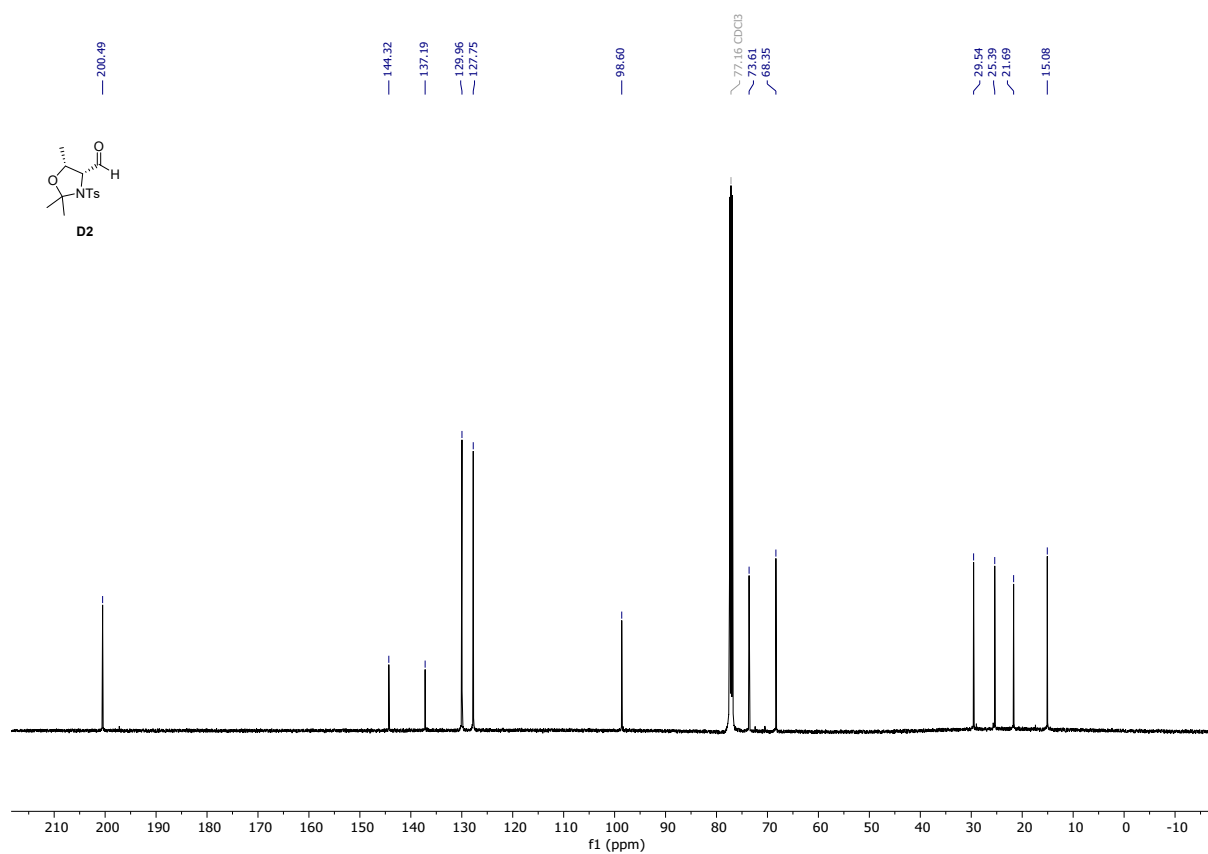

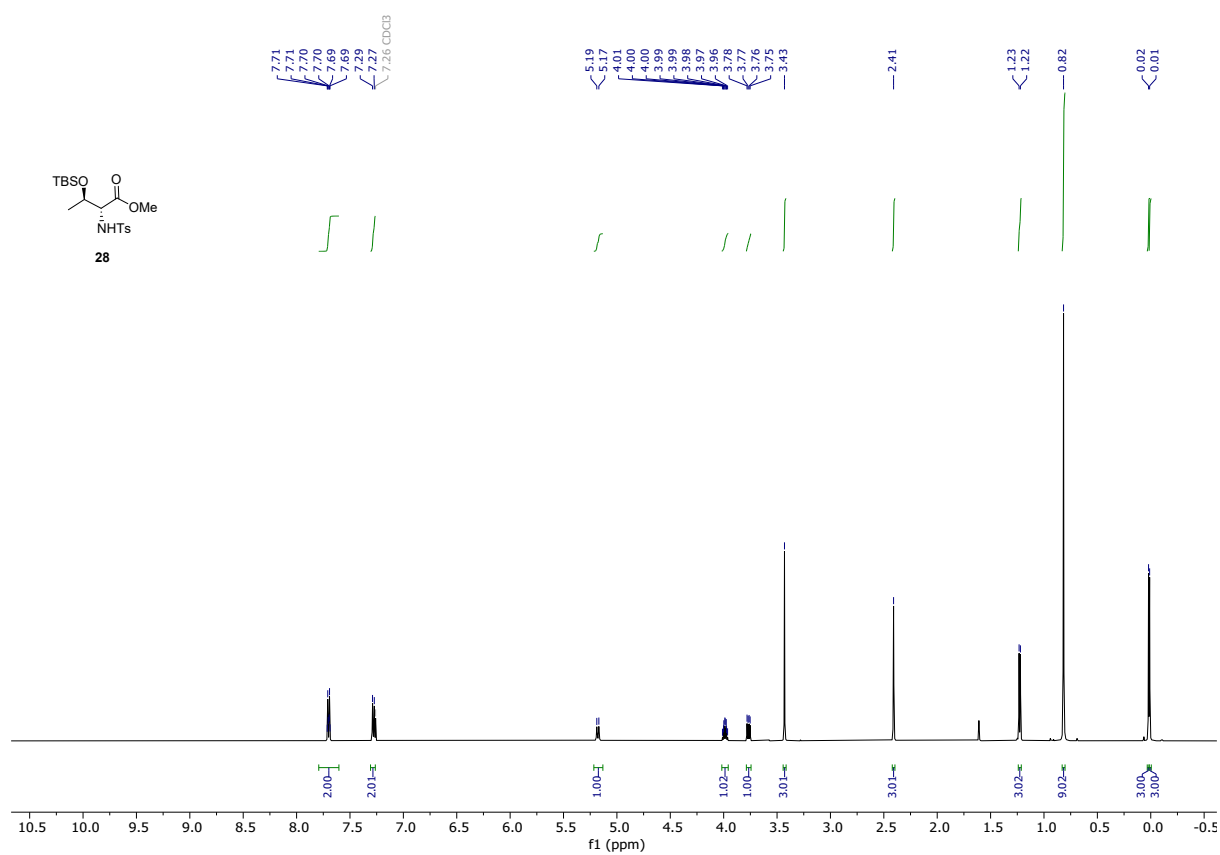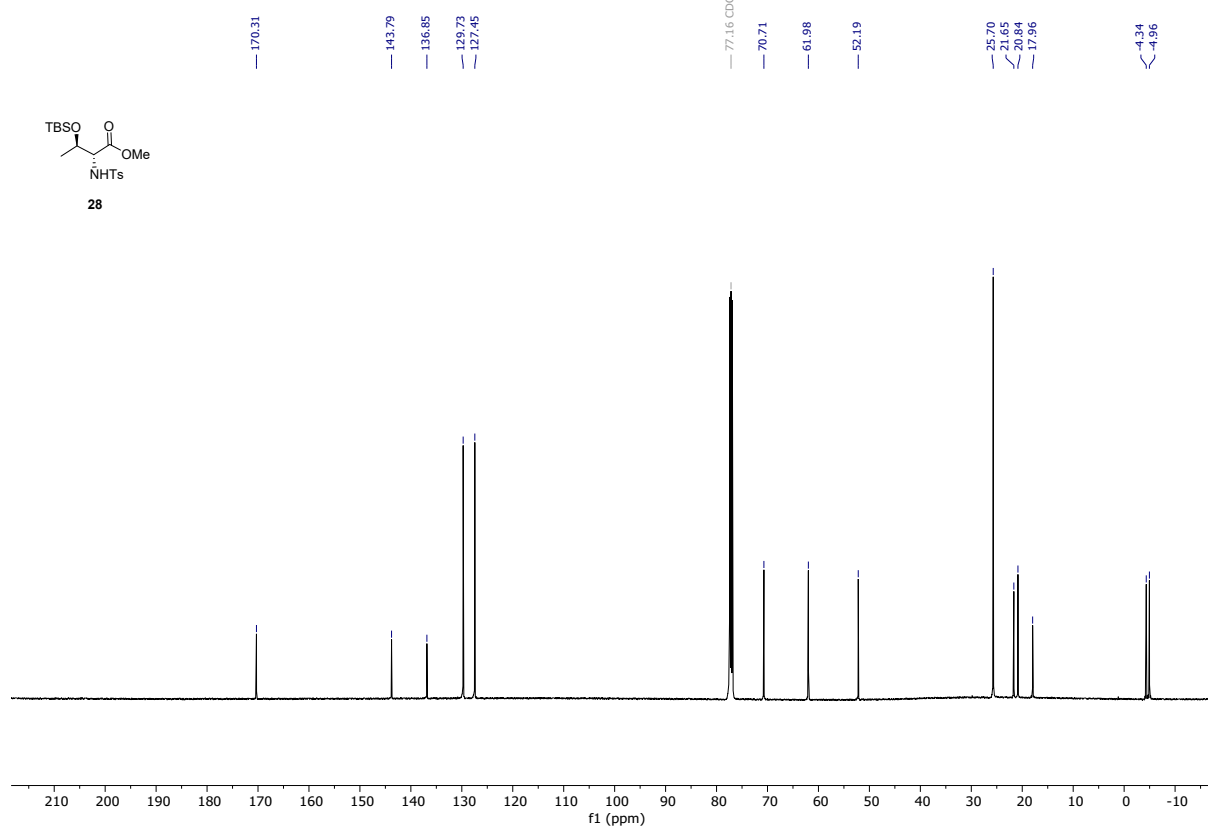

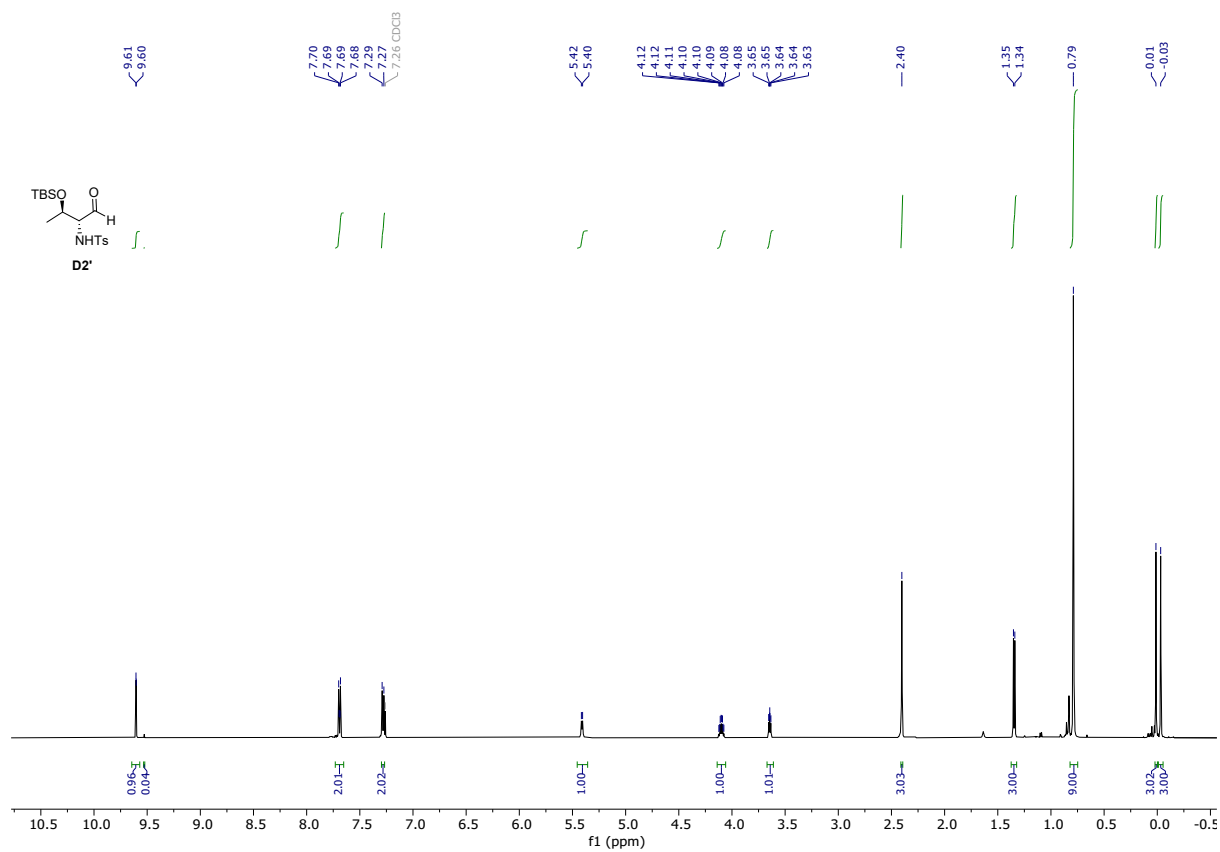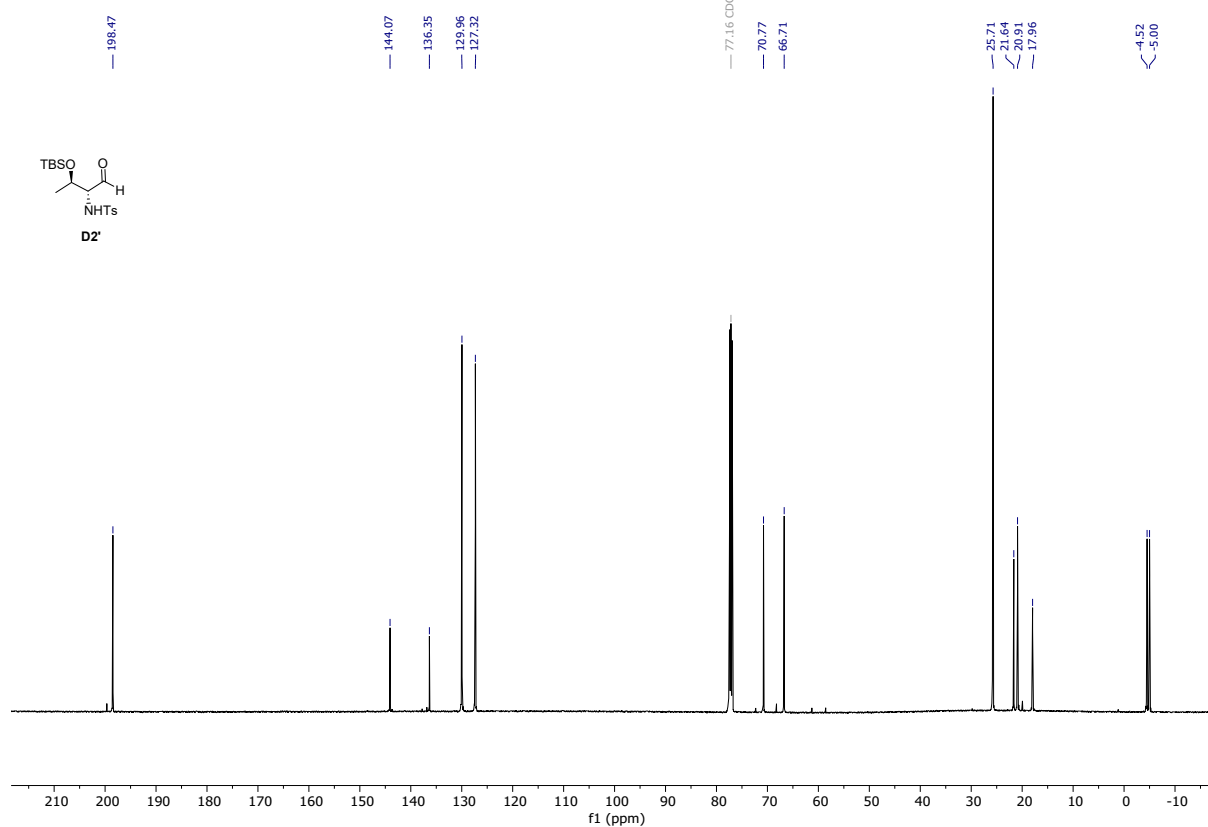



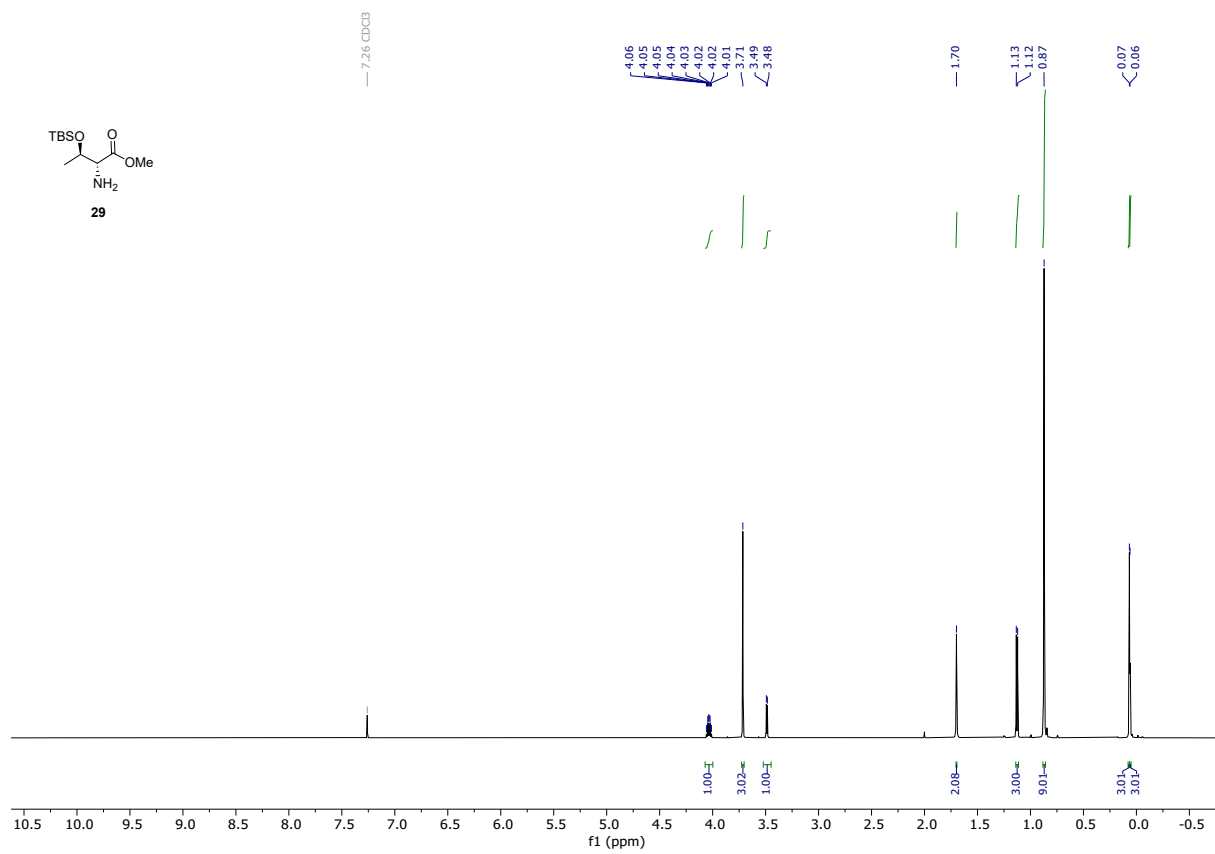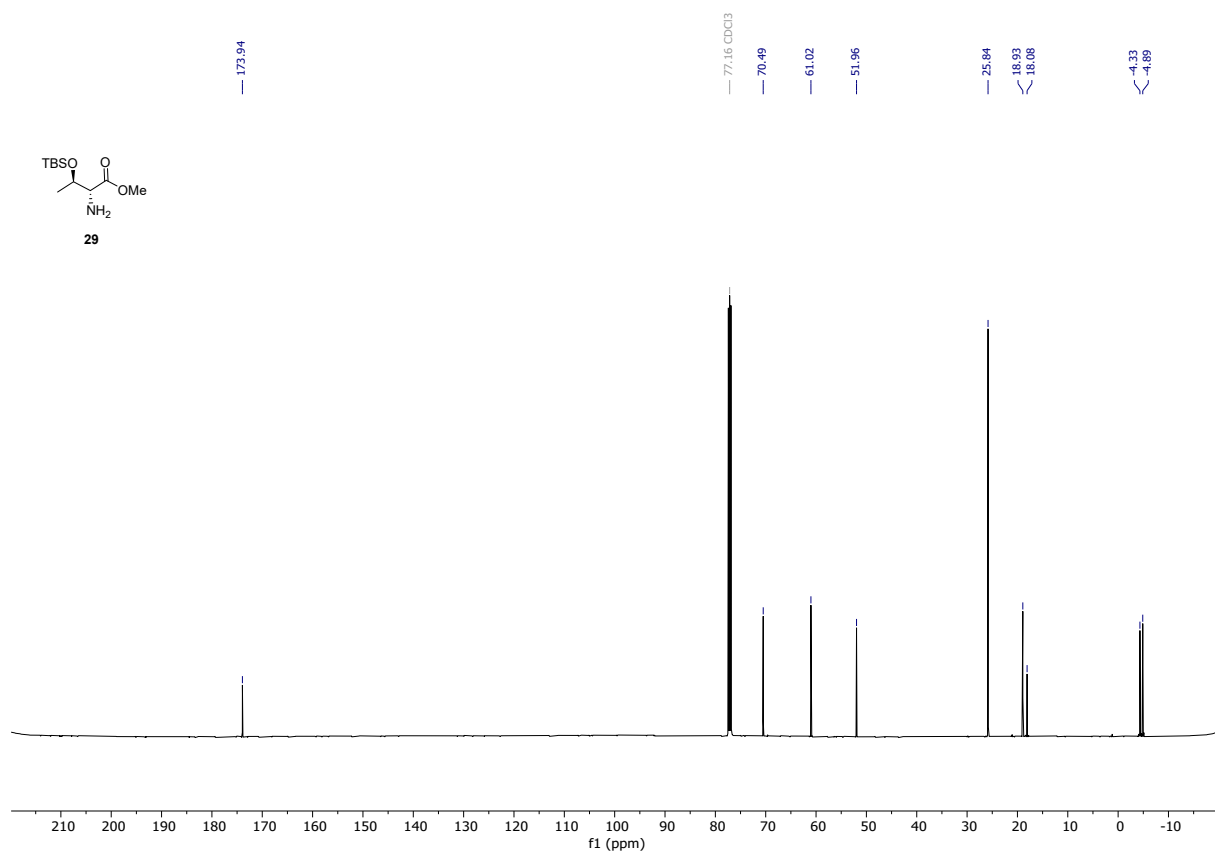

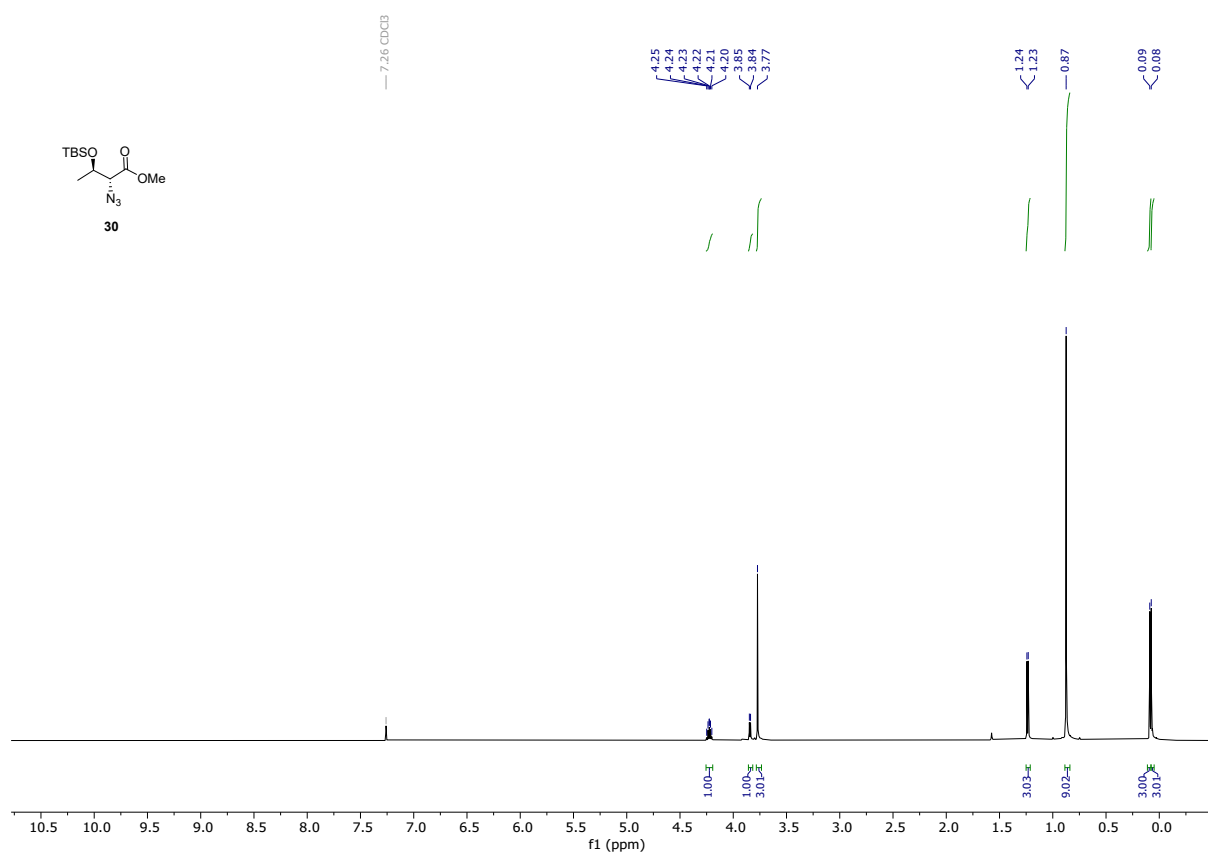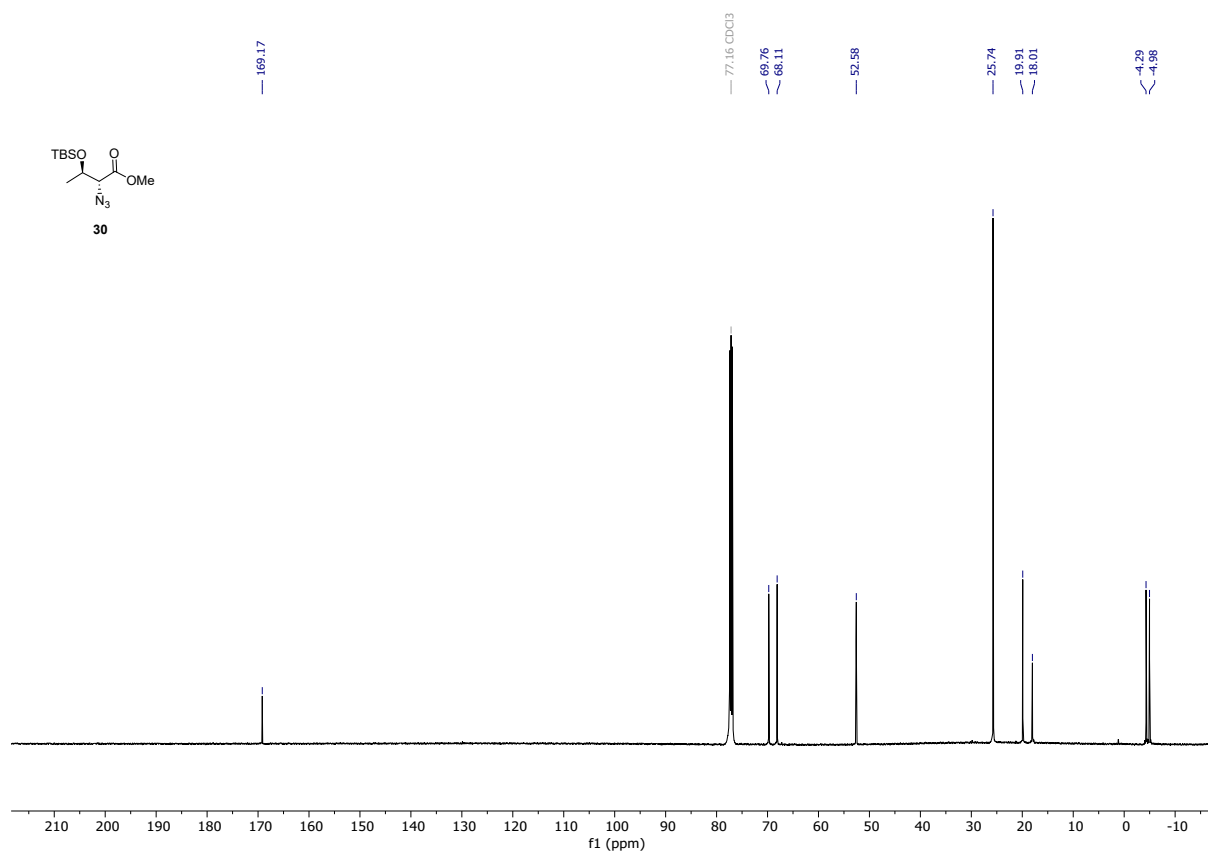

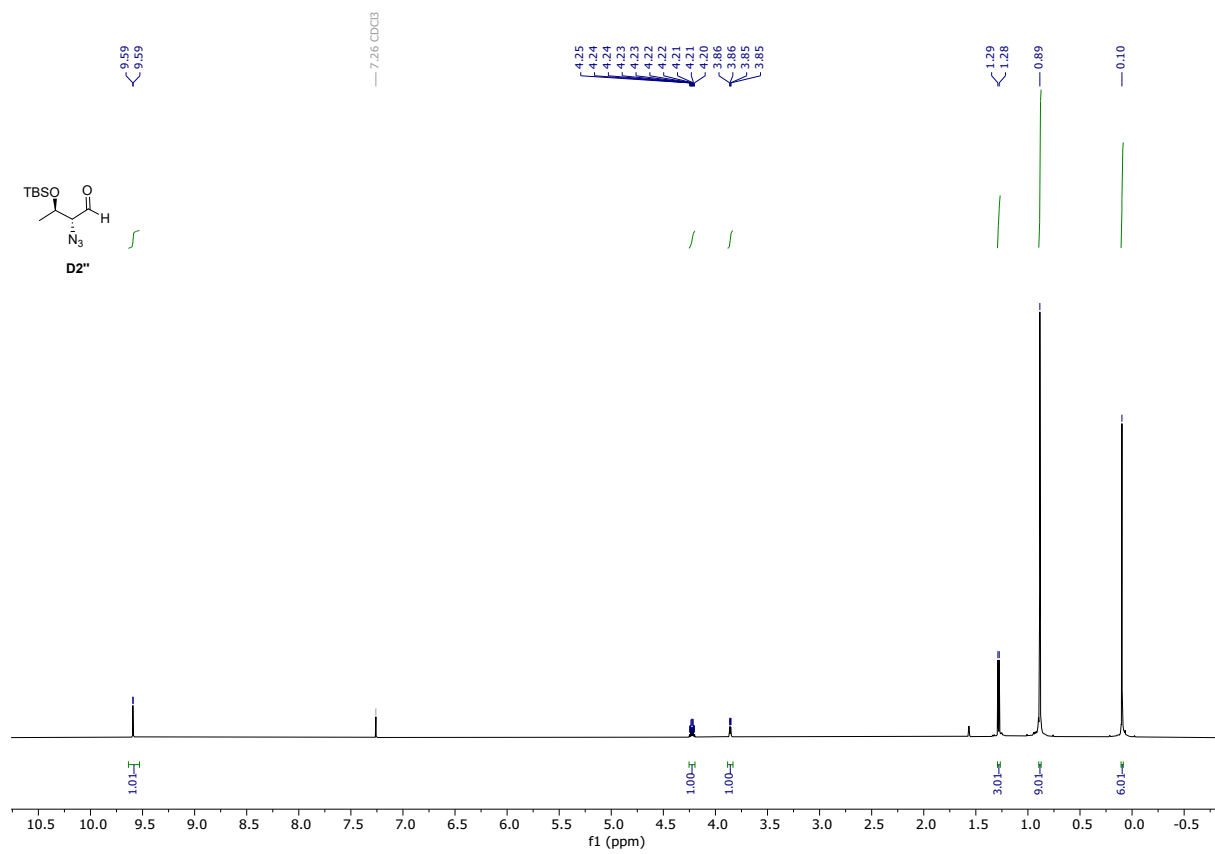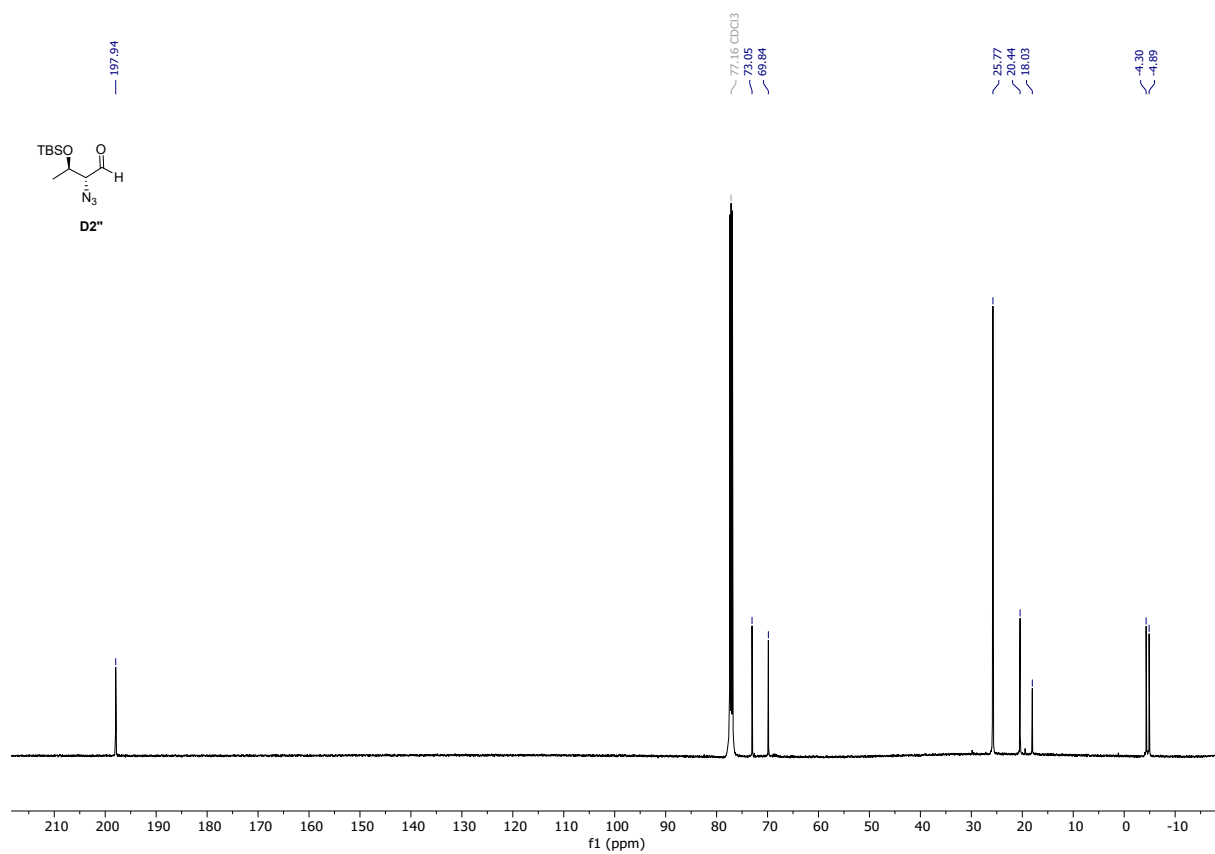



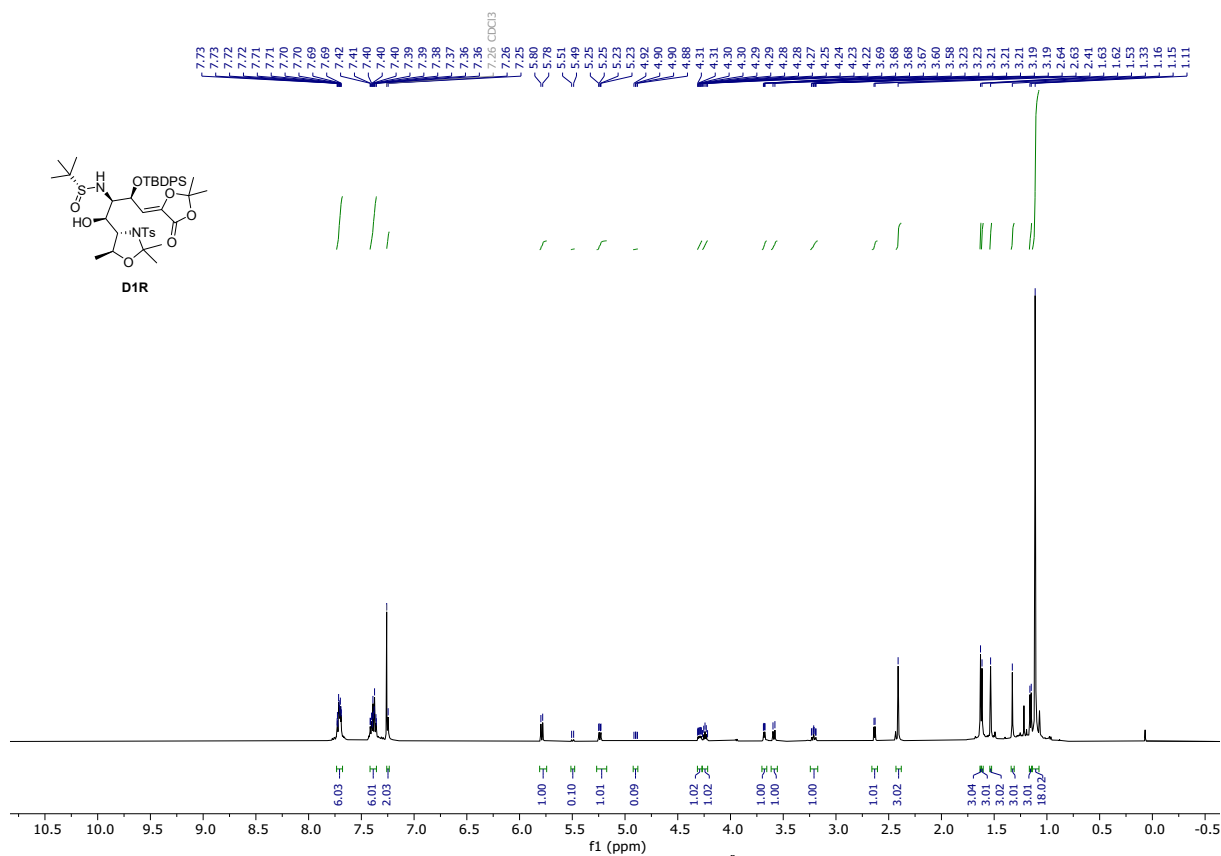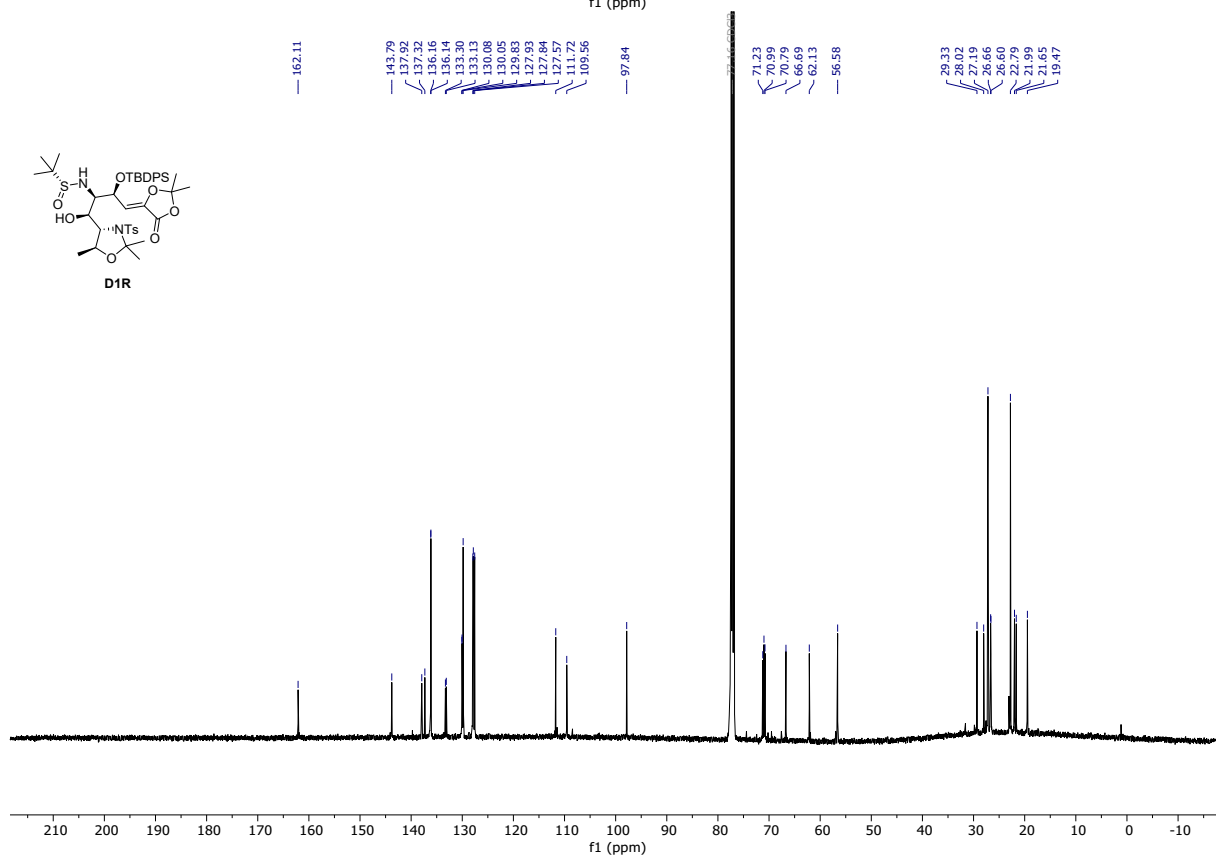





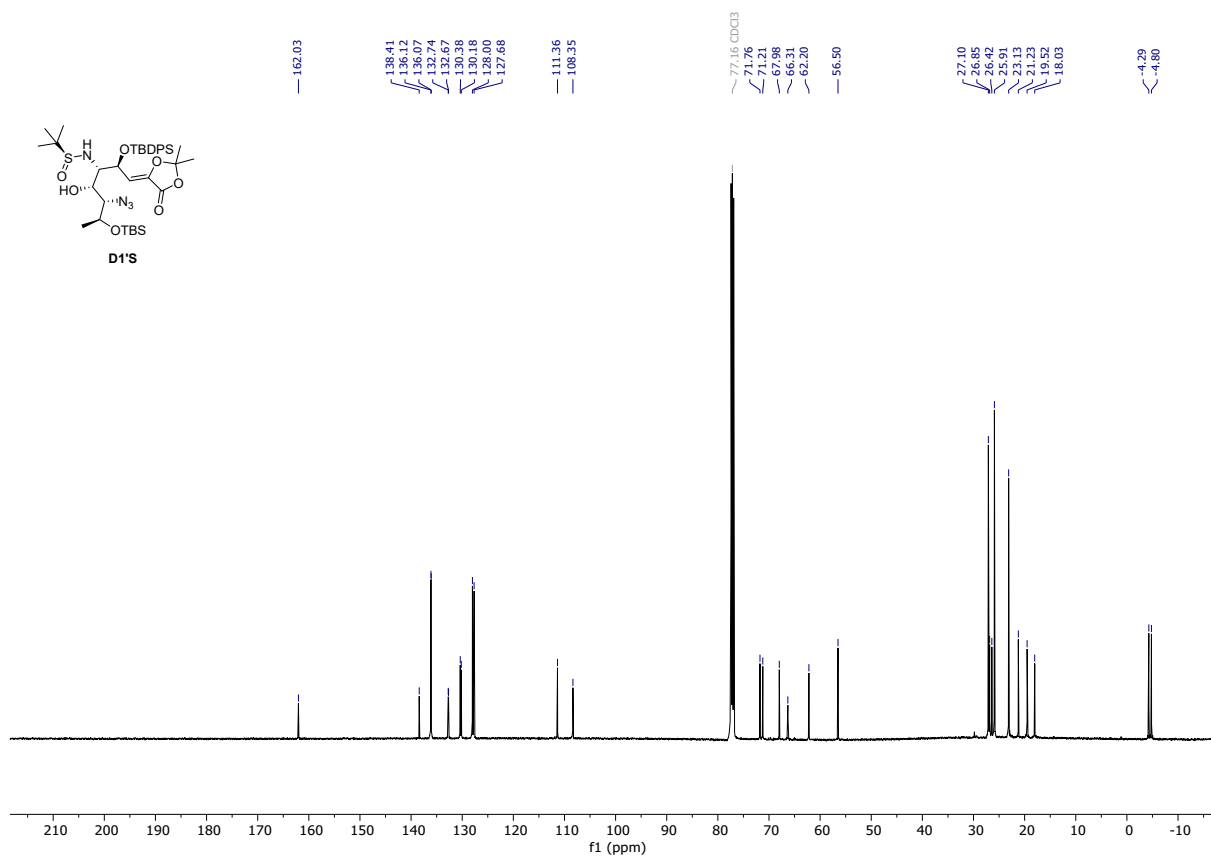



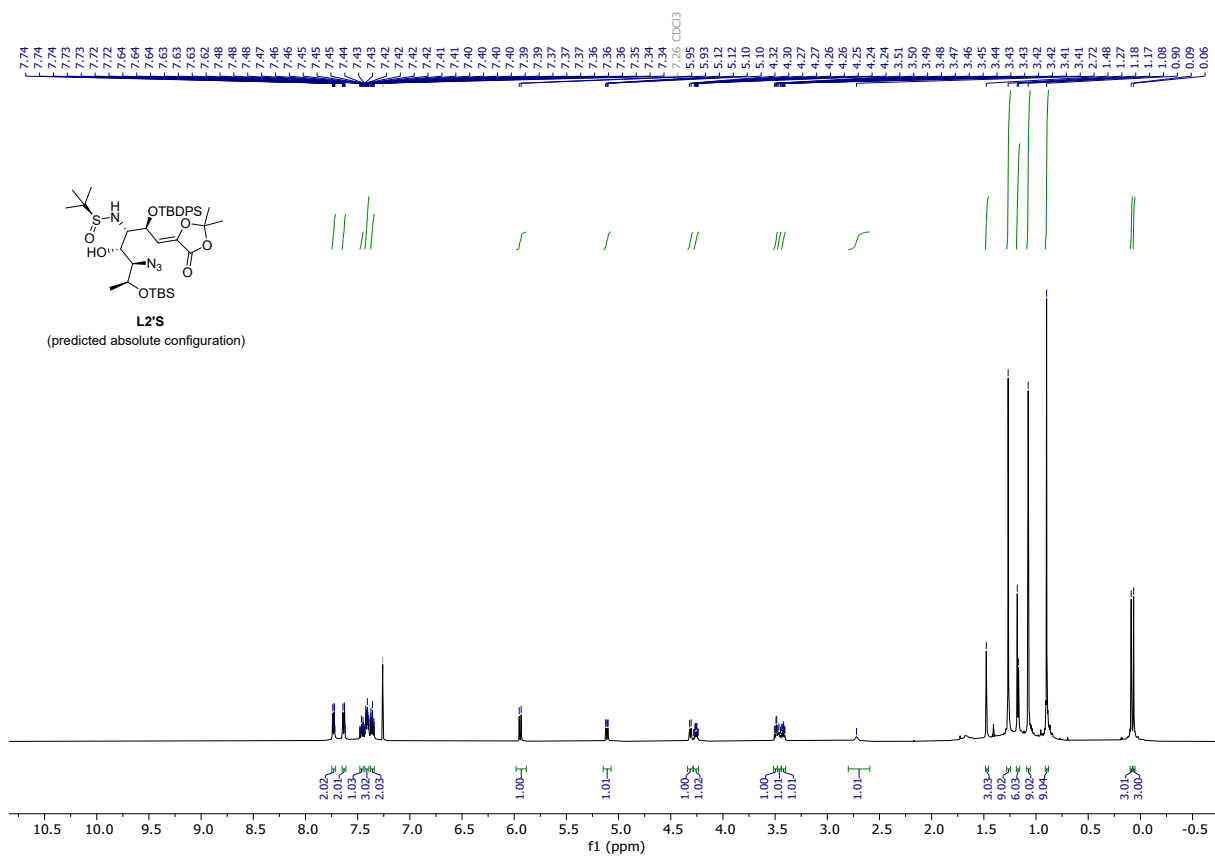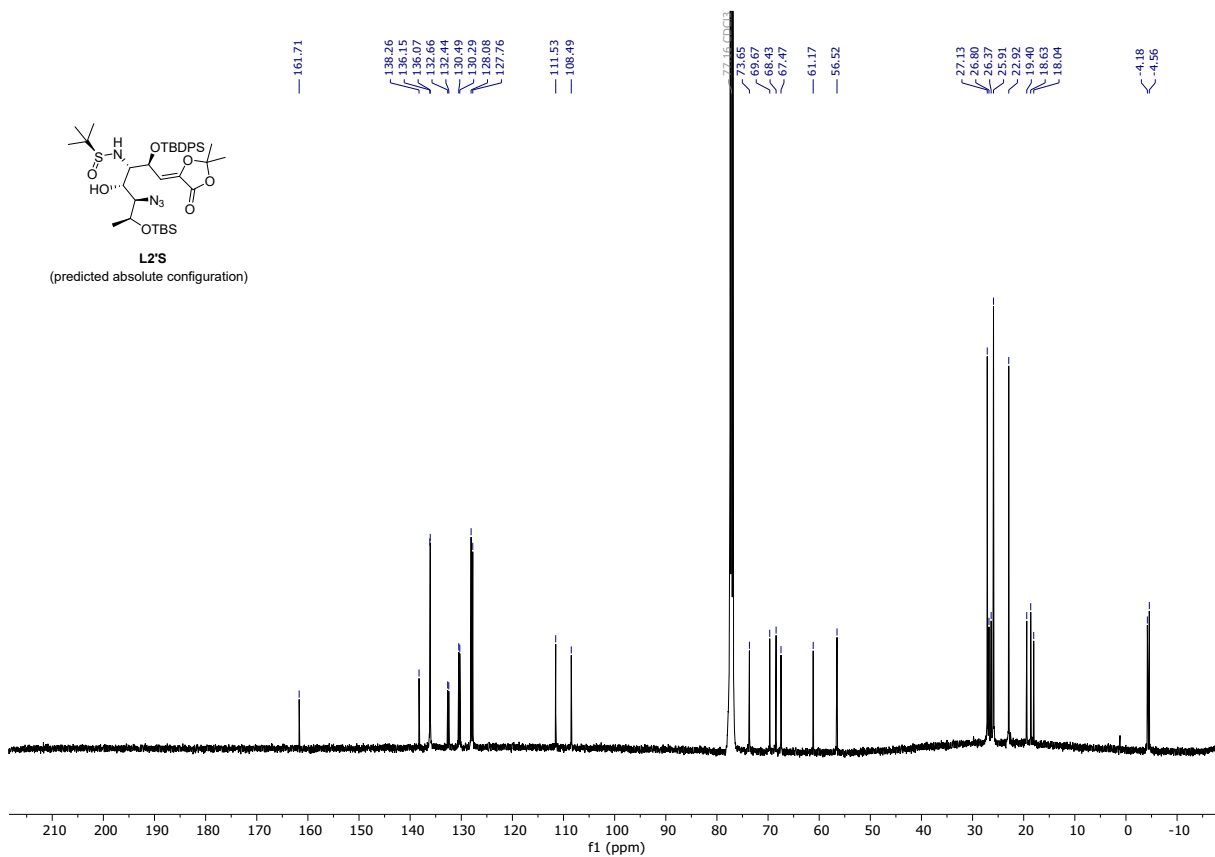

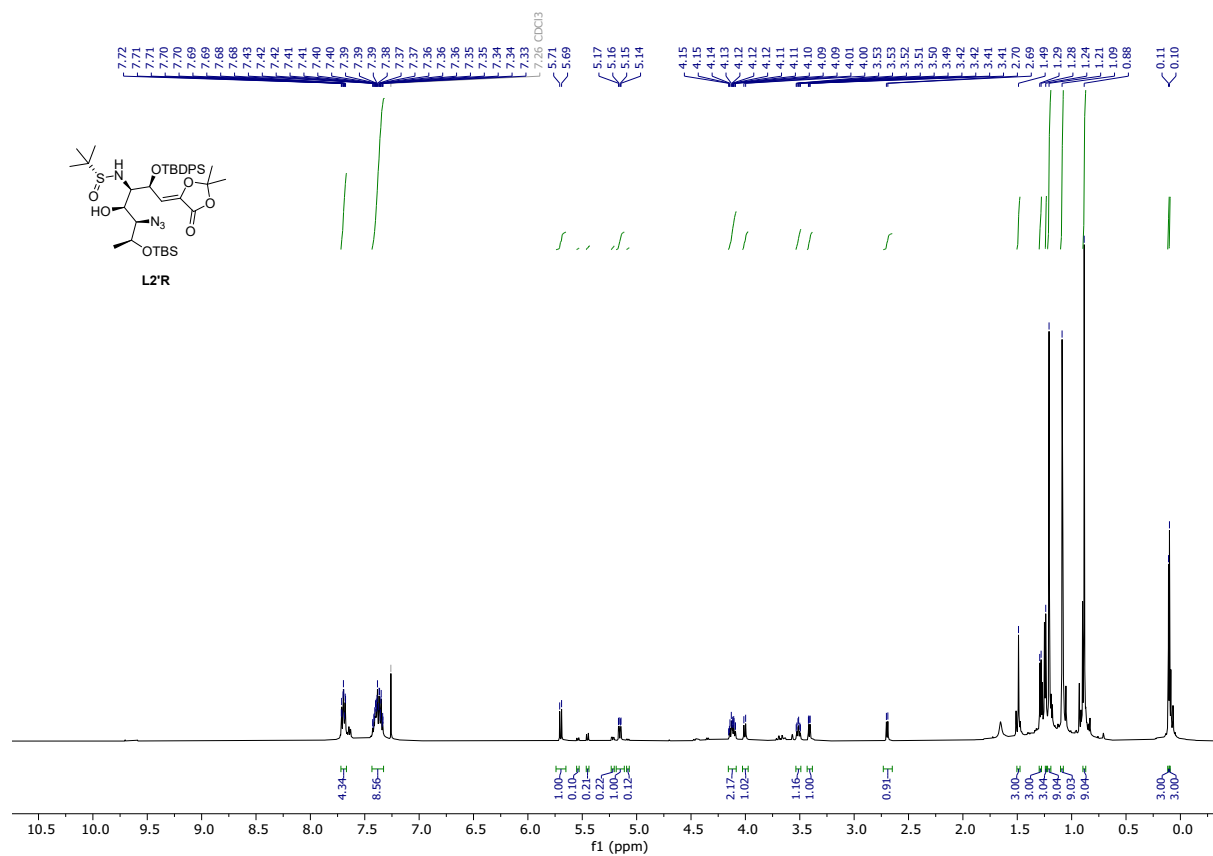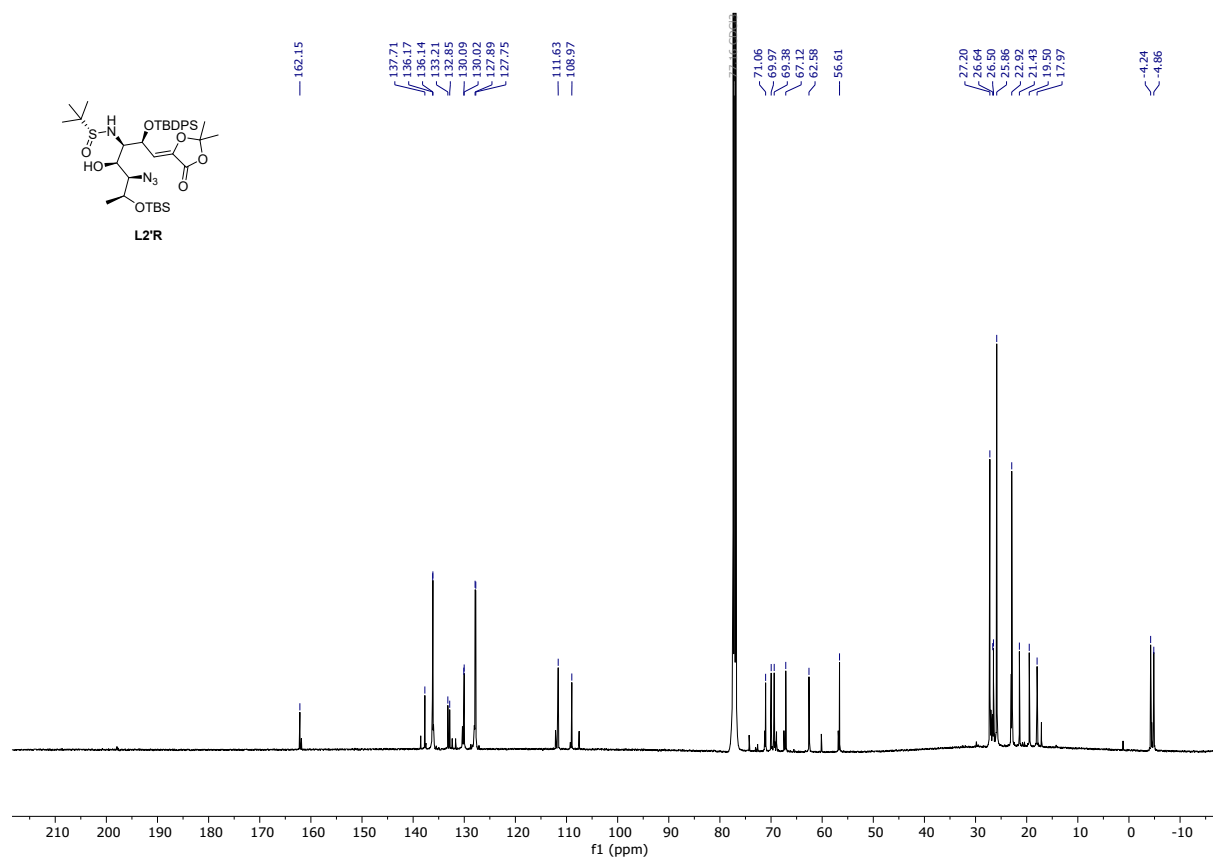

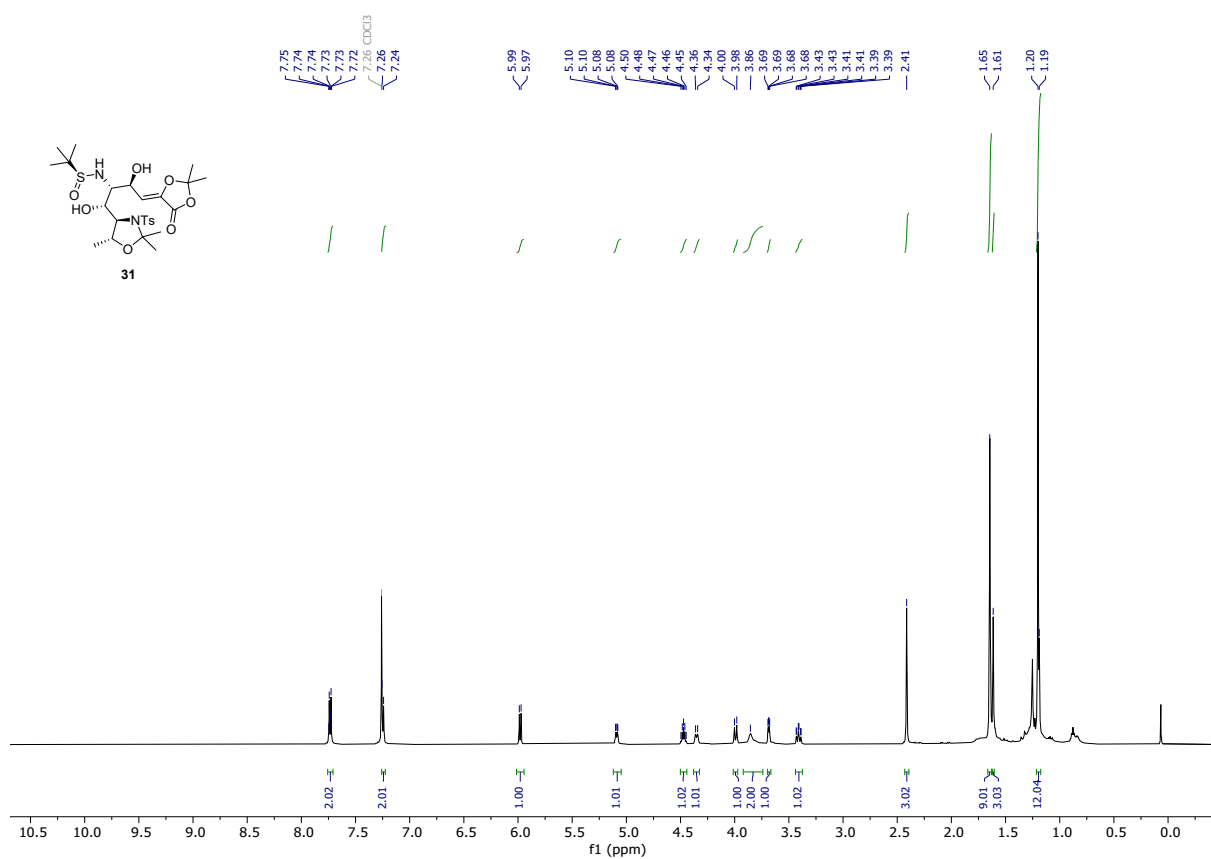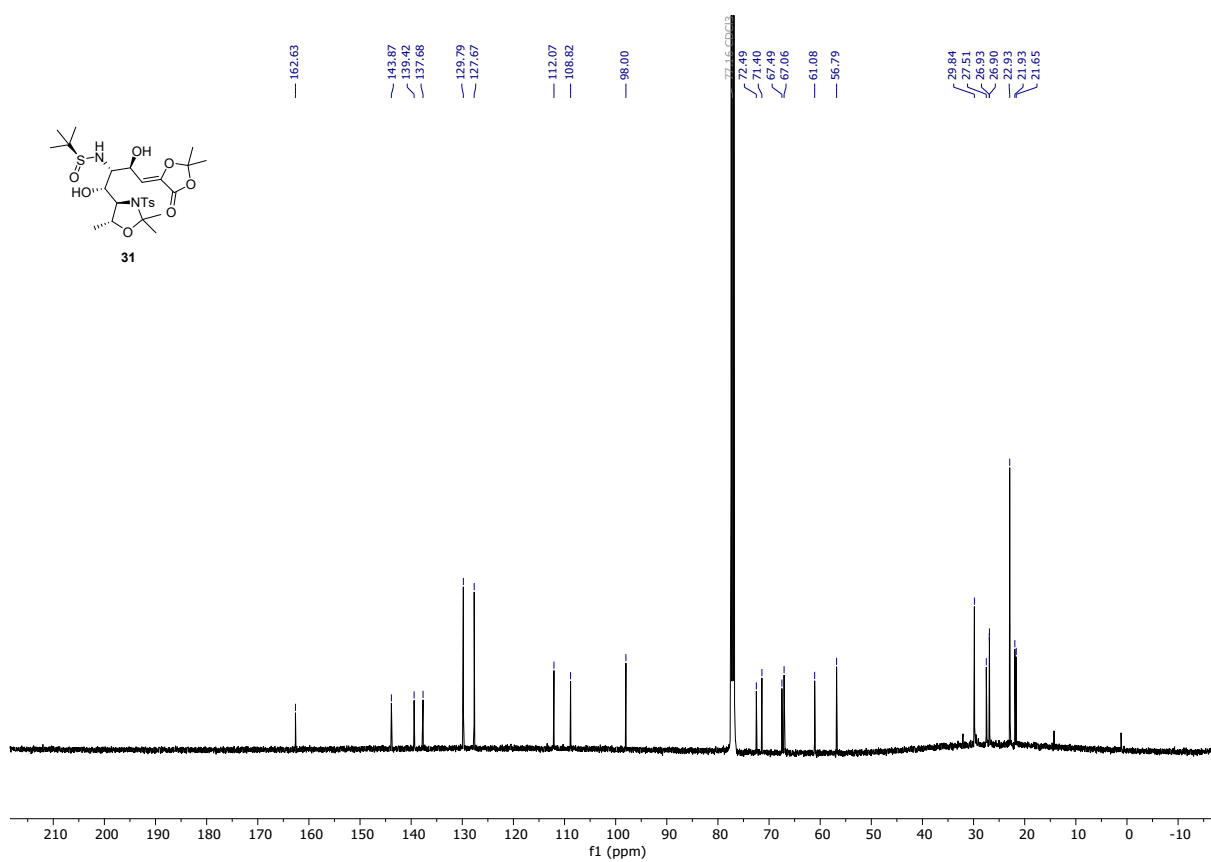

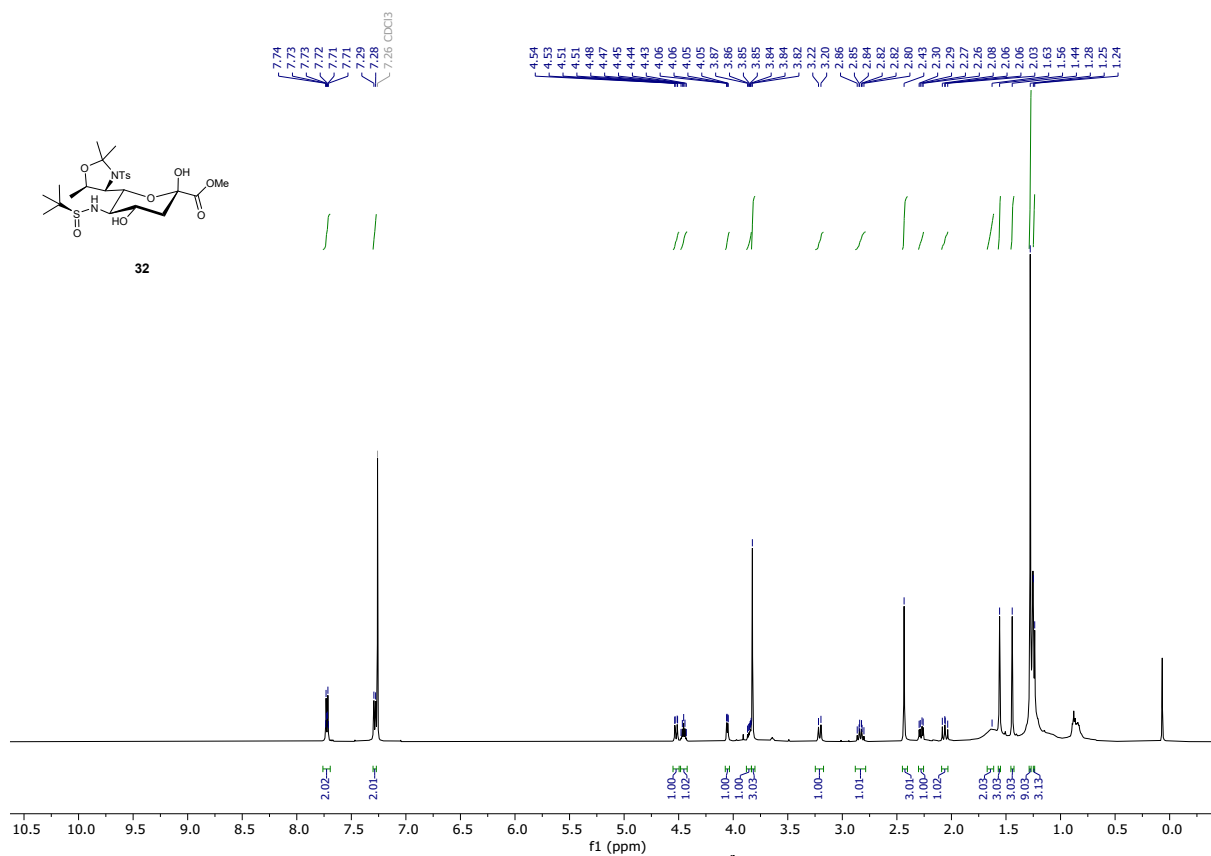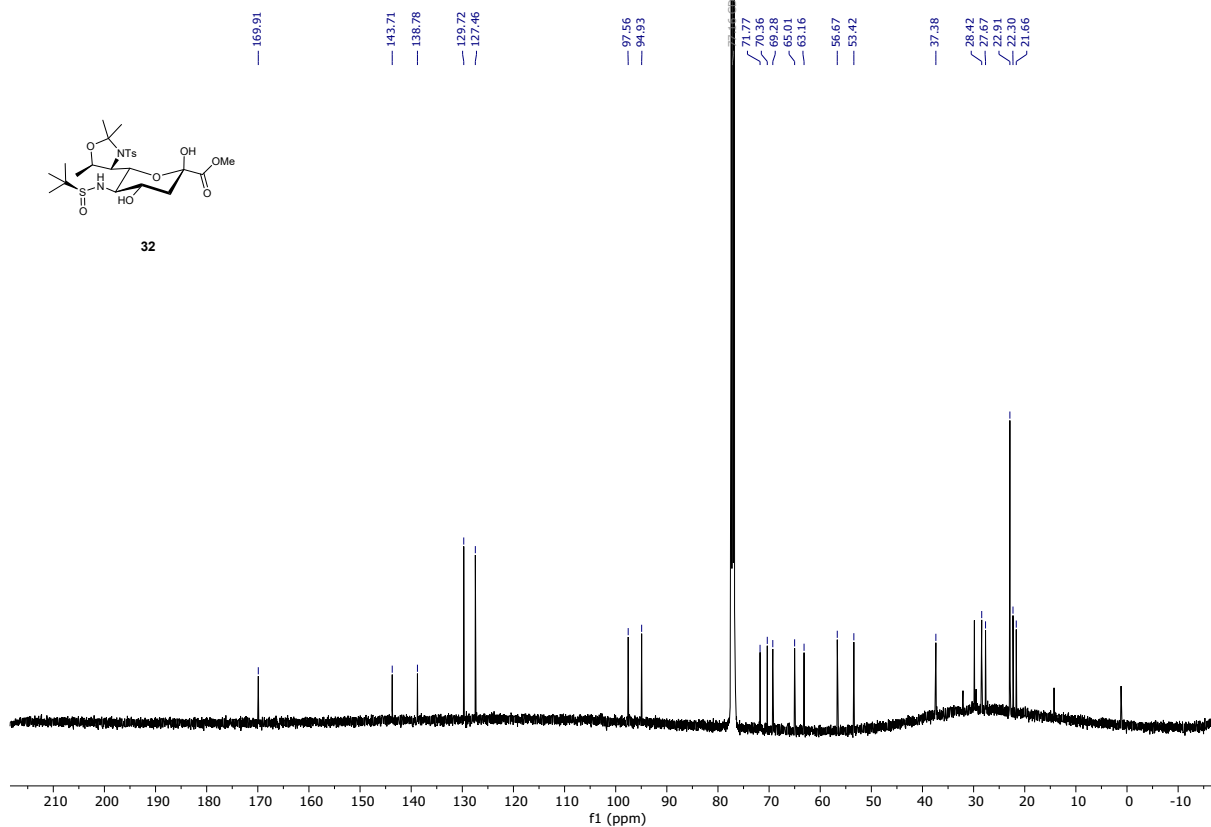

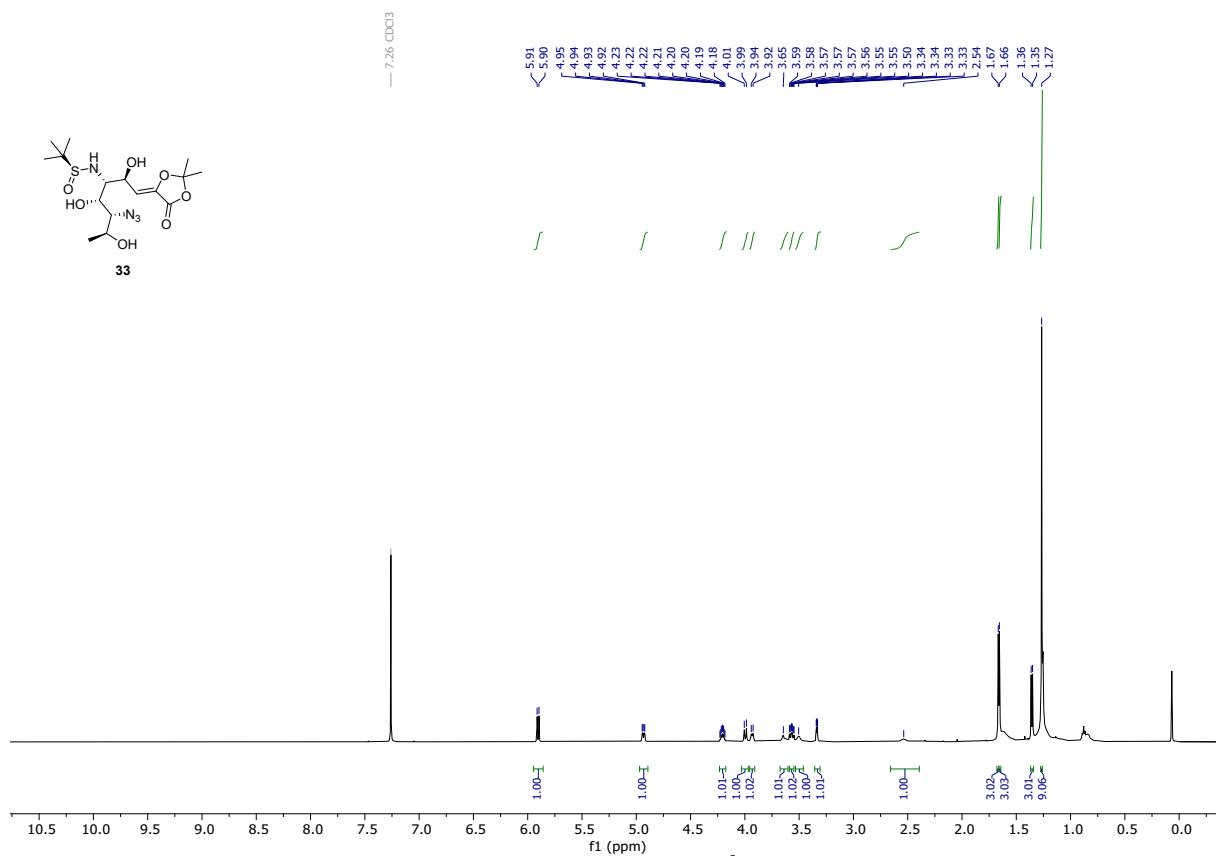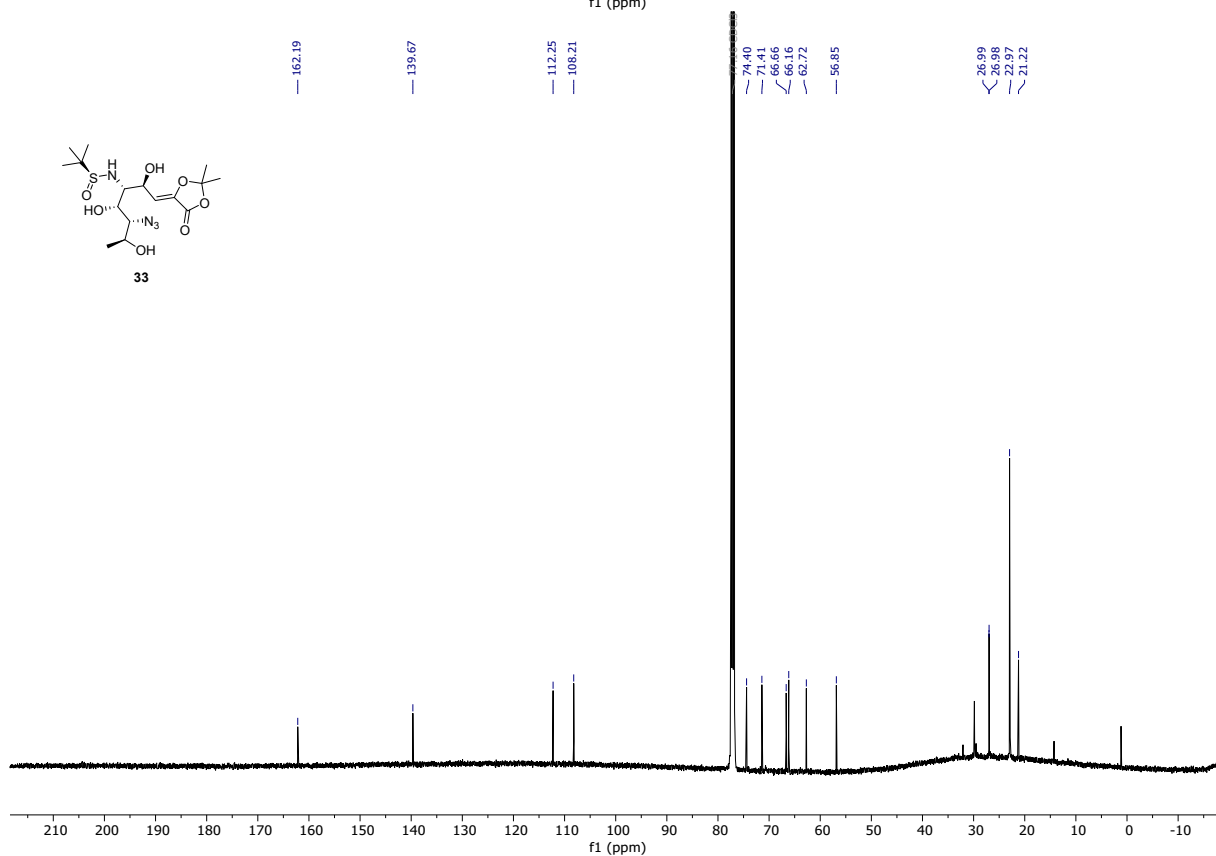



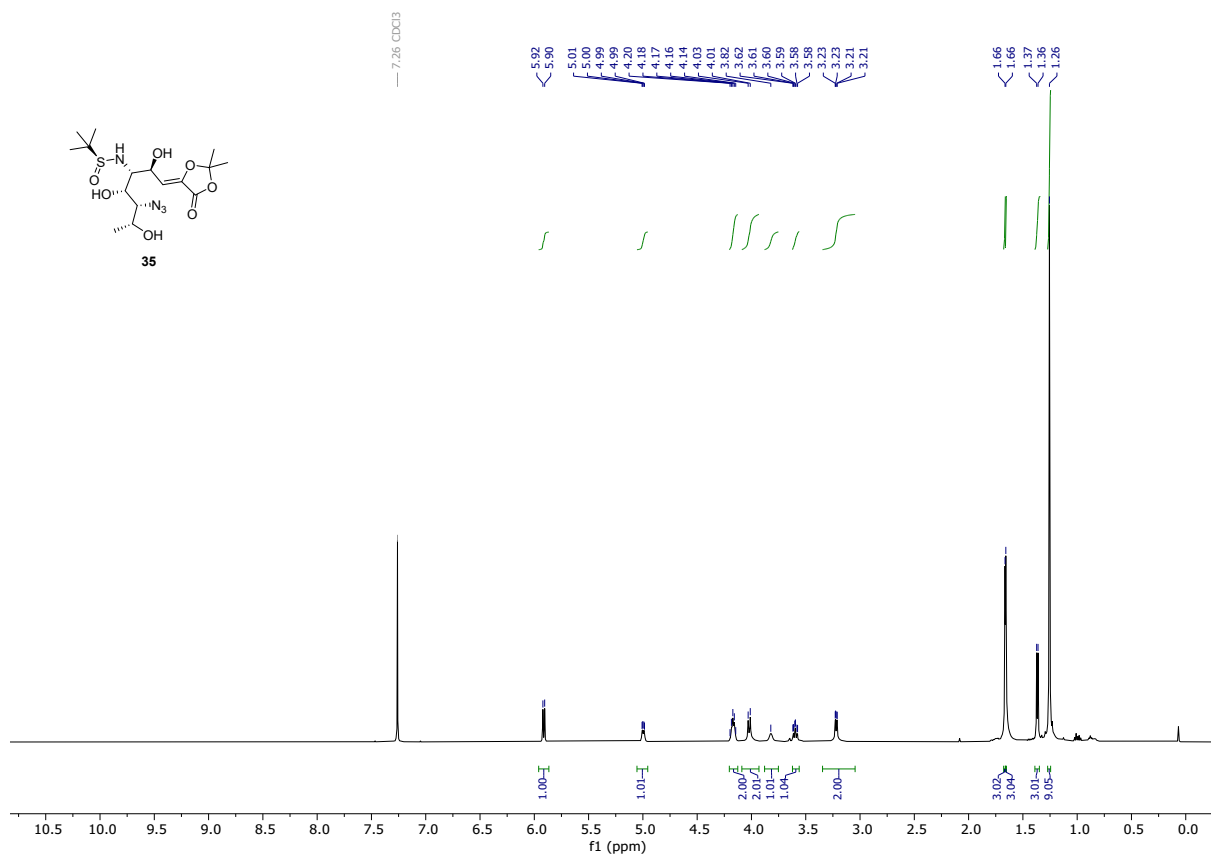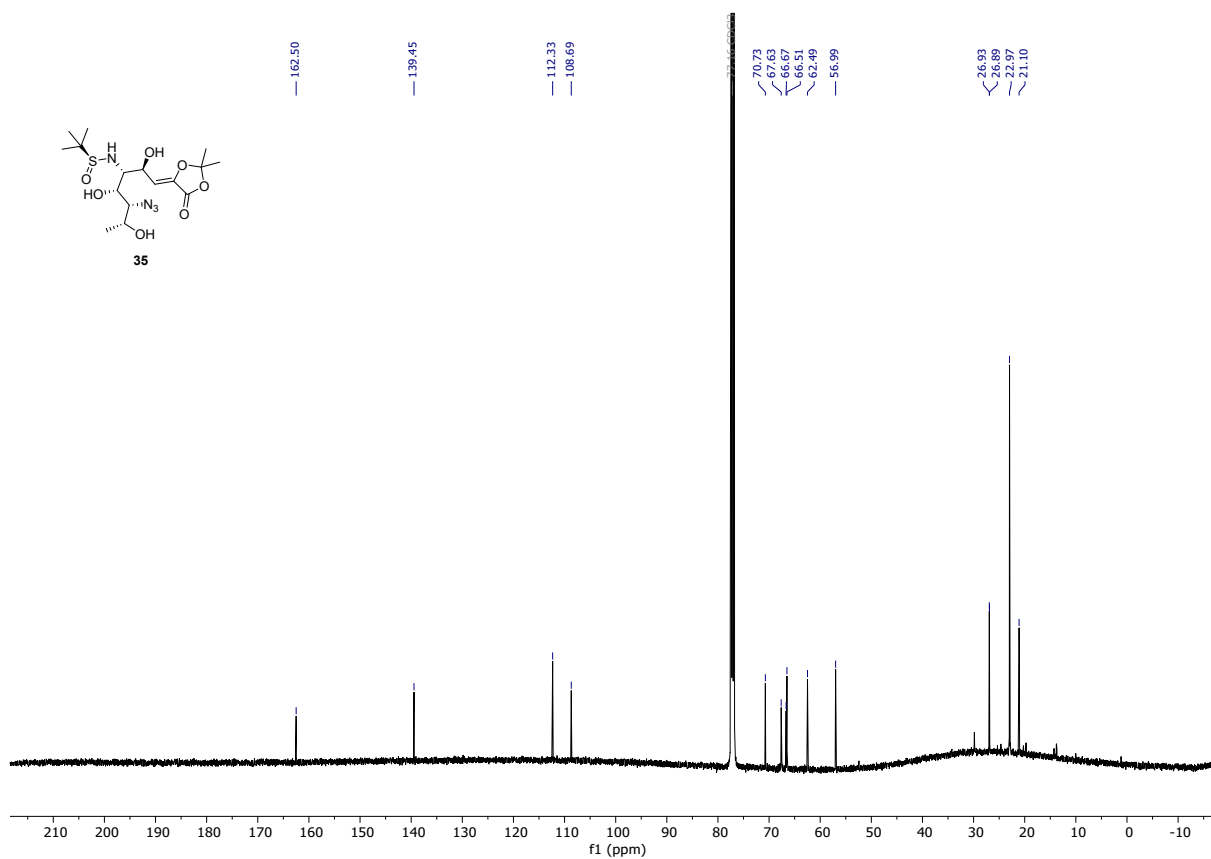

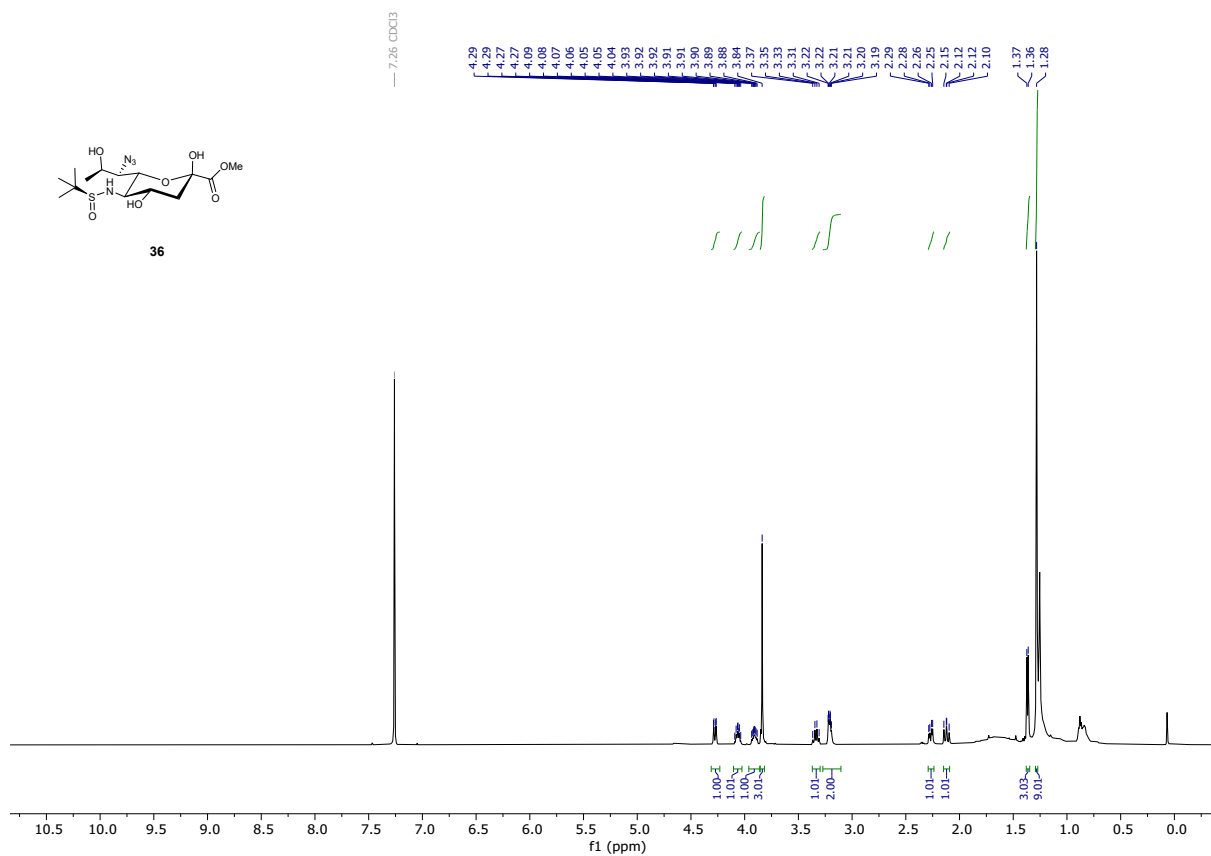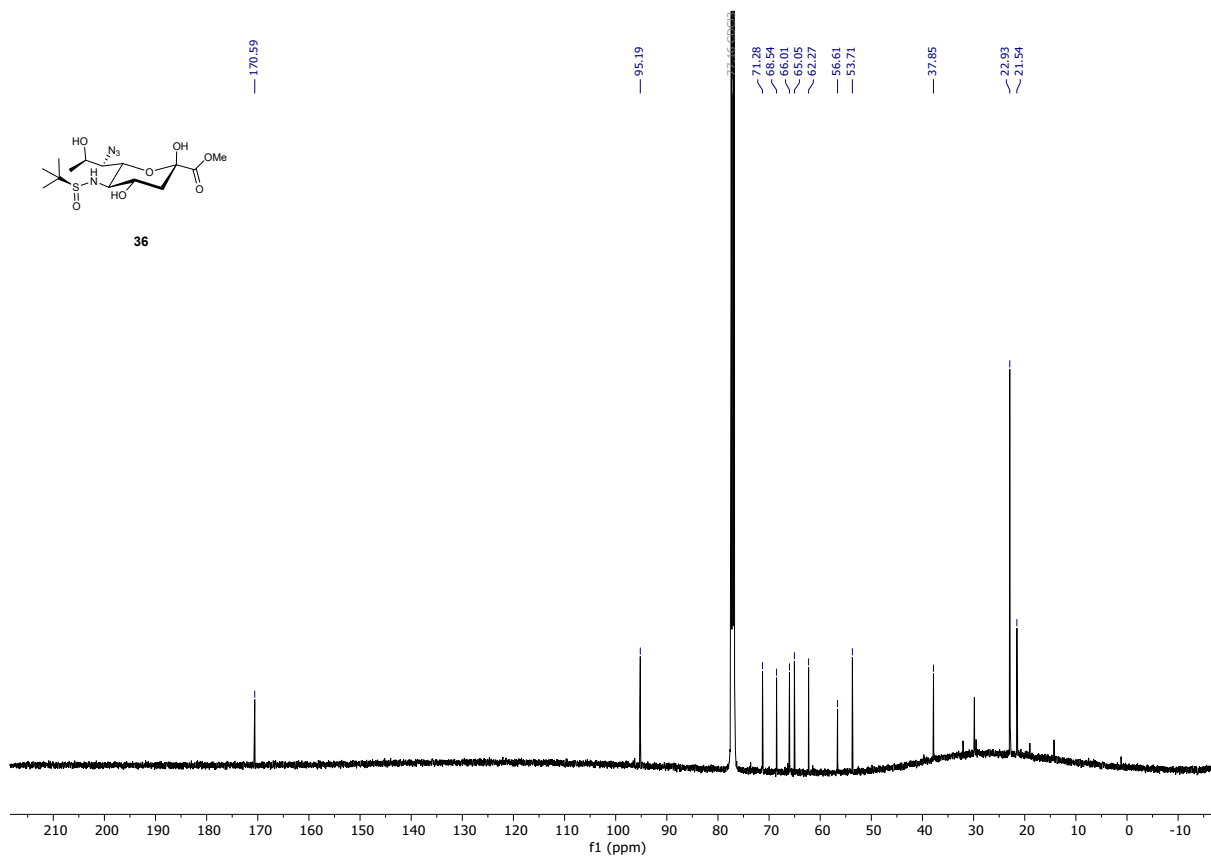



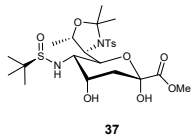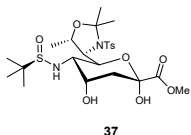

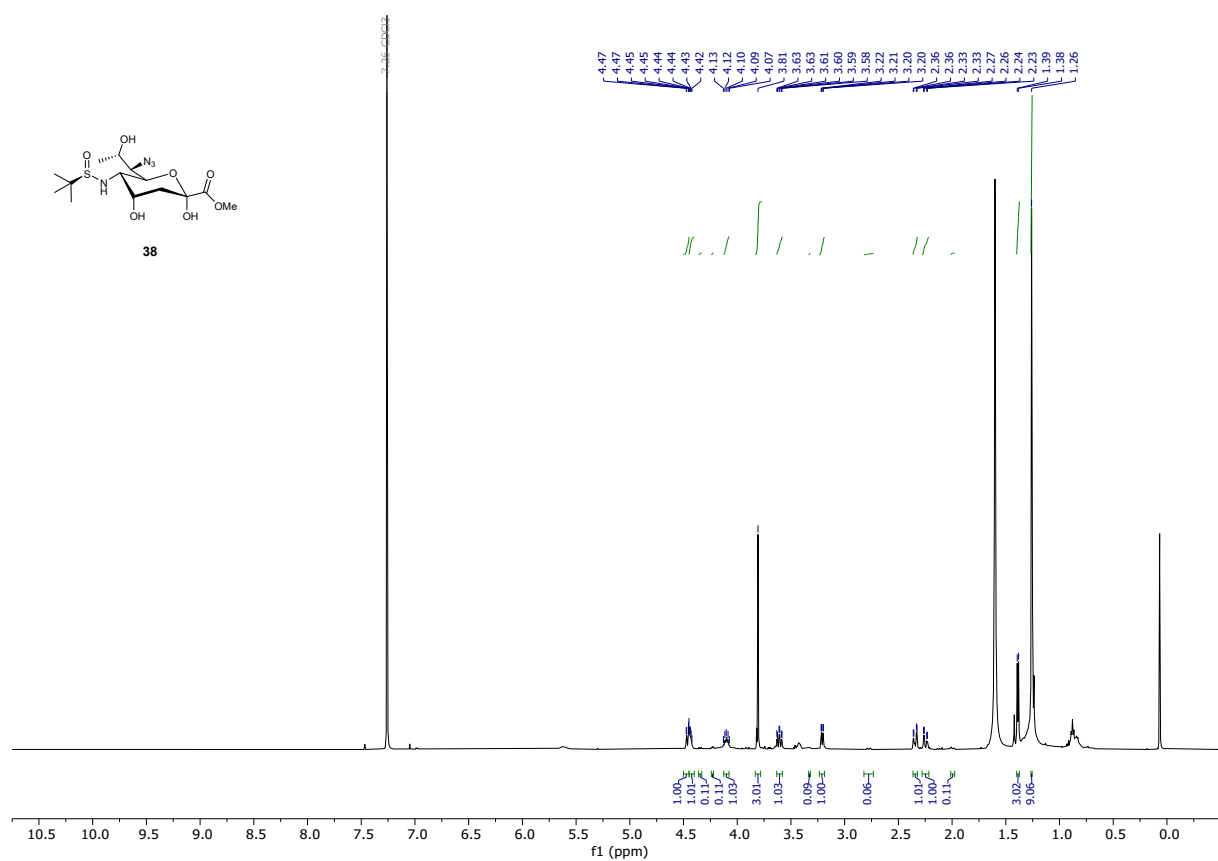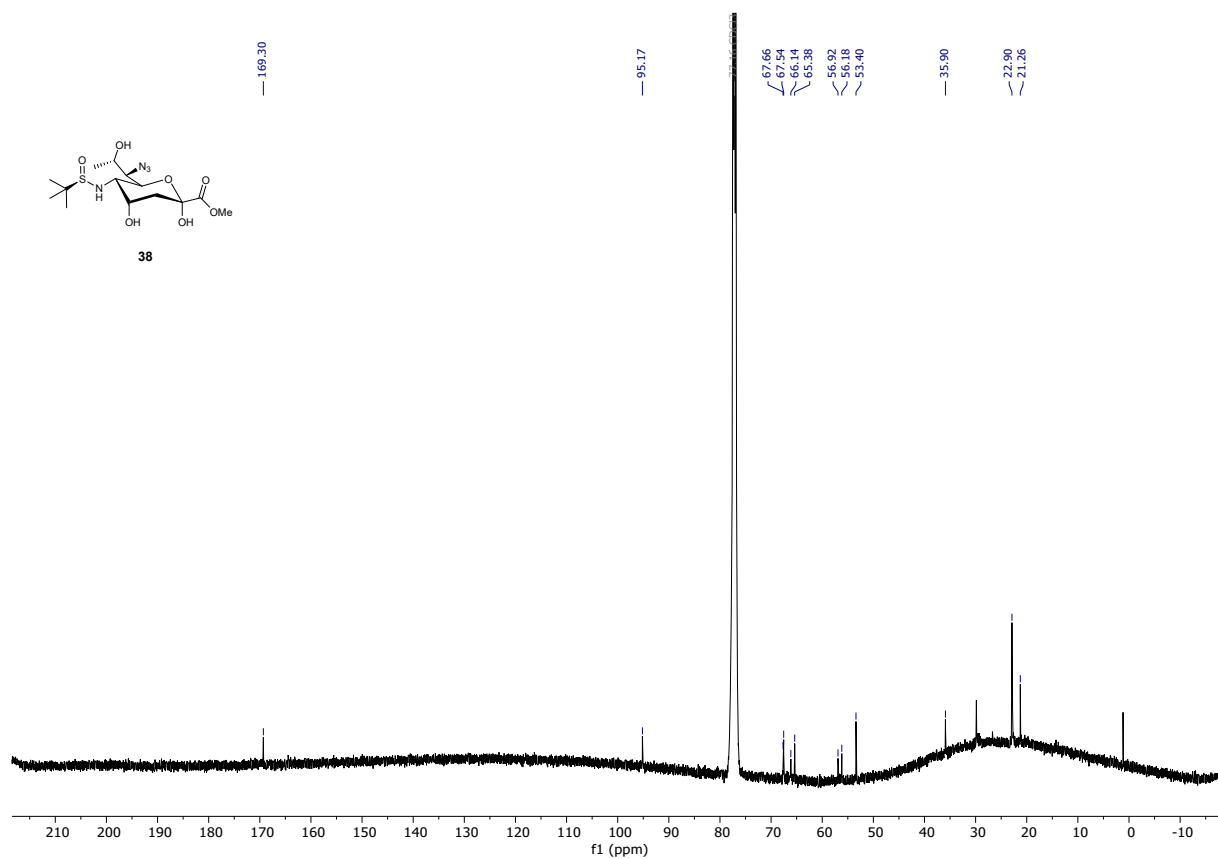

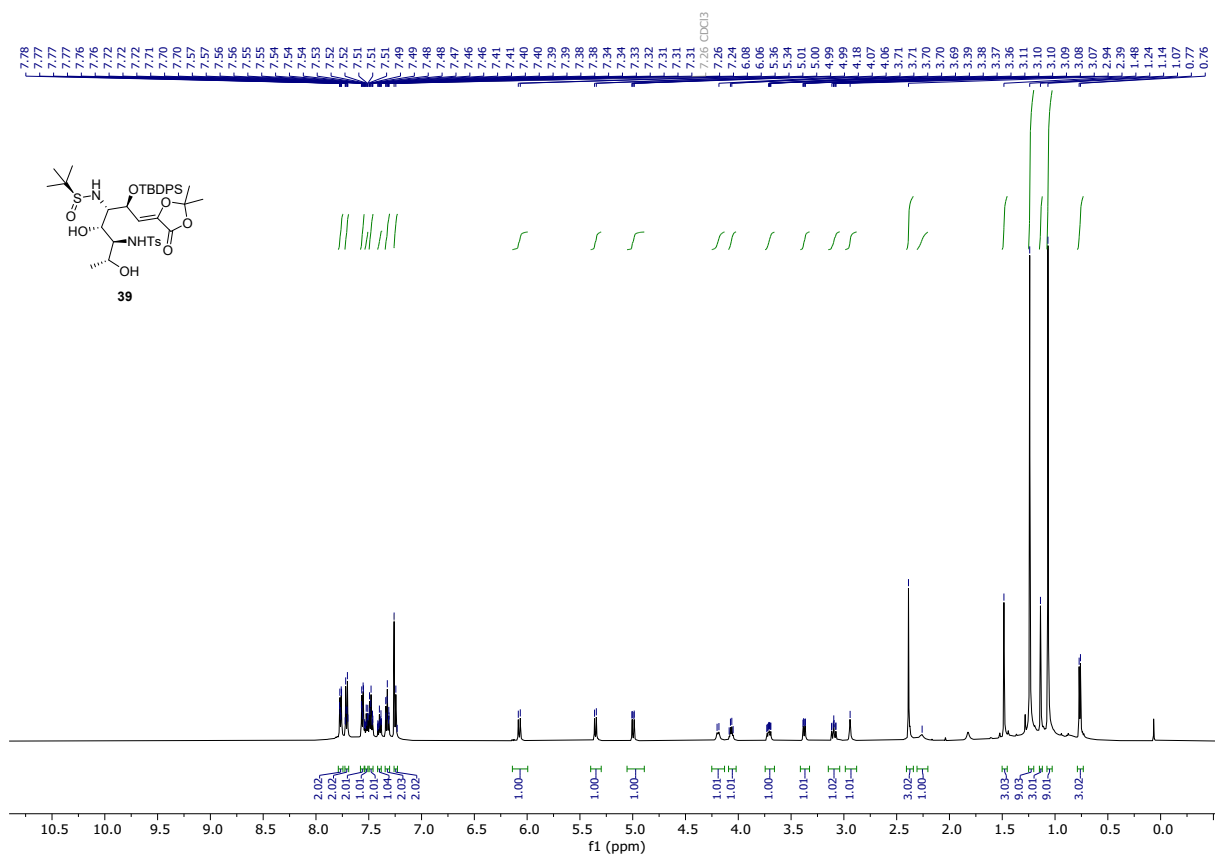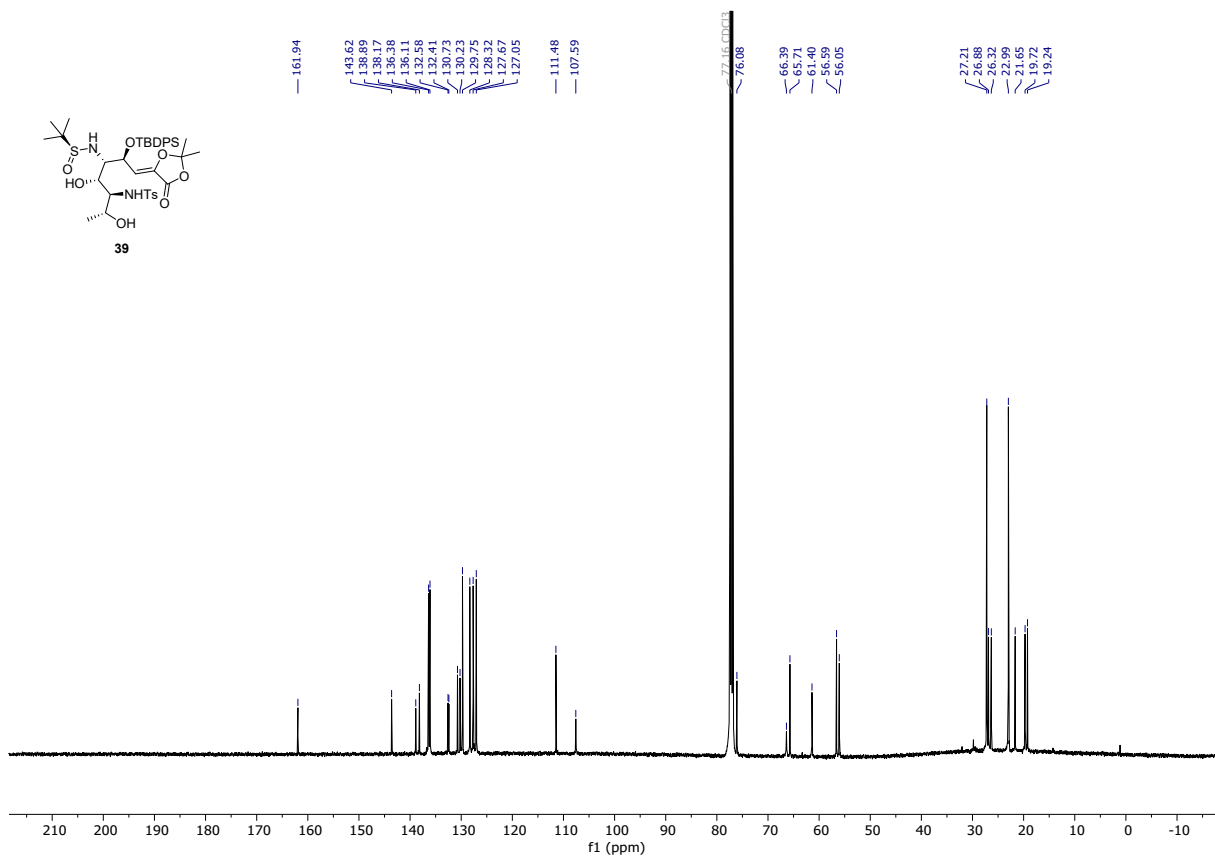

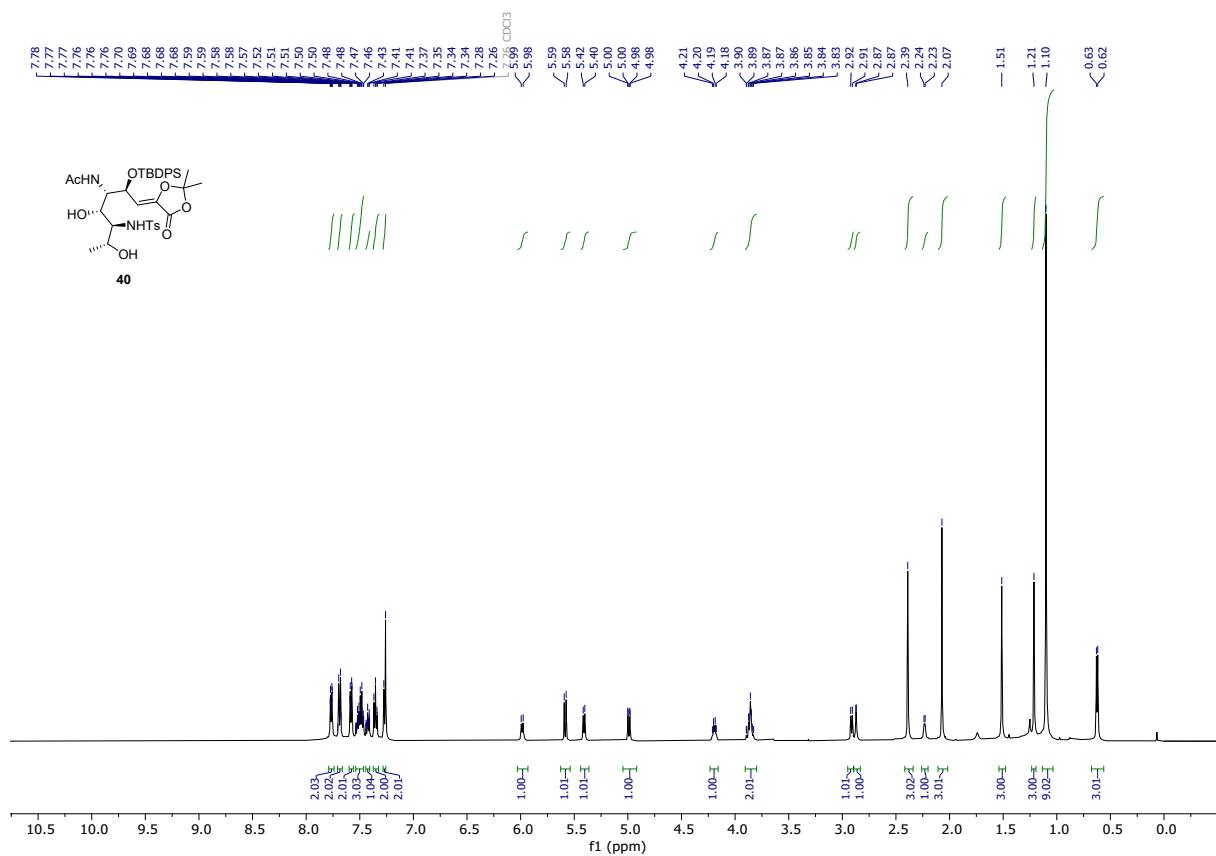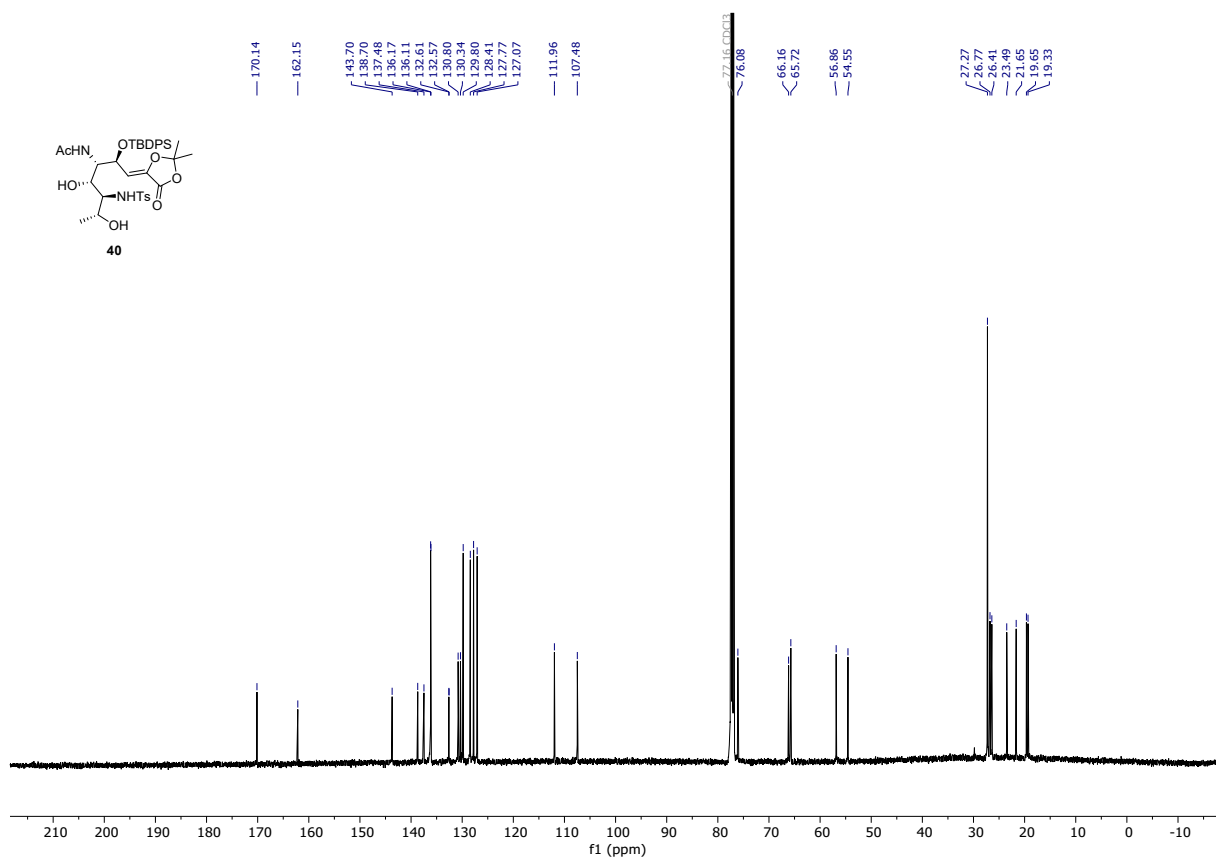

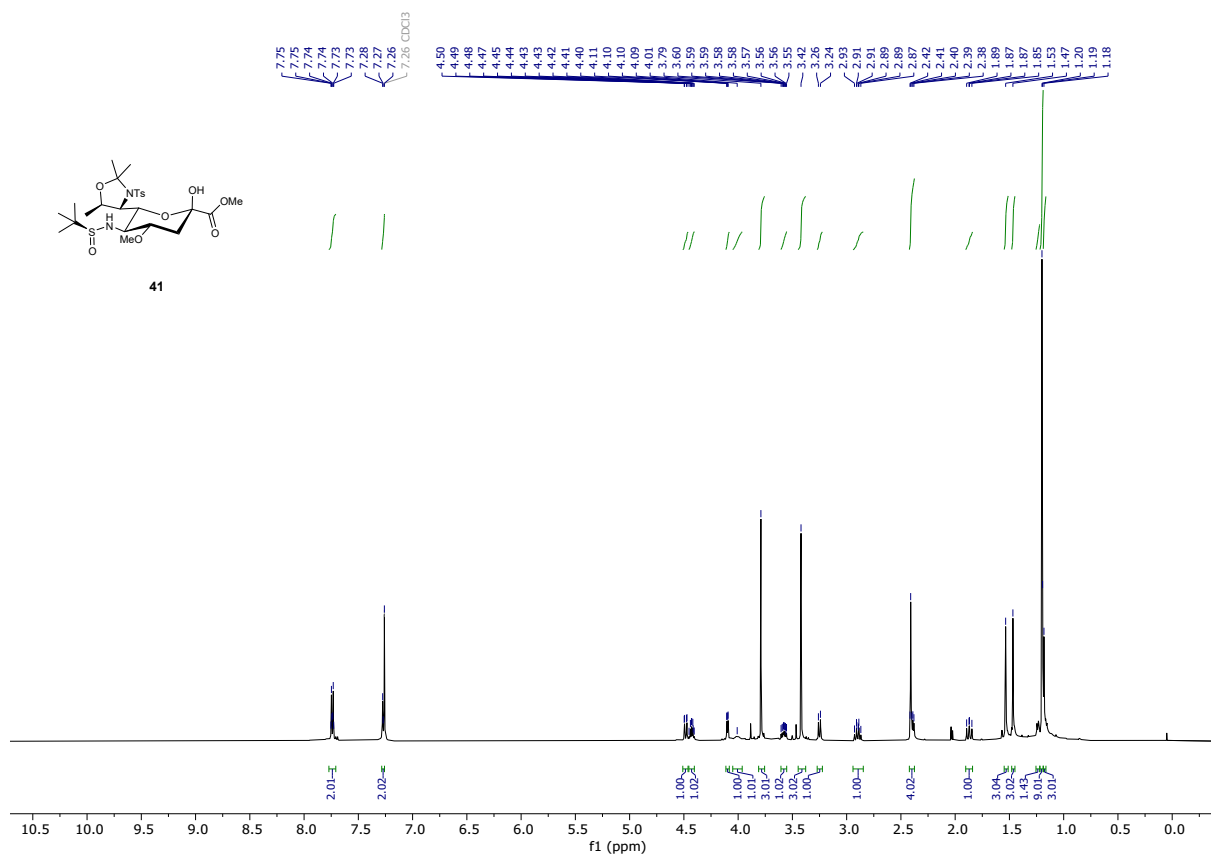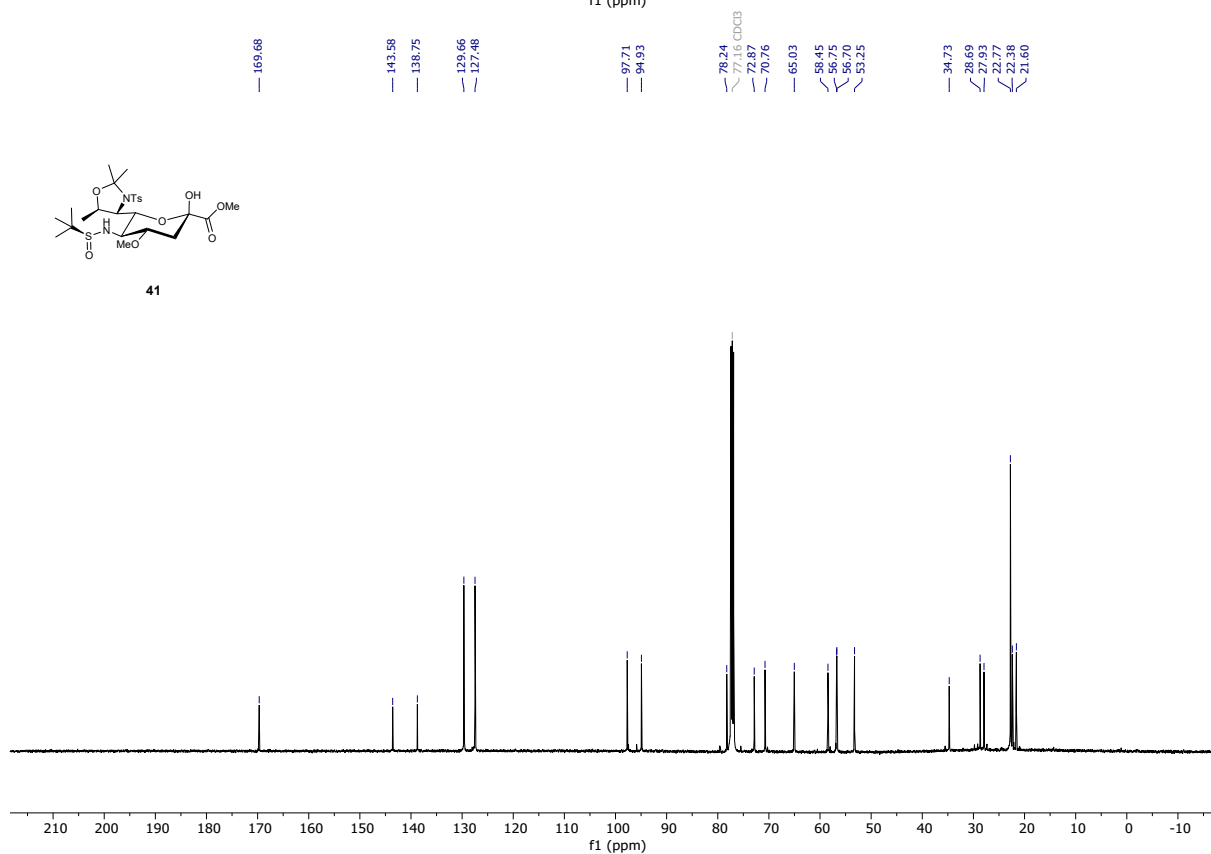

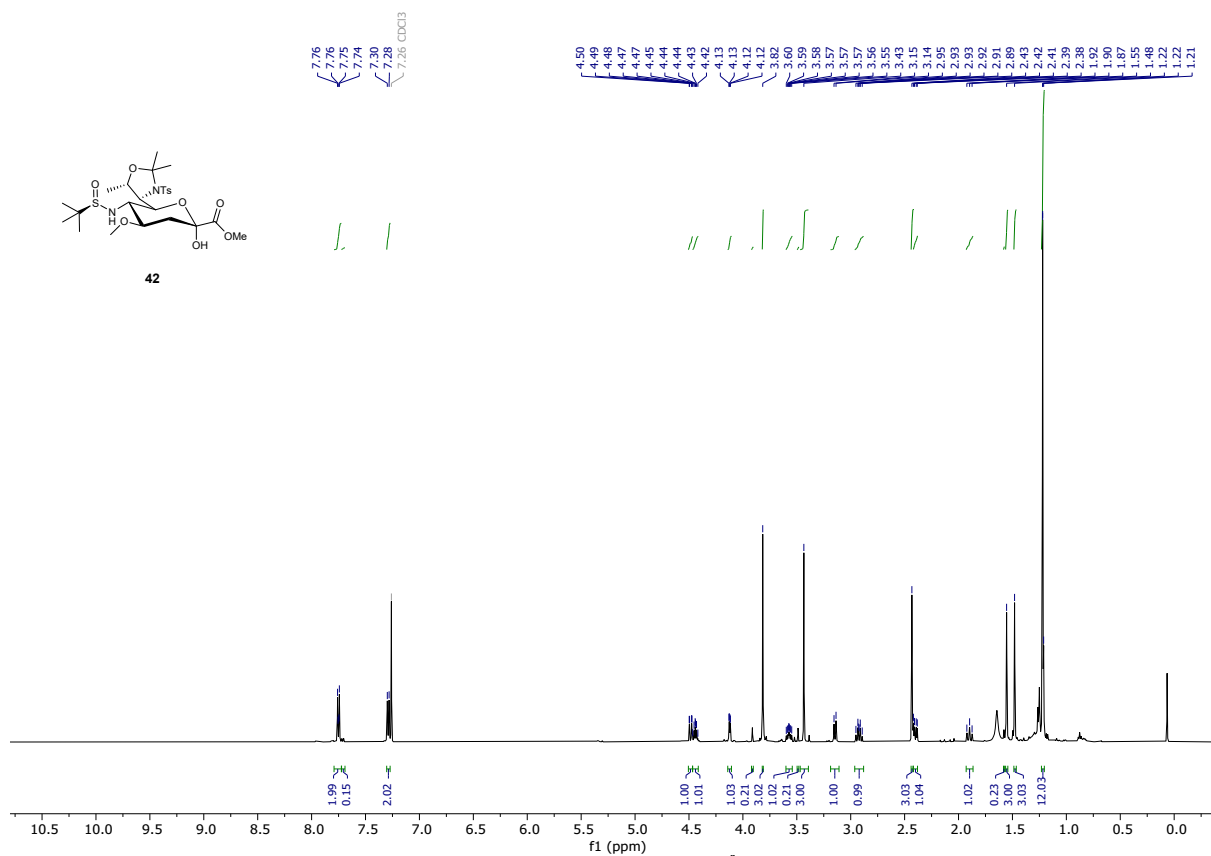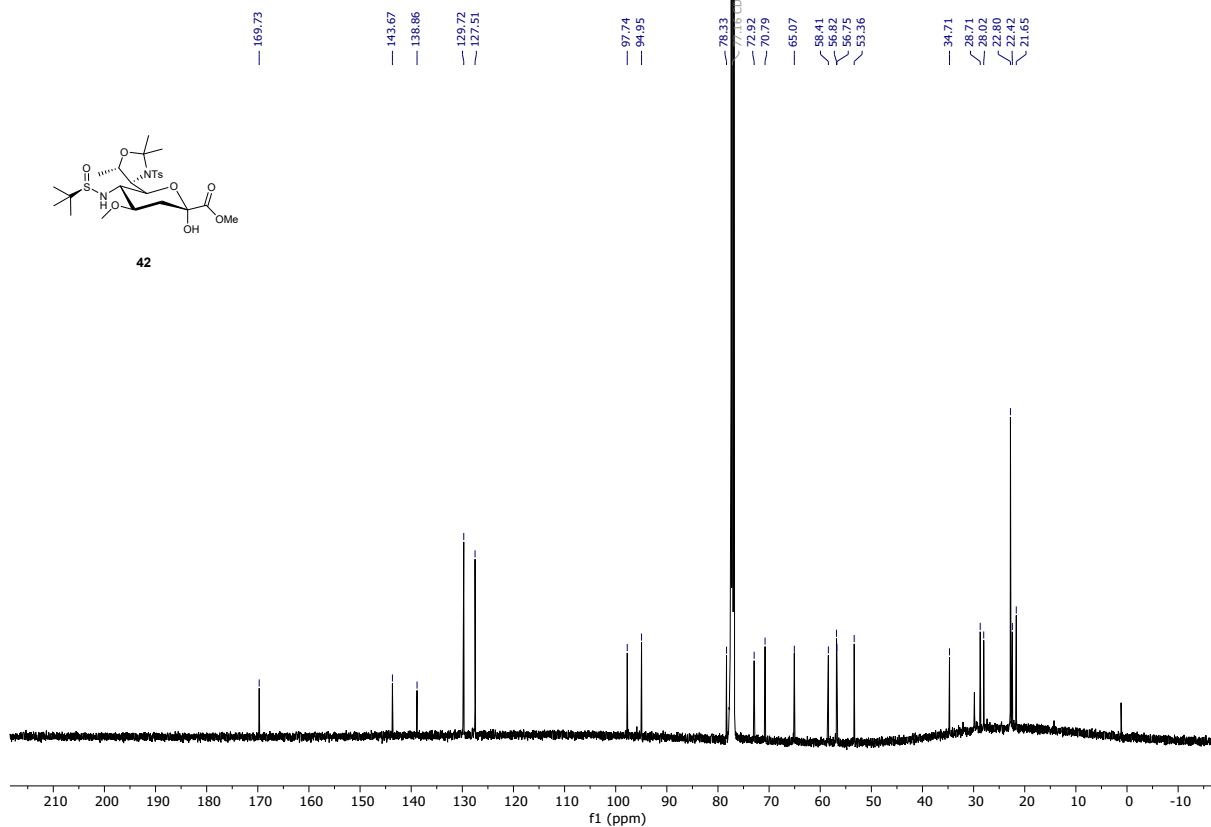

## Author Contributions

Conceptualization (A.J. and C.M.P.), data curation, visualization, methodology (A.J.), formal analysis, investigation and writing original draft (A.J.), resources, supervision (C.M.P.), funding acquisition, validation, writing–review and editing (C.M.P.)

## References

- [1] S. Jarosz, A. Zamqjski, *J. Carbohydr. Chem.* **1993**, *12*, 1223-1228.
- [2] A. Jurys, C. M. Pedersen, *Chem. Eur. J.* **2025**, *31*, e202403453.
- [3] G. R. Fulmer, A. J. M. Miller, N. H. Sherden, H. E. Gottlieb, A. Nudelman, B. M. Stoltz, J. E. Bercaw, K. I. Goldberg, *Organometallics* **2010**, *29*, 2176-2179.
- [4] H. Bagum, K. E. Christensen, M. Genov, A. Pretsch, D. Pretsch, M. G. Moloney, *J. Org. Chem.* **2019**, *84*, 10257-10279.
- [5] Y. Takeda, T. Matsuno, A. K. Sharma, W. M. C. Sameera, S. Minakata, *Chem. Eur. J.* **2019**, *25*, 10226-10231.
- [6] S. Itsuno, K. Watanabe, T. Matsumoto, S. Kuroda, A. Yokoi, A. El-Shehawy, *J. Chem. Soc., Perkin Trans. 1* **1999**, 2011-2016.
- [7] J. P. Beard, J. D. Emerson, A. S. Jacobs, A. J. O'Grady, J. Burrows, K. Koide, *J. Org. Chem.* **2022**, *87*, 13416-13421.
- [8] P. G. Andersson, D. Guijarro, D. Tanner, *J. Org. Chem.* **1997**, *62*, 7364-7375.
- [9] J. C. Williams, J. R. Sheldon, H. D. Imlay, B. F. Dutter, M. M. Draelos, E. P. Skaar, G. A. Sulikowski, *Org. Lett.* **2019**, *21*, 679-682.
- [10] S. Glöckner, D. N. Tran, R. J. Ingham, S. Fenner, Z. E. Wilson, C. Battilocchio, S. V. Ley, *Org. Biomol. Chem.* **2015**, *13*, 207-214.
- [11] K. Graupner, K. Scherlach, T. Bretschneider, G. Lackner, M. Roth, H. Gross, C. Hertweck, *Angew. Chem. Int. Ed.* **2012**, *51*, 13173-13177.
- [12] K. C. Nicolaou, B. S. Safina, M. Zak, S. H. Lee, M. Nevalainen, M. Bella, A. A. Estrada, C. Funke, F. J. Zécri, S. Bulat, *J. Am. Chem. Soc.* **2005**, *127*, 11159-11175.
- [13] U. Kauh, L. Andernach, S. Weck, L. P. Sandjo, S. Jacob, E. Thines, T. Opatz, *J. Org. Chem.* **2016**, *81*, 215-228.
- [14] J. Patel, G. Clavé, P.-Y. Renard, X. Franck, *Angew. Chem. Int. Ed.* **2008**, *47*, 4224-4227.
- [15] S. L. Cobb, J. C. Vederas, *Org. Biomol. Chem.* **2007**, *5*, 1031-1038.
- [16] H. Ohno, H. Hamaguchi, T. Tanaka, *J. Org. Chem.* **2001**, *66*, 1867-1875.
- [17] M. Szostak, M. Spain, D. J. Procter, *J. Org. Chem.* **2012**, *77*, 3049-3059.
